# Supplementary material
Source: publisher figshare collection journal article supplement (https://gsajournals.figshare.com/ndownloader/files/30688421)
Supplement: Supplementary file 1 [file 30688421]

## Sheet: O157H7
Dataset S11. Output from hierarchical analysis shown in Figure S10. Gene description, cluster number within category, Log2 fold change (FC), and adjusted p-value are shown for each gene along the treatments. Name of operons or gene clusters is also shown. Columns corresponding to Log2 FC values are highlighted according to a color scale; red (upregulation) to black (downregulation). Log2 FC value…
Gene ID	Gene description	Cluster #	Treatments								Operon/gene cluster name
			At		At		Ls		Ls
			4 HPI vs. inoculum		24 vs. 4 HPI		4 HPI vs. inoculum		24 vs. 4 HPI
			Log2 FC	Adj. p-value	Log2 FC	Adj. p-value	Log2 FC	Adj. p-value	Log2 FC	Adj. p-value
XF37_00010	hypothetical protein	1	-1.52	0.0556	1.83	0.234	-1.5	0.0476	2.66	0.00114	Locus of enterocyte effacement (lee1-7)
XF37_00015	secretion protein EspF	1	-1.95	0.00665	-1.25	0.569	0.74	0.348	0.44	0.943
XF37_00020	hypothetical protein	1	-2.15	0.00215	-1.77	0.233	0.27	0.855	0.64	0.909
XF37_00030	hypothetical protein	2	-2.22	0.00107	0.55	0.976	0.68	0.491	0.53	0.941
XF37_00040	secretion protein EspD	2	-1.2	0.0164	0.11	0.998	0.15	0.893	-0.11	1
XF37_00045	secretion protein EspA	1	-1.97	0.0266	-1.66	0.52	-0.28	0.864	-0.04	1
XF37_00050	SepL	2	-2.61	1.85e-05	-0.04	0.998	0.18	0.911	-0.85	0.675
XF37_00055	type III secretory protein EscD	2	-1.94	0.00155	0.62	0.923	-1.08	0.0978	0.61	0.701
XF37_00060	Intimin	2	-2.63	1.38e-05	0.05	0.998	-0.05	0.969	-0.63	0.856
XF37_00080	molecular chaperone CesF	3	-2.46	0.00152	1.46	0.497	-0.89	0.437	0.34	1
XF37_00085	hypothetical protein	3	-2.36	1.19e-05	1.25	0.215	-0.75	0.501	0.87	0.636
XF37_00090	SepQ	2	-2.96	4.11e-09	0.53	0.748	0.38	0.727	-1.03	0.377
XF37_00095	hypothetical protein	2	-2.94	0.000458	-1.37	0.593	0.06	0.975	-0.81	0.941
XF37_00100	type III secretion protein	3	-6.56	7.38e-07	2.21	0.449	0.43	0.658	-2.95	0.00187
XF37_00105	type III secretion protein ATPase	4	-1.46	0.00871	-0.8	0.831	0.86	0.231	-1.22	0.15
XF37_00110	secretion system apparatus protein SsaV	2	-2.72	0.000179	0.73	0.917	-0.59	0.538	-0.27	1
XF37_00115	T3SS regulator Mpc	2	-1.51	0.0221	-0.01	0.998	-0.55	0.694	-0.57	1
XF37_00120	SepZ	2	-1.85	7.1e-05	0.23	0.998	-0.82	0.554	-0.76	0.912
XF37_00125	type III secretion apparatus protein	3	-5.61	2.47e-09	1.72	0.193	-0.41	0.705	-0.48	0.984
XF37_00130	type III secretory protein EscJ	3	-6.47	9.89e-08	2.77	0.127	-2.25	0.0236	-0.06	1
XF37_00135	SepD	3	-5.2	9.9e-08	-0.23	0.998	-0.72	0.536	-0.77	0.865
XF37_00140	outer membrane secretin SsaC	3	-3.47	2.91e-08	-0.23	0.998	-0.14	0.915	-0.69	0.727
XF37_00150	GrlA, global regulator of LEE activator	2	-3.22	2.74e-06	1.31	0.365	1.61	0.0729	-1.86	0.168
XF37_00155	negative regulator GrlR	3	-2.59	0.00566	0.11	0.998	-1.55	0.111	0.88	0.754
XF37_00165	secretion protein	3	-4.74	1.75e-05	2.3	0.24	0.78	0.393	-1.26	0.307
XF37_00170	transposase	3	-4.43	5.45e-05	0.95	0.931	0.58	0.715	-2.21	0.199
XF37_00185	hypothetical protein	3	-4.21	1.28e-06	1.39	0.526	-2.86	0.0386	1.9	0.352
XF37_00190	hypothetical protein	3	-4.65	1.53e-08	0.77	0.848	-1.82	0.0236	-0.86	0.643
XF37_00195	hypothetical protein	3	-5.71	6.01e-07	0.59	0.995	-1.9	0.0495	0.93	0.745
XF37_00200	hypothetical protein	3	-4.5	2.12e-08	-0.06	0.998	-2.81	0.000301	-0.49	1
XF37_00205	hypothetical protein	2	-2.77	7.7e-07	0.32	0.991	0.07	0.951	0.12	1
XF37_00210	secretion protein EspG	2	-2.08	2.26e-06	0.27	0.989	-0.91	0.22	-0.55	0.912
XF37_00225	hypothetical protein	1	-1.05	0.326	0.73	0.976	-2.21	0.0137	-0.23	1
XF37_00245	hypothetical protein	5	1.6	0.00166	0.45	0.923	-0.09	0.947	0.37	1
XF37_00285	sugar phosphate antiporter	1	-1.4	0.00798	-1.03	0.622	0.13	0.947	-0.16	1
XF37_00295	histidine kinase	2	-2.46	0.000749	0.17	0.998	-0.38	0.756	0.66	0.837
XF37_00300	transcriptional regulator	4	-1.45	0.0122	-1.65	0.236	1.26	0.222	-0.21	1
XF37_00305	hypothetical protein	3	-3.59	0.00069	0.37	0.998	-0.23	0.888	-0.99	0.704
XF37_00315	hypothetical protein	3	-3.95	2.08e-05	1.27	0.606	0.38	0.783	-0.44	1
XF37_00330	acetolactate synthase catalytic subunit	4	1.53	3.85e-06	-0.51	0.579	1.3	0.0219	-0.21	1
XF37_00335	leader peptide IlvB	5	3.5	1.89e-08	0.1	0.998	0.15	0.923	0.27	1
XF37_00345	hypothetical protein	5	2.16	1.56e-09	-0.28	0.852	0.38	0.632	0.07	1
XF37_00350	toxic peptide TisB	1	1.88	0.00102	0.82	0.58	-0.83	0.494	2.04	0.0556
XF37_00355	multidrug resistance protein D	2	-1.98	6.46e-05	0.11	0.998	-0.06	0.967	0.05	1
XF37_00360	hypothetical protein	5	2.53	1.07e-08	-0.65	0.363	0.23	0.857	0	1
XF37_00405	GntR family transcriptional regulator	4	0.65	0.343	-3.48	0.00268	0.9	0.297	-0.21	1
XF37_00425	heat shock protein IbpA	5	1.11	5.21e-05	-0.07	0.998	-0.01	0.997	0.27	1
XF37_00455	hypothetical protein	5	1.47	3.69e-05	0.63	0.369	-0.94	0.122	-0.36	0.997
XF37_00465	DNA gyrase subunit B	2	-1.21	2.27e-06	-0.03	0.998	-0.03	0.973	0.06	1
XF37_00470	recombination protein F	2	-1.39	3.05e-06	0.16	0.998	0.32	0.786	0.16	1
XF37_00475	DNA polymerase III subunit beta	2	-1.34	2.71e-05	-0.05	0.998	0.13	0.915	-0.21	1
XF37_00485	50S ribosomal protein L34	2	-1.59	0.00459	0.14	0.998	1.43	0.0609	1.03	0.419
XF37_00490	ribonuclease P	2	-2.75	9.11e-08	0.08	0.998	0.75	0.367	0.36	1
XF37_00495	hypothetical protein	2	-2.4	2.78e-06	-0.08	0.998	1.18	0.0598	0.38	0.991
XF37_00500	membrane protein insertase	2	-2.75	2.63e-12	0.25	0.858	0.33	0.736	0.24	1
XF37_00505	tRNA modification GTPase TrmE	2	-1.54	0.00685	-0.01	0.998	0.32	0.771	0.42	1
XF37_00515	enterotoxin	1	-1.89	0.000408	0.16	0.998	-1.67	0.0352	-0.31	1
XF37_00520	tryptophanase leader peptide	3	-4.59	5.8e-13	0.32	0.96	-3.21	0.000443	-2.77	0.0395	Tryptophanase (tna) operon
XF37_00525	cysteine desulfhydrase	3	-4.52	1.55e-15	0.02	0.998	-4.04	8.11e-09	-1.47	0.0639
XF37_00530	tryptophan permease	3	-3.35	6.73e-08	0	0.999	-4.02	2.67e-09	-0.28	1
XF37_00555	adenine permease PurP	2	-0.47	0.288	0.15	0.998	2.41	0.00404	-1.12	0.48
XF37_00560	6-phosphogluconate phosphatase	2	-1.09	0.0198	0.14	0.998	0.64	0.509	-0.5	0.943
XF37_00565	type III effector	3	-2.36	2.95e-06	0.25	0.998	-2.28	0.000268	0.47	0.943
XF37_00585	type III effector protein	3	-3.27	3.49e-07	0.57	0.921	-0.8	0.456	-1.02	0.543
XF37_00590	hypothetical protein	1	-1.96	0.00899	-0.9	0.829	0.44	0.732	0.75	0.745
XF37_00600	transcriptional regulator PhoU	2	-1.05	0.0472	0.87	0.63	3.43	1.01e-07	-0.43	0.921	High-affinity phosphate transport system (pst) operon
XF37_00605	phosphate ABC transporter ATP-binding protein	2	-1.11	0.00477	-0.23	0.998	3.01	5.45e-06	-1.02	0.286
XF37_00610	phosphate transporter permease subunit PtsA	2	-2.16	1.72e-06	0.16	0.998	3.35	0.000666	-0.83	0.88
XF37_00615	phosphate transporter permease subunit PstC	2	-2.41	1.85e-06	0.23	0.998	3.76	8.87e-05	-0.67	0.946
XF37_00620	phosphate ABC transporter substrate-binding protein	2	-2.4	2.66e-08	1.15	0.0514	5.25	1.85e-11	-0.79	0.416
XF37_00630	fimbrial protein	2	-2.11	4.58e-05	0.89	0.525	0.17	0.913	-0.03	1
XF37_00650	fimbrial protein	3	-3.43	0.00368	1.13	0.923	-1.43	0.253	1.38	0.497
XF37_00655	glucosamine--fructose-6-phosphate aminotransferase	2	-2.1	3.9e-09	0.17	0.989	-0.31	0.771	-0.23	1
XF37_00660	bifunctional N-acetylglucosamine-1-phosphate uridyltransferase/glucosamine-1-phosphate acetyltransferase	2	-1.97	1.4e-10	-0.08	0.998	-0.15	0.921	-0.22	1
XF37_00670	ATP synthase F0F1 subunit beta	2	-1.63	1.87e-08	0.11	0.998	-1.01	0.162	-0.62	0.839	ATP (atp) operon
XF37_00675	ATP F0F1 synthase subunit gamma	2	-1.94	1.77e-07	0.31	0.874	-1.32	0.0417	-0.17	1
XF37_00680	ATP F0F1 synthase subunit alpha	2	-2.51	2.06e-11	0.42	0.413	-1.25	0.115	-0.32	1
XF37_00685	ATP F0F1 synthase subunit delta	2	-2.2	9.89e-10	0.18	0.976	-0.88	0.141	-0.62	0.694
XF37_00690	ATP F0F1 synthase subunit B	2	-1.78	2.92e-09	0.14	0.989	-0.73	0.409	-0.22	1
XF37_00695	ATP F0F1 synthase subunit C	2	-1.59	5.87e-06	0.03	0.998	-0.97	0.343	-0.43	1
XF37_00700	ATP synthase F0F1 subunit A	2	-2.07	9.06e-08	-0.05	0.998	-0.69	0.288	-0.07	1
XF37_00710	16S rRNA methyltransferase	2	-2.85	3.58e-06	0.52	0.944	0.23	0.818	0.36	1
XF37_00715	tRNA uridine 5-carboxymethylaminomethyl modification protein	2	-2.45	4.54e-09	-0.04	0.998	1.08	0.214	0.23	1
XF37_00720	FMN-binding protein MioC	2	-0.96	0.000361	-0.06	0.998	1.22	0.0186	0.05	1
XF37_00750	D-ribose pyranase	5	1.39	1.77e-07	-0.84	0.0268	-0.43	0.619	-0.45	0.968
XF37_00755	sugar ABC transporter ATP-binding protein	5	1.08	0.0181	-0.45	0.942	-0.07	0.961	0.23	1
XF37_00765	D-ribose transporter subunit RbsB	1	1.12	2.73e-05	-0.5	0.222	-2.22	0.00127	-0.38	1
XF37_00770	ribokinase	2	-1.03	0.0133	-0.18	0.998	-0.4	0.71	-0.07	1
XF37_00790	hypothetical protein	4	2.18	0.0049	0.64	0.914	4.37	0.000319	0.28	1
XF37_00805	hypothetical protein	4	2.95	0.000646	0.64	0.935	4.37	3.98e-05	0.28	1
XF37_00825	host-nuclease inhibitor protein Gam	4	1.64	0.00121	-0.08	0.998	1.09	0.254	-0.11	1
XF37_00860	conjugal transfer protein TraR	2	-1.53	0.00146	0.64	0.789	-0.12	0.923	-0.76	0.603
XF37_00870	hypothetical protein	2	-1.09	0.00179	-0.1	0.998	-0.35	0.769	-0.54	0.956
XF37_00875	hypothetical protein	2	-1.19	0.045	0.73	0.843	-0.98	0.406	0.8	0.841
XF37_00965	multifunctional fatty acid oxidation complex subunit alpha	5	3.25	2.29e-15	-0.15	0.882	-0.74	0.446	0.19	1
XF37_00970	3-ketoacyl-CoA thiolase	5	3.39	1.53e-11	-0.06	0.998	-0.88	0.304	0.46	1
XF37_00975	FMN reductase	2	-1.29	0.000498	-0.13	0.998	0.11	0.92	0	1
XF37_00995	twin-arginine protein translocation system subunit TatC	2	-1.85	0.00159	-0.31	0.998	0.35	0.701	-0.54	0.865
XF37_01035	carboxymethylenebutenolidase	5	1.91	3.31e-08	-0.24	0.942	-0.15	0.905	-0.04	1
XF37_01040	5-methyltetrahydropteroyltriglutamate--homocysteine methyltransferase	4	4.41	1.15e-12	-1.39	0.00461	4	2.36e-07	-1.85	0.0358
XF37_01045	transcriptional regulator	5	4.68	7.74e-10	-0.57	0.69	4.3	6.5e-10	1.11	0.108
XF37_01050	membrane protein	4	0.91	0.0538	-0.16	0.998	1.49	0.0118	0.04	1
XF37_01055	hydrolase	2	-1.8	1.17e-05	-0.22	0.998	-0.21	0.853	0.28	1
XF37_01065	homoserine transporter	2	0.03	0.963	0.02	0.998	1.28	0.0318	-0.51	0.859
XF37_01070	threonine transporter	2	-0.23	0.456	-0.18	0.998	1.28	0.0279	-0.18	1
XF37_01075	ATP-dependent DNA helicase RecQ	2	-1.28	0.00183	-0.1	0.998	1.15	0.281	-0.3	1
XF37_01090	chemotaxis protein CheD	2	-1.49	0.00637	-0.24	0.998	0.36	0.706	-0.11	1
XF37_01105	hypothetical protein	3	-5.83	1.56e-09	2.75	0.0125	-0.23	0.894	-0.08	1
XF37_01120	hypothetical protein	5	2.92	0.000288	0.27	0.998	1.15	0.0655	0	1
XF37_01140	flavin mononucleotide phosphatase	2	-1.4	0.000626	0.1	0.998	-0.45	0.702	0.21	1
XF37_01195	arylsulfatase	5	1.15	0.0229	0.24	0.998	-0.18	0.819	-0.4	0.921
XF37_01215	NA	4	1.58	0.00261	-0.93	0.551	1.27	0.086	0.19	1
XF37_01220	NA	4	1.46	0.0224	-0.62	0.935	0.72	0.379	0.33	1
XF37_01225	D-alanine/D-serine/glycine permease	1	-0.21	0.599	0.03	0.998	-1.77	0.00207	0.5	0.878
XF37_01270	UDP-N-acetyl-D-mannosamine dehydrogenase	2	-1.25	0.000335	0.26	0.981	-0.37	0.702	0.05	1
XF37_01275	UDP-N-acetylglucosamine 2-epimerase	2	-1.44	0.0159	0.04	0.998	-0.39	0.648	0	1
XF37_01280	lipopolysaccharide biosynthesis protein WzzE	2	-1.34	0.000224	-0.03	0.998	-0.46	0.535	0.48	0.888
XF37_01285	UDP-phosphate N-acetylglucosaminyl 1-phosphate transferase	2	-1.64	1.89e-05	-0.04	0.998	-0.43	0.575	0.15	1
XF37_01290	hypothetical protein	2	-1.8	7e-05	0.67	0.663	0	0.999	-0.41	0.968
XF37_01295	transcription termination factor Rho	2	-2.05	4.48e-10	0.14	0.981	0.61	0.546	0.15	1
XF37_01320	ATP-dependent DNA helicase Rep	2	-0.89	0.0039	-0.46	0.78	1.54	0.0154	0.05	1
XF37_01325	hypothetical protein	1	0.02	0.961	0.08	0.998	-1.21	0.0357	-0.2	1
XF37_01335	ketol-acid reductoisomerase	2	-0.32	0.179	-0.88	0.0839	1.83	0.00821	0.29	1	Isoleucine and valine biosynthetic pathway (ilv) operon
XF37_01345	threonine dehydratase	2	0.86	0.0522	0	0.999	2.07	0.00155	-0.33	1
XF37_01350	dihydroxy-acid dehydratase	2	0.35	0.331	-0.01	0.998	2.23	0.00231	-0.26	1
XF37_01355	branched-chain amino acid aminotransferase	2	0.24	0.457	0.05	0.998	2.34	0.00541	-0.37	1
XF37_01360	acetolactate synthase 2 regulatory subunit	4	0.88	0.0922	-0.11	0.998	2.51	0.000703	-0.49	0.982
XF37_01365	acetolactate synthase catalytic subunit	4	1.41	6.04e-06	-0.24	0.954	2.89	2.29e-05	-0.45	0.968
XF37_01370	acetolactate synthase	4	4.09	5.33e-07	-0.01	0.998	2.44	0.000703	-0.08	1
XF37_01385	transcriptional regulator HdfR	5	2.2	0.000147	-0.19	0.998	-0.17	0.903	0.3	1
XF37_01405	recombinase	5	1.81	1.19e-05	0.77	0.268	0.12	0.913	0.06	1
XF37_01410	exonuclease	5	2.27	0.000107	0.29	0.995	0.39	0.652	0.01	1
XF37_01430	hypothetical protein	4	0.18	0.767	-0.72	0.776	-0.13	0.924	-2.53	0.0126
XF37_01440	NA	4	1.35	0.00315	-0.25	0.998	1.66	0.0201	0.06	1
XF37_01445	DgsA anti-repressor MtfA	5	1.76	2.92e-07	-0.27	0.925	-0.64	0.438	-0.34	1
XF37_01460	hypothetical protein	2	-1.65	0.0108	0.1	0.998	0.11	0.93	-0.53	0.853
XF37_01475	hypothetical protein	2	-2.55	3.56e-08	0.17	0.998	0.06	0.963	-0.22	1
XF37_01570	shikimate dehydrogenase	2	-1.53	0.000402	0.28	0.989	-0.21	0.851	0.09	1
XF37_01575	tRNA(ANN) t(6)A37 threonylcarbamoyladenosine modification protein	2	-1.65	4.55e-07	0.04	0.998	0.15	0.913	0.25	1
XF37_01585	hypothetical protein	5	1.59	6.66e-10	-0.15	0.906	-0.62	0.651	-0.1	1
XF37_01590	hypothetical protein	5	1.59	1.37e-08	-0.48	0.256	-0.22	0.848	-0.15	1
XF37_01595	peptide deformylase	1	0.21	0.42	0.17	0.989	-1.57	0.0258	0.36	1
XF37_01600	methionyl-tRNA formyltransferase	2	-1.34	0.000994	0.2	0.998	-0.28	0.811	0.24	1
XF37_01605	16S rRNA methyltransferase	2	-2.66	3.19e-07	0.42	0.931	0.04	0.966	0.3	1
XF37_01610	potassium transporter peripheral membrane component	2	-1.78	5.73e-05	0.41	0.936	-1.11	0.0471	0.33	1
XF37_01615	large-conductance mechanosensitive channel	1	1.1	8.25e-06	-0.22	0.881	-2.2	0.00148	-0.46	0.986
XF37_01625	zinc-responsive transcriptional regulator	5	1.4	0.0054	-0.12	0.998	0.2	0.857	0	1
XF37_01635	50S ribosomal protein L17	2	-1.5	0.0247	0.78	0.877	-0.01	0.998	1.48	0.229
XF37_01640	DNA-directed RNA polymerase subunit alpha	2	-1.8	8.97e-09	0.09	0.998	0.36	0.672	0.1	1
XF37_01645	30S ribosomal protein S4	2	-2.21	6.18e-10	-0.02	0.998	0.46	0.569	-0.27	1
XF37_01650	30S ribosomal protein S11	2	-2.2	5e-09	-0.21	0.976	0.72	0.506	-0.3	1
XF37_01655	30S ribosomal protein S13	2	-1.72	2.86e-07	0.14	0.998	0.74	0.41	0.58	0.911
XF37_01665	preprotein translocase subunit SecY	2	-1.54	3.63e-07	-0.03	0.998	0.14	0.898	-0.03	1
XF37_01675	50S ribosomal protein L30	2	-1.71	0.0015	-0.01	0.998	0.54	0.533	-0.23	1
XF37_01680	30S ribosomal protein S5	2	-2.07	3.56e-08	0.09	0.998	0.1	0.932	0.24	1
XF37_01685	50S ribosomal protein L18	2	-2.11	2.48e-08	0.1	0.998	0.2	0.838	0.23	1
XF37_01690	50S ribosomal protein L6	2	-2.37	5.21e-12	0.2	0.852	0.24	0.862	0.05	1
XF37_01695	30S ribosomal protein S8	2	-2.03	1.33e-08	-0.04	0.998	0.5	0.554	0.25	1
XF37_01700	30S ribosomal protein S14	2	-2.33	2.24e-10	0.08	0.998	0.55	0.544	0.11	1
XF37_01705	50S ribosomal protein L5	2	-2.45	1.83e-11	0.02	0.998	0.54	0.441	-0.17	1
XF37_01710	50S ribosomal protein L24	2	-2.19	4.43e-08	0.08	0.998	0.75	0.251	0.17	1
XF37_01715	50S ribosomal protein L14	2	-2.15	1.08e-10	0.13	0.991	0.46	0.639	-0.06	1
XF37_01725	50S ribosomal protein L29	2	-1.37	3.59e-05	0.39	0.829	-0.29	0.769	0.21	1
XF37_01730	50S ribosomal protein L16	2	-2.02	2.59e-09	0.17	0.983	-0.7	0.389	0.21	1
XF37_01735	30S ribosomal protein S3	2	-1.79	1.77e-06	0.08	0.998	-0.22	0.805	-0.16	1
XF37_01740	50S ribosomal protein L22	2	-2.06	0.000164	0.41	0.981	-0.56	0.452	0.46	0.904
XF37_01745	30S ribosomal protein S19	2	-2.25	2.86e-07	0.35	0.944	-0.01	0.995	0.47	0.982
XF37_01750	50S ribosomal protein L2	2	-2.42	5.33e-08	0.17	0.998	0.08	0.957	0.04	1
XF37_01755	50S ribosomal protein L23	2	-2.6	2.14e-10	0.2	0.981	0.16	0.905	0.07	1
XF37_01760	50S ribosomal protein L4	2	-2.78	3e-11	0.18	0.982	0.15	0.899	0.07	1
XF37_01765	50S ribosomal protein L3	2	-2.47	2.01e-10	0.23	0.909	0.44	0.587	0.38	0.991
XF37_01770	30S ribosomal protein S10	2	-2.72	4.68e-11	0.23	0.937	0.54	0.639	0.37	1
XF37_01780	peptidase A24	5	1.48	0.0169	-0.09	0.998	-1.76	0.0411	0.21	1
XF37_01785	bacterioferritin	5	1.15	4.27e-06	0.51	0.198	-0.84	0.464	1.16	0.504
XF37_01805	peroxidase	2	-1.28	2.77e-05	-0.15	0.998	0.37	0.709	0.21	1
XF37_01815	hypothetical protein	2	-1.03	0.0135	-0.56	0.849	0.96	0.231	-0.9	0.548
XF37_01840	antirepressor	1	-0.38	0.433	0.09	0.998	-1.21	0.0482	0.2	1
XF37_01845	DNA-binding protein	3	-2.67	0.000774	-0.23	0.998	-1.72	0.0655	0.8	0.845
XF37_01930	hypothetical protein	5	1.24	0.0187	-0.55	0.918	0.12	0.934	-0.01	1
XF37_01950	hypothetical protein	2	-1.3	0.00214	0.39	0.948	-0.24	0.829	0.06	1
XF37_01980	hemolysin E	3	-2.86	1.66e-07	0.52	0.864	-1.24	0.138	-2.38	0.0162
XF37_01985	DNA polymerase V subunit UmuD	5	2.77	6.68e-05	-0.7	0.84	-0.27	0.755	0.99	0.211
XF37_01990	DNA polymerase V subunit UmuC	4	1.88	0.000467	-0.52	0.905	0.48	0.545	-0.29	1
XF37_02010	SpoVR family protein	5	3.22	1.14e-14	0.09	0.998	-0.36	0.624	-0.26	1
XF37_02015	amino acid dehydrogenase	5	1.9	2.63e-09	-0.17	0.957	-0.84	0.215	-0.22	1
XF37_02020	alanine racemase	5	2.72	1.32e-09	-0.16	0.997	-0.88	0.281	-0.26	1
XF37_02025	type IV secretion protein Rhs	2	-2.19	0.00456	1.32	0.589	0.96	0.269	-0.94	0.576
XF37_02030	hypothetical protein	3	-3.5	0.000424	2.48	0.222	0.38	0.823	-0.6	0.997
XF37_02040	membrane protein	5	2.21	1.9e-05	-0.4	0.942	0.38	0.651	-1.4	0.0853
XF37_02045	hypothetical protein	5	2.71	4.55e-08	-0.38	0.872	0.47	0.546	-1.37	0.0918
XF37_02065	hypothetical protein	1	1.5	6.07e-07	0.46	0.411	-3.05	3.07e-06	0.1	1
XF37_02085	L-lactate permease	2	-1.98	2.48e-05	0.15	0.998	0.32	0.811	0.07	1
XF37_02090	transcriptional regulator	2	-1.85	0.000161	0.04	0.998	0.06	0.969	0.12	1
XF37_02100	rRNA methylase	1	-1.18	0.00228	-0.88	0.46	0.29	0.839	0.38	1
XF37_02110	glycerol-3-phosphate dehydrogenase	2	-1.71	2.31e-05	-0.02	0.998	-0.35	0.617	0.02	1
XF37_02130	phosphoglyceromutase	2	-1.59	5.4e-06	0.14	0.998	-0.27	0.79	0.38	1
XF37_02140	hypothetical protein	2	-1.49	0.00128	-0.39	0.979	0.65	0.457	0.62	0.84
XF37_02145	glycosyl transferase	2	-0.66	0.223	0.09	0.998	2.7	4.79e-05	1.11	0.219
XF37_02150	L-threonine 3-dehydrogenase	2	-1.26	0.00366	-0.15	0.998	-0.85	0.214	-0.29	1
XF37_02155	2-amino-3-ketobutyrate CoA ligase	2	-1.21	2.67e-06	-0.27	0.836	-0.83	0.196	-0.03	1
XF37_02160	hypothetical protein	2	-2.17	2.57e-05	0.42	0.96	-1.14	0.0471	-0.17	1
XF37_02170	ADP-heptose--LPS heptosyltransferase	2	-1.57	1.03e-05	0.2	0.995	-0.38	0.688	0.28	1
XF37_02175	ADP-heptose--LPS heptosyltransferase	2	-2.26	5.48e-06	-0.1	0.998	-0.24	0.777	-0.17	1
XF37_02180	ligase	3	-3.26	1.47e-09	0.22	0.998	-1.5	0.03	0.18	1
XF37_02185	lipopolysaccharide 1,2-N-acetylglucosaminetransferase	2	-1.68	2.86e-06	0.18	0.998	-0.89	0.142	-0.24	1
XF37_02190	glucosyltransferase	2	-2.7	1.35e-07	0.79	0.485	-1.22	0.0661	-0.1	1
XF37_02195	lipopolysaccharide biosynthesis protein	3	-2.3	1.76e-05	0.86	0.562	-1.47	0.0125	-0.23	1
XF37_02200	lipopolysaccharide 1,3-galactosyltransferase	2	-2.53	2.74e-05	0.48	0.966	-1.57	0.00751	-0.11	1
XF37_02205	heptose kinase	2	-1.36	0.00164	-0.1	0.998	-0.45	0.661	-0.04	1
XF37_02230	formamidopyrimidine-DNA glycosylase	2	-1.09	0.0195	-0.02	0.998	-0.22	0.823	-0.27	1
XF37_02240	50S ribosomal protein L28	2	-1.35	2.7e-05	0.54	0.531	-0.19	0.861	0.42	0.988
XF37_02265	orotate phosphoribosyltransferase	2	-1.51	0.00216	0.07	0.998	0.41	0.723	0.25	1
XF37_02270	ribonuclease PH	2	-1.84	0.000126	-0.42	0.969	0.6	0.474	-0.03	1
XF37_02390	Shiga toxin subunit B	5	1.45	5.54e-06	-0.36	0.756	-0.64	0.463	-0.15	1
XF37_02395	hypothetical protein	2	-2.67	0.00228	1.24	0.643	0.26	0.901	-0.4	1
XF37_02425	type VI secretion system Vgr family protein	3	-4.44	4.63e-06	3.58	0.0037	0.34	0.779	-1.07	0.467
XF37_02435	hypothetical protein	2	-2.21	0.0041	-1.83	0.286	-0.05	0.972	-0.99	0.469
XF37_02440	multidrug transporter	2	-1.33	0.00108	0.71	0.554	-0.07	0.964	-1.04	0.457
XF37_02465	transcriptional regulator	1	0.42	0.41	-0.43	0.976	-2.34	0.000191	-0.27	1
XF37_02495	hypothetical protein	2	-1.33	0.000424	0.61	0.617	-0.31	0.716	1.12	0.167
XF37_02505	NA	6	4.56	1.5e-06	-0.25	0.998	5.38	5.08e-07	-0.17	1
XF37_02520	cytochrome C peroxidase	2	-1.82	0.000129	0.23	0.998	-0.33	0.771	-0.13	1
XF37_02525	trehalase	5	1.93	1.54e-06	0.63	0.383	-0.47	0.553	0.28	1
XF37_02540	membrane protein	5	1.19	0.0149	0.36	0.976	-0.83	0.488	-0.03	1
XF37_02545	transporter	4	3.04	2.86e-06	-0.05	0.998	3.48	3.28e-06	-0.41	1
XF37_02550	hypothetical protein	5	1.49	5.54e-05	-0.03	0.998	-0.66	0.446	-0.03	1
XF37_02555	c-di-GMP phosphodiesterase	1	-2.6	6.3e-05	-0.49	0.981	-1.06	0.178	1.11	0.293
XF37_02570	hypothetical protein	2	-0.64	0.0661	0.01	0.998	1.07	0.0495	0.11	1
XF37_02575	C4-dicarboxylate transporter	2	-2.18	9.21e-11	-0.22	0.887	-1.18	0.13	0.22	1
XF37_02585	cellulose synthase	5	1.27	0.000492	0.03	0.998	-0.34	0.647	-0.2	1
XF37_02595	cellulose synthase	2	-1.61	0.0185	-0.14	0.998	0.13	0.93	-0.32	1
XF37_02625	membrane protein	3	-2.11	3.05e-05	0.61	0.806	0.08	0.961	-1.85	0.0635
XF37_02630	membrane protein	2	-1.5	0.000838	-0.1	0.998	-0.63	0.313	-0.4	0.948
XF37_02635	small toxic polypeptide ldrD	5	1.29	0.0209	0.2	0.998	-0.64	0.645	-0.74	0.888
XF37_02640	hypothetical protein	4	1.73	0.0138	-1.37	0.294	1.61	0.0195	0.88	0.387
XF37_02645	transporter	2	-2.7	4.12e-07	0.05	0.998	0.47	0.587	0.68	0.684
XF37_02665	peptide transporter	2	0.13	0.834	0.15	0.998	1.77	0.00406	-0.39	0.995
XF37_02675	peptide ABC transporter substrate-binding protein	4	1.84	1.06e-09	0.1	0.991	1.08	0.155	-0.27	1
XF37_02690	phosphoethanolamine transferase	2	0.04	0.889	0.17	0.989	1.38	0.0386	0.05	1
XF37_02710	long polar fimbrial chaperone LpfB	3	-3.17	0.00206	1.52	0.614	-0.77	0.538	-0.18	1
XF37_02715	long polar fimbrial protein LpfA	3	-2.7	0.00506	0.71	0.979	-1.62	0.0655	1.03	0.497
XF37_02725	hypothetical protein	1	-1.68	0.00065	-0.25	0.998	-1.54	0.0219	0.48	0.912
XF37_02780	hypothetical protein	2	-2.06	6.88e-10	0.62	0.172	-1.28	0.0144	0.6	0.654
XF37_02785	TonB-dependent receptor	2	-1.83	0.000296	0.58	0.858	-0.7	0.323	0.35	1
XF37_02790	colanic acid/biofilm transcriptional regulator	5	1.06	0.0116	0.22	0.998	0.06	0.969	0.4	1
XF37_02805	membrane protein	4	1.02	0.0211	-0.19	0.998	1.11	0.152	-0.06	1
XF37_02820	hypothetical protein	4	1.99	0.000149	-0.27	0.997	0.84	0.176	0.04	1
XF37_02825	gamma-aminobutyraldehyde dehydrogenase	5	1.58	0.00194	-0.15	0.998	0.09	0.942	-0.37	1
XF37_02830	spermidine/putrescine ABC transporter permease	5	1.54	5.79e-05	-0.33	0.94	0.22	0.839	-0.56	0.887
XF37_02835	spermidine/putrescine ABC transporter permease	5	1.49	0.000147	-0.33	0.944	-0.02	0.987	-0.35	1
XF37_02840	polyamine ABC transporter ATP-binding protein	5	1.69	1.02e-05	-0.63	0.504	-0.39	0.662	-0.16	1
XF37_02845	spermidine/putrescine ABC transporter substrate-binding protein	5	2.41	3.63e-10	-0.33	0.714	-0.16	0.853	-0.6	0.61
XF37_02850	GntR family transcriptional regulator	2	-1.17	0.00153	-0.06	0.998	0.22	0.871	-0.41	1
XF37_02865	hypothetical protein	2	1.19	0.0421	0.83	0.637	1.36	0.0307	0.27	1
XF37_02870	protease	2	-2.15	3.13e-05	-0.25	0.998	0.69	0.359	0.06	1
XF37_02890	tellurite resistance protein TehB	2	-1.17	0.0116	-0.08	0.998	-0.09	0.96	-0.92	0.722
XF37_02900	acetyltransferase	5	1.27	0.012	0.57	0.838	-0.95	0.166	0.28	1
XF37_02910	hypothetical protein	5	3.02	2.85e-12	-0.08	0.998	-1.36	0.0778	-1.31	0.252
XF37_02920	glucan biosynthesis protein D	2	-1.27	4.3e-05	0.06	0.998	-0.17	0.865	0.38	0.997
XF37_02955	glyceraldehyde-3-phosphate dehydrogenase	2	0.01	0.986	1.31	0.0025	0.06	0.957	-0.34	1
XF37_02960	aldehyde dehydrogenase	5	2.32	4.54e-13	-0.37	0.169	0.04	0.977	-0.62	0.813
XF37_02965	hypothetical protein	5	1.99	5.86e-08	-0.32	0.852	0.06	0.969	0.83	0.666
XF37_02975	hypothetical protein	3	-4.87	1.76e-06	2.68	0.0944	0.2	0.912	-0.46	1
XF37_02985	hypothetical protein	3	-2.91	4.56e-05	1.35	0.428	-1.5	0.0633	1.29	0.203
XF37_02995	FMN-dependent NADH-azoreductase	1	2.97	1.88e-07	1.28	0.0362	0.81	0.424	2.91	0.00254
XF37_03010	hypothetical protein	1	-1.67	0.0466	-0.72	0.958	-0.11	0.969	2.43	0.189
XF37_03020	hypothetical protein	2	-1.37	0.000514	0.07	0.998	0.27	0.787	0.2	1
XF37_03045	hypothetical protein	2	-1.83	0.0163	1.68	0.333	-0.37	0.705	-1	0.306
XF37_03080	universal stress protein F	5	1.6	5.88e-08	-0.36	0.558	-1.48	0.00704	-0.36	0.996
XF37_03085	tRNA 2-thiocytidine biosynthesis protein TtcA	2	-1.3	0.000399	-0.11	0.998	0.39	0.658	0.18	1
XF37_03095	hypothetical protein	5	2.73	8.42e-08	0.15	0.998	0.15	0.898	0.45	0.968
XF37_03120	transcriptional regulator	4	1.2	0.003	-0.01	0.998	1.46	0.0286	-1.03	0.339
XF37_03145	hypothetical protein	2	0.83	0.0275	-0.24	0.991	1.87	0.00477	-0.35	1
XF37_03155	universal stress protein UspE	5	1.09	1.93e-06	0.11	0.987	-0.83	0.203	-0.31	1
XF37_03160	hypothetical protein	5	1.01	0.00997	0.01	0.998	-0.65	0.359	0.04	1
XF37_03170	peptide ABC transporter substrate-binding protein	2	-1.11	0.00063	0.13	0.998	0	0.999	0.21	1
XF37_03190	dienelactone hydrolase	2	-1.36	0.00373	-0.56	0.889	-0.57	0.437	0.17	1
XF37_03195	carboxymethylenebutenolidase	2	-2.42	2.69e-05	0.05	0.998	-0.43	0.627	-0.32	1
XF37_03230	hypothetical protein	5	1.22	1.11e-06	-0.09	0.998	0.04	0.977	0.24	1
XF37_03235	LacI family transcriptional regulator	2	-1.2	0.0188	-0.33	0.998	0.39	0.728	-0.58	0.921
XF37_03310	phage-shock protein	1	3.18	2.83e-06	2.57	0.000229	0.45	0.656	2.69	0.00169	Phage shock protein (psp) operon
XF37_03315	transcriptional regulator	1	2.92	7.41e-07	2.68	2.07e-05	0.46	0.645	2.82	0.001
XF37_03320	phage shock protein	1	2.91	3.97e-07	2.52	2.54e-05	0.42	0.667	3.03	0.000251
XF37_03325	phage shock protein	1	3.09	1.96e-11	2.73	1.31e-08	1.07	0.187	3.1	0.000318
XF37_03335	4-aminobutyrate aminotransferase	5	2.25	3.91e-09	-0.35	0.734	-0.21	0.817	-0.48	0.909
XF37_03340	gamma-glutamylputrescine oxidoreductase	5	3.31	5.45e-10	-0.34	0.865	-0.23	0.841	0.24	1
XF37_03345	aldehyde dehydrogenase	5	3.78	4.52e-13	-0.3	0.748	0.38	0.765	-0.07	1
XF37_03350	transcriptional regulator	5	4.2	1.26e-11	-0.33	0.844	0.91	0.314	0.16	1
XF37_03355	gamma-glutamyl-gamma-aminobutyrate hydrolase	5	4.48	1.78e-14	-0.31	0.671	1.16	0.0935	0.23	1
XF37_03360	gamma-glutamylputrescine synthetase	5	5.92	7.83e-15	-0.25	0.852	1.48	0.0151	-0.11	1
XF37_03365	Putrescine importer PuuP	5	4.12	1.71e-08	-0.33	0.976	0.7	0.381	0.43	0.98
XF37_03405	major facilitator transporter	5	1.05	0.0332	-0.25	0.998	-0.55	0.544	0.63	0.81
XF37_03430	enoyl-ACP reductase	2	-1.08	1.05e-05	0.2	0.944	0.13	0.898	0.06	1
XF37_03435	hypothetical protein	4	1.75	7.48e-10	-0.21	0.857	1.35	0.053	0.54	0.887
XF37_03440	exoribonuclease II	2	-1.78	1.14e-08	0.16	0.983	1.14	0.266	0.47	1
XF37_03445	RNase II stability modulator	1	-0.14	0.522	0.08	0.998	-1.29	0.0338	-0.31	1
XF37_03455	DeoR faimly transcriptional regulator	2	-1.51	0.0244	0.67	0.942	0.95	0.192	0.21	1
XF37_03460	lipoprotein	5	1.03	0.000137	0.55	0.226	-0.97	0.149	0.77	0.533
XF37_03465	translation initiation factor Sui1	2	-3.45	5.27e-07	0.22	0.998	-0.64	0.405	0.67	0.633
XF37_03470	orotidine 5'-phosphate decarboxylase	2	-2.5	1.46e-05	-0.22	0.998	0.25	0.806	0.59	0.813
XF37_03480	membrane protein	5	1.2	0.000143	-0.36	0.834	0.21	0.83	0	1
XF37_03495	aconitate hydratase	5	1.09	3.02e-06	0.03	0.998	-0.52	0.646	0.23	1
XF37_03575	hypothetical protein	4	0.12	0.542	-0.52	0.198	4.94	5.62e-10	-0.94	0.346	Tryptophan synthesis (trp) operon
XF37_03580	glutamine amidotransferase	4	3.43	5.18e-14	-0.44	0.305	4	3.17e-06	-1.03	0.523
XF37_03585	indole-3-glycerol phosphate synthase	4	3.99	8.49e-17	-0.42	0.112	2.63	7.07e-05	-0.86	0.485
XF37_03590	tryptophan synthase subunit beta	4	3.17	3.47e-14	-0.5	0.161	2.69	4.22e-05	-1.13	0.224
XF37_03595	tryptophan synthase subunit alpha	4	3.32	1.2e-08	-0.54	0.716	2.66	0.000553	-1.06	0.482
XF37_03600	hypothetical protein	1	1.42	0.000226	2.07	0.000126	-1.27	0.0746	0.86	0.494
XF37_03605	hypothetical protein	1	0.51	0.114	2.02	8.87e-05	-1.26	0.116	0.77	0.696
XF37_03610	hypothetical protein	1	0.82	0.0374	1.62	0.00801	-1.05	0.0909	0.87	0.402
XF37_03635	phage tail protein	4	1.58	0.0259	-0.54	0.98	0.46	0.724	0.21	1
XF37_03650	antirepressor	5	1.92	5.2e-05	-0.26	0.989	0.55	0.695	0.45	1
XF37_03675	hypothetical protein	3	-4.41	7.19e-05	1.9	0.44	-0.16	0.913	-0.05	1
XF37_03705	antitermination protein	4	-0.23	0.783	-2.47	0.0833	-1.29	0.0661	-2.12	0.0314
XF37_03715	lysozyme	5	1.23	0.0149	-1.24	0.17	0.59	0.536	-0.45	0.965
XF37_03720	endopeptidase	5	1.46	0.0224	0.05	0.998	-0.94	0.539	1.61	0.395
XF37_03775	NA	1	-0.12	0.831	1.84	0.0314	-2.71	0.00456	0.61	1
XF37_03790	terminase	2	-0.54	0.604	1.67	0.476	2.14	0.0143	-0.82	0.776
XF37_03800	ABC transporter permease	1	-0.5	0.212	-0.1	0.998	-1.19	0.0287	-0.16	1
XF37_03805	hypothetical protein	1	-1.49	0.0112	0.33	0.998	-2.48	0.0312	-0.09	1
XF37_03810	long-chain fatty acid outer membrane transporter	1	0.9	1.16e-05	-0.24	0.667	-1.79	0.00346	0.15	1
XF37_03815	hypothetical protein	2	-1.37	0.00766	-0.63	0.867	0.98	0.36	-0.25	1
XF37_03820	3-ketoacyl-CoA thiolase	5	2.06	4.02e-08	-0.2	0.981	-1.38	0.0342	0.21	1
XF37_03825	multifunctional fatty acid oxidation complex subunit alpha	5	1.53	2.1e-06	-0.26	0.864	-1.02	0.155	-0.14	1
XF37_03885	SAM-dependent methyltransferase	2	-1.76	1.97e-05	-0.34	0.964	0.87	0.248	0.09	1
XF37_03895	murein endopeptidase	2	-1.3	0.00545	-0.06	0.998	-0.03	0.977	0.17	1
XF37_03900	hypothetical protein	2	-1.97	9.16e-06	-0.11	0.998	-0.39	0.651	-0.38	1
XF37_03920	3-oxoacyl-ACP synthase	2	-0.81	0.000174	0.11	0.998	2.86	0.000111	0.02	1
XF37_03925	transporter	2	-1.31	0.0362	0.08	0.998	1.27	0.0483	0.44	0.939
XF37_03930	flagella biosynthesis regulator	2	-1.13	0.00549	-0.47	0.923	0.49	0.579	0.23	1
XF37_03970	colicin V production protein	4	0.59	0.104	0.02	0.998	2.19	0.000794	-0.77	0.608
XF37_03985	histidine ABC transporter substrate-binding protein HisJ	4	2.71	4.54e-13	-0.38	0.302	2.09	0.000774	-1.71	0.0242
XF37_03990	histidine ABC transporter substrate-binding protein HisJ	4	1.62	4.5e-08	-0.49	0.336	1.86	7.43e-05	-1.4	0.0147
XF37_03995	amino acid ABC transporter permease	4	1.66	1.32e-05	-0.77	0.342	2.05	0.000896	-1.49	0.0696
XF37_04005	amino acid transporter	2	0.4	0.325	-0.07	0.998	1.52	0.0325	-1.41	0.156
XF37_04045	hypothetical protein	2	-1.83	0.0451	-0.35	0.998	0.95	0.168	-0.58	0.711
XF37_04050	phosphate acetyltransferase	2	-1.78	6.36e-07	0.15	0.998	-0.39	0.696	0.18	1
XF37_04055	acetate kinase	2	-1.48	6.07e-06	0.25	0.944	-0.37	0.702	-0.03	1
XF37_04065	hypothetical protein	5	1.31	0.00473	0.55	0.8	-1.07	0.0693	0.1	1
XF37_04090	aminotransferase	2	-0.85	0.00289	-0.3	0.923	1.23	0.0344	-0.31	1
XF37_04095	transcriptional regulator	2	-1.01	0.00914	0.09	0.998	0.18	0.898	-0.17	1
XF37_04105	NADH dehydrogenase	2	-1.31	3.34e-06	-0.09	0.998	-0.12	0.913	-0.53	0.848	NADH dehydrogenase A/B gene cluster (NADH A/B)
XF37_04110	NADH:ubiquinone oxidoreductase	2	-1.21	1.81e-07	-0.16	0.94	-0.61	0.598	-0.15	1
XF37_04115	NADH dehydrogenase	2	-1.27	7.7e-07	-0.27	0.789	-0.87	0.352	-0.07	1
XF37_04175	deubiquitinase	3	-3.24	1.47e-07	1.13	0.336	-1.04	0.153	-0.16	1
XF37_04180	ribonuclease Z	2	-1.64	0.00122	0.51	0.929	0.26	0.878	0.41	1
XF37_04190	protein ElaB	5	1.89	6.76e-10	0.23	0.734	-0.5	0.545	0.49	0.888
XF37_04215	O-succinylbenzoate synthase	2	-1.03	0.0051	-0.07	0.998	0.03	0.984	0.07	1
XF37_04220	O-succinylbenzoic acid--CoA ligase	2	-1.41	0.0202	-0.15	0.998	0.44	0.654	-0.25	1
XF37_04235	4-amino-4-deoxy-L-arabinose-phospho-UDP flippase	5	1.11	0.0187	-0.06	0.998	-0.1	0.941	0.6	0.86
XF37_04255	UDP phosphate 4-deoxy-4-formamido-L-arabinose transferase	2	-1.04	0.00275	0.25	0.976	0.27	0.823	0.34	1
XF37_04265	heptose kinase	2	-1.2	0.00101	0.45	0.838	1.8	0.0188	0.09	1
XF37_04285	IclR family transcriptional regulator	5	2.15	2.08e-05	-0.55	0.789	0.23	0.853	-0.43	0.98
XF37_04290	rhamnonate dehydratase	5	1.73	0.000142	-0.3	0.981	0.7	0.5	-0.8	0.693
XF37_04300	endopeptidase	4	0.57	0.473	-1.25	0.693	0.44	0.619	-1.92	0.00732
XF37_04320	hypothetical protein	1	-2.1	0.00452	-0.73	0.919	0.45	0.627	0.37	0.996
XF37_04335	xanthine dehydrogenase	5	2.04	2.65e-06	0.54	0.602	0.1	0.95	0.71	0.878
XF37_04340	hypothetical protein	5	1.5	0.00623	0.2	0.998	0.31	0.805	0.7	0.841
XF37_04365	oxidoreductase	4	0.35	0.502	-3.51	0.000126	-0.91	0.228	-0.09	1
XF37_04370	LysR family transcriptional regulator	2	0.34	0.509	-0.17	0.998	1.33	0.0352	-0.25	1
XF37_04375	hypothetical protein	3	-4.6	3.59e-09	1.05	0.557	-1.68	0.0248	0.77	0.685
XF37_04400	hypothetical protein	2	-2.05	0.034	-0.27	0.998	-0.59	0.523	-1.06	0.44
XF37_04420	hypothetical protein	5	1.46	0.00546	0.18	0.998	-0.81	0.213	0.5	0.833
XF37_04455	hypothetical protein	1	-1.24	0.0454	-1.67	0.18	-0.24	0.899	-0.02	1
XF37_04460	integrase	2	-1.04	0.0107	-0.39	0.969	-1.17	0.115	-0.29	1
XF37_04475	AraC family transcriptional regulator	3	-1.69	0.000598	-1.35	0.305	-1.49	0.149	0.12	1
XF37_04480	hypothetical protein	2	-2.09	1.33e-05	0.08	0.998	0.02	0.991	-0.03	1
XF37_04490	tail fiber protein	3	-2.19	3.76e-05	1.38	0.142	-0.68	0.55	0.33	1
XF37_04525	hypothetical protein	3	-1.17	0.0255	1.13	0.343	-3.48	0.000102	2.96	0.00339
XF37_04535	potassium-transporting ATPase subunit A	3	-2.31	0.0096	2.06	0.305	1.05	0.0932	0.26	1
XF37_04565	ornithine decarboxylase	2	-3.25	1.45e-09	0.2	0.998	0.87	0.223	-0.37	1
XF37_04570	putrescine transporter	1	-1.83	1.22e-05	-0.99	0.343	-0.21	0.841	0.32	1
XF37_04590	LexA regulated protein	2	-1.1	0.0136	-0.07	0.998	1.85	0.00955	-0.45	0.996
XF37_04625	porin	5	1.03	0.0226	0.3	0.988	0.12	0.924	-0.24	1
XF37_04630	glutamate--tRNA ligase	2	-1.25	0.000116	-0.08	0.998	0.75	0.377	0.17	1
XF37_04665	NA	4	1.11	0.0217	-0.51	0.919	3.41	6.74e-05	0.13	1
XF37_04680	NA	2	-1.58	0.042	1.7	0.328	2.1	0.0101	-1.46	0.296
XF37_04700	2-octaprenyl-3-methyl-6-methoxy-1,4-benzoquinol hydroxylase	5	1.13	0.000372	-0.17	0.998	-1.35	0.0583	0.26	1
XF37_04705	(dimethylallyl)adenosine tRNA methylthiotransferase	2	-1.81	1.15e-06	0.2	0.991	0.6	0.534	-0.14	1
XF37_04720	magnesium/cobalt efflux protein CorC	2	-1.29	0.000105	-0.01	0.998	-0.18	0.849	-0.31	1
XF37_04725	apolipoprotein acyltransferase	2	-2.09	5.52e-06	0.04	0.998	0.06	0.957	0.41	0.984
XF37_04730	amino acid transporter	5	2.14	6.35e-12	0.02	0.998	-0.09	0.957	-0.77	0.813
XF37_04735	amino acid ABC transporter permease	5	1.56	0.00135	-0.09	0.998	0.69	0.411	-0.43	1
XF37_04765	hypothetical protein	3	-4.42	2.9e-06	1.35	0.558	1.03	0.323	-1.65	0.208
XF37_04770	hypothetical protein	2	0.61	0.385	-1.42	0.44	1.77	0.0325	-0.14	1
XF37_04775	molecular chaperone DnaJ	2	-1.06	0.0308	-0.02	0.998	1.08	0.248	-0.2	1
XF37_04780	hypothetical protein	2	-1.82	0.00216	0.35	0.998	-0.7	0.691	0.9	0.909
XF37_04790	hypothetical protein	5	1.32	8.07e-06	-0.08	0.998	-0.52	0.596	-0.09	1
XF37_04795	leucine--tRNA ligase	2	-1.15	1.4e-06	0.07	0.998	0	0.998	0.06	1
XF37_04800	LPS biosynthesis protein	2	-1.1	0.0162	-0.35	0.989	-0.38	0.606	0.18	1
XF37_04805	DNA polymerase III subunit delta	2	-1.12	0.000796	0.16	0.998	-0.3	0.722	-0.31	1
XF37_04825	50S rRNA methyltransferase	2	-1.47	0.000725	0.33	0.981	1.36	0.0663	0.26	1
XF37_04830	penicillin-binding protein 2	2	-1.76	1.77e-05	0.28	0.981	0.2	0.863	0.26	1
XF37_04845	D-alanyl-D-alanine carboxypeptidase	2	-1.79	7.45e-07	0.21	0.986	-0.6	0.458	0.2	1
XF37_04850	hypothetical protein	5	1.05	0.000766	0.51	0.553	-0.67	0.367	0.21	1
XF37_04865	LysR family transcriptional regulator	2	-2.18	0.00355	0.91	0.843	-0.16	0.876	-0.18	1
XF37_04895	phospholipid:lipid A palmitoyltransferase	1	0.02	0.946	0.23	0.989	-2.14	0.000263	-0.18	1
XF37_04900	C4-dicarboxylate transporter	2	-1.94	0.00368	-0.99	0.77	0.65	0.645	-0.59	0.984
XF37_04905	two-component response regulator DpiA	4	-1.1	0.0319	-0.71	0.84	1.02	0.192	-1.3	0.151
XF37_04930	citrate lyase subunit alpha	2	-3.03	0.00017	-0.04	0.998	0.79	0.53	-0.55	1
XF37_04955	nucleoside diphosphate kinase regulator	2	-1.01	0.0094	0.14	0.998	0.04	0.969	-0.02	1
XF37_04960	hypothetical protein	3	-3.51	5.12e-05	4.88	0.000126	-0.21	0.864	-0.31	1
XF37_04965	alcohol dehydrogenase	5	2.58	5.15e-10	0.84	0.0362	0.26	0.775	1.37	0.049
XF37_04970	universal stress protein UspG	1	0.57	0.0394	-0.28	0.933	-2.2	7.88e-05	0.11	1
XF37_04980	alkyl hydroperoxide reductase	2	0.29	0.15	0.17	0.935	0.67	0.317	1.95	0.0034
XF37_04985	disulfide isomerase	1	-1.98	0.000335	0.18	0.998	-1.7	0.0122	0.14	1
XF37_04990	LysR family transcriptional regulator	3	-3.08	0.00247	0.9	0.944	0.22	0.915	1.17	0.613
XF37_05005	methionine aminotransferase	5	5.36	2.32e-10	-1.01	0.222	3.16	0.0001	1.56	0.122
XF37_05010	oxidoreductase	5	4.76	5.58e-09	-0.71	0.622	2.86	0.000312	1.02	0.475
XF37_05015	hypothetical protein	5	3.53	7.84e-09	0.15	0.998	-0.25	0.809	-1.28	0.178
XF37_05020	carbon starvation protein A	5	2.42	4.85e-10	-0.17	0.976	-0.69	0.393	-0.72	0.696
XF37_05025	thioesterase	1	-1.89	0.00529	-0.07	0.998	-1.61	0.0185	0.54	0.913	Enterobactin biosynthesis (ent) locus
XF37_05030	2,3-dihydroxybenzoate-2,3-dehydrogenase	3	-2.79	2.56e-06	0.63	0.852	-2.63	0.000144	1.28	0.222
XF37_05035	isochorismatase	3	-2.75	3.57e-06	0.29	0.998	-3.1	1.42e-06	0.37	1
XF37_05040	enterobactin synthase subunit E	3	-2.84	3.48e-05	0.77	0.845	-2.36	3.54e-05	0.51	0.848
XF37_05045	isochorismate synthase	3	-2.4	0.000535	0.99	0.717	-1.86	0.000432	1.2	0.0993
XF37_05050	iron-enterobactin ABC transporter substrate-binding protein	1	-0.41	0.439	0.96	0.526	-1.49	0.00631	0.88	0.336
XF37_05055	enterobactin exporter EntS	2	-1.49	0.0394	0.26	0.998	-0.67	0.529	1.06	0.507
XF37_05060	iron-enterobactin transporter membrane protein	4	1.64	0.00777	0.27	0.998	0.67	0.352	0.96	0.311
XF37_05065	iron-enterobactin transporter permease	2	-1.42	0.0135	-0.1	0.998	-0.12	0.923	0.27	1
XF37_05070	iron-enterobactin transporter ATP-binding protein	2	-1.75	0.0182	-0.14	0.998	-0.58	0.483	0.57	0.813
XF37_05075	O-antigen length regulator	1	-2.19	0.000733	-2.36	0.0426	0.62	0.412	0.39	0.943
XF37_05080	enterobactin synthase subunit F	3	-2.07	1.89e-05	0.33	0.981	-2.61	0.000396	0.49	0.991
XF37_05085	hypothetical protein	3	-4.67	4.03e-09	3.68	0.000253	-2.19	0.0155	-0.71	0.9
XF37_05090	enterobactin esterase	3	-2.25	0.000791	1.77	0.161	-2.07	0.00457	0.62	0.903
XF37_05095	outer membrane receptor protein	2	-1.52	0.00226	0.41	0.976	-0.7	0.527	0.59	0.968
XF37_05125	gamma-glutamyl ligase	5	1.44	8.17e-06	0.33	0.829	-0.56	0.561	0.24	1
XF37_05150	aromatic amino acid transporter	2	-1.71	1.77e-05	0.36	0.931	0.25	0.893	0.05	1
XF37_05160	copper resistance protein	2	-1.87	0.0142	-0.2	0.998	1.07	0.437	-0.41	1
XF37_05165	copper-binding protein	2	-2.62	0.00282	-1.68	0.494	0.44	0.77	-0.83	0.912
XF37_05170	copper transporter	2	-1.28	0.0288	0.5	0.975	1.62	0.0138	-0.3	1
XF37_05195	hydrolase	3	-3.06	1.07e-08	0.23	0.998	-1.57	0.0138	0.06	1
XF37_05200	protease	3	-2.9	1.87e-08	-0.29	0.983	-2.29	7.15e-05	-0.87	0.404
XF37_05220	tail protein	4	0.3	0.637	-2.78	0.00543	0.76	0.416	0.49	0.939
XF37_05235	ATPase	1	-0.14	0.839	-1.89	0.104	-2.81	0.00303	1.41	0.338
XF37_05250	recombinase	3	-3.53	0.00167	0.29	0.998	-3.22	0.00218	0.21	1
XF37_05255	integrase	3	-1.75	0.000111	0.65	0.677	-1.75	0.0227	-1.21	0.307
XF37_05260	DNA-binding protein	3	-2.29	3.69e-05	0.47	0.954	-2.09	0.00243	-0.07	1
XF37_05265	hypothetical protein	3	-4.09	0.000145	2.17	0.284	-1.5	0.111	1.7	0.159
XF37_05270	hypothetical protein	2	-2.03	0.0447	0.82	0.952	-0.11	0.933	0.77	0.583
XF37_05275	hypothetical protein	2	-2.11	2.74e-05	0.55	0.862	-1.45	0.0282	0.23	1
XF37_05290	host specificity protein J	1	-0.99	0.294	-0.14	0.998	-1.33	0.166	2.36	0.0151
XF37_05350	hypothetical protein	5	4.96	8.49e-17	0.52	0.0944	-0.86	0.424	1.02	0.554
XF37_05355	damage-inducible protein	2	-1.26	0.00113	0.11	0.998	-0.41	0.645	0.15	1
XF37_05360	LexA repressor	5	1.11	5.52e-05	-0.18	0.981	-0.62	0.507	-0.03	1
XF37_05370	glycerol-3-phosphate acyltransferase	2	-1.39	1.1e-05	0.13	0.998	0.57	0.568	-0.08	1
XF37_05385	pentapeptide repeats family protein	3	-3.32	1.85e-05	-0.09	0.998	-0.77	0.545	1.4	0.285
XF37_05390	maltose-binding protein	3	-2.65	2.34e-09	0.2	0.989	-2.22	0.000236	-0.52	0.884
XF37_05395	maltoporin	3	-3.02	1.15e-12	0	0.999	-1.86	0.00208	-1.93	0.0147
XF37_05400	maltose/maltodextrin transporter ATP-binding protein	3	-2.97	1.77e-11	0.05	0.998	-2.67	0.00602	-2.96	0.0144
XF37_05410	sugar ABC transporter substrate-binding protein	3	-2.58	2.1e-12	0.15	0.962	-2.36	1.65e-05	-1.14	0.134
XF37_05415	maltose transporter membrane protein	3	-2.97	1.31e-06	0.12	0.998	-1.74	0.00237	-0.71	0.604
XF37_05420	maltose transporter permease	2	-2.19	1.67e-06	-0.13	0.998	-0.8	0.329	-0.09	1
XF37_05425	D-xylose transporter XylE	2	-0.05	0.932	-0.69	0.858	1.16	0.134	-2.22	0.00581
XF37_05430	phosphate-starvation-inducible protein PsiE	5	2.86	1.61e-06	0.66	0.616	1.5	0.0779	0.77	0.81
XF37_05435	hypothetical protein	5	1.83	0.0436	-1.46	0.494	0.42	0.762	-1.4	0.416
XF37_05440	hypothetical protein	5	1.86	0.0113	0.91	0.717	0.06	0.961	0.63	0.694
XF37_05450	hypothetical protein	2	-0.12	0.831	-0.9	0.665	2.01	0.0437	0.7	0.9
XF37_05460	hypothetical protein	5	1.5	3.94e-07	-0.11	0.998	-0.76	0.242	0.47	0.903
XF37_05470	aspartate kinase	4	1.41	0.000977	-0.16	0.998	6.28	2.45e-12	-1.6	0.0326
XF37_05480	23S rRNA pseudouridylate synthase	2	-1.03	0.02	-0.36	0.981	0.26	0.781	-0.43	0.956
XF37_05490	sorbitol-6-phosphate 2-dehydrogenase	4	-1	0.177	-1.91	0.227	1.41	0.0857	-2.67	0.00855
XF37_05500	PTS friuctose transporter subunit IIB	3	-4.21	5.21e-05	2.34	0.185	-0.21	0.903	-0.07	1
XF37_05505	PTS mannose transporter subunit IIC	2	-1.26	0.00871	0.07	0.998	-0.34	0.823	0.96	0.657
XF37_05540	transcriptional repressor IclR	4	1.13	1.81e-06	0	0.999	0.85	0.464	-0.16	1
XF37_05545	ankyrin	3	-2.92	8.56e-05	2.19	0.0906	-1.53	0.203	1.97	0.149
XF37_05550	hypothetical protein	2	-2.8	0.00506	0.18	0.998	0.35	0.783	-1.79	0.137
XF37_05555	isocitrate dehydrogenase	5	4.89	3.53e-12	-0.33	0.843	1.87	0.046	-0.33	1
XF37_05560	isocitrate lyase	4	4.24	1.42e-15	-0.23	0.779	2.04	0.000901	-0.33	1
XF37_05565	malate synthase	5	5.05	4.65e-16	-0.17	0.942	2.12	0.00648	-0.47	0.992
XF37_05570	homoserine O-succinyltransferase	5	4.25	1.47e-08	-0.44	0.909	3.55	3.43e-06	0.66	0.786
XF37_05590	tail protein	2	-0.79	0.29	-0.19	0.998	0.64	0.559	-2.44	0.0126
XF37_05605	recombinase RecA	2	-2.11	0.0217	-0.15	0.998	0.49	0.753	0.05	1
XF37_05625	terminase	4	2.95	0.00449	0.64	0.979	4.37	0.00665	0.28	1
XF37_05650	transposase	4	0.76	0.194	-2.73	0.0037	1.29	0.15	-0.56	0.921
XF37_05665	integrase	2	-1.05	0.0162	-0.49	0.928	-0.59	0.399	-0.29	1
XF37_05680	DNA-binding protein	2	-1.85	0.0401	0.76	0.95	-0.3	0.901	0.28	1
XF37_05685	phage protein	3	-2.42	0.000856	1.15	0.627	-1.34	0.0478	1.29	0.161
XF37_05690	iroE	2	-3.11	3.36e-08	0.71	0.646	-0.92	0.517	0.39	1
XF37_05735	porin	2	-2.5	0.00294	-0.72	0.956	3.93	5.07e-08	-0.53	0.853
XF37_05750	xanthine-guanine phosphoribosyltransferase	2	-2.21	3.6e-05	-0.52	0.948	0.19	0.876	-0.05	1
XF37_05760	peptide chain release factor-like protein	1	-0.86	0.373	2.26	0.243	-2.03	0.0281	0.91	0.745
XF37_05770	acyltransferase	2	-2.26	0.0219	0.02	0.998	0.77	0.359	-0.34	1
XF37_05795	flagellar biosynthesis protein FlhA	5	1.33	0.0417	-0.3	0.998	0.31	0.807	-0.28	1
XF37_05810	antitoxin DinJ	5	1.84	2.48e-09	0.14	0.976	-0.58	0.605	0.33	1
XF37_05815	addiction module toxin, RelE/StbE family protein	5	1.03	0.000766	-0.71	0.308	0.39	0.639	0.13	1
XF37_05820	transpeptidase	2	-1.38	0.000472	-0.05	0.998	1.11	0.0555	-0.32	1
XF37_05835	acyl-CoA dehydrogenase	5	3.35	4.19e-15	-0.19	0.83	-1.12	0.127	0.7	0.702
XF37_05845	carbon-nitrogen hydrolase	5	1.53	0.0046	-0.07	0.998	0.12	0.911	0.46	0.912
XF37_05850	H repeat-associated protein YdcC	3	-2.54	0.000752	1.51	0.417	-0.19	0.855	1.01	0.197
XF37_05855	dCTP deaminase	2	-2.39	1.06e-05	0.46	0.944	-0.68	0.539	-0.47	0.997
XF37_05860	hypothetical protein	3	-3.69	2.42e-06	0.9	0.717	0.3	0.864	-0.3	1
XF37_05865	type IV secretion protein Rhs	2	-1.12	0.0218	-0.09	0.998	0.69	0.374	0.05	1
XF37_05895	hypothetical protein	2	-0.19	0.784	1.28	0.394	1.4	0.184	-2.27	0.0445
XF37_05930	excinuclease ABC subunit C	2	-2.42	3.11e-07	0.1	0.998	0.07	0.948	-0.22	1
XF37_05960	hypothetical protein	3	-2.56	0.000209	0.48	0.976	-2.54	0.00715	1.93	0.117
XF37_05965	hypothetical protein	3	-4.04	7.31e-10	1.85	0.0142	-2.13	0.104	2.02	0.214
XF37_05970	hypothetical protein	2	-1.06	0.0168	0.69	0.676	0.26	0.823	-0.38	1
XF37_05985	hypothetical protein	1	-2.01	0.00139	-0.28	0.998	-0.23	0.89	1.4	0.246
XF37_06020	hypothetical protein	5	1.01	0.00116	0.06	0.998	-0.37	0.724	0.02	1
XF37_06030	ABC transporter ATP-binding protein	2	-1.08	0.00218	-0.15	0.998	-0.63	0.341	0.33	1
XF37_06035	protease	5	1.03	0.000341	0.15	0.998	-1.43	0.031	0.2	1
XF37_06040	membrane protein	5	1.2	0.0095	-0.27	0.998	-1.05	0.0598	0.14	1
XF37_06050	adhesin	2	-1.93	0.00278	-0.3	0.998	3.63	3.71e-07	-1.39	0.098
XF37_06055	hypothetical protein	2	-2.05	0.000149	-0.6	0.838	3.52	2.37e-06	-1.85	0.0176
XF37_06060	hypothetical protein	1	-1.29	0.185	-1.19	0.755	-0.05	0.98	2.41	0.049
XF37_06065	transcriptional regulator	5	1.4	0.00819	-0.62	0.843	-0.71	0.344	1.2	0.126
XF37_06080	type 1 secretion target domain-containng protein	4	1.67	1.35e-05	0	0.999	1.12	0.167	-0.09	1
XF37_06085	bacterial Ig-like domain family protein	5	2.13	2.6e-12	-0.24	0.563	0.26	0.81	-0.04	1
XF37_06090	transporter	5	2.03	2.7e-11	-0.18	0.843	-0.04	0.974	-0.06	1
XF37_06095	amino acid permease	5	1.32	2.05e-06	-0.06	0.998	-0.94	0.187	-0.26	1
XF37_06100	glutaminase	5	1.2	0.000217	-0.17	0.998	-0.53	0.637	-0.3	1
XF37_06105	copper-transporting ATPase	5	1.11	6.36e-07	0.19	0.815	-0.29	0.798	0.32	1
XF37_06120	hypothetical protein	2	-1.56	0.000561	-0.23	0.998	0.63	0.399	-0.23	1
XF37_06140	guanosine kinase	2	-2.2	1.03e-07	-0.14	0.998	0.35	0.653	0.47	0.887
XF37_06180	adenine phosphoribosyltransferase	2	-2.75	3.44e-08	-0.29	0.988	1.05	0.227	0.25	1
XF37_06195	hypothetical protein	1	-1.34	0.0463	2.61	0.00562	-1.34	0.173	0.38	1
XF37_06210	multidrug transporter	2	-1.33	3.21e-06	-0.18	0.981	0	0.999	0.11	1
XF37_06230	endodeoxyribonuclease	4	-1.61	0.00622	-1.67	0.142	0.14	0.934	-2.04	0.147
XF37_06235	antiterminator	2	-3	0.00145	-1.1	0.847	0.77	0.58	-1.02	0.684
XF37_06240	NA	2	-0.41	0.288	-0.23	0.998	1.7	0.0152	0.06	1
XF37_06245	NA	2	-0.32	0.552	-1.15	0.333	1.85	0.00764	0.15	1
XF37_06265	rhsA	2	0.37	0.417	0.34	0.981	1.44	0.0138	-0.38	0.984
XF37_06300	hypothetical protein	3	-2.55	0.000797	1.14	0.68	-0.91	0.454	-1.43	0.344
XF37_06305	translation inhibitor protein RaiA	5	1.95	1.14e-09	0.33	0.503	-2.15	0.00199	-0.3	1
XF37_06325	lipoprotein	5	1.18	0.00358	0.84	0.308	-0.27	0.781	-0.23	1
XF37_06335	diguanylate cyclase	2	-1.8	0.00012	-0.14	0.998	-0.83	0.281	-0.42	1
XF37_06340	membrane protein	2	-1.55	1.21e-05	0.04	0.998	-1.04	0.128	-0.23	1
XF37_06345	50S ribosomal protein L19	2	-1.6	0.00194	0.33	0.995	-0.05	0.974	-0.67	0.911
XF37_06350	tRNA (guanine-N1)-methyltransferase	2	-1.79	3.09e-07	-0.02	0.998	-0.15	0.896	-0.18	1
XF37_06355	16S rRNA-processing protein RimM	2	-1.87	2.16e-08	-0.07	0.998	-0.17	0.876	0.03	1
XF37_06360	30S ribosomal protein S16	2	-1.11	0.000349	-0.08	0.998	0.56	0.538	0.36	1
XF37_06375	hypothetical protein	2	-2.2	3.77e-05	0.07	0.998	-0.21	0.833	0.02	1
XF37_06385	Heat shock protein GrpE	3	-1.69	0.079	0.88	0.952	-0.75	0.554	-2.66	0.0311
XF37_06405	hypothetical protein	2	-1.37	0.000153	-0.34	0.957	-0.83	0.267	0.15	1
XF37_06410	hypothetical protein	1	-1.24	0.00118	-0.86	0.453	0.05	0.971	0.25	1
XF37_06430	bfpT-regulated chaperone	2	-1.9	2.98e-05	0.32	0.981	0.91	0.107	-0.71	0.543
XF37_06435	T3SS effector protein NleG8	2	-3.04	3.21e-08	-0.3	0.993	0.67	0.445	-1.48	0.0849
XF37_06440	type III effector	3	-4.22	1.99e-09	0.84	0.629	-0.13	0.914	-1.66	0.0358
XF37_06445	hypothetical protein	3	-2.9	2.68e-05	2.52	0.02	-2.89	0.00695	2	0.168
XF37_06455	hypothetical protein	5	1.66	0.00796	-0.51	0.954	0.05	0.978	0.05	1
XF37_06480	tRNA methyltransferase	2	-2.18	0.000107	0.48	0.961	0.15	0.892	-0.26	1
XF37_06485	tRNA methyltransferase	2	-2.56	7.09e-06	-0.02	0.998	-0.41	0.689	0.09	1
XF37_06510	arginyl-tRNA synthetase	2	-1.72	1.4e-07	0.29	0.89	0.14	0.922	0.28	1
XF37_06515	hypothetical protein	1	-2.43	0.000146	-0.15	0.998	-0.92	0.305	0.03	1
XF37_06535	chemotaxis protein CheZ	2	-1.15	0.027	-0.37	0.991	-0.04	0.974	-0.11	1	Chemotaxis and motility (che-mot) operon
XF37_06540	chemotaxis protein CheY	2	-1.27	0.00457	-0.01	0.998	-0.35	0.723	0	1
XF37_06545	chemotaxis protein	2	-1.34	0.00384	-0.35	0.986	-0.27	0.805	-0.74	0.636
XF37_06550	chemotaxis protein CheR	2	-1.13	0.154	-0.59	0.989	0.86	0.265	-1.93	0.011
XF37_06555	methyl-accepting protein IV	2	-1.42	0.0025	0.03	0.998	0.06	0.957	-0.8	0.527
XF37_06560	chemotaxis protein	2	-1.91	1.36e-05	-0.04	0.998	-0.45	0.572	-0.46	0.939
XF37_06570	chemotaxis protein CheA	2	-1.73	0.000579	0.33	0.991	0.09	0.955	-0.29	1
XF37_06575	flagellar motor protein MotB	2	-1.54	0.00962	-0.06	0.998	0.1	0.948	-0.81	0.657
XF37_06580	flagellar motor protein MotA	2	-1.51	0.000587	0.18	0.998	0.28	0.81	-0.49	0.968
XF37_06585	transcriptional regulator	2	-2.52	5.03e-07	0.07	0.998	-0.72	0.341	-1.43	0.0997
XF37_06590	hypothetical protein	2	-2.57	2.67e-06	0.39	0.974	-0.18	0.857	-0.36	1
XF37_06600	trehalose-6-phosphate synthase	5	2.22	1.78e-10	0.26	0.738	0.2	0.864	0.74	0.657
XF37_06605	trehalose phosphatase	5	2.76	2.42e-13	0.45	0.138	-0.25	0.74	0.53	0.654
XF37_06610	L-arabinose transporter permease	4	3.25	9.92e-07	-0.81	0.61	2.23	0.000368	-1.5	0.0639
XF37_06615	L-arabinose transporter ATP-binding protein	4	2.7	1.38e-07	-0.65	0.576	2.49	0.000214	-1.64	0.0594
XF37_06620	sugar ABC transporter substrate-binding protein	4	3.65	3.29e-09	-1.13	0.14	3.33	6.34e-07	-1.75	0.0208
XF37_06680	hydrogenase	2	-2.02	0.000233	0.74	0.742	-0.1	0.932	0.9	0.379
XF37_06685	hydrogenase	3	-2.17	0.00591	1.41	0.538	-0.05	0.969	0.7	0.694
XF37_06690	hydrogenase 1 b-type cytochrome subunit	3	-1.82	5.44e-05	1.21	0.134	-0.72	0.261	0.79	0.478
XF37_06695	hydrogenase 1 maturation protease	3	-1.71	3.96e-05	1.54	0.0149	-0.44	0.615	0.71	0.67
XF37_06700	hydrogenase-1 operon protein HyaE	2	-1.49	0.00314	0.63	0.829	-0.57	0.492	0.47	0.956
XF37_06715	cytochrome d ubiquinol oxidase subunit 2	2	-1.31	0.0299	0.15	0.998	-0.43	0.655	0.72	0.707
XF37_06730	protein-tyrosine kinase	2	-1.78	0.000111	0.3	0.989	-0.49	0.552	0.09	1
XF37_06735	protein tyrosine phosphatase	2	-1.45	0.000332	-0.35	0.974	-1.26	0.115	0.84	0.636
XF37_06740	polysaccharide export protein Wza	2	-1.75	0.00115	0.13	0.998	-0.65	0.397	0.67	0.694
XF37_06745	membrane protein	2	-1.91	1.15e-05	-0.16	0.998	-0.97	0.141	0.61	0.738
XF37_06750	hypothetical protein	2	-2.64	7.7e-05	-0.02	0.998	1.5	0.101	-1.99	0.0585
XF37_06755	regulator	2	-2.45	6.9e-05	0.48	0.976	1.01	0.553	-1.08	0.797
XF37_06765	cold-shock protein	2	-1.3	0.000164	-0.23	0.989	2.17	0.00415	-0.07	1
XF37_06770	cold-shock protein	2	-0.2	0.653	0.36	0.969	1.75	0.0256	0.41	1
XF37_06800	trimethylamine N-oxide reductase cytochrome c-type subunit	1	-0.6	0.259	1.45	0.161	-0.69	0.448	2.03	0.01
XF37_06810	chaperone protein TorD	4	-1.38	0.0196	-0.94	0.606	1.01	0.437	-1.66	0.238
XF37_06815	chaperone-modulator protein CbpM	5	2.25	1.89e-05	0.5	0.823	-0.12	0.933	-0.12	1
XF37_06820	DNA-binding protein	5	1.47	2.55e-08	0.45	0.177	-0.7	0.3	-0.33	1
XF37_06830	glucose-1-phosphatase	5	1.24	7.48e-06	-0.07	0.998	-0.54	0.626	-0.39	1
XF37_06835	hypothetical protein	5	1.31	9.97e-05	0.77	0.186	-1.25	0.0838	0.25	1
XF37_06850	FMN reductase	6	5.14	2.4e-07	-0.42	0.981	7.05	3.09e-13	-0.16	1	Rut pathway (rut) operon
XF37_06855	malonic semialdehyde reductase	6	5.62	6.16e-10	-0.35	0.96	7.06	2.65e-11	0.02	1
XF37_06860	aminoacrylate hydrolase	6	6.37	1.83e-11	-0.56	0.627	7.52	3.24e-13	0.25	1
XF37_06865	aminoacrylate peracid reductase	6	6.5	3.94e-07	0.03	0.998	9.42	6.87e-16	0.52	0.875
XF37_06870	amidohydrolase	6	7.24	2.12e-10	0.06	0.998	9.18	1.4e-12	0.15	1
XF37_06875	pyrimidine monooxygenase	6	8.98	1.28e-11	-0.1	0.998	9.78	1.88e-14	0.34	1
XF37_06880	transcriptional regulator	5	1.14	0.0137	-0.29	0.995	-0.95	0.156	0.56	0.865
XF37_06885	transcriptional regulator	2	-2.74	4.87e-09	0.39	0.843	-1.64	0.0236	-0.31	1
XF37_06890	hypothetical protein	2	-3.08	0.000285	-0.54	0.989	-0.23	0.864	-0.18	1
XF37_06910	iron permease	2	-1.13	0.00867	0.01	0.998	-0.12	0.911	0.68	0.653
XF37_06915	ferrous iron transporter	2	-1.68	2.16e-05	-0.08	0.998	-0.07	0.951	0.37	1
XF37_06920	peroxidase	2	-1.47	0.000793	0.27	0.995	-0.8	0.378	0.73	0.806
XF37_06925	hypothetical protein	5	3.04	4.33e-08	-0.15	0.998	0	0.998	-0.45	0.902
XF37_06930	hypothetical protein	5	5.25	4.59e-17	0.03	0.998	-0.43	0.645	-0.13	1
XF37_06935	PGA biosynthesis protein	2	-1.74	0.00173	0.15	0.998	-0.49	0.793	-0.46	1
XF37_06940	N-glycosyltransferase	3	-3.02	1.1e-05	-0.29	0.998	-1.32	0.0605	0.42	0.982
XF37_06945	outer membrane N-deacetylase	3	-3.53	1.09e-08	0.96	0.428	-1.55	0.0241	0.27	1
XF37_06950	poly-beta-1,6-N-acetyl-D-glucosamine export protein	2	-3.73	3.29e-09	0.28	0.998	-0.16	0.898	0.16	1
XF37_06955	diguanylate cyclase	2	-1.96	2.42e-05	-0.01	0.998	-0.08	0.95	0.2	1
XF37_06965	FidL	3	-3.13	1.84e-07	0.41	0.976	-1.31	0.12	1.77	0.0963
XF37_06970	transcriptional regulator	2	-2.74	2.86e-06	0.76	0.693	-1.33	0.0256	0.64	0.705
XF37_06975	oxidoreductase	2	-1.01	0.0112	0.13	0.998	-0.14	0.917	0.41	1
XF37_06995	molecular chaperone	3	-3.29	0.000101	3.17	0.0176	-0.29	0.754	0.43	0.912
XF37_07015	hemolysin	2	-2.38	3.97e-06	1.07	0.25	0.57	0.661	-1.2	0.569
XF37_07035	acyl carrier protein	2	-2.37	0.0218	-1.77	0.616	0.26	0.858	-1.29	0.447
XF37_07040	aminomethyltransferase	2	-1.12	0.0165	0.53	0.878	0.67	0.492	0.56	0.92
XF37_07045	beta-ketoacyl-ACP synthase	2	-1.55	0.00414	-0.01	0.998	-0.43	0.653	0.93	0.434
XF37_07055	ATP-binding protein	3	-2.11	0.000886	1.83	0.12	-0.4	0.811	1.17	0.548
XF37_07060	ABC transporter	2	-2.38	0.000233	-0.12	0.998	0.06	0.969	-0.03	1
XF37_07065	hypothetical protein	3	-3.27	0.00142	1.48	0.631	-0.26	0.867	-0.08	1
XF37_07070	ABC transporter permease	2	-1.36	0.109	-0.15	0.998	1.48	0.0424	-0.27	1
XF37_07100	membrane protein	3	-2.79	1.34e-09	0.65	0.428	-2.09	0.000975	-0.76	0.646
XF37_07110	transposase	4	-1.54	0.0262	-1.81	0.22	1.68	0.075	-2.11	0.0531
XF37_07120	hypothetical protein	1	-1.59	0.0296	-2.64	0.0514	-0.16	0.932	0.86	0.836
XF37_07150	transposase	2	-1.58	0.0152	1.22	0.411	-0.57	0.673	-0.36	1
XF37_07180	nucleoside permease	2	-2.25	2.09e-08	-0.1	0.998	-0.5	0.554	-0.71	0.699
XF37_07185	manganese transport protein MntH	5	1.67	0.000124	0.24	0.989	-1.19	0.106	-0.01	1
XF37_07190	hypothetical protein	4	2.48	8.63e-06	0.42	0.915	1.26	0.0698	0.85	0.523
XF37_07195	hypothetical protein	5	1.41	2.12e-05	0.2	0.976	-0.15	0.914	0.97	0.526
XF37_07210	PTS fructose transporter subunit IIB	4	1.21	0.167	-2.38	0.244	3.68	1.35e-06	-4.92	1.97e-07
XF37_07215	PTS fructose transporter subunit IIC	4	1.11	0.262	-2.7	0.224	3.36	1.64e-05	-2.33	0.00542
XF37_07220	aminopeptidase	2	-0.42	0.567	-0.17	0.998	2.85	5.35e-05	-3.17	4.9e-05
XF37_07225	aminopeptidase	4	-0.67	0.508	-1.58	0.622	2.21	0.0233	-3.56	0.00137
XF37_07240	LytTR family transcriptional regulator	2	-1.59	1.18e-05	0.45	0.769	-0.85	0.262	-0.72	0.72
XF37_07245	membrane protein	2	-2.13	1.1e-05	-0.18	0.998	-0.58	0.388	-0.18	1
XF37_07250	glutamate-pyruvate aminotransferase	4	2.48	1.57e-09	0	0.999	3.22	0.000535	0.16	1
XF37_07260	hypothetical protein	5	2.15	3.09e-06	-0.29	0.974	-1.35	0.0386	0.17	1
XF37_07275	hypothetical protein	4	4.17	2.97e-06	-6.48	0.000152	0.31	0.771	-0.45	0.943
XF37_07280	formyl-coenzyme A transferase	4	3.63	3.23e-07	-3.81	0.00108	0.82	0.349	0.87	0.478
XF37_07285	oxalyl-CoA decarboxylase	4	2.94	1.85e-06	-3.65	0.00108	0.55	0.573	-0.77	0.608
XF37_07290	transporter YfdV	4	2.46	0.00136	-5.11	0.000152	-0.26	0.896	1.52	0.299
XF37_07305	histidine kinase	2	-2.71	7.11e-09	0.33	0.931	-1.31	0.0693	0.21	1
XF37_07310	transcriptional regulator	2	-1.59	1.8e-05	0.13	0.998	-0.92	0.196	0.28	1
XF37_07315	multidrug transporter	4	0.6	0.25	-2.42	0.0176	-0.2	0.901	0.51	0.988
XF37_07340	glycosyl hydrolase family 32	4	1.94	0.000186	-0.47	0.923	1.95	0.0037	-0.19	1
XF37_07345	aminoimidazole riboside kinase	4	1.81	0.00278	-0.15	0.998	0.2	0.911	-2.74	0.0212
XF37_07365	hypothetical protein	2	-1.6	0.00198	-0.68	0.829	0.77	0.324	-0.85	0.45
XF37_07370	hypothetical protein	3	-3.99	1.34e-09	0.98	0.383	-1.74	0.000791	-0.23	1
XF37_07380	hypothetical protein	2	-2.17	0.0274	1.72	0.45	1.06	0.16	-2.57	0.00667
XF37_07395	DNA transfer protein p33	1	-0.28	0.579	0.7	0.717	-1.87	0.00852	0.52	0.921
XF37_07400	integrase	2	-2.26	0.000142	0.51	0.957	0.88	0.164	-0.05	1
XF37_07440	hypothetical protein	5	2.87	4.14e-06	-0.84	0.586	0.5	0.711	-0.64	0.913
XF37_07445	antirepressor	5	1.41	0.000132	0.38	0.84	0.15	0.896	-0.01	1
XF37_07460	valyl-tRNA synthetase	5	1.26	1.46e-05	0.66	0.126	0.27	0.784	0.06	1
XF37_07470	sugar acetyltransferase inhibitor	5	1.21	0.000404	0.56	0.524	0.03	0.983	0.24	1
XF37_07475	hypothetical protein	5	1.08	0.00601	0.65	0.549	0.18	0.864	0.16	1
XF37_07485	hypothetical protein	5	1.1	0.0002	0.46	0.566	-0.11	0.945	0.22	1
XF37_07490	conjugal transfer protein TraR	5	1.22	0.0401	0.93	0.531	-0.67	0.589	0.71	0.884
XF37_07525	exonuclease	4	2.87	2.39e-06	-0.01	0.998	1.56	0.123	-0.77	0.824
XF37_07560	glutamate decarboxylase	5	1.6	1.47e-08	-0.16	0.928	0.58	0.33	-0.19	1
XF37_07565	hypothetical protein	4	1.55	0.172	-0.34	0.998	0.53	0.56	-2.07	0.0219
XF37_07570	zinc protease	2	-1.3	0.000325	-0.27	0.981	0.88	0.462	-0.11	1
XF37_07580	multidrug ABC transporter ATP-binding protein	3	-3.31	4.15e-05	1.69	0.247	-1.11	0.232	1.64	0.103
XF37_07595	transcriptional regulator YdeO	4	1.63	0.00529	-1.85	0.142	-0.29	0.785	-0.88	0.509
XF37_07605	oxidoreductase	4	0.4	0.248	-2.02	0.0108	-0.63	0.429	0.8	0.568
XF37_07610	fimbrial protein	3	-6.84	1.73e-09	1.32	0.622	-0.61	0.632	-0.73	0.919	Fimbrial (fim) operon
XF37_07615	fimbrial protein	3	-5.45	2.29e-08	0.52	0.986	-0.82	0.576	0.22	1
XF37_07625	fimbrial protein	3	-3.94	4.08e-08	-0.49	0.98	-0.94	0.154	0.37	1
XF37_07630	fimbrial chaperone protein FimC	3	-6.28	2.26e-09	2.06	0.236	-0.47	0.722	-2.22	0.0799
XF37_07635	fimbrial protein	3	-4.14	1.51e-07	0.27	0.998	-3.12	0.000134	-0.91	0.652
XF37_07660	autoinducer kinase	5	3.22	1.36e-11	-0.26	0.882	-0.37	0.711	-1.07	0.367	LuxS-mediated quorum sensing (lsr) operon
XF37_07665	transcriptional regulator LsrR	5	1.63	1.35e-07	-0.21	0.956	-1.14	0.0406	-0.61	0.694
XF37_07670	sugar ABC transporter	5	1.62	1.4e-07	-0.16	0.989	-1.4	0.0307	-0.52	0.917
XF37_07675	ABC transporter permease	5	1.59	0.00734	-0.15	0.998	-0.84	0.305	-0.46	0.997
XF37_07680	histidine kinase	5	2.46	7.06e-08	-0.52	0.646	-0.53	0.439	-1.12	0.16
XF37_07685	autoinducer 2-binding protein lsrB	5	1.87	5.4e-09	-0.2	0.948	-0.48	0.513	-0.76	0.509
XF37_07690	autoinducer 2 aldolase	5	1.78	3.73e-07	-0.35	0.789	-0.62	0.545	-0.54	0.978
XF37_07695	autoinducer-2 (AI-2) modifying protein LsrG	5	1.98	0.000228	-0.17	0.998	-0.28	0.773	-1.18	0.188
XF37_07705	hypothetical protein	2	-1.22	0.00614	0.07	0.998	0.95	0.151	0.64	0.707
XF37_07720	diguanylate cyclase	1	-1.39	5.79e-05	0.67	0.428	-0.99	0.0779	-0.03	1
XF37_07725	hypothetical protein	2	-3.12	0.000528	-0.36	0.998	0.36	0.785	0.1	1
XF37_07730	glutaminase	2	-1.12	0.0327	-0.25	0.998	1.31	0.0407	0.41	0.982
XF37_07745	hypothetical protein	3	-2.69	0.000336	2.21	0.107	0.09	0.963	-0.48	1
XF37_07765	transcriptional regulator	1	-0.58	0.193	0.72	0.663	-0.08	0.957	2.45	0.00803
XF37_07770	transcriptional regulator	3	-0.77	0.278	1.12	0.657	-1.92	0.012	3.68	0.0001
XF37_07775	hypothetical protein	1	-0.42	0.47	1.91	0.0528	0.34	0.731	2.25	0.00339
XF37_07780	acetylserine transporter	4	1.86	0.00012	-0.71	0.629	0.3	0.805	-0.05	1
XF37_07790	rhodanese	5	2.48	3.49e-06	0.09	0.998	0.69	0.394	0.14	1
XF37_07795	transcriptional regulator	5	1.44	3.16e-05	-0.18	0.998	0.49	0.593	0.13	1
XF37_07800	membrane protein	1	0.78	0.0408	0.46	0.838	-3.32	3.25e-05	-0.31	1
XF37_07805	diguanylate cyclase	2	-1.15	3.4e-05	0.31	0.8	-0.59	0.502	0.61	0.819
XF37_07810	hypothetical protein	1	2.35	1.01e-08	0.76	0.111	-0.79	0.352	0.85	0.572
XF37_07830	GntR family transcriptional regulator	2	-1.17	0.00476	0.01	0.998	0.41	0.557	-0.12	1
XF37_07835	selenoprotein YdfZ	1	-0.52	0.301	0.76	0.666	0.14	0.898	1.85	0.00803
XF37_07845	symporter	2	-1.14	0.00775	-0.4	0.947	0.5	0.652	-0.02	1
XF37_07850	damage-inducible protein DinI	4	0.31	0.627	-3.1	0.00153	3.14	4.32e-06	0.5	0.894
XF37_07855	tail assembly protein	2	-0.14	0.856	-0.3	0.998	1.35	0.0471	-0.53	0.855
XF37_07870	protein kil	5	1.75	1.57e-05	0.45	0.742	0.17	0.898	-0.02	1
XF37_07875	hypothetical protein	5	1.9	0.000294	0.23	0.998	-0.3	0.747	0.12	1
XF37_07880	Lambda prophage-derived protein ea10	5	2.24	1.7e-10	0.2	0.864	-0.34	0.727	0.03	1
XF37_07885	hypothetical protein	4	2.08	0.026	-1.4	0.58	-1.38	0.0935	-1.01	0.574
XF37_07890	antitermination protein N	5	1.8	7e-05	0.35	0.944	-0.88	0.242	-0.37	1
XF37_07920	hypothetical protein	5	1.22	0.0407	0.26	0.998	0.49	0.757	-1.09	0.617
XF37_07955	ornithine decarboxylase	2	-2.61	1.81e-07	0.06	0.998	0.19	0.861	-0.58	0.829
XF37_07965	murein transglycosylase	2	-1.65	6.72e-05	0.15	0.998	0.3	0.759	0.12	1
XF37_07970	oxidative damage protection protein	2	-1.57	0.000552	0.31	0.989	0.35	0.797	0.7	0.892
XF37_07975	adenine glycosylase	2	-1.02	0.00275	-0.17	0.998	0.32	0.671	0.17	1
XF37_08000	L-asparaginase II	2	-2.43	7e-07	0.17	0.998	-0.47	0.636	-0.29	1
XF37_08005	hypothetical protein	2	-1.12	0.00429	0	0.999	0.09	0.956	-0.37	1
XF37_08010	coproporphyrinogen III oxidase	2	-1.61	1.94e-06	0.01	0.998	0.38	0.633	-0.71	0.604
XF37_08015	nucleoside-triphosphate diphosphatase	2	-1.3	0.0249	-0.21	0.998	0.57	0.462	0.11	1
XF37_08020	hypothetical protein	2	-1.54	0.000224	0.45	0.877	-0.09	0.96	0.73	0.892
XF37_08025	hypothetical protein	2	-1.47	0.000295	0.05	0.998	0.19	0.851	0.32	1
XF37_08060	DNA-specific endonuclease I	2	-1.55	0.00833	0.33	0.998	-0.11	0.941	0.21	1
XF37_08065	hypothetical protein	2	-1.9	0.00345	1.38	0.343	0.56	0.651	-0.99	0.698
XF37_08070	D-galactose transporter GalP	4	1.67	0.000136	-0.85	0.428	2.03	0.0012	0.25	1
XF37_08075	S-adenosylmethionine synthetase	4	0.32	0.107	0.12	0.997	3.17	9.96e-07	0.18	1
XF37_08080	membrane protein	2	-2.36	0.000268	-0.23	0.998	0.07	0.957	-0.1	1
XF37_08085	hypothetical protein	4	1.73	0.0143	-1.07	0.497	1.8	0.0469	-0.5	1
XF37_08090	hypothetical protein	2	-2.59	2.84e-08	0.04	0.998	-0.2	0.857	0.13	1
XF37_08095	arginine decarboxylase	2	-1.88	2.16e-09	0.27	0.769	-0.51	0.647	0.36	1
XF37_08100	membrane protein	1	-1.78	0.00163	-1.04	0.526	-0.49	0.596	-0.59	0.79
XF37_08105	agmatinase	2	-2.12	2.41e-08	0.19	0.989	-1.15	0.0664	-0.26	1
XF37_08115	transketolase	2	-2.15	9.81e-10	-0.24	0.929	0.09	0.944	0.06	1
XF37_08120	PTS system mannitol-specific transporter subunit IIA	3	-1.86	0.0158	0.62	0.979	-2.01	0.059	1.03	0.709
XF37_08150	ABC transporter ATP-binding protein	2	-2.27	0.000217	-0.03	0.998	0.88	0.26	-0.42	0.968
XF37_08155	cobalt ABC transporter ATP-binding protein	3	-4.5	1.29e-05	-0.66	0.986	-0.34	0.71	0.81	0.408
XF37_08160	cobalt ABC transporter permease	3	-3.35	7.68e-06	-0.76	0.867	-0.56	0.678	-0.33	1
XF37_08165	membrane protein	2	-1.83	0.000959	-0.25	0.998	0.07	0.968	-0.35	1
XF37_08170	DNA-binding protein	2	-2.47	4.9e-05	-0.16	0.998	1.19	0.11	0.21	1
XF37_08185	fructose-bisphosphate aldolase	2	-1.55	2.74e-09	0.01	0.998	-0.62	0.173	0.13	1
XF37_08205	LysR family transcriptional regulator	1	-1.44	0.021	-1.42	0.343	0.62	0.55	1.21	0.302
XF37_08210	hypothetical protein	4	-0.45	0.363	-2.77	0.00131	1.15	0.139	-1.59	0.0961
XF37_08220	methylmalonyl-CoA decarboxylase	3	-3.01	0.000139	2.39	0.0876	-0.87	0.284	2.17	0.00667
XF37_08240	ribose 5-phosphate isomerase	2	-1.1	6.37e-05	-0.14	0.998	0.33	0.815	0.28	1
XF37_08260	Z-ring-associated protein	5	1.8	7.72e-08	-0.01	0.998	-0.47	0.702	0.17	1
XF37_08285	glycine cleavage system protein T	2	-2.88	9.92e-09	0.61	0.603	-1.36	0.0196	-0.04	1
XF37_08290	glycine cleavage system protein H	3	-2.17	6.36e-06	0.53	0.843	-1.7	0.0259	-0.6	0.912
XF37_08295	glycine dehydrogenase	2	-3	6.81e-10	0.4	0.843	-0.96	0.133	-0.34	1
XF37_08310	hemolysin	4	1.78	2.17e-09	0.3	0.596	1.4	0.0407	0.18	1
XF37_08345	ssDNA exonuclease RecJ	2	-1.16	0.00145	-0.22	0.998	0.51	0.552	-0.04	1
XF37_08350	peptide chain release factor 2	2	-2.19	2.16e-09	-0.02	0.998	0.29	0.807	0.06	1
XF37_08355	lysine--tRNA ligase	2	-2.22	3.7e-10	0.09	0.998	0.17	0.889	0.03	1
XF37_08395	guanine deaminase	2	-0.48	0.408	-0.28	0.998	1.22	0.0469	-1.31	0.0949
XF37_08425	molybdenum cofactor cytidylyltransferase	1	0.6	0.0829	-0.41	0.888	-1.38	0.0195	0.16	1
XF37_08445	phenylhydantoinase	2	-1.41	0.0355	0.01	0.999	-1	0.18	0.48	0.943
XF37_08450	peptidase	1	-1.64	0.00257	0.48	0.964	-2.05	0.0594	-0.6	1
XF37_08455	diaminopropionate ammonia-lyase	3	-2.28	2.73e-05	-0.26	0.998	-1.66	0.0256	-1.35	0.164
XF37_08460	ornithine carbamoyltransferase	3	-2.1	3.12e-05	0.05	0.998	-1.57	0.0645	-0.92	0.616
XF37_08475	xanthine dehydrogenase	3	-1.6	0.0235	0.25	0.998	0.03	0.987	-2.21	0.0515
XF37_08480	xanthine dehydrogenase	2	-1.2	0.0453	0.28	0.998	0.3	0.791	-0.35	1
XF37_08495	lipoprotein	2	-2.8	3.05e-06	0.38	0.981	1.07	0.156	0.11	1	Type three secretion system - 2 (TTSS-2) gene cluster
XF37_08500	hypothetical protein	2	-2.48	0.000107	0.87	0.729	-0.05	0.97	0.62	0.888
XF37_08505	membrane protein	3	-2.71	0.00429	-1.26	0.776	-1.27	0.227	0.64	0.984
XF37_08510	AraC family transcriptional regulator	4	-1.15	0.0788	-2.58	0.0314	0.23	0.876	-1.68	0.203
XF37_08515	type III secretion system outer membrane pore InvG	2	-1.98	0.00674	0.18	0.998	0.21	0.829	0.8	0.476
XF37_08520	type III secretion system protein	3	-3.69	8.36e-05	0.54	0.991	-1.21	0.23	1.25	0.337
XF37_08525	type III secretion system protein InvA	2	-2.62	1.59e-05	0.57	0.923	0.31	0.769	0.51	0.883
XF37_08530	ATP synthase	2	-2.71	0.000307	-1.74	0.286	-0.23	0.861	-1.16	0.268
XF37_08535	type III secretion protein	3	-6.72	2.16e-09	4.09	0.00188	-2.77	0.0108	1.88	0.189
XF37_08545	type III secretion protein	3	-3.61	6.62e-08	2.22	0.00824	-0.22	0.861	-1.92	0.0647
XF37_08550	type III secretion system protein	3	-2.93	9.59e-06	1.14	0.494	-1.08	0.253	1.3	0.246
XF37_08555	type III secretion system protein	3	-4.53	4.03e-06	0.71	0.96	-1.3	0.252	1.1	0.639
XF37_08560	type III secretion system protein SpaQ	2	-1.83	0.0396	0.72	0.944	-0.41	0.797	0.17	1
XF37_08575	type III secretion system protein SpaS	3	-2.36	0.0017	-1.48	0.44	-1.96	0.0562	-0.49	1
XF37_08580	invasion protein	4	0.54	0.37	-2.26	0.0176	-0.6	0.645	0.82	0.859
XF37_08595	type III secretion system needle complex protein PrgI	3	-4.68	1.12e-05	2.41	0.158	-1.91	0.0156	1.64	0.12
XF37_08605	type III secretion system lipoprotein PrgK	1	-1.85	0.000278	-1.06	0.328	-0.14	0.932	0.07	1
XF37_08630	lytic transglycosylase	3	-3.18	0.000233	0.94	0.826	-1.41	0.166	-0.84	0.884
XF37_08635	hypothetical protein	3	-2.11	0.0348	0.24	0.998	-1.99	0.0453	0.38	1
XF37_08640	transcriptional regulator	2	-2.99	1.27e-07	0.49	0.892	-0.39	0.71	0.68	0.697
XF37_08650	hypothetical protein	3	-3.47	0.000161	0.49	0.998	-2.97	0.00177	1.59	0.219
XF37_08655	hypothetical protein	3	-4.47	4.48e-05	0.3	0.998	-1.55	0.248	-0.79	0.968
XF37_08665	hypothetical protein	2	-1.78	0.0402	1.05	0.73	-0.5	0.677	1.62	0.115
XF37_08670	hypothetical protein	3	-2.33	0.0183	2.4	0.136	-1.24	0.333	0.91	0.882
XF37_08680	hypothetical protein	2	-3.4	2.95e-07	0.42	0.98	1.22	0.367	-1.59	0.314
XF37_08690	transporter	1	-1.34	0.00127	0.21	0.998	-0.89	0.304	0.15	1
XF37_08710	arabinose:proton symporter	4	0.96	0.0392	-1.41	0.222	1.46	0.0155	-1.23	0.126
XF37_08715	racemase	5	1.12	0.00101	-1	0.166	0.56	0.504	-0.37	1
XF37_08725	diaminopimelate decarboxylase	4	1.53	1.03e-05	0.14	0.998	0.78	0.464	0.84	0.746
XF37_08750	hypothetical protein	5	1.08	0.0159	-0.06	0.998	0.49	0.555	0.76	0.589
XF37_08770	hypothetical protein	1	2.18	0.00333	-2.2	0.0436	-2.4	0.0307	2.08	0.133
XF37_08785	diacylglyceryl transferase	2	-1.12	0.000121	-0.04	0.998	0	0.999	0.17	1
XF37_08790	thymidylate synthase	2	-1.86	8.51e-09	0.15	0.995	-1.08	0.0635	-0.01	1
XF37_08820	protease	2	-1.09	0.000104	-0.05	0.998	0.31	0.818	0.21	1
XF37_08835	N-acetylglutamate synthase	4	2.51	1.56e-11	-1.38	0.000688	4.3	5.5e-06	-0.94	0.689
XF37_08840	N-acetylmuramoyl-L-alanine amidase	2	0.56	0.07	-0.58	0.606	1.52	0.0368	0.24	1
XF37_08855	NA	4	1.41	0.000982	-0.35	0.957	1.94	0.0185	-0.72	0.736
XF37_08860	murein transglycosylase	2	-1.41	3.5e-06	-0.21	0.981	0.24	0.864	-0.04	1
XF37_08870	CsdA-binding activator	2	-1.65	0.00084	0.21	0.998	-0.14	0.926	0.17	1
XF37_08875	cysteine sulfinate desulfinase	2	-1.29	0.000715	0	0.998	0.17	0.877	0.44	0.968
XF37_08880	hypothetical protein	5	6.03	5.06e-15	-0.06	0.998	-0.28	0.817	1.01	0.47
XF37_08885	transcriptional regulator	5	1.01	0.00526	-0.34	0.944	0.56	0.496	0.4	0.997
XF37_08915	sugar isomerase	4	0.88	0.022	-1.03	0.296	2.48	0.000435	-1.4	0.14
XF37_08920	L-fucose transporter	4	1.2	0.00069	-0.73	0.428	1.65	0.0209	-1.52	0.11
XF37_08925	fuculose phosphate aldolase	5	1.17	0.00302	-0.46	0.862	0.32	0.749	-0.84	0.576
XF37_08930	1,2-propanediol oxidoreductase	5	1.13	0.000419	-0.54	0.596	0.29	0.811	-0.36	1
XF37_08940	serine dehydratase	1	-2.44	5.78e-06	-0.44	0.974	-0.15	0.913	0.4	1
XF37_08945	serine/threonine protein kinase	2	-2.88	3.99e-11	0.17	0.997	-1.39	0.0282	0.17	1
XF37_08955	7-cyano-7-deazaguanine reductase	2	-1.42	2.6e-07	-0.06	0.998	-0.09	0.939	0.3	1
XF37_08965	hypothetical protein	1	-1.39	1.54e-05	-0.33	0.722	-2.83	7.43e-05	-0.56	0.875
XF37_08975	tRNA pseudouridine synthase C	2	-1.55	0.00557	-0.5	0.979	-0.21	0.829	-0.39	0.991
XF37_08985	glucarate transporter	2	-0.21	0.738	0.13	0.998	1.95	0.0211	-1.28	0.338
XF37_09000	histidine kinase	2	-1.15	0.0222	-0.08	0.998	-0.05	0.971	0.19	1
XF37_09005	23S rRNA methyltransferase	2	0.39	0.0723	-0.31	0.787	1.97	0.00588	-0.74	0.732
XF37_09010	(p)ppGpp synthetase	2	0.37	0.136	-0.4	0.694	1.59	0.0178	-0.8	0.604
XF37_09030	CTP synthetase	2	-1.11	1.28e-06	0.1	0.998	0.02	0.99	0.04	1
XF37_09075	membrane protein	2	-1.91	0.00215	0.71	0.852	-0.93	0.517	1.61	0.278
XF37_09080	oxidoreductase	2	-2.46	0.00531	-0.65	0.981	1.53	0.0708	0.26	1
XF37_09085	FAD-linked oxidoreductase	2	-0.36	0.478	0.5	0.927	1.66	0.0157	-1.12	0.236
XF37_09100	electron transfer flavoprotein	2	-0.68	0.34	-0.37	0.998	-0.59	0.442	1.64	0.0167
XF37_09125	6-carboxy-5,6,7,8-tetrahydropterin synthase	2	-1.46	0.00406	-0.51	0.954	2.02	0.00375	0.08	1
XF37_09130	sulfite reductase subunit alpha	5	3.44	9.11e-14	-0.51	0.221	1.21	0.0469	0.3	1
XF37_09135	sulfite reductase subunit beta	5	2.96	2.77e-10	-0.46	0.602	1.27	0.0219	0.29	1
XF37_09140	phosphoadenosine phosphosulfate reductase	5	2.83	2.55e-11	-0.52	0.342	0.77	0.441	0.03	1
XF37_09145	membrane protein	5	1.47	0.0323	0.38	0.989	0.79	0.512	-0.76	0.851
XF37_09190	alkaline phosphatase	2	-2.07	2.79e-06	-0.11	0.998	-0.12	0.929	0.45	1
XF37_09195	sulfate adenylyltransferase subunit 2	5	4.36	4.61e-11	-0.54	0.58	0.29	0.785	0.28	1
XF37_09200	sulfate adenylyltransferase subunit 1	5	3.97	2.71e-14	-0.55	0.185	0.84	0.497	0.15	1
XF37_09205	adenylylsulfate kinase	5	3.59	5.22e-06	-1.02	0.59	1.3	0.0261	0.04	1
XF37_09210	hypothetical protein	4	1.28	0.000317	-0.15	0.998	1.47	0.00627	0.61	0.649
XF37_09220	2-C-methyl-D-erythritol 4-phosphate cytidylyltransferase	2	-1.57	6.11e-06	0.24	0.981	0.53	0.555	0.06	1
XF37_09225	2-C-methyl-D-erythritol 2,4-cyclodiphosphate synthase	2	-1.47	5.9e-05	0.08	0.998	0.28	0.825	-0.09	1
XF37_09265	phenolic acid decarboxylase	2	0.41	0.6	0.86	0.838	1.56	0.0469	0.33	1
XF37_09275	serine/threonine protein phosphatase	3	-2.4	6.42e-05	1.02	0.529	-0.79	0.277	-2	0.0235
XF37_09280	DNA mismatch repair protein MutS	2	-1.62	2.72e-05	-0.22	0.998	0.14	0.92	0.31	1
XF37_09285	hypothetical protein	1	1.68	0.0386	1.61	0.297	0.22	0.848	1.36	0.134
XF37_09295	carbamoyl dehydratase HypE	2	-1.53	0.000209	0.24	0.998	-0.24	0.805	-0.2	1
XF37_09300	hydrogenase isoenzymes formation protein HypD	2	-2.29	7.6e-05	-0.1	0.998	0.51	0.498	-0.5	0.875
XF37_09305	hydrogenase assembly chaperone	4	-1.91	0.00434	-1.67	0.244	1.43	0.0897	-1.93	0.052
XF37_09310	hydrogenase nickel incorporation protein HypB	4	-2.16	0.00704	-1.75	0.48	1.06	0.167	-0.39	1
XF37_09315	hydrogenase nickel incorporation protein	2	-1.58	0.00151	0.14	0.998	-0.35	0.769	0.59	0.878
XF37_09335	formate hydrogenlyase subunit 3	2	-2.21	0.014	0.15	0.998	0.68	0.47	0.4	1
XF37_09350	formate hydrogenlyase complex iron-sulfur subunit	3	-3.96	0.00148	2.17	0.44	-1.02	0.495	2.12	0.167
XF37_09360	formate hydrogenlyase maturation protein HycH	2	-1.77	0.0213	1.48	0.46	0.28	0.777	-0.71	0.537
XF37_09370	6-phospho-beta-glucosidase	5	1.5	0.000114	-0.03	0.998	0.07	0.956	-0.05	1
XF37_09375	PTS system cellobiose/arbutin/salicin-specific transporter subunits IIBC	5	2.64	1.57e-05	-0.11	0.998	-0.05	0.966	-0.51	0.869
XF37_09405	transcriptional regulator	4	2.1	0.000391	-0.78	0.722	1.62	0.00523	-0.14	1
XF37_09415	transcriptional regulator	2	-1.14	0.00425	-0.18	0.998	-0.53	0.587	-0.31	1
XF37_09420	transcriptional regulator	2	-1.24	0.00561	0.27	0.998	-0.66	0.394	-0.78	0.545
XF37_09430	PTS system glucitol/sorbitol-specific transporter subunit IIA	2	-1.97	0.032	0.83	0.931	-0.36	0.797	-0.21	1
XF37_09445	murein hydrolase effector LrgB	2	-1.63	0.000224	0.1	0.998	1.05	0.147	-0.34	1
XF37_09450	hypothetical protein	2	-1.14	0.0112	-0.37	0.983	0.24	0.805	0.1	1
XF37_09470	alanyl-tRNA synthetase	2	-1.45	5.26e-07	-0.15	0.986	-0.5	0.571	-0.13	1
XF37_09475	carbon storage regulator	5	1.3	0.00366	0.48	0.844	-0.26	0.781	0.63	0.696
XF37_09480	NA	4	2.42	8.93e-09	-0.46	0.623	2.64	5.91e-05	0.09	1
XF37_09485	NA	2	0.15	0.772	0.13	0.998	1.69	0.0294	-0.69	0.805
XF37_09495	NA	5	1.11	0.0175	0.47	0.888	1	0.29	-0.5	1
XF37_09500	NA	2	-0.15	0.785	1.16	0.265	2.54	0.00224	-0.38	1
XF37_09530	multidrug resistance protein B	2	-1.29	0.017	0.74	0.769	0.26	0.805	0.13	1
XF37_09535	multidrug transporter	2	-1.94	0.000977	0.4	0.989	1.08	0.167	0.67	0.806
XF37_09540	transcriptional repressor MprA	2	-2.15	0.000787	0.93	0.717	0.87	0.381	1.32	0.293
XF37_09545	L-valine exporter	2	-1.93	0.000558	0.15	0.998	0.36	0.673	-0.52	0.773
XF37_09555	transporter	2	0.37	0.631	-0.35	0.998	1.68	0.0181	0.78	0.646
XF37_09560	glycine/betaine ABC transporter substrate-binding protein	4	1.82	0.000155	-1.6	0.125	-0.49	0.653	-0.14	1
XF37_09565	glycine/betaine ABC transporter permease	5	3.93	2.02e-07	-1.57	0.172	0.42	0.784	-0.27	1
XF37_09570	glycine/betaine ABC transporter ATP-binding protein	5	5.79	1.94e-08	-1.07	0.44	2.22	0.0221	-0.19	1
XF37_09590	glutaredoxin	2	1.57	0.00301	0.76	0.614	1.1	0.0979	0.49	0.912
XF37_09595	alkylhydroperoxidase	3	-2.1	0.000529	-0.68	0.923	-1.86	0.0236	1.29	0.321
XF37_09605	hypothetical protein	5	2.96	2.2e-12	0	0.998	-0.3	0.78	0.55	0.884
XF37_09610	hypothetical protein	4	1.98	4.34e-06	-0.57	0.646	1.13	0.04	0.66	0.583
XF37_09615	membrane protein	1	-1.51	0.00234	0.25	0.998	-2.44	0.000346	-0.55	0.919
XF37_09635	membrane protein	5	1.1	0.00564	-0.38	0.942	-0.85	0.367	0.14	1
XF37_09640	peptidoglycan-binding protein	5	1.51	0.000215	0.22	0.993	-0.41	0.614	0.01	1
XF37_09645	transcriptional regulator	5	1.67	0.000891	-0.18	0.998	0.35	0.73	-0.54	0.917
XF37_09650	gamma-aminobutyrate transporter	5	1.54	0.00758	0.04	0.998	0.24	0.797	-0.66	0.686
XF37_09665	hydroxyglutarate oxidase	5	1.17	4.67e-05	0.15	0.997	-0.72	0.403	-0.26	1
XF37_09670	carbon starvation induced protein	5	3.27	3.9e-10	0.06	0.998	-0.87	0.29	-0.64	0.853
XF37_09680	alpha-amylase	3	-4.77	1.71e-06	1.92	0.256	0.06	0.969	-1.15	0.506
XF37_09695	hypothetical protein	3	-2.79	0.000153	-2.18	0.114	-1.98	0.0352	1.66	0.205
XF37_09710	NA	5	4.25	5.35e-06	-0.81	0.838	1.96	0.00127	0.12	1
XF37_09715	NA	5	2.9	0.000329	0.98	0.623	1.25	0.0635	0.34	1
XF37_09730	alpha-ketoglutarate transporter	5	2.01	1.12e-07	-0.43	0.691	-0.11	0.937	0.17	1
XF37_09750	DTW domain-containing protein YfiP	2	-1.49	0.00174	0.27	0.998	1.42	0.0581	1.17	0.28
XF37_09755	thioredoxin 2	2	0.46	0.0774	0.96	0.0362	0.71	0.381	2.35	0.00276
XF37_09765	methyltransferase	2	-1.46	0.00148	-0.06	0.998	0.38	0.651	0.12	1
XF37_09775	autonomous glycyl radical cofactor GrcA	3	-4.16	9.21e-10	0.19	0.998	-3.58	1.86e-06	0.88	0.576
XF37_09780	amino acid transporter	5	1.36	0.00594	-0.53	0.882	-0.24	0.815	1.11	0.21
XF37_09790	ATP-dependent RNA helicase SrmB	2	-1.48	1.54e-05	-0.08	0.998	0.61	0.42	0.49	0.909
XF37_09795	tRNA (adenine-N6)-methyltransferase	2	-0.82	0.0363	0.1	0.998	1.92	0.0219	0.07	1
XF37_09800	L-aspartate oxidase	4	1	0.0405	0.4	0.969	2.11	0.0018	-0.31	1
XF37_09805	hypothetical protein	5	2.91	1.36e-11	0	1	0.22	0.858	0.25	1
XF37_09810	RNA polymerase sigma factor RpoE	4	2.05	1.01e-11	-0.01	0.998	0.46	0.758	0.02	1
XF37_09815	anti-RNA polymerase sigma factor SigE	4	1.79	5.43e-10	-0.1	0.989	0.51	0.502	0.14	1
XF37_09830	elongation factor 4	2	-1.42	1.17e-05	0.17	0.989	0.12	0.915	0.17	1
XF37_09835	signal peptidase I	2	-1.19	2.5e-06	0.04	0.998	-0.29	0.807	-0.2	1
XF37_09845	GTP-binding protein Era	2	-1.41	3.17e-05	0.61	0.46	0	0.998	0.22	1
XF37_09850	DNA repair protein RecO	2	-1	0.000504	-0.07	0.998	-0.12	0.911	-0.02	1
XF37_09865	hypothetical protein	5	1.41	0.00443	0.25	0.998	0.04	0.973	0.83	0.544
XF37_09875	ferredoxin	2	-0.3	0.627	-0.03	0.998	1.59	0.0145	0.66	0.707
XF37_09880	transcriptional regulator	2	0.9	0.0574	-0.35	0.983	1.78	0.0128	0.3	1
XF37_09890	tRNA adenosine deaminase	2	-1.05	0.0116	0.06	0.998	0.63	0.53	0.33	1
XF37_09900	phosphoribosylformylglycinamidine synthase	2	-0.07	0.878	0.05	0.998	1.77	0.00497	-1.14	0.234
XF37_09925	dihydropteridine reductase	1	-0.88	0.0823	2.05	0.0142	-0.92	0.197	2.23	0.00512
XF37_09930	serine hydroxymethyltransferase	2	-1.33	1.77e-08	0.06	0.998	0.74	0.451	-0.37	1
XF37_09940	hypothetical protein	4	1.68	0.00441	-0.07	0.998	1.16	0.101	-0.76	0.653
XF37_09945	sugar ABC transporter substrate-binding protein	5	1.2	0.00207	-1.17	0.155	-0.28	0.782	-0.19	1
XF37_09970	membrane protein	5	2.03	7.47e-05	-0.31	0.988	0	0.998	0.16	1
XF37_09995	3-phenylpropionate dioxygenase	5	1.43	0.0273	-0.3	0.998	0.17	0.881	-0.42	0.956
XF37_10000	transcriptional regulator	5	4.04	9.69e-09	-0.98	0.326	0.17	0.889	-0.38	1
XF37_10010	stationary phase inducible protein CsiE	5	2.25	3.62e-11	-0.06	0.998	-0.72	0.393	-0.13	1
XF37_10015	hypothetical protein	2	-1.6	0.0183	0.56	0.975	0.82	0.446	0.42	1
XF37_10020	inositol monophosphatase	2	-1.79	1.1e-05	0.19	0.998	2.55	0.00243	0.29	1
XF37_10030	transcriptional regulator	5	1.09	8.6e-07	-0.05	0.998	0.72	0.444	0.38	1
XF37_10080	3-mercaptopyruvate sulfurtransferase	1	1.06	1.56e-05	-0.16	0.98	-1.57	0.00338	-0.13	1
XF37_10115	nucleoside diphosphate kinase	1	-2.62	2.03e-08	-0.2	0.998	-0.78	0.219	0.11	1
XF37_10120	ribosomal RNA large subunit methyltransferase N	2	-1.97	3.58e-06	0.24	0.993	0.3	0.823	0.21	1
XF37_10145	membrane biogenesis protein	2	-1.19	2.11e-06	-0.02	0.998	0.03	0.987	0.43	1
XF37_10150	GTP-binding protein Der	2	-1.06	9.96e-05	0.06	0.998	-0.21	0.861	-0.05	1
XF37_10165	inosine-5-monophosphate dehydrogenase	2	-1.95	2.91e-07	-0.2	0.995	0.93	0.254	-0.26	1
XF37_10170	GMP synthase	2	-1.74	5.47e-08	0.03	0.998	0.06	0.967	-0.38	1
XF37_10180	membrane protein	2	-2.2	1.15e-06	0.27	0.989	-0.71	0.341	0.05	1
XF37_10215	phosphoribosylaminoimidazole synthetase	4	0.34	0.439	0.33	0.981	3.06	0.000475	-1.4	0.297
XF37_10220	uracil phosphoribosyltransferase	2	-2.67	2.4e-08	0.11	0.998	0.08	0.943	-0.6	0.709
XF37_10225	uracil transporter	2	-2.43	1.32e-06	0.65	0.694	0.62	0.627	-0.15	1
XF37_10230	DNA replication initiation factor	2	-1.04	0.0198	0.23	0.998	0.77	0.384	0.42	1
XF37_10250	formate transporter	5	1.39	0.00696	-0.54	0.899	0.21	0.876	-0.3	1
XF37_10260	formate hydrogenlyase	4	0.51	0.474	-2.29	0.0676	0.71	0.431	-3	0.00163
XF37_10265	formate hydrogenlyase	1	-1.21	0.143	0.32	0.998	-1.6	0.0916	2.11	0.0404
XF37_10305	hydrogenase-4 F-S subunit	2	-2.66	0.00383	0.58	0.986	0.32	0.864	0.4	1
XF37_10325	lipoprotein	2	-1.14	2.19e-06	-0.11	0.998	0.1	0.942	-0.04	1
XF37_10335	phosphoribosylaminoimidazole-succinocarboxamide synthase	4	0.51	0.274	0.46	0.931	2.15	0.00167	-0.76	0.645
XF37_10350	hydrolase	5	1.55	9.36e-05	0.72	0.351	-0.43	0.572	1.07	0.198
XF37_10355	hypothetical protein	5	1.68	0.00766	0.75	0.761	-0.15	0.874	-0.14	1
XF37_10360	succinyl-diaminopimelate desuccinylase	1	0.27	0.251	0.58	0.232	-1.25	0.0375	0.1	1
XF37_10390	GDP-mannose pyrophosphatase	2	-1.38	1.05e-05	-0.27	0.962	0.48	0.695	-0.05	1
XF37_10400	transketolase	5	1.41	1.34e-08	0.32	0.379	-0.2	0.866	0.02	1
XF37_10405	transaldolase	5	1.53	9.87e-09	0.61	0.0436	-0.41	0.669	0.17	1
XF37_10420	ethanolamine utilization protein EutP	1	-0.9	0.29	-0.89	0.908	-2.22	0.00197	0.02	1	Ethanolamine utilization (eut) operon
XF37_10440	carboxysome structural protein EutM	1	0.64	0.478	-2.26	0.232	-2.19	0.00982	2.16	0.0242
XF37_10465	ethanolamine utilization protein EutH	5	0.67	0.153	0.45	0.923	-1.34	0.0411	0.69	0.697
XF37_10490	carboxysome structural protein EutK	5	1.3	0.00729	0.12	0.998	-0.04	0.975	-0.12	1
XF37_10495	transcriptional regulator EutR	5	1.57	0.00622	-0.81	0.743	0.14	0.934	-0.41	1
XF37_10500	coproporphyrinogen III oxidase	2	-1.65	0.000132	0.75	0.528	0.13	0.929	0.99	0.537
XF37_10530	esterase	5	1.09	0.0202	0.07	0.998	0.24	0.848	-0.4	1
XF37_10555	thiosulfate transporter subunit	5	3.93	1.09e-13	-0.77	0.0607	0.19	0.853	0.22	1
XF37_10560	sulfate/thiosulfate transporter subunit	5	4.94	6.78e-11	-1.26	0.0718	0.67	0.391	-0.04	1
XF37_10565	sulfate/thiosulfate transporter permease subunit	5	3.77	2.82e-12	-0.86	0.0761	0.88	0.178	-0.06	1
XF37_10570	sulfate/thiosulfate transporter subunit	5	3.23	1.23e-13	-0.91	0.00984	1.04	0.0738	-0.15	1
XF37_10605	cysteine synthase	4	1.91	2.06e-11	-0.44	0.0944	0.62	0.304	-0.13	1
XF37_10630	hypothetical protein	2	-1.07	0.00855	-0.34	0.981	-0.07	0.954	-0.04	1
XF37_10640	flxA-like family protein	2	-1.42	8.68e-05	0.65	0.494	-0.46	0.7	-0.04	1
XF37_10665	glutamyl-tRNA ligase	2	-1.95	3.83e-10	-0.03	0.998	0.03	0.982	-0.19	1
XF37_10670	transposase	5	2.16	1.38e-06	-0.08	0.998	-0.6	0.387	0	1
XF37_10690	amino acid permease	5	1.4	4.99e-07	-0.27	0.823	-0.23	0.783	0	1
XF37_10695	iron-sulfur cluster repair di-iron protein	1	-0.13	0.813	2.94	0.000126	-0.54	0.572	2.44	0.00522
XF37_10705	quinone oxidoreductase	5	5.23	4.49e-12	-1.2	0.0375	0.6	0.546	4.84	4.68e-07
XF37_10710	HxlR family transcriptional regulator	5	2.3	9.35e-06	-0.46	0.883	-0.48	0.529	0.36	0.997
XF37_10720	adenosine-3'(2'),5'-bisphosphate nucleotidase	5	1.14	6.16e-05	-0.05	0.998	-0.85	0.209	-0.06	1
XF37_10730	hypothetical protein	1	0.74	0.00219	-0.16	0.985	-1.32	0.0165	-0.11	1
XF37_10735	hypothetical protein	5	2.14	9.75e-08	0.07	0.998	-0.66	0.304	0.5	0.847
XF37_10745	methionine sulfoxide reductase A	5	1.11	0.000224	0.2	0.981	-0.14	0.903	0.04	1
XF37_10750	hypothetical protein	5	1.6	0.0102	0.19	0.998	-0.25	0.834	0.43	1
XF37_10760	translocation and assembly module TamB	5	1.08	1.9e-05	-0.5	0.365	0	1	-0.17	1
XF37_10765	gamma-glutamylcyclotransferase	5	1.55	2.16e-05	0.21	0.989	-0.02	0.987	-0.31	1
XF37_10770	antitoxin ChpS	4	2.2	0.000173	-1.61	0.0876	0.05	0.971	1.86	0.0277
XF37_10780	inorganic pyrophosphatase	2	-1.33	2.77e-05	0.15	0.998	-0.48	0.599	0.43	0.996
XF37_10785	sugar ABC transporter substrate-binding protein	4	3.11	2.43e-14	-0.72	0.0125	2.25	6.14e-05	-1.39	0.0478
XF37_10795	sugar ABC transporter permease	4	2.96	1.35e-07	-0.47	0.84	2.27	0.000203	-1.1	0.211
XF37_10800	ABC transporter permease	4	2.73	4.38e-05	-0.55	0.923	2.24	0.000813	-0.64	0.789
XF37_10830	ribonucleoside-triphosphate reductase	2	-1.59	0.00638	-1.16	0.545	1.67	0.00812	0.14	1
XF37_10835	ribonucleoside-triphosphate reductase	2	-0.79	0.00145	-0.46	0.588	1.82	0.0352	0.06	1
XF37_10840	trehalose-6-phosphate hydrolase	3	-3.86	7.3e-09	0.28	0.998	-1.75	0.00747	-0.6	0.848
XF37_10845	PTS system trehalose(maltose)-specific transporter subunits IIBC	2	-2.53	3.83e-07	-0.09	0.998	-1.17	0.0436	-0.57	0.797
XF37_10855	magnesium ABC transporter ATPase	2	-1.38	0.000383	-0.05	0.998	-0.87	0.287	-0.23	1
XF37_10860	endoribonuclease L-PSP	1	-1.8	3.99e-08	0.05	0.998	-1.75	0.0105	0.06	1
XF37_10870	aspartate carbamoyltransferase catalytic subunit	2	-1.52	3.36e-05	0.49	0.717	1.04	0.111	-0.51	0.892
XF37_10880	hypothetical protein	2	-1.68	0.00398	1.92	0.0528	1.15	0.124	-1.37	0.147
XF37_10890	oxidoreductase	1	0.84	0.0653	0.89	0.414	0.61	0.602	2.98	0.00339
XF37_10905	hypothetical protein	3	-2.18	1.98e-05	0.55	0.858	-1.59	0.0594	-0.53	0.968
XF37_10910	ornithine carbamoyltransferase	4	2.97	7.41e-11	-2.02	0.00023	4.07	4.93e-06	-0.14	1
XF37_10915	RNase E inhibitor protein	1	-0.71	0.00603	-0.07	0.998	-1.48	0.0113	0.02	1
XF37_10955	hypothetical protein	1	0.38	0.25	-0.19	0.998	-1.36	0.00575	-0.27	1
XF37_11000	hypothetical protein	1	-1.08	0.0218	-2.91	0.00055	-0.02	0.99	1.35	0.0959
XF37_11010	phage protein	5	1.21	0.0176	-0.38	0.981	0.28	0.805	0.11	1
XF37_11015	toxin	2	-1.74	0.000142	0.51	0.858	0.11	0.92	0.34	1
XF37_11020	structural protein	2	-2.78	0.00351	1.06	0.838	1.33	0.0533	-1.7	0.0816
XF37_11055	ABC transporter ATP-binding protein	4	1.86	4.2e-05	-1.01	0.288	3.38	1.94e-08	-2.83	4.07e-05
XF37_11060	amino acid ABC transporter permease	4	1.7	0.00196	-1.15	0.418	3.41	6.13e-07	-2.61	0.001
XF37_11065	amino acid ABC transporter permease	4	1.04	0.046	-1.07	0.526	3.4	1.01e-07	-2.31	0.0012
XF37_11070	amino acid ABC transporter substrate-binding protein	4	2.07	9.13e-06	-0.6	0.671	3.53	1.78e-08	-2	0.00339
XF37_11075	membrane protein	4	3.14	4.32e-08	-1.03	0.221	4.31	7.11e-09	-2.15	0.00512
XF37_11080	membrane protein	2	0.28	0.456	0.16	0.998	1.92	0.0344	2.09	0.0547
XF37_11090	multidrug transporter	2	-2.82	0.00214	0.75	0.945	-0.35	0.845	0.38	1
XF37_11100	hypothetical protein	2	-1.09	0.0476	0.87	0.663	0.63	0.628	-0.83	0.806
XF37_11105	methyltransferase	3	-4.35	7.17e-10	1.41	0.157	0.24	0.905	0.65	0.991
XF37_11110	Fis family transcriptional regulator	1	-1.27	0.0141	-0.75	0.72	0.11	0.945	-0.22	1
XF37_11115	tRNA-dihydrouridine synthase B	2	-1.85	3.27e-08	0.02	0.998	0.86	0.288	0.27	1
XF37_11120	ribosomal protein L11 methyltransferase	2	-1.03	0.00564	0.18	0.998	-0.29	0.784	-0.02	1
XF37_11130	hypothetical protein	2	-1.23	0.0219	0.1	0.998	1.18	0.156	-0.16	1
XF37_11135	acetyl-CoA carboxylase	2	-1.22	9.25e-06	0.05	0.998	-0.28	0.779	-0.07	1
XF37_11140	acetyl-CoA carboxylase	2	-1.33	0.000674	0.1	0.998	-0.03	0.977	-0.17	1
XF37_11175	rod shape-determining protein MreB	2	-1.22	6.5e-06	-0.01	0.998	0.97	0.128	-0.01	1
XF37_11180	rod shape-determining protein MreC	2	-1.48	0.000785	-0.08	0.998	0.71	0.385	0.13	1
XF37_11230	hypothetical protein	5	1.31	0.0255	-0.02	0.998	-0.7	0.352	-0.26	1
XF37_11235	membrane protein	1	0.92	0.244	2.55	0.0335	-1.73	0.00549	4.08	7.88e-07
XF37_11270	50S ribosomal protein L13	2	-1.85	2.66e-07	-0.01	0.998	0.61	0.494	0.19	1
XF37_11275	30S ribosomal protein S9	2	-1.85	1.33e-06	0.51	0.687	0.04	0.975	0.07	1
XF37_11300	N-acetylneuraminate lyase	2	-1.27	0.00307	0.19	0.998	0.4	0.647	-0.57	0.845
XF37_11325	hypothetical protein	2	0.45	0.425	0.08	0.998	1.56	0.0352	-0.46	0.991
XF37_11330	glutamate synthase	4	1.88	7.33e-08	-0.67	0.244	4.53	6.45e-09	-0.89	0.447
XF37_11335	glutamate synthase	4	1.1	3.08e-05	-0.74	0.0961	4.97	7.92e-12	-0.84	0.268
XF37_11360	hypothetical protein	1	0.53	0.277	0.38	0.976	-2.79	0.000137	-0.55	0.953
XF37_11385	RNA polymerase factor sigma-54	1	0.82	3.31e-05	-0.41	0.161	-1.45	0.0227	-0.65	0.696
XF37_11390	sugar ABC transporter ATP-binding protein	2	-1.06	0.000425	-0.12	0.998	-0.4	0.62	-0.02	1
XF37_11395	lipopolysaccharide transporter	2	-1.16	0.00255	0	0.998	-0.47	0.554	-0.12	1
XF37_11400	lipopolysaccharide transporter	2	-1.38	9.83e-05	0.05	0.998	-0.61	0.495	-0.08	1
XF37_11415	calcium/sodium:proton antiporter	4	1.79	0.000265	-0.58	0.808	0.41	0.57	0.05	1
XF37_11445	hypothetical protein	2	-1.85	7.96e-05	0.14	0.998	0.5	0.546	0.18	1
XF37_11450	UDP-N-acetylglucosamine 1-carboxyvinyltransferase	2	-1.72	2.94e-08	-0.01	0.998	0.24	0.786	0.04	1
XF37_11465	50S ribosomal protein L21	2	-1.75	3.94e-08	-0.05	0.998	0.76	0.167	0.03	1
XF37_11470	50S ribosomal protein L27	2	-1.45	0.00896	0.57	0.929	0.77	0.367	0.36	1
XF37_11475	membrane protein	2	-1.28	0.00121	0.36	0.954	-0.12	0.918	0.11	1
XF37_11480	GTPase CgtA	2	-1.72	1.61e-06	0.49	0.642	0.02	0.983	0.61	0.701
XF37_11485	D-alanyl-D-alanine carboxypeptidase	2	-1.87	5.63e-05	0.11	0.998	0.68	0.324	0.06	1
XF37_11530	phosphate starvation-inducible protein PsiE	2	-1.17	0.00845	0.28	0.998	-0.86	0.205	0.43	0.956
XF37_11535	argininosuccinate synthase	2	-0.2	0.299	-0.95	0.00633	2.44	0.000397	-0.43	0.996
XF37_11545	ribosome maturation protein RimP	2	-2.31	3.62e-11	0.01	0.998	0.54	0.645	0.13	1
XF37_11550	transcription elongation factor NusA	2	-2.16	1.2e-09	0.1	0.998	0.24	0.823	0.22	1
XF37_11555	translation initiation factor IF-2	2	-1.97	4.89e-08	0.03	0.998	-0.34	0.74	0.33	1
XF37_11560	ribosome-binding factor A	2	-1.04	0.0369	-0.04	0.998	-0.43	0.661	0.51	0.956
XF37_11585	DEAD/DEAH box helicase	2	-1.8	5.78e-08	0.18	0.979	0.37	0.783	0.21	1
XF37_11605	protease	3	-2.17	0.000344	1.52	0.215	0.94	0.26	0.05	1
XF37_11610	protease	1	-2.49	8.7e-05	-1.77	0.124	0	0.998	1.5	0.0407
XF37_11620	acetyltransferase	4	1.08	0.0126	-0.16	0.998	0.4	0.678	-0.11	1
XF37_11630	hypothetical protein	2	0.57	0.208	-0.05	0.998	1.38	0.0223	0.01	1
XF37_11635	general stress protein	5	4.3	1.34e-11	0.13	0.998	0.18	0.889	0.92	0.521
XF37_11640	hypothetical protein	5	1.39	0.0037	0.01	0.998	-0.47	0.533	0.09	1
XF37_11675	fimbrial protein	5	2.19	0.00136	-0.53	0.965	-0.2	0.857	0.92	0.419
XF37_11685	fimbrial protein	4	-1.58	0.00631	-1.67	0.134	1.15	0.25	-0.23	1
XF37_11710	hypothetical protein	2	-2.51	0.00591	0.47	0.998	0.76	0.602	1.06	0.705
XF37_11720	tagatose-bisphosphate aldolase	2	-1.77	0.029	-0.61	0.976	-0.85	0.41	1.1	0.402
XF37_11740	PTS system N-acetylgalactosamine-specific transporter subunit IID	2	-1.78	0.0174	0.94	0.838	-0.51	0.602	-0.4	1
XF37_11745	PTS system N-acetylgalactosamine-specific transporter subunit IIC	4	-0.88	0.107	-1.12	0.549	-1.17	0.281	-2.77	0.0481
XF37_11780	galactonate transporter	2	-1.05	0.00536	0.68	0.558	2.77	1.45e-05	-0.97	0.312
XF37_11785	alpha-dehydro-beta-deoxy-D-glucarate aldolase	2	-0.83	0.08	0.08	0.998	2.79	6.64e-05	-1.15	0.268
XF37_11790	tartronate semialdehyde reductase	2	-0.99	0.0262	-0.09	0.998	2.23	0.000464	-1.42	0.0991
XF37_11800	hypothetical protein	3	-7.02	4.3e-08	3.53	0.0713	-2.13	0.0748	1.27	0.615
XF37_11805	hypothetical protein	3	-5.63	2.89e-07	-0.16	0.998	-0.01	0.996	-0.59	0.939
XF37_11815	transcriptional regulator	3	-2.28	0.000412	0.21	0.998	-0.84	0.462	-2.37	0.0427
XF37_11820	threonine dehydratase	3	-3.8	2.58e-08	0.01	0.998	-2.7	0.0106	-0.14	1
XF37_11825	septum site-determining protein	3	-4.17	1.24e-09	0.7	0.743	-0.55	0.587	-0.35	1
XF37_11830	propionate kinase	3	-4.25	1.89e-10	0.26	0.998	-0.49	0.657	0.44	1
XF37_11835	pyruvate formate-lyase	3	-3.69	4.55e-08	0.16	0.998	-0.67	0.46	-0.51	0.939
XF37_11840	endoribonuclease L-PSP	2	-3.05	6.36e-07	0.21	0.998	-0.94	0.181	-0.42	0.953
XF37_11845	serine dehydratase	3	-2.51	3.24e-06	0.67	0.745	-0.87	0.385	-1.18	0.34
XF37_11860	hypothetical protein	5	1.9	7e-05	-0.37	0.96	-0.76	0.374	0.67	0.814
XF37_11865	pirin	5	2.91	0.00182	1.18	0.602	0.6	0.475	2.03	0.00901
XF37_11875	membrane protein	4	1.7	0.0129	-3	0.00301	-0.89	0.462	-0.41	1
XF37_11885	glutathionyl-hydroquinone reductase YqjG	5	1.72	2.41e-08	0.21	0.927	-0.57	0.502	0.21	1
XF37_11890	membrane protein	4	1.79	0.00294	-0.35	0.995	0.53	0.553	0.76	0.654
XF37_11895	membrane protein	5	1.42	0.00401	0.07	0.998	0.27	0.738	0.24	1
XF37_11900	membrane protein	5	1.15	4.52e-05	0.2	0.976	-0.08	0.932	0.55	0.684
XF37_11905	hypothetical protein	5	1.23	4.44e-07	0.12	0.981	-0.21	0.858	0.26	1
XF37_11915	EnvZ/OmpR regulon moderator	2	-1.04	0.00172	0.48	0.722	-0.28	0.783	0	1
XF37_11930	hexuronate transporter	4	2.27	2.21e-05	-0.36	0.974	1.2	0.0337	-0.35	0.997
XF37_11935	glucuronate isomerase	4	3.23	2.24e-12	-0.68	0.121	2.64	0.000688	0.46	1
XF37_11940	altronate hydrolase	4	2.2	1.33e-05	-0.29	0.983	2.31	0.000354	0.11	1
XF37_11950	serine/threonine protein kinase	5	2.08	5.01e-08	-0.26	0.944	0.16	0.86	-0.24	1
XF37_11975	hypothetical protein	2	-1.4	0.012	-0.22	0.998	1.53	0.0184	0.58	0.827
XF37_11985	mRNA interferase HigB	2	-1.36	0.00241	0.67	0.697	-0.87	0.274	1.09	0.346
XF37_11995	2,4-dienoyl-CoA reductase	5	2.95	6.17e-10	-0.46	0.627	-1.32	0.0582	0	1
XF37_12005	hypothetical protein	2	-2.7	0.00163	0.8	0.914	0.28	0.882	-0.36	1
XF37_12020	beta-D-galactosidase	2	-1.19	0.0468	0.02	0.998	-0.3	0.805	0.1	1
XF37_12030	methionyl-tRNA synthetase	5	1.85	0.0337	-0.19	0.998	-0.91	0.564	1.35	0.547
XF37_12035	putrescine--2-oxoglutarate aminotransferase	5	3.76	5.19e-15	0.21	0.789	0.48	0.52	0.4	0.943
XF37_12040	aerotaxis receptor Aer	2	-1.21	0.0289	-0.21	0.998	0.07	0.966	-0.22	1
XF37_12065	RNA polymerase sigma factor RpoD	2	-1.13	3.44e-08	0.21	0.677	-0.42	0.668	0.08	1
XF37_12075	30S ribosomal protein S21	2	-0.97	0.139	0.13	0.998	1.62	0.0079	-0.06	1
XF37_12100	LysR family transcriptional regulator	2	-2.01	0.00185	0.13	0.998	-0.96	0.583	0.72	1
XF37_12145	heptose 1-phosphate adenyltransferase	2	-1.5	0.00282	0.6	0.857	-0.22	0.823	0.13	1
XF37_12160	membrane protein	2	-1.88	0.00103	-0.32	0.998	-0.85	0.352	-0.13	1
XF37_12165	membrane protein	1	-1.45	0.00329	0.57	0.862	-1.29	0.0397	-0.03	1
XF37_12170	glycogen synthesis protein GlgS	5	1.53	0.000296	0.38	0.915	-1.05	0.146	0.49	0.947
XF37_12175	hypothetical protein	1	-1.02	0.00899	0.13	0.998	-0.86	0.382	0.02	1
XF37_12195	dioxygenase	5	3.21	6.29e-05	1.03	0.511	0.6	0.494	1.64	0.0522
XF37_12200	hypothetical protein	2	-1	0.00112	0.04	0.998	-0.46	0.488	0.6	0.646
XF37_12210	hypothetical protein	3	-3.36	0.000149	0.46	0.998	-0.58	0.54	1.34	0.122
XF37_12240	DNA topoisomerase IV subunit B	2	-1.68	2.15e-06	0	0.999	0.38	0.717	-0.26	1
XF37_12265	preprotein translocase subunit YidC	2	-1.77	0.00125	0.81	0.691	-0.19	0.861	0.4	0.999
XF37_12290	transcriptional regulator	4	1.28	0.00169	0.22	0.998	1.06	0.196	0.14	1
XF37_12295	hypothetical protein	1	0.18	0.684	1.62	0.0176	-1.26	0.0279	0.63	0.691
XF37_12320	cell division protein FtsI	2	-1.04	0.0462	-0.11	0.998	0.66	0.424	-0.79	0.636
XF37_12325	hypothetical protein	2	-2.52	1.15e-08	0.06	0.998	1.46	0.0706	-0.11	1
XF37_12345	2,5-diketo-D-gluconic acid reductase	5	2.17	6.97e-11	0.14	0.976	-1.07	0.167	-0.14	1
XF37_12350	aldehyde reductase	2	-0.05	0.912	0.71	0.622	0.76	0.329	1.97	0.0126
XF37_12370	cystathionine beta-lyase	4	2.47	2.47e-09	-0.58	0.391	1.65	0.0137	0.25	1
XF37_12390	oxidoreductase	5	3.94	2.26e-12	-0.08	0.998	-0.42	0.749	0.55	0.987
XF37_12395	hypothetical protein	2	-1.15	0.00339	-0.07	0.998	-0.89	0.184	0.64	0.73
XF37_12400	L-glyceraldehyde 3-phosphate reductase	5	1.3	8.98e-05	-0.45	0.734	-0.56	0.419	0.19	1
XF37_12405	dienelactone hydrolase	5	1.45	0.000204	-0.13	0.998	-0.67	0.285	-0.27	1
XF37_12415	hypothetical protein	3	-4.39	9.86e-09	-1.59	0.195	-1.43	0.2	-0.51	1
XF37_12420	hydrogenase 2 small subunit	3	-3.42	1.84e-08	-0.22	0.998	-1.01	0.113	0.08	1
XF37_12425	hydrogenase 2 protein HybA	3	-3.83	3.29e-09	-1.03	0.516	0.03	0.985	0.55	0.984
XF37_12430	hydrogenase 2 b cytochrome subunit	3	-4	1.23e-09	-0.64	0.84	-0.54	0.786	-1.22	0.696
XF37_12435	hydrogenase 2 large subunit	2	-3.1	1.84e-07	-0.1	0.998	-0.15	0.898	-0.24	1
XF37_12445	hydrogenase 2-specific chaperone	1	-1.5	0.004	-0.94	0.601	-0.13	0.934	-0.3	1
XF37_12450	hydrogenase nickel incorporation protein	2	-1.33	0.00204	-0.71	0.667	-0.04	0.982	-1.09	0.604
XF37_12465	glutathionylspermidine synthase	2	-1.49	6.86e-06	-0.03	0.998	-0.1	0.933	0.02	1
XF37_12470	phosphate transporter PitA	2	-1.82	0.00593	0.06	0.998	0.96	0.361	-1.59	0.147
XF37_12490	transposase	2	-0.29	0.713	-0.07	0.998	2.72	0.000194	-2.15	0.0395
XF37_12500	NA	5	1.33	7.89e-07	0.63	0.0538	-0.27	0.771	0.31	1
XF37_12505	NA	5	4.3	3.97e-08	-0.21	0.998	1.53	0.0233	0.49	0.925
XF37_12510	NA	5	4.66	3.59e-10	-0.73	0.474	1.64	0.127	0.66	0.968
XF37_12520	selenocysteine synthase	2	-1.26	0.000153	-0.2	0.997	-0.06	0.954	-0.11	1
XF37_12525	selenocysteinyl-tRNA-specific translation factor	2	-1.83	1.03e-05	0.05	0.998	-0.36	0.598	0.24	1
XF37_12540	aldehyde dehydrogenase	5	1.82	6.62e-08	-0.33	0.722	-0.27	0.795	-0.34	1
XF37_12550	membrane protein	3	-5.27	4.03e-09	4.92	2.07e-05	0.06	0.975	0.53	1
XF37_12555	membrane protein	2	-1.67	0.00256	0.69	0.829	-0.06	0.969	-0.31	1
XF37_12580	transcriptional regulator	5	1.01	0.013	-0.56	0.769	-0.47	0.556	-0.38	0.996
XF37_12585	electron transporter	2	-1.87	0.0056	1.1	0.61	0.49	0.531	0.31	1
XF37_12590	hypothetical protein	5	3.45	7.74e-09	0.4	0.843	1.51	0.0261	0.45	0.968
XF37_12600	alpha-amylase	2	-1.23	0.000171	-0.1	0.998	0.14	0.898	-0.44	0.96
XF37_12605	hypothetical protein	4	2.21	3.76e-12	-0.39	0.343	1.19	0.0897	0.74	0.657
XF37_12620	xylose transporter	2	0	0.996	-0.99	0.46	2.01	0.000353	-1.36	0.062
XF37_12625	D-xylose transporter subunit XylF	4	0.84	0.00169	-1.01	0.0736	2.13	0.00212	-2.59	0.00374
XF37_12630	xylose isomerase	2	0.34	0.141	-0.55	0.409	1.04	0.0982	-1.62	0.0427
XF37_12660	glycyl-tRNA synthetase	2	-1.23	6.64e-05	-0.04	0.998	0.65	0.367	0.26	1
XF37_12665	glycyl-tRNA ligase	2	-1.52	1.33e-06	-0.06	0.998	0.05	0.967	-0.04	1
XF37_12675	cold-shock protein	2	-2	1.03e-05	0.96	0.248	1.39	0.0989	1.03	0.513
XF37_12680	transcriptional regulator	5	1.3	4.82e-05	0.87	0.0786	-1.19	0.179	-0.11	1
XF37_12695	membrane protein	2	-1.76	0.000372	-0.08	0.998	0.77	0.315	0.53	0.892
XF37_12715	hypothetical protein	5	1.5	1.24e-05	-0.02	0.998	0.05	0.962	-0.34	1
XF37_12725	hypothetical protein	2	-1.34	0.00189	0.24	0.998	0.21	0.86	-0.1	1
XF37_12745	DNA-binding protein	2	-1.11	0.204	1.32	0.637	1.3	0.203	-2.33	0.0375
XF37_12780	hypothetical protein	5	4.93	3.52e-07	0.29	0.998	2.51	5.92e-05	1.02	0.238
XF37_12785	hypothetical protein	5	1.03	2.4e-05	0.09	0.998	-0.1	0.939	-0.07	1
XF37_12830	hypothetical protein	4	1.56	0.0208	-1.53	0.288	1.27	0.171	-2.28	0.0254
XF37_12855	eae-like protein	4	-1.57	0.0244	-1.06	0.656	0.79	0.341	-2.16	0.0197
XF37_12870	replication protein	5	1.24	0.0138	-0.5	0.882	-0.48	0.785	1.6	0.285
XF37_12880	hypothetical protein	5	1.38	0.003	-1.18	0.261	-0.24	0.839	0.56	0.888
XF37_12885	tail protein	1	0.43	0.698	-1.5	0.637	-3.88	2.59e-06	1.33	0.276
XF37_12900	tail protein	3	-2.33	0.000979	2.44	0.026	-0.03	0.982	-0.72	0.884
XF37_12920	enterobacterial Ail/Lom family protein	1	0.28	0.694	-0.98	0.605	-2.76	0.0312	3.01	0.0395
XF37_12930	lysozyme	4	1.03	0.0457	-0.88	0.629	0.83	0.534	-1.85	0.21
XF37_12940	hypothetical protein	2	0.74	0.445	1.52	0.446	1.42	0.0436	0.13	1
XF37_12960	holin	2	0.61	0.288	-0.1	0.998	0.9	0.354	1.96	0.0297
XF37_12965	lysozyme	4	0.98	0.0822	-0.27	0.998	1.25	0.0438	0.25	1
XF37_12980	peptidase M66	2	-1.17	1.05e-06	-0.05	0.998	-0.23	0.832	0.11	1
XF37_12985	general secretion pathway protein GspC	2	-1.78	5.12e-05	-0.01	0.998	0.08	0.946	0.05	1
XF37_12995	general secretion pathway protein GspE	2	-1.03	0.000206	-0.13	0.998	-0.64	0.297	0.19	1
XF37_13020	type II secretion system protein J	2	-1.03	0.00476	-0.15	0.998	0	0.998	-0.08	1
XF37_13060	hemolysin D	3	-4.39	1.07e-09	1.56	0.111	-2.33	0.00265	1.3	0.269
XF37_13065	exotoxin	2	-1.71	2.22e-05	0.37	0.931	-0.55	0.446	-0.03	1
XF37_13070	peptidase C39	3	-3.34	1.8e-07	0.96	0.529	-1.31	0.0497	-0.14	1
XF37_13075	hemolysin D	3	-2.72	9.96e-08	0.4	0.943	-1.83	0.00749	-0.66	0.826
XF37_13085	hypothetical protein	1	0.91	0.187	-0.5	0.981	-2.5	0.0214	0.56	1
XF37_13105	hypothetical protein	5	1.06	0.00184	-0.11	0.998	-0.17	0.903	0.83	0.707
XF37_13110	hypothetical protein	5	1.17	0.0143	-0.51	0.914	-0.49	0.634	-0.11	1
XF37_13115	hypothetical protein	5	1.26	0.00599	-0.26	0.998	-0.35	0.653	-0.19	1
XF37_13120	KfrA protein	4	2.25	1.17e-07	-0.33	0.888	1.02	0.141	-0.1	1
XF37_13145	hypothetical protein	2	-1.34	0.000816	0.49	0.84	1.05	0.23	0.26	1
XF37_13160	hypothetical protein	2	-1.58	0.0209	0.85	0.79	-0.33	0.826	0.1	1
XF37_13180	deoxyribodipyrimidine photolyase	2	-1.28	0.000282	0.24	0.988	-0.31	0.777	-0.04	1
XF37_13190	metal-binding protein	5	1.01	4.44e-05	-0.55	0.29	0.03	0.98	-0.2	1
XF37_13220	hypothetical protein	4	-0.01	0.989	-1.19	0.799	0.01	0.995	-2.58	0.0106
XF37_13240	type II citrate synthase	5	1.01	7.32e-05	-0.32	0.69	0.03	0.981	-0.14	1
XF37_13270	hypothetical protein	1	-0.48	0.17	-0.01	0.998	-1.16	0.0401	-0.28	1
XF37_13275	2-oxoglutarate dehydrogenase	1	-1.13	2.91e-07	-0.02	0.998	-1.6	0.00339	-0.19	1
XF37_13285	succinyl-CoA synthetase subunit beta	2	-1.39	3.16e-06	-0.27	0.808	-1.17	0.105	-0.19	1
XF37_13290	succinyl-CoA synthetase subunit alpha	2	-1.23	3.35e-06	0.15	0.989	-1.02	0.261	-0.51	1
XF37_13300	cob(I)alamin adenolsyltransferase/cobinamide ATP-dependent adenolsyltransferase	3	-2.78	0.00416	0.47	0.998	-0.42	0.759	-0.99	0.696
XF37_13305	fumarate hydratase	2	-1.17	0.0434	-0.25	0.998	0.09	0.946	-0.75	0.583
XF37_13330	glutamate mutase	2	-1.09	0.0388	0.52	0.939	-0.85	0.205	0.76	0.52
XF37_13335	glutamate mutase	1	-1.83	0.0297	-0.89	0.898	-0.07	0.961	0.36	1
XF37_13355	hypothetical protein	3	-4.17	3.69e-05	-1.13	0.852	1.64	0.0437	-0.5	0.991
XF37_13360	cytochrome d terminal oxidase subunit 1	2	-2.52	2.38e-11	-0.37	0.605	-0.09	0.946	-0.66	0.832
XF37_13365	cytochrome d ubiquinol oxidase subunit 2	2	-2.04	1.16e-09	-0.18	0.974	-0.36	0.719	-0.56	0.892
XF37_13375	hypothetical protein	2	-2.18	2.19e-07	0.21	0.998	0.34	0.728	-0.75	0.657
XF37_13380	acyl-CoA thioesterase	2	-1.53	0.000209	0.06	0.998	0.32	0.738	0.27	1	tolQRABpal gene cluster
XF37_13385	colicin uptake protein TolQ	2	-2.19	2.79e-10	-0.17	0.981	0.08	0.932	0.1	1
XF37_13390	colicin uptake protein TolR	2	-2.14	7.38e-07	0.07	0.998	-0.42	0.71	-0.06	1
XF37_13395	membrane protein	2	-1.52	2.75e-07	0.25	0.858	-0.5	0.723	-0.12	1
XF37_13400	translocation protein TolB	2	-1.64	1.71e-08	-0.01	0.998	-0.76	0.517	-0.22	1
XF37_13405	peptidoglycan-associated outer membrane lipoprotein	2	-1.1	3.27e-05	0.16	0.989	-0.13	0.921	0.1	1
XF37_13410	tol-pal system protein	2	-1.13	2.63e-05	0.14	0.991	-0.32	0.74	-0.18	1
XF37_13415	NA	4	1.33	0.000206	-0.57	0.629	1.78	0.00175	0.45	0.912
XF37_13420	NA	4	1.94	0.00205	-0.06	0.998	1.59	0.0144	0.35	1
XF37_13425	NA	2	0.75	0.222	-0.86	0.789	1.96	0.00463	0.54	0.893
XF37_13430	NA	4	1.25	0.216	-1.21	0.768	1.42	0.0386	1.05	0.22
XF37_13455	zinc transporter ZitB	5	2.17	2.23e-09	0.16	0.984	0.16	0.902	0.19	1
XF37_13460	hypothetical protein	5	4.18	2.24e-12	1.14	0.00268	-1.24	0.116	1.47	0.124
XF37_13470	phospho-2-dehydro-3-deoxyheptonate aldolase	2	-1.18	2.48e-05	0.01	0.998	-0.38	0.626	0.31	1
XF37_13495	UDP-galactose-4-epimerase	2	0.7	0.0335	-0.95	0.221	1.6	0.00278	-0.5	0.837
XF37_13520	molybdate ABC transporter permease	2	-1.41	0.00126	0.11	0.998	0.24	0.839	0.22	1
XF37_13525	molybdate transporter ATP-binding protein	2	-1.74	0.00189	0.1	0.998	-0.55	0.704	0.82	0.887
XF37_13530	pyridoxal phosphate phosphatase	2	-1.15	0.00562	-0.39	0.969	0.72	0.29	-0.23	1
XF37_13550	membrane protein	3	-3.44	0.000855	1.09	0.838	-0.18	0.92	2.9	0.0122
XF37_13560	acyl-CoA thioesterase	2	-2.63	1.49e-05	-0.33	0.998	-0.28	0.807	0.05	1
XF37_13565	integrase	2	-2.05	1.29e-06	-0.23	0.998	0.52	0.582	-0.31	1
XF37_13585	conjugal transfer protein TraR	5	1.78	4.12e-07	0.51	0.44	0.04	0.969	-0.26	1
XF37_13590	hypothetical protein	2	1.34	0.00626	1.16	0.189	0.57	0.513	0.21	1
XF37_13600	exonuclease	5	1.95	0.000265	0.13	0.998	0.29	0.758	-0.12	1
XF37_13605	recombinase	5	2.08	2.45e-07	0.51	0.537	0.06	0.955	0.49	0.892
XF37_13610	host-nuclease inhibitor protein Gam	5	1.71	3.08e-07	0.25	0.927	0.35	0.666	0	1
XF37_13615	protein kil	5	1.74	0.000105	0.46	0.83	-0.2	0.861	0.49	0.939
XF37_13625	superinfection exclusion protein	4	2.48	0.00134	0.72	0.854	3.81	0.00131	1.21	0.677
XF37_13630	hypothetical protein	5	2.89	1.47e-11	0.15	0.981	-0.74	0.358	-0.09	1
XF37_13660	hypothetical protein	5	1.46	0.0119	0.45	0.967	-0.38	0.727	0.66	0.838
XF37_13665	Replication protein O	5	1.13	0.00058	-0.08	0.998	-0.2	0.829	-0.13	1
XF37_13685	NA	4	1.91	0.0147	-1.52	0.284	3.4	1.93e-05	-0.84	0.719
XF37_13690	transposase	5	1.31	1.4e-07	0.37	0.304	0.42	0.747	0.08	1
XF37_13730	tail fiber protein	4	1.23	0.00608	-0.62	0.717	1.2	0.0645	-1.03	0.215
XF37_13770	type III effector	2	-2.92	7.93e-08	0.74	0.6	-0.9	0.179	-0.43	0.968
XF37_13775	E3 ubiquitin--protein ligase	2	-1.73	0.00226	-0.2	0.998	-0.47	0.643	-0.15	1
XF37_13780	tail assembly protein	2	-1.82	0.0273	1.51	0.54	0.7	0.393	0.02	1
XF37_13795	plasmid stabilization protein ParE	5	1.6	0.000288	0.51	0.775	-0.71	0.454	0.56	0.953
XF37_13800	stability determinant	5	1.57	5.75e-07	0.13	0.998	-0.77	0.41	0.26	1
XF37_13805	repressor	5	1.06	6.86e-06	0.13	0.981	-0.79	0.335	0.6	0.853
XF37_13845	hypothetical protein	1	0.06	0.941	-1.05	0.708	-2.23	0.0881	2.95	0.0395
XF37_13880	membrane protein	5	1.25	3.68e-05	0.68	0.204	-1.78	0.00565	-0.07	1
XF37_13885	dimethyl sulfoxide reductase	2	-1.22	0.00383	-0.05	0.998	-0.96	0.176	-0.08	1
XF37_13890	dimethyl sulfoxide reductase	2	-2.13	3.46e-06	0.03	0.998	-0.46	0.546	-0.1	1
XF37_13895	dimethyl sulfoxide reductase	2	-2.07	0.000962	-0.04	0.998	-0.09	0.948	-0.18	1
XF37_13920	transcriptional regulator	5	1.85	6.16e-06	-0.55	0.665	-0.3	0.81	-0.03	1
XF37_13935	hypothetical protein	7	4.26	3.64e-05	1.39	0.29	4.74	2.07e-08	4.34	7.88e-07
XF37_13940	hypothetical protein	7	1.46	0.226	2.19	0.35	3.26	0.00013	4.4	3.76e-05
XF37_13945	serine protease	5	2.27	2.29e-08	0.19	0.985	-0.5	0.565	1.03	0.308
XF37_13950	multidrug transporter	4	1.52	0.00603	-0.52	0.94	2.17	0.000876	-1.42	0.0659
XF37_13975	hypothetical protein	2	-1.6	1.6e-05	-0.07	0.998	0.68	0.405	-0.09	1
XF37_13995	transcriptional regulator	2	-1.81	2.64e-05	0.04	0.998	-0.52	0.606	0.02	1
XF37_14000	sensor protein RstB	2	-1.97	0.000772	0.45	0.981	-0.96	0.197	-0.22	1
XF37_14010	fumarate hydratase	5	2.4	7.31e-10	-0.03	0.998	-1	0.2	-0.07	1
XF37_14105	electron transporter RnfC	2	-2.21	3.91e-05	0.32	0.991	0.53	0.447	-0.3	1
XF37_14110	electron transporter RnfD	2	-1.43	0.000352	0	0.999	-0.35	0.786	0.22	1
XF37_14120	elongation factor G	2	-1.14	0.00655	-0.17	0.998	-0.74	0.233	0.17	1
XF37_14125	endonuclease III	2	-1.47	0.00283	0.02	0.998	-0.04	0.975	-1.37	0.211
XF37_14130	hypothetical protein	2	-2.66	0.000918	0.87	0.838	0.65	0.411	0.25	1
XF37_14135	peptide ABC transporter permease	2	-1.25	0.00204	0.28	0.981	-0.11	0.942	0.42	1
XF37_14145	pyridoxamine kinase	2	-1.82	0.000298	0.11	0.998	-0.11	0.915	0.32	1
XF37_14150	tyrosyl-tRNA synthetase	2	-1.42	9.57e-06	0.1	0.998	0.32	0.769	-0.42	1
XF37_14155	pyridoxamine 5'-phosphate oxidase	2	-1.1	0.000149	0.02	0.998	-0.11	0.937	0.19	1
XF37_14180	membrane protein	3	-4.57	3.03e-05	1.04	0.927	-0.91	0.478	0.9	0.745
XF37_14185	membrane protein	2	-2.89	0.000121	0.16	0.998	-0.15	0.904	0.94	0.41
XF37_14190	fusaric acid resistance protein	2	-1.34	0.00339	-0.03	0.998	0.04	0.974	0.29	1
XF37_14195	superoxide dismutase	5	4.63	9.04e-15	0.3	0.657	0.04	0.975	0.66	0.657
XF37_14200	oxidoreductase	5	1.12	0.0135	0.18	0.998	-0.52	0.546	0.33	1
XF37_14205	oxidoreductase	5	2.25	3.01e-07	0.43	0.722	-1.01	0.093	0.06	1
XF37_14210	transcriptional repressor NemR	1	1.53	0.00301	0.53	0.858	0.06	0.954	2.77	3.76e-05
XF37_14215	N-ethylmaleimide reductase	2	0.06	0.911	0.09	0.998	0.35	0.702	1.85	0.0147
XF37_14245	superoxide dismutase	1	-1.17	1.94e-06	-0.31	0.627	-2	0.00212	-0.4	1
XF37_14255	hypothetical protein	4	1.54	0.000797	-0.61	0.722	0.82	0.312	0.42	0.99
XF37_14265	transcriptional regulator	5	1.46	0.000484	-0.12	0.998	-0.07	0.966	0.01	1
XF37_14275	cyclopropane fatty acyl phospholipid synthase	5	1.77	4.48e-10	-0.07	0.998	-0.54	0.661	0.03	1
XF37_14305	monooxygenase	1	0.83	0.00076	-0.02	0.998	-1.8	0.000975	-0.17	1
XF37_14310	hypothetical protein	5	1.32	0.000973	0.66	0.526	-0.33	0.696	0.16	1
XF37_14340	hypothetical protein	1	-0.32	0.704	-1.51	0.471	-0.34	0.833	2.34	0.0322
XF37_14345	hypothetical protein	1	0.9	0.057	-0.11	0.998	-1.56	0.0385	0.02	1
XF37_14350	pyruvate kinase	2	-1.15	2.67e-05	0.47	0.44	-0.25	0.795	0.06	1
XF37_14355	murein lipoprotein	5	1.17	2.75e-07	0.17	0.858	-0.77	0.292	0.26	1
XF37_14360	murein L,D-transpeptidase	5	3.09	2.39e-13	0.73	0.0125	-1.49	0.0495	0.07	1
XF37_14390	iron-sulfur cluster assembly scaffold protein	5	1.55	0.000266	1.18	0.0663	-0.45	0.645	0.39	1
XF37_14395	hypothetical protein	4	1.4	0.0196	0.05	0.998	1.07	0.22	0.68	0.861
XF37_14425	transporter	1	-2.18	0.0112	-0.05	0.998	-0.42	0.769	0.94	0.636
XF37_14455	hypothetical protein	1	-0.15	0.842	0.18	0.998	-2.25	0.0302	1.01	0.699
XF37_14470	oxidoreductase	5	1.13	0.0159	-0.44	0.931	0.57	0.448	-1.38	0.0452
XF37_14480	short chain acyl-CoA synthetase	4	0.25	0.65	-3.47	0.000316	-0.6	0.589	0.05	1
XF37_14485	phosphoenolpyruvate synthase	2	-1.27	2.19e-07	-0.24	0.691	0.19	0.885	-0.3	1
XF37_14500	phospho-2-dehydro-3-deoxyheptonate aldolase	2	-0.64	0.0129	-0.24	0.959	2.24	5.01e-05	-0.67	0.568
XF37_14515	cyclic di-GMP regulator CdgR	1	-1.37	4.37e-05	0.2	0.991	-1.38	0.0162	-0.33	1
XF37_14540	integration host factor subunit alpha	5	2.11	2.67e-06	0.53	0.63	-0.44	0.576	0.77	0.523
XF37_14550	phenylalanyl-tRNA synthetase	2	-2	2.65e-06	0.25	0.989	0.21	0.875	0.11	1
XF37_14585	hypothetical protein	5	1.1	0.0497	0.3	0.998	0.24	0.815	1.2	0.16
XF37_14590	membrane protein	3	-3.63	1.87e-08	0.6	0.838	0.27	0.798	0.2	1
XF37_14595	6-phosphofructokinase	5	1.06	0.000396	-0.12	0.998	-0.85	0.337	-0.12	1
XF37_14600	hypothetical protein	5	1.49	4.88e-07	-0.38	0.622	-0.55	0.611	0.09	1
XF37_14605	hypothetical protein	5	1.5	4.14e-08	-0.09	0.998	-0.35	0.664	-0.14	1
XF37_14610	membrane protein	5	1.15	0.00194	0.33	0.939	-0.82	0.214	0.01	1
XF37_14625	L-cystine transporter tcyP	4	1.59	2.16e-05	-0.46	0.745	0.29	0.785	0.68	0.754
XF37_14635	cell division modulator	1	-1.12	0.0431	0.68	0.836	-1.14	0.297	0.28	1
XF37_14640	hydroperoxidase	5	2.05	3.86e-11	0.09	0.997	0.75	0.196	0.74	0.372
XF37_14670	PTS system N,N'-diacetylchitobiose-specific transporter subunit IIB	5	1.16	0.0188	-0.73	0.731	0.87	0.173	-0.11	1
XF37_14675	transcriptional regulator	5	3.75	4.65e-16	-0.49	0.0799	-0.42	0.709	0.22	1
XF37_14700	periplasmic protein	1	1.62	6.63e-08	0.84	0.0101	-1.24	0.0645	1.5	0.062
XF37_14705	succinylglutamate desuccinylase	5	1.47	4.03e-05	-0.06	0.998	-1.67	0.00167	-1.14	0.138	AST pathway (ast) operon
XF37_14710	succinylarginine dihydrolase	5	1.86	1.94e-08	0.07	0.998	-1.26	0.0428	-1.25	0.14
XF37_14715	succinylglutamate-semialdehyde dehydrogenase	5	2.71	3.84e-11	0.3	0.709	-0.9	0.298	-1.18	0.311
XF37_14720	arginine succinyltransferase	5	3.73	3.78e-10	0.16	0.998	-1.22	0.0271	-0.92	0.285
XF37_14725	acetylornithine aminotransferase	5	3.67	2.06e-13	0.31	0.629	-0.88	0.236	-1.1	0.287
XF37_14735	membrane protein	4	-0.97	0.222	-2.01	0.362	-0.23	0.855	-2.63	0.00471
XF37_14740	hypothetical protein	4	-1.44	0.00306	-1.01	0.503	0.05	0.97	-1.76	0.0195
XF37_14770	thiosulfate sulfurtransferase	2	-1.05	0.0237	-0.35	0.989	-0.13	0.902	-0.01	1
XF37_14790	glutamate dehydrogenase	2	0.16	0.391	-0.54	0.191	2.71	6.42e-06	-0.99	0.252
XF37_14795	hypothetical protein	4	-1.47	0.00675	-1.56	0.239	0.31	0.807	-0.71	0.766
XF37_14815	hypothetical protein	5	1.4	0.00816	-0.11	0.998	-0.46	0.623	0.67	0.733
XF37_14830	protease 4	2	-1.23	0.00297	-0.08	0.998	0.4	0.699	0.29	1
XF37_14840	cytoplasmic asparaginase I	2	-1.6	0.000379	0.23	0.998	0.92	0.212	-0.17	1
XF37_14860	oxidoreductase	2	-1.29	0.00546	0	0.999	-0.18	0.873	-0.69	0.709
XF37_14865	sugar kinase	2	-2.19	0.000259	0.53	0.959	-1.02	0.218	-0.01	1
XF37_14870	hypothetical protein	2	-1.67	1.35e-05	0.36	0.923	-0.63	0.359	-0.25	1
XF37_14900	glyceraldehyde-3-phosphate dehydrogenase	2	-1.55	5.91e-09	0.38	0.288	0.02	0.985	0	1
XF37_14905	glucose-6-phosphate 1-epimerase	2	-1.85	6.69e-05	0.14	0.998	-0.49	0.479	0.3	1
XF37_14920	serine/threonine protein kinase	5	3.12	9.04e-15	-0.3	0.431	1.07	0.0392	-1.33	0.0266
XF37_14925	hypothetical protein	5	3.09	2.64e-14	-0.28	0.54	0.86	0.248	-1.25	0.147
XF37_14930	membrane protein	2	-1.97	9.74e-07	0.14	0.998	0.57	0.52	-1.07	0.312
XF37_14935	diguanylate cylase	2	1.07	0.00159	-0.15	0.998	1.84	0.0195	-0.35	1
XF37_14945	hypothetical protein	4	0.54	0.157	-0.16	0.998	3.7	1.81e-08	0.62	0.622
XF37_14965	hypothetical protein	1	-0.11	0.758	0.46	0.802	-1.58	0.0348	1.7	0.0807
XF37_14975	diguanylate cyclase	2	-1.65	0.000166	0.1	0.998	-0.62	0.545	0.46	1
XF37_14980	membrane protein	3	-2.84	0.00144	1.27	0.637	-0.42	0.749	1.75	0.0706
XF37_14985	hypothetical protein	5	1.77	1.66e-07	-0.04	0.998	-0.84	0.234	-0.35	1
XF37_14990	hypothetical protein	4	3.94	3.62e-11	-1.26	0.0245	3.57	6.13e-07	-0.59	0.807
XF37_14995	hypothetical protein	6	5.48	1.17e-15	-1.02	0.00304	4.24	1.09e-06	-0.55	0.956
XF37_15005	LysR family transcriptional regulator	5	1.45	0.000562	-0.24	0.995	0.25	0.812	0.24	1
XF37_15010	tartrate dehydrogenase	2	0.38	0.657	-0.53	0.998	1.51	0.022	-0.71	0.653
XF37_15020	dioxygenase	5	1.01	0.0274	-0.53	0.91	0.17	0.864	-0.8	0.526
XF37_15035	long-chain fatty acid--CoA ligase	5	2.06	2.33e-10	-0.21	0.852	-1.08	0.154	-0.01	1
XF37_15040	membrane protein	5	1.38	1.66e-07	0.17	0.96	-0.08	0.95	-0.02	1
XF37_15045	hypothetical protein	2	-1.25	0.00148	-0.41	0.942	0.95	0.186	0.48	0.943
XF37_15070	aminodeoxychorismate synthase	2	-2.87	4.49e-05	0.92	0.745	-0.1	0.945	0.22	1
XF37_15080	serine dehydratase	2	-1.93	4.82e-06	0.27	0.98	-1.16	0.0987	-0.08	1
XF37_15115	hypothetical protein	4	-1.45	0.0339	-1.84	0.224	0.23	0.806	-1.99	0.00339
XF37_15120	membrane protein	2	-0.79	0.121	1.25	0.25	4.39	9.31e-06	-2.35	0.0427
XF37_15125	hypothetical protein	2	-0.23	0.5	0.03	0.998	2.98	0.00488	-2.22	0.0694
XF37_15150	hypothetical protein	1	-2.65	0.000109	-0.76	0.852	-1.14	0.207	-0.1	1
XF37_15155	PhoPQ regulatory protein	4	-0.48	0.589	-2.12	0.354	-1.79	0.0195	-0.37	1
XF37_15170	multidrug MFS transporter	2	-1.13	0.013	0.38	0.976	0.96	0.179	0.91	0.438
XF37_15180	carboxy-terminal protease	2	-1.71	5.49e-08	0.09	0.998	-0.6	0.522	0.11	1
XF37_15185	prop expression regulator	2	-1.63	4.76e-07	0.08	0.998	0.27	0.791	-0.04	1
XF37_15200	hypothetical protein	2	-1.72	4.72e-06	0.09	0.998	-0.1	0.929	0.11	1
XF37_15205	RNA methyltransferase RsmF	2	-1.71	5.84e-05	0.05	0.998	0.76	0.405	0.18	1
XF37_15210	hypothetical protein	4	2.53	1.38e-07	0.27	0.968	1.09	0.316	1	0.672
XF37_15215	hypothetical protein	5	1.86	0.0023	0.1	0.998	0.33	0.737	0.25	1
XF37_15225	hypothetical protein	5	1.9	0.0025	1.22	0.288	-0.45	0.59	0.94	0.373
XF37_15230	hypothetical protein	2	-1.24	0.000349	0.17	0.998	-0.86	0.274	-0.18	1
XF37_15235	membrane protein	2	-1.24	0.00438	-0.13	0.998	-0.38	0.625	0.05	1
XF37_15280	damage-inducible protein YebG	5	1.27	0.000587	-0.07	0.998	-0.15	0.901	0.36	1
XF37_15285	phosphoribosylglycinamide formyltransferase	4	1.1	0.0343	0.17	0.998	1.84	0.0293	-1.41	0.176
XF37_15355	hypothetical protein	3	-1.67	0.0162	-0.98	0.717	-0.99	0.223	0.12	1
XF37_15370	dihydroneopterin triphosphate pyrophosphatase	2	-1.12	0.000716	-0.23	0.989	0.28	0.768	-0.48	0.922
XF37_15375	aspartyl-tRNA synthetase	2	-1.26	3.69e-06	-0.38	0.663	0.8	0.367	-0.12	1
XF37_15380	hydrolase	4	1.15	0.00527	-0.64	0.687	2.1	0.00208	0.59	0.852
XF37_15480	cystine transporter subunit	5	1.34	6.68e-06	-0.6	0.342	0.17	0.858	0.11	1
XF37_15495	flagellin	2	-2.07	2.41e-10	0.07	0.998	-0.81	0.25	-0.31	1	Flagella formation (fli) operon
XF37_15500	flagellar capping protein	2	-2.45	4.56e-08	0.16	0.998	-0.61	0.528	-0.22	1
XF37_15505	flagellar protein FliS	2	-2.38	5.92e-07	0.13	0.998	-0.67	0.411	-0.02	1
XF37_15510	flagellar biosynthesis protein FliT	2	-1.85	0.00169	0.77	0.789	0.53	0.553	-1.37	0.0907
XF37_15570	flagellar hook-basal body protein FliE	3	-3.47	1.02e-05	3.38	0.0019	1.01	0.232	-2.5	0.0126
XF37_15575	flagellar MS-ring protein	4	-2.06	0.00189	-2.11	0.0928	0.21	0.909	-1.54	0.302
XF37_15590	ATP synthase	3	-1.9	0.0298	2.44	0.155	0.7	0.424	0.62	0.802
XF37_15595	flagellar biosynthesis chaperone	2	-2.54	0.0138	-0.26	0.998	1.46	0.0772	-2	0.0427
XF37_15605	flagellar basal body-associated protein FliL	2	-2.75	0.00425	0.12	0.998	-0.27	0.829	-1.34	0.248
XF37_15615	flagellar motor switch protein FliN	2	-2.35	0.000222	0.98	0.596	-0.62	0.743	-0.3	1
XF37_15635	flagellar biosynthesis protein FliR	2	-0.39	0.753	0.76	0.976	1.89	0.00627	-2.05	0.0337
XF37_15645	hypothetical protein	5	1.57	0.00461	0.29	0.998	-0.49	0.521	0.29	1
XF37_15650	hypothetical protein	5	3.17	2.49e-07	0.96	0.229	-1.12	0.0898	0.21	1
XF37_15655	mannosyl-3-phosphoglycerate phosphatase	5	1.65	9.25e-06	0.51	0.579	0.21	0.812	0.03	1
XF37_15710	hypothetical protein	1	-0.49	0.237	-0.36	0.979	-1.63	0.00719	-0.32	1
XF37_15715	chaperone protein HchA	1	-0.71	0.0323	-0.1	0.998	-1.4	0.0162	-0.92	0.347
XF37_15720	histidine kinase	2	-2.24	1.7e-05	0.18	0.998	-0.22	0.812	0.66	0.678
XF37_15740	sulfite oxidase subunit YedZ	2	-1.16	7.33e-05	-0.06	0.998	-0.15	0.898	0.17	1
XF37_15745	zinc/cadmium-binding protein	3	-2.65	4.31e-07	1.74	0.0153	-1.76	0.0155	0.67	0.848
XF37_15750	cytochrome B561	2	-1.67	7.94e-07	0.28	0.931	0.48	0.602	0.24	1
XF37_15760	secretion protein EspJ	1	-1.47	0.015	0.04	0.998	-1.67	0.0156	0.42	1
XF37_15775	tail fiber protein	5	1.1	0.0492	-0.2	0.998	-0.29	0.781	0.32	1
XF37_15830	hypothetical protein	2	-1.87	0.0139	-0.97	0.806	1.18	0.198	-0.09	1
XF37_15835	hypothetical protein	2	-2.49	2.71e-05	1.47	0.175	0.34	0.797	-0.15	1
XF37_15840	hypothetical protein	3	-2.22	0.0169	2.42	0.0982	0.77	0.523	1.05	0.636
XF37_15845	hypothetical protein	2	-1.04	0.133	0.44	0.989	0.76	0.341	-2.45	0.00405
XF37_15850	cell division inhibition protein DicB	4	-1.15	0.126	-2.79	0.0538	2.28	0.0179	-3.34	0.00512
XF37_15875	transposase	2	0.13	0.826	0.27	0.998	1.83	0.00567	-0.06	1
XF37_15895	rhsA	4	1.21	0.00164	-0.19	0.998	0.5	0.514	-0.19	1
XF37_15935	hypothetical protein	5	1.61	3e-08	0	0.998	0.23	0.85	-0.28	1
XF37_15940	antiporter	5	1.45	1.12e-07	-0.21	0.83	-0.18	0.861	-0.53	0.799
XF37_15945	lipoprotein	2	-1.02	0.0164	0.62	0.738	-0.04	0.972	0.09	1
XF37_15960	D-alanyl-D-alanine dipeptidase	4	2.17	1.22e-06	-0.05	0.998	2.66	0.000163	-1.23	0.245
XF37_15965	peptide ABC transporter substrate-binding protein	4	2.14	8.17e-06	0.02	0.998	2.07	0.000978	-1.69	0.0427
XF37_15970	peptide ABC transporter permease	4	1.36	0.0444	0.47	0.981	1.66	0.0139	-2.29	0.004
XF37_15975	D-ala-D-ala transporter subunit	5	2.28	2.45e-05	-0.9	0.479	1.25	0.101	-1.67	0.0611
XF37_15980	peptide ABC transporter substrate-binding protein	4	1.41	0.00831	0.19	0.998	1.64	0.00966	-1.38	0.0997
XF37_15985	peptide ABC transporter ATP-binding protein	4	1.58	0.0105	-0.26	0.998	1.59	0.0247	-1.56	0.102
XF37_15990	peroxiredoxin OsmC	5	2.59	6.32e-11	-0.14	0.989	-0.96	0.223	0.5	0.955
XF37_15995	biofilm-dependent modulation protein	5	6.1	9.01e-15	-1.4	0.00188	-0.11	0.932	-0.16	1
XF37_16000	30S ribosomal subunit S22	5	3.38	4.13e-10	0.08	0.998	-0.73	0.317	0.59	0.813
XF37_16005	NAD-dependent malic enzyme	2	-1.27	1.68e-06	-0.25	0.877	-0.65	0.315	0.1	1
XF37_16010	ethanol-active dehydrogenase/acetaldehyde-active reductase	1	-1.15	1.09e-05	0.6	0.208	-1.1	0.137	-0.02	1
XF37_16015	XRE family transcriptional regulator	5	1.65	0.00502	-0.41	0.981	-0.2	0.848	0.66	0.684
XF37_16030	formate dehydrogenase	3	-3.34	0.000446	0.57	0.998	-0.27	0.843	-1.75	0.0635
XF37_16035	sulfate ABC transporter substrate-binding protein	3	-5.73	1.08e-09	0.71	0.889	0.01	0.998	-0.07	1
XF37_16040	aromatic amino acid exporter	2	-2.04	0.000964	-0.31	0.998	-0.75	0.389	-0.43	0.984
XF37_16060	hypothetical protein	3	-4.06	4.38e-06	-0.18	0.998	0.28	0.857	-1.62	0.199
XF37_16065	nitrate/nitrite transporter NarK	4	3.29	9.04e-15	-0.06	0.998	1.74	0.00297	-0.79	0.475
XF37_16070	nitrate reductase	4	3.13	6.63e-15	-0.04	0.998	1.62	0.0322	-0.93	0.506
XF37_16075	nitrate reductase	4	3.51	8.34e-14	0.04	0.998	1.97	0.00286	-0.89	0.475
XF37_16080	nitrate reductase	4	3.45	4.61e-11	-0.04	0.998	2.14	0.0017	-1.16	0.271
XF37_16085	nitrate reductase	4	3.72	2.34e-07	-0.15	0.998	2.16	0.000973	-0.85	0.538
XF37_16105	flavin reductase	5	2.37	5.14e-05	0.31	0.989	0.07	0.957	-0.01	1
XF37_16135	tail fiber protein	5	1.19	0.0427	-0.38	0.981	-0.22	0.861	1.06	0.293
XF37_16145	NA	4	2.74	0.000184	0	0.999	1.93	0.0103	-0.24	1
XF37_16155	DNA methylase	5	1.2	0.00355	0.07	0.998	0.46	0.665	0.53	0.968
XF37_16175	protein ninG	5	1.32	0.000461	-0.24	0.989	0.67	0.326	-0.95	0.313
XF37_16180	DNA-binding protein	5	1.11	0.000387	0.14	0.998	0.31	0.781	-0.43	1
XF37_16200	NA	4	2.95	0.00608	0.64	0.981	4.37	0.000905	0.28	1
XF37_16210	exonuclease	2	-1.81	0.000593	-0.18	0.998	-0.01	0.998	-0.19	1
XF37_16230	secretion protein EspO	3	-2.3	2.57e-06	0.33	0.981	-1.73	0.00521	1.2	0.182
XF37_16260	50S ribosomal protein L31 type B	1	-0.06	0.939	2.51	0.0108	-1.15	0.141	0.1	1
XF37_16280	hypothetical protein	3	-1.48	0.013	0.65	0.903	-0.06	0.97	-1.88	0.117
XF37_16300	hypothetical protein	3	-2.51	0.000519	2.05	0.0843	-1.1	0.292	0.01	1
XF37_16310	aldehyde oxidoreductase	5	2.47	5.45e-07	-0.09	0.998	0.09	0.954	0.85	0.693
XF37_16315	xanthine dehydrogenase	5	2.42	1.44e-08	0.25	0.944	0.12	0.899	0.92	0.268
XF37_16320	xanthine dehydrogenase	5	2.14	3.2e-07	0.49	0.602	0.08	0.947	0.74	0.545
XF37_16325	transposase	3	-3.25	0.000154	2.9	0.0117	-1.81	0.0836	0.62	0.992
XF37_16335	hypothetical protein	2	-2.91	0.00429	-0.13	0.998	-0.74	0.274	0.58	0.707
XF37_16340	helicase	2	-1.14	0.000853	-0.16	0.998	-0.49	0.534	0.29	1
XF37_16345	hypothetical protein	2	-1.54	0.00508	0.09	0.998	0.73	0.309	-1.03	0.275
XF37_16350	transcriptional regulator	2	-1.1	0.0267	-0.36	0.989	0.4	0.672	0.22	1
XF37_16365	transposase	1	0.35	0.579	-0.23	0.998	-0.14	0.943	2.55	0.0262
XF37_16380	hypothetical protein	2	-1.93	0.000156	0.53	0.888	-0.6	0.497	-0.52	0.904
XF37_16440	hypothetical protein	5	1.5	0.0159	0.91	0.58	-0.94	0.446	0.5	1
XF37_16445	cell division inhibition protein DicB	5	1.2	0.0233	0.89	0.44	-0.6	0.645	-0.41	1
XF37_16450	hypothetical protein	3	-2.77	3.4e-06	-0.13	0.998	-2.47	0.00302	-0.15	1
XF37_16460	hypothetical protein	2	-2.37	3.81e-05	0.74	0.745	0.13	0.938	-0.65	0.916
XF37_16485	transcriptional regulator	1	-0.03	0.949	-0.41	0.964	-1.86	0.00244	-0.58	0.806
XF37_16505	damage-inducible protein DinI	5	1.23	0.000617	-0.58	0.629	-0.21	0.839	-0.29	1
XF37_16510	histidine kinase	2	-1.51	0.000872	0.21	0.998	0	0.998	0.19	1
XF37_16515	two-component response-regulatory protein YehT	2	-1.34	0.00231	-0.31	0.991	-0.12	0.912	0.21	1
XF37_16545	hypothetical protein	2	-1.47	0.000448	0.17	0.998	-0.15	0.903	0.21	1
XF37_16550	hypothetical protein	2	-1.52	0.0242	0.05	0.998	1.67	0.111	-1.63	0.23
XF37_16565	hypothetical protein	2	-2.01	0.0319	2.66	0.0713	0.63	0.484	-1.47	0.172
XF37_16580	WGR domain protein	2	-1.05	0.0192	-0.21	0.998	-0.58	0.556	0.61	0.892
XF37_16595	methionine--tRNA ligase	2	-1.12	4.34e-06	-0.23	0.898	1.44	0.0669	0.17	1
XF37_16615	hypothetical protein	2	-2.46	1.72e-05	1.22	0.244	0.89	0.396	-1.37	0.387
XF37_16630	pilus assembly protein	3	-2.13	0.00136	0.17	0.998	-1.98	0.0118	0.84	0.631
XF37_16640	nickel/cobalt efflux protein RcnA	5	1.53	0.00065	0.14	0.998	-0.19	0.908	-0.43	1
XF37_16645	transcriptional repressor RcnR to maintain nickel and cobalt homeostasis	5	1.56	0.00171	-0.18	0.998	0.15	0.903	0.8	0.604
XF37_16650	membrane protein	2	-1.3	0.0306	-0.13	0.998	-0.37	0.815	-0.83	0.829
XF37_16655	hypothetical protein	3	-3.58	2.26e-09	0.29	0.989	-2.04	0.000455	1.97	0.0041
XF37_16660	transcription factor	2	-1.71	0.00861	1.26	0.479	0.29	0.762	0.77	0.537
XF37_16705	tagatose-bisphosphate aldolase	4	0.7	0.25	0.08	0.998	0.53	0.606	-2.05	0.0176
XF37_16725	PTS galactitol transporter subunit IIC	4	1.17	0.0251	-0.28	0.998	1.07	0.17	-0.64	0.802
XF37_16740	lipid kinase	5	1.28	0.000166	0.54	0.528	-0.34	0.745	0.35	1
XF37_16745	hypothetical protein	4	2.62	2.57e-06	-2.54	0.00304	-0.76	0.427	-0.33	1
XF37_16750	hypothetical protein	4	2.82	0.0021	-2.18	0.11	2.66	0.00208	-0.84	0.765
XF37_16920	tail fiber protein	3	-3.43	0.00231	1.87	0.526	-0.24	0.881	-0.9	0.73
XF37_16965	protease	2	-2.09	0.000141	0.58	0.888	0.81	0.489	0.02	1
XF37_16970	hypothetical protein	5	2.36	2.53e-06	0.37	0.922	-0.61	0.554	0.14	1
XF37_17030	3-methyladenine DNA glycosylase	5	1.07	0.0328	-0.03	0.998	-0.03	0.982	0.47	1
XF37_17040	uridine kinase	2	-1.96	6.82e-06	0.17	0.998	0.89	0.206	0.25	1
XF37_17055	XRE family transcriptional regulator	5	1.34	0.00396	0.24	0.998	-1.78	0.0114	0.94	0.522
XF37_17060	toxin RelE	1	0.52	0.198	0.13	0.998	-1.88	0.0029	0.31	1
XF37_17065	membrane protein	2	-1.52	1.15e-05	0.04	0.998	-0.19	0.873	-0.02	1
XF37_17095	glycosyl transferase	1	-0.23	0.664	-0.04	0.998	-1.18	0.0849	1.66	0.049	Colanic acid (wca) gene cluster
XF37_17100	colanic acid biosynthesis protein	2	-1.44	0.00122	-0.3	0.995	-1.28	0.0386	1.24	0.151
XF37_17105	glycosyl transferase	2	-1.52	0.000411	-0.29	0.995	-1.23	0.0681	1.26	0.157
XF37_17110	acyl transferase	2	-2.1	0.00017	-0.03	0.998	-0.56	0.59	0.41	1
XF37_17115	GDP-mannose 4,6-dehydratase	2	-2.19	6.99e-06	0.18	0.998	-1.09	0.108	0.98	0.382
XF37_17120	GDP-fucose synthetase	2	-1.66	0.000488	0.25	0.998	-0.57	0.58	0.24	1
XF37_17125	GDP-mannose mannosyl hydrolase	2	-1.36	0.00261	0.11	0.998	-1.22	0.0642	0.86	0.438
XF37_17130	glycosyl transferase	2	-1.57	0.00122	0.06	0.998	-0.66	0.378	0.96	0.347
XF37_17135	mannose-1-phosphate guanyltransferase	1	-0.99	0.0289	0.36	0.981	-1.19	0.0697	1.62	0.049
XF37_17150	colanic acid exporter	1	-0.77	0.151	0.48	0.974	-1.56	0.00894	1.69	0.0176
XF37_17155	colanic acid biosynthesis protein	2	-1.66	0.00314	0.49	0.967	-1.06	0.123	1.41	0.103
XF37_17160	colanic acid biosynthesis glycosyltransferase WcaL	2	-1.43	0.00253	0.39	0.976	-0.43	0.606	0.47	0.921
XF37_17165	colanic acid biosynthesis protein	1	-1.31	0.00869	0.49	0.943	-1.41	0.0407	1.62	0.0699
XF37_17170	UDP-N-acetylglucosamine 4-epimerase	2	-1.64	1.12e-06	-0.07	0.998	-0.27	0.817	-0.1	1
XF37_17175	UTP--glucose-1-phosphate uridylyltransferase	2	-1	0.000186	0.17	0.989	-0.19	0.856	0.86	0.445
XF37_17180	glycosyl transferase	3	-3.08	6.39e-10	0.6	0.526	-1.67	0.00207	0.7	0.547
XF37_17185	polymerase	3	-2.94	9.86e-09	0.6	0.593	-1.67	0.0281	0.62	0.89
XF37_17190	glycosyl transferase	3	-2.73	8.64e-09	0.58	0.606	-1.82	0.00126	0.91	0.334
XF37_17195	flippase	2	-2.4	1.57e-07	0.73	0.354	-1.67	0.00237	0.48	0.861
XF37_17200	perosamine synthetase	3	-3.1	5.48e-10	1.28	0.0117	-1.64	0.0186	0.48	0.968
XF37_17205	glycosyl transferase	3	-3.08	1.73e-08	0.86	0.343	-1.85	0.0121	0.51	0.978
XF37_17210	GDP-mannose 4,6-dehydratase	2	-2.09	2.95e-08	0.77	0.122	-0.7	0.411	0.26	1
XF37_17215	fucose synthetase	2	-2.54	9.98e-11	0.83	0.0503	-0.78	0.173	0.54	0.734
XF37_17220	GDP-mannose mannosyl hydrolase	2	-2.59	1.16e-08	0.62	0.494	-1.05	0.0887	0.45	0.941
XF37_17225	mannose-1-phosphate guanylyltransferase	2	-1.48	6.96e-08	0.43	0.281	-0.16	0.901	0.2	1
XF37_17240	acetyltransferase	2	-1.49	0.000372	0.12	0.998	0.09	0.934	-0.02	1
XF37_17245	6-phosphogluconate dehydrogenase	2	-1.79	6.24e-08	0.13	0.998	-0.16	0.91	0.15	1
XF37_17250	UDP-glucose 6-dehydrogenase	2	-1.34	0.00105	-0.01	0.998	0.29	0.769	0.49	0.912
XF37_17255	chain length determinant protein WzzB	2	-1.6	1.69e-07	0.3	0.677	-0.96	0.25	0.35	1
XF37_17290	histidinol dehydrogenase	2	-0.17	0.522	-0.27	0.944	1.42	0.0301	0.1	1
XF37_17295	ATP phosphoribosyltransferase	2	0.17	0.691	-0.02	0.998	2.27	0.00167	0.1	1
XF37_17305	LysR family transcriptional regulator	5	2.27	2.22e-07	0.17	0.998	-0.6	0.607	0.06	1
XF37_17310	putrescine/spermidine ABC transporter	3	-4.17	2.28e-09	0.25	0.998	-0.39	0.666	0.33	1
XF37_17315	membrane protein	5	2.68	1.03e-07	-0.85	0.336	0.13	0.925	0.31	1
XF37_17320	membrane protein	5	2.71	1.15e-05	0.27	0.998	0.01	0.995	0.8	0.636
XF37_17350	NA	5	4.74	3.51e-09	-0.18	0.998	1.98	0.00396	0.44	0.955
XF37_17355	NA	4	2.97	0.000629	-2.51	0.0362	0.62	0.702	1.94	0.158
XF37_17360	NA	4	2.63	8.28e-06	-0.32	0.983	1.64	0.0173	0.32	1
XF37_17370	hypothetical protein	3	-3.15	0.00118	3.25	0.0362	1.01	0.214	-0.04	1
XF37_17405	hypothetical protein	2	-2.22	0.00262	2.69	0.0117	0.26	0.86	-1.5	0.207
XF37_17460	capsid assembly protein	4	1.37	0.0181	0.4	0.981	1.8	0.0384	-0.63	0.941
XF37_17465	head decoration protein	4	1.06	0.382	-1.99	0.546	1.58	0.0201	0.32	1
XF37_17470	head protein	2	1.03	0.249	-1.18	0.814	1.82	0.0374	-0.08	1
XF37_17485	hypothetical protein	3	-3.06	0.000282	1.46	0.51	-0.53	0.658	-1.11	0.576
XF37_17500	primosome assembly protein PriA	2	-0.3	0.501	-0.29	0.997	1.6	0.0348	0.53	0.956
XF37_17535	membrane protein	4	-1.57	0.00356	-1.71	0.0984	0.56	0.63	-0.26	1
XF37_17545	septal ring assembly protein ZapB	5	1.05	0.0265	0.39	0.962	-1.1	0.0772	0.58	0.754
XF37_17550	glycerol uptake facilitator GlpF	2	-2.09	1.48e-06	0.01	0.998	-0.02	0.982	-0.35	1
XF37_17555	glycerol kinase	2	-2.46	4.27e-10	0.39	0.666	-0.23	0.837	0.2	1
XF37_17560	fructose 1,6-bisphosphatase	2	-1.55	1.97e-05	-0.32	0.96	0.3	0.805	0.28	1
XF37_17595	CDP-diacylglycerol pyrophosphatase	2	-1.17	0.041	0.08	0.998	1.86	0.00369	0.62	0.762
XF37_17600	sulfate transporter subunit	5	3.89	5.85e-11	0.25	0.944	3.14	0.000227	0.62	0.921
XF37_17620	periplasmic repressor CpxP	1	1.82	1.17e-08	0.94	0.00543	-1.08	0.151	0.83	0.607
XF37_17660	transcriptional regulator	5	1.59	0.00493	0.04	0.998	-0.05	0.971	-0.03	1
XF37_17700	PTS fructose transporter subunit IIA	1	1.87	0.0485	-2.65	0.0944	-1.81	0.059	0.77	0.876
XF37_17720	hypothetical protein	2	-1.84	0.00409	-0.08	0.998	-0.93	0.249	0.5	0.916
XF37_17735	formate dehydrogenase	2	-1.45	2.39e-06	0.16	0.983	-0.67	0.54	-0.44	1
XF37_17785	hypothetical protein	2	-2.54	0.000191	1.13	0.586	-0.86	0.292	0.39	1
XF37_17820	gamma-hydroxybutyrate dehydrogenase	4	0.53	0.588	-1.58	0.524	1.05	0.246	-2.26	0.0242
XF37_17835	aldose epimerase	2	-0.83	0.139	0.66	0.855	0.91	0.29	-1.85	0.0311
XF37_17845	alpha-glucosidase	2	-2.09	0.0287	0.56	0.998	-0.39	0.782	0.15	1
XF37_17850	membrane protein	2	-2.4	0.00864	0.36	0.998	-0.39	0.805	-0.38	1
XF37_17880	GTP-binding protein TypA	2	-2.14	1.01e-08	0.2	0.976	0.6	0.557	0.22	1
XF37_17885	hypothetical protein	4	1.61	4.2e-07	-1.37	0.0053	7.64	8.28e-16	-2.48	4.9e-05
XF37_17890	glutamine synthetase	4	0.63	0.012	-1.15	0.0025	6.82	1.88e-14	-2.07	0.00114	glnALG operon
XF37_17895	nitrogen regulation protein NR(II)	4	1.21	2.67e-05	-1.44	0.0055	4.03	5.57e-09	-1.91	0.00799
XF37_17900	nitrogen regulation protein NR(I)	4	1.71	5.14e-06	-1.42	0.0268	4.04	1.76e-06	-1.89	0.0611
XF37_17905	hypothetical protein	2	0.21	0.621	-0.66	0.721	2.62	0.000692	-0.92	0.583
XF37_17935	acyltransferase	2	-2.43	1.64e-05	0.16	0.998	-0.33	0.817	0.93	0.636
XF37_17940	hypothetical protein	2	-1.74	0.000173	0.56	0.829	-0.92	0.242	-0.08	1
XF37_17945	protein disulfide isomerase	1	-1.07	4.83e-05	0.14	0.998	-0.86	0.165	0.24	1
XF37_17975	hypothetical protein	3	-3.48	5.81e-05	0.78	0.914	0.83	0.262	1.37	0.0767
XF37_17990	lysozyme	4	0.83	0.0169	-0.6	0.629	1.2	0.0436	-0.4	0.956
XF37_17995	antirepressor	5	1.08	0.000375	-0.36	0.83	0.76	0.312	-0.01	1
XF37_18000	membrane protein	5	1.19	0.00367	-0.33	0.975	0.77	0.248	-0.15	1
XF37_18030	membrane protein	2	-2.81	3.53e-06	0.4	0.982	-1.18	0.051	-0.31	1
XF37_18090	transcriptional regulator	2	-1.12	0.0201	-0.54	0.938	0.13	0.917	0.05	1
XF37_18095	hypothetical protein	2	-1.59	0.00338	0.73	0.779	-1.44	0.107	0.59	0.941
XF37_18115	aldo/keto reductase	1	-0.44	0.212	-0.5	0.822	-1.25	0.0355	0.44	0.947
XF37_18120	membrane protein	3	-2.64	0.00537	2.49	0.207	-1.55	0.209	2.14	0.106
XF37_18125	hypothetical protein	3	-2.52	0.00133	1.04	0.682	-0.38	0.851	1.28	0.606
XF37_18140	hypothetical protein	4	1.88	0.00018	-0.33	0.981	2.33	0.00216	-1.07	0.434
XF37_18145	amino acid dehydrogenase	4	1.8	4.78e-06	-0.55	0.619	1.92	0.00529	-1.47	0.121
XF37_18150	hypothetical protein	4	1.32	0.000852	-0.38	0.919	1.72	0.0196	-2.12	0.00818
XF37_18170	adhesin	4	-1.41	0.0276	-1.78	0.183	0.1	0.954	-1.32	0.295
XF37_18175	hypothetical protein	3	-3.2	0.00178	0.05	0.998	-1.43	0.0864	-0.02	1
XF37_18180	LuxR family transcriptional regulator	2	-1.67	0.0371	-0.42	0.998	0.69	0.639	0.76	0.912
XF37_18185	hypothetical protein	3	-2.61	0.00123	1.26	0.527	1.25	0.303	0.31	1
XF37_18195	hypothetical protein	4	2.75	0.00228	-2.16	0.126	0.64	0.351	0.56	0.653
XF37_18210	transcriptional regulator BetI	5	1.51	0.00845	-0.38	0.989	-0.76	0.409	0.81	0.688
XF37_18215	choline transporter	5	2.72	3.15e-05	-0.84	0.68	-0.18	0.892	0.32	1
XF37_18250	hypothetical protein	2	-1.86	0.00814	0.8	0.866	0.19	0.876	-0.62	0.768
XF37_18275	ASCH domain protein	4	1.07	0.0201	-1.67	0.1	0.41	0.754	-1.15	0.353
XF37_18280	LacI family transcriptional regulator	4	4.35	1.38e-14	-1.77	6.28e-05	4.2	5.27e-10	-2.29	0.000783
XF37_18285	sugar ABC transporter ATP-binding protein	4	2.62	3.07e-07	-1.63	0.0366	2.88	1.22e-05	-1.65	0.0427
XF37_18290	sugar ABC transporter permease	4	1.84	0.00101	-0.94	0.586	1.45	0.0321	-1.06	0.309
XF37_18295	sugar ABC transporter permease	5	1.3	0.000216	-0.62	0.549	0.42	0.647	-0.18	1
XF37_18315	membrane protein	5	1.89	8.43e-07	-0.4	0.77	-0.24	0.857	-0.95	0.566
XF37_18320	hypothetical protein	1	0.62	0.0507	0.73	0.305	-1.45	0.00648	-0.28	1
XF37_18325	propionate catabolism operon regulatory protein PrpR	5	1.19	0.00867	-1.1	0.368	-0.01	0.998	-0.37	1	Propionate utilzation (prp) operon
XF37_18330	2-methylisocitrate lyase	5	1.5	2.95e-07	0.42	0.366	-1.13	0.156	1.62	0.074
XF37_18335	methylcitrate synthase	1	2.26	6.18e-10	0.57	0.177	-1.57	0.00551	1.52	0.0282
XF37_18340	2-methylcitrate dehydratase	1	1.99	8.8e-09	0.59	0.155	-1.8	0.0138	1.16	0.296
XF37_18345	propionyl-CoA synthetase	5	1.72	3.85e-09	0.25	0.806	-1.03	0.22	1.13	0.354
XF37_18385	galactoside permease	4	1.06	0.0182	-1.26	0.248	-0.16	0.926	-1.07	0.587
XF37_18390	beta-D-galactosidase	4	1.12	0.00675	-0.65	0.721	1.79	0.0139	-1.22	0.277
XF37_18400	AraC family transcriptional regulator	5	1.72	0.00353	0.07	0.998	-0.39	0.646	0.42	0.978
XF37_18405	hypothetical protein	5	2.73	1.53e-05	0.05	0.998	-0.4	0.656	0.09	1
XF37_18410	transcriptional regulator	5	1.36	0.000249	-0.05	0.998	-0.2	0.827	-0.17	1
XF37_18415	3-(3-hydroxyphenyl)propionate hydroxylase	2	-0.13	0.833	1.29	0.288	1.69	0.00867	-1.03	0.211
XF37_18425	2-hydroxy-6-oxo-6-phenylhexa-2,4-dienoate hydrolase	2	-0.28	0.615	-0.65	0.823	1.6	0.0495	-1.3	0.199
XF37_18450	hypothetical protein	2	-1.34	0.0476	0.45	0.991	-0.51	0.614	-0.17	1
XF37_18455	S-formylglutathione hydrolase	5	1.4	0.000973	-0.16	0.998	-0.14	0.921	0.48	1
XF37_18460	S-(hydroxymethyl)glutathione dehydrogenase	5	1.13	6.51e-05	-0.01	0.998	0.18	0.876	0.11	1
XF37_18490	histidine kinase	5	1.13	0.0017	-0.08	0.998	-0.4	0.677	0.18	1
XF37_18495	transcriptional regulator	5	1.37	0.0018	-0.49	0.882	-0.19	0.858	-0.48	0.943
XF37_18500	taurine ABC transporter substrate-binding protein	6	4.88	2.72e-07	1.71	0.0362	7.29	1.31e-11	0.5	0.943	Taurine utilization (tau) operon
XF37_18505	taurine transporter ATP-binding subunit	6	5.05	1.43e-07	1.46	0.0944	7.08	5.01e-11	0.74	0.707
XF37_18510	taurine transporter subunit	6	4.8	9.63e-08	1.51	0.0613	7.96	2.45e-12	0.88	0.529
XF37_18515	taurine dioxygenase	6	3.7	7.6e-05	1.77	0.104	7.06	1.13e-12	0.55	0.819
XF37_18555	membrane protein	5	3.18	6.26e-09	-0.15	0.998	-0.67	0.45	0.78	0.692
XF37_18565	membrane protein	5	1.66	0.00409	-0.48	0.962	-0.04	0.973	-0.21	1
XF37_18570	D-alanine--D-alanine ligase	2	-1.34	1.17e-05	0.13	0.998	-0.04	0.969	0.28	1
XF37_18610	hypothetical protein	5	1.79	3.2e-05	0.86	0.233	-0.79	0.305	-0.05	1
XF37_18615	cysteine methyltransferase	5	1.26	0.00657	-0.09	0.998	-0.24	0.812	0.47	0.946
XF37_18620	hypothetical protein	5	3.94	3.65e-16	-0.19	0.809	-0.74	0.384	0.62	0.81
XF37_18630	ammonium transporter	6	5.04	1.95e-11	-1.62	0.00969	8.39	2.92e-14	-2.48	0.0012
XF37_18635	nitrogen regulatory protein P-II 1	6	5.68	1.02e-10	-1.31	0.0773	11.32	6.87e-16	-2.12	0.00535
XF37_18640	multidrug ABC transporter ATP-binding protein	2	-1.16	0.00163	0.43	0.859	0.12	0.926	-0.29	1
XF37_18645	multidrug ABC transporter ATP-binding protein	2	-1.27	0.014	0.06	0.998	0.39	0.695	-0.19	1
XF37_18670	thioesterase	5	1.35	0.00166	0.15	0.998	-1.24	0.0696	0.31	1
XF37_18680	molecular chaperone	2	-2.2	1.51e-08	0.03	0.998	-0.1	0.924	0.02	1
XF37_18705	trigger factor	2	-1.83	4.11e-09	0.09	0.998	-0.13	0.926	0.22	1
XF37_18715	transcriptional regulator BolA	5	3.14	5.3e-14	0.57	0.0597	-1.34	0.059	-0.01	1
XF37_18720	hypothetical protein	2	-1.48	0.000747	-0.33	0.983	0.35	0.672	0.14	1
XF37_18725	muropeptide transporter	2	-2.07	0.000173	0.48	0.958	0.56	0.483	-0.07	1
XF37_18730	cytochrome o ubiquinol oxidase subunit II	2	-2.16	8.45e-12	-0.06	0.998	-0.55	0.537	-0.17	1
XF37_18735	cytochrome o ubiquinol oxidase subunit I	2	-1.9	4.39e-07	-0.13	0.998	-1.23	0.141	-0.03	1
XF37_18740	cytochrome o ubiquinol oxidase subunit III	1	-1.42	2.24e-06	-0.05	0.998	-1.96	0.00109	-0.16	1
XF37_18745	cytochrome o ubiquinol oxidase subunit IV	1	-1.01	0.0012	-0.11	0.998	-1.57	0.00733	-0.33	1
XF37_18750	protoheme IX farnesyltransferase	1	-0.46	0.0434	0.03	0.998	-1.09	0.0307	-0.69	0.512
XF37_18755	membrane protein	2	-1.2	0.0054	-0.07	0.998	-0.28	0.779	-0.2	1
XF37_18760	nucleotide-binding protein	2	-1.82	2.22e-07	0.05	0.998	-0.29	0.797	0.23	1
XF37_18775	tRNA s(4)U8 sulfurtransferase	2	-1.9	0.000122	0.17	0.998	0.95	0.264	0.77	0.715
XF37_18780	exodeoxyribonuclease VII small subunit	2	-0.22	0.68	-0.1	0.998	1.34	0.0414	-0.18	1
XF37_18795	oxidoreductase	5	1.01	0.000969	0.11	0.998	-0.34	0.695	0.13	1
XF37_18800	pentapeptide repeats family protein	3	-3.1	2.27e-08	0.32	0.986	-2	0.00911	-0.96	0.583
XF37_18810	thiamine monophosphate kinase	2	-1.74	0.000206	-0.03	0.998	-0.05	0.97	-0.43	1
XF37_18835	hypothetical protein	5	1.38	0.00469	0.16	0.998	-1.11	0.0878	0.73	0.631
XF37_18840	nucleoside-specific channel-forming protein Tsx	2	-1.51	1.29e-05	-0.44	0.768	-0.31	0.711	-0.67	0.662
XF37_18845	hypothetical protein	4	3.26	3.23e-06	-0.37	0.976	2.48	0.00575	-0.2	1
XF37_18860	antitoxin	5	1.28	0.000143	0.11	0.998	-0.92	0.111	0.01	1
XF37_18865	preprotein translocase subunit SecF	2	-1.34	0.000142	-0.15	0.998	-0.73	0.316	-0.14	1
XF37_18870	preprotein translocase subunit SecD	2	-1.54	8.87e-07	-0.05	0.998	0.11	0.915	-0.03	1
XF37_18880	queuine tRNA-ribosyltransferase	2	-1.3	1.91e-05	-0.11	0.998	-0.62	0.506	0.06	1
XF37_18885	S-adenosylmethionine:tRNA ribosyltransferase-isomerase	2	-1.88	6.07e-06	-0.1	0.998	1.15	0.237	0.29	1
XF37_18900	maltodextrin glucosidase	2	-1.59	0.000919	-0.63	0.862	-0.54	0.548	1.2	0.242
XF37_18905	proline-specific permease	2	-1.28	0.00257	0.1	0.998	0.25	0.809	0.54	0.883
XF37_18915	phosphate regulon sensor protein	2	-0.53	0.088	0.29	0.96	2.47	0.000244	-0.39	1
XF37_18920	transcriptional regulator PhoB	2	-0.18	0.633	0.29	0.981	3.1	7.64e-06	-0.29	1
XF37_18925	exonuclease SbcD	2	-1.14	0.0156	-0.19	0.998	1.13	0.217	-0.38	1
XF37_18930	exonuclease SbcC	2	-1.67	1.28e-05	-0.21	0.998	-0.35	0.721	0.11	1
XF37_18945	recombination associated protein	2	-1.38	0.000217	-0.18	0.998	0.3	0.708	0.2	1
XF37_18950	hypothetical protein	2	-2.01	0.0479	-0.47	0.998	0.69	0.554	-0.53	1
XF37_18960	hypothetical protein	5	1.42	8.6e-05	-0.05	0.998	0.02	0.991	0.44	1
XF37_18975	hypothetical protein	5	1.42	5.95e-05	1.08	0.0335	-0.51	0.544	0.99	0.333
XF37_18995	diguanylate cyclase	5	1.47	0.00604	0.73	0.66	0.21	0.851	-0.03	1
XF37_19000	hypothetical protein	5	2.94	1.64e-11	0.36	0.588	-1.2	0.117	-0.33	1
XF37_19005	alkaline phosphatase	2	-0.15	0.647	-0.32	0.944	1.58	0.0223	-0.04	1
XF37_19020	histone-lysine N-methyltransferase	3	-2.55	0.00483	-1.28	0.717	-1.84	0.059	0.13	1
XF37_19050	heat shock protein HspQ	5	2.55	2.62e-08	0.47	0.629	-1.31	0.059	0.37	1
XF37_19055	hypothetical protein	5	1.2	0.00143	0.15	0.998	-0.39	0.71	0	1
XF37_19060	hypothetical protein	5	1.42	0.0276	0.41	0.983	-1.42	0.094	0.02	1
XF37_19065	hypothetical protein	1	0.72	0.134	-0.31	0.991	-1.64	0.0104	-0.73	0.686
XF37_19080	hypothetical protein	2	-1.08	0.0657	0.19	0.998	1.48	0.0351	-0.26	1
XF37_19085	membrane protein	2	-1.57	0.000885	0.3	0.995	0.24	0.814	-0.25	1
XF37_19095	SOS cell division inhibitor	5	2.31	1.11e-08	-0.42	0.677	-0.59	0.529	0.51	0.956
XF37_19100	hypothetical protein	5	1.19	0.00516	-0.83	0.503	-0.57	0.533	-0.77	0.653
XF37_19105	membrane protein	1	-0.45	0.011	-0.43	0.13	-1.17	0.0182	-0.57	0.572
XF37_19115	Lon protease	2	-1.14	3.07e-05	0.1	0.998	-0.47	0.651	0.01	1
XF37_19120	3-hydroxydecanoyl-ACP dehydratase	2	-1.14	0.00101	0.18	0.998	0.42	0.554	-0.05	1
XF37_19125	ribosome modulation factor	5	2.03	4.85e-09	-0.03	0.998	-1.03	0.0919	0.31	1
XF37_19135	paraquat-inducible protein B	2	-1.28	0.000282	0.17	0.998	-0.55	0.472	0.04	1
XF37_19145	ABC transporter ATPase	2	-1.33	0.00338	0.42	0.944	-0.51	0.632	-0.29	1
XF37_19150	23S rRNA methyltransferase	2	-2.1	4.81e-08	0.04	0.998	0.44	0.571	-0.31	1
XF37_19160	cell division protein ZapC	5	1.07	0.000753	-1	0.149	0.85	0.239	-0.18	1
XF37_19165	dihydroorotate dehydrogenase	2	-3.01	1.02e-05	0.42	0.989	0.53	0.516	0.71	0.623
XF37_19195	fimbrial protein	3	-2.46	0.0128	-0.49	0.998	0.21	0.861	-2.76	0.005
XF37_19205	NAD(P)H-dependent FMN reductase	6	5.33	1.66e-07	2.89	0.00023	10.37	8.28e-16	1.13	0.229	Alkanesulfonates utilization (ssu) operon
XF37_19210	alkanesulfonate transporter substrate-binding subunit	6	4.28	9.59e-06	2.71	0.00193	8.39	2.3e-15	1.34	0.0375
XF37_19215	alkanesulfonate monooxygenase	6	4.48	4.99e-07	2.42	0.00125	8.52	1.55e-11	1.5	0.167
XF37_19220	alkanesulfonate transporter permease subunit	6	3.07	0.0001	2.47	0.00394	7.55	4.01e-11	1.57	0.105
XF37_19225	aliphatic sulfonates transport ATP-binding subunit	6	2.81	0.000493	2.8	0.00201	6.96	1e-11	1.51	0.0639
XF37_19250	hypothetical protein	4	1.47	0.0476	-2.68	0.0176	0.88	0.255	-2.15	0.0206
XF37_19255	aromatic amino acid aminotransferase	2	-1.42	6.24e-08	0.07	0.998	0.07	0.961	-0.25	1
XF37_19265	hypothetical protein	4	0.96	0.000112	-0.25	0.864	1.46	0.0158	0.31	1
XF37_19270	murein L,D-transpeptidase	5	1.22	6.03e-06	0.25	0.858	-0.49	0.696	0.15	1
XF37_19305	3-deoxy-manno-octulosonate cytidylyltransferase	2	-1.35	0.000797	0.34	0.972	-0.06	0.965	0.66	0.776
XF37_19325	lipid transporter ATP-binding/permease	2	-1.18	0.000205	0.19	0.998	0.32	0.727	0.37	1
XF37_19340	30S ribosomal protein S1	2	-1.9	1.81e-08	0.14	0.989	0.09	0.957	0.28	1
XF37_19345	cytidylate kinase	2	-1.13	3e-06	0.27	0.745	-0.08	0.954	0.08	1
XF37_19355	3-phosphoshikimate 1-carboxyvinyltransferase	2	-1.93	0.000124	0.42	0.964	0.32	0.769	-0.31	1
XF37_19370	ribosomal protein S12 methylthiotransferase accessory factor YcaO	2	-2.09	2.19e-06	-0.11	0.998	1.13	0.169	0.08	1
XF37_19375	formate transporter	2	-2.1	2.24e-10	0.3	0.717	-0.61	0.523	-0.15	1
XF37_19380	pyruvate formate-lyase	2	-2.47	5.87e-12	0.41	0.253	-0.27	0.795	-0.11	1
XF37_19385	pyruvate formate lyase-activating enzyme 1	2	-1.71	5.34e-07	0.44	0.621	-0.91	0.238	-0.03	1
XF37_19390	transporter	2	-1.64	0.000823	-0.4	0.981	-0.44	0.553	-0.36	1
XF37_19395	MFS transporter	2	-2.93	2.29e-08	-0.01	0.998	0.27	0.783	-0.4	0.997
XF37_19400	hypothetical protein	1	-0.64	0.00316	0.01	0.998	-1.43	0.0469	-0.33	1
XF37_19405	dimethyl sulfoxide reductase	1	-1.68	0.00925	-0.82	0.867	-0.02	0.987	-0.48	0.899
XF37_19410	dimethyl sulfoxide reductase	1	-2.37	0.000284	-0.99	0.755	-0.46	0.738	-0.31	1
XF37_19415	dimethyl sulfoxide reductase	2	-3.1	3.86e-07	-0.19	0.998	-0.28	0.785	0.05	1
XF37_19440	leucine-responsive transcriptional regulator	4	1.76	3.14e-06	-0.29	0.943	1.29	0.0436	-0.56	0.856
XF37_19445	thioredoxin reductase	2	-1.43	6.33e-07	-0.08	0.998	0.15	0.905	0.18	1
XF37_19450	amino acid ABC transporter permease	2	-2.1	2.88e-05	0.23	0.998	-0.6	0.548	-0.07	1
XF37_19455	amino acid ABC transporter permease	2	-1.74	0.000331	0.04	0.998	-0.75	0.282	-0.2	1
XF37_19465	translation initiation factor IF-1	2	-2.77	2.83e-06	0.84	0.632	-0.4	0.797	0.56	1
XF37_19475	Clp protease ClpX	5	1.67	9.95e-10	-0.18	0.829	-0.09	0.948	0.34	1
XF37_19480	Clp protease ClpS	5	2.28	2.16e-09	-0.26	0.905	-0.38	0.714	1.03	0.384
XF37_19485	stationary phase/starvation inducible regulatory protein CspD	5	3.28	2.39e-10	-0.31	0.892	-0.5	0.556	-0.26	1
XF37_19500	hypothetical protein	2	-2.11	6.51e-05	-0.14	0.998	-0.77	0.231	0.06	1
XF37_19505	hypothetical protein	5	1.1	0.000199	-0.11	0.998	-0.87	0.189	-0.3	1
XF37_19520	membrane protein	2	-2.12	0.000242	-0.05	0.998	-0.01	0.998	0.3	1
XF37_19525	hydroxylamine reductase	2	-1.48	0.0345	0.08	0.998	-0.57	0.732	0.92	0.848
XF37_19535	pyruvate dehydrogenase	5	1.28	3.84e-06	0.62	0.127	-0.48	0.653	0.3	1
XF37_19550	hypothetical protein	1	-1.96	0.000287	-0.88	0.722	0.57	0.517	0.07	1
XF37_19560	hypothetical protein	5	1.29	0.000331	-0.32	0.944	-0.25	0.834	0.05	1
XF37_19570	hypothetical protein	4	-1.21	0.0821	-1.71	0.251	0.7	0.352	-2.69	0.0012
XF37_19585	arginine ABC transporter ATP-binding protein	2	-1.89	1.31e-09	-0.33	0.653	-0.04	0.982	0.02	1
XF37_19590	arginine ABC transporter substrate-binding protein	2	-1.61	2.37e-07	-0.03	0.998	-0.29	0.778	0.08	1
XF37_19595	arginine transporter permease subunit ArtQ	2	-1.79	0.000592	-0.28	0.998	0	0.998	0.05	1
XF37_19605	arginine ABC transporter substrate-binding protein	4	1.52	5.14e-08	-1.74	1.96e-05	2.27	0.00549	-0.18	1
XF37_19620	PTS ascorbate transporter subunit IIC	4	-1.01	0.169	-1.05	0.69	1.43	0.0585	-2.68	0.00339
XF37_19625	23S rRNA methyltransferase	2	-1.36	0.0275	0.14	0.998	1.77	0.00706	-0.17	1
XF37_19630	membrane protein	4	0.22	0.799	-2.29	0.239	1.82	0.0104	-0.87	0.552
XF37_19635	spermidine/putrescine ABC transporter permease	4	1.44	0.00209	-0.52	0.864	1.15	0.0315	-1.19	0.106
XF37_19655	putrescine/spermidine ABC transporter substrate-binding protein	4	1.5	0.000297	-0.46	0.852	0.52	0.539	-0.02	1
XF37_19660	hypothetical protein	2	-1.16	0.00103	0.51	0.717	-0.49	0.637	0.53	0.956
XF37_19680	glutaredoxin	7	2.11	6.97e-05	0.9	0.343	1.97	0.000499	2.63	7.93e-05
XF37_19690	transporter	2	-1.25	0.00458	0.18	0.998	-0.04	0.977	-0.08	1
XF37_19695	DeoR faimly transcriptional regulator	5	1.28	0.00177	0.02	0.998	-1.07	0.149	0.86	0.557
XF37_19715	multidrug transporter	2	-2.14	3.11e-08	0.16	0.998	-0.22	0.785	-0.13	1
XF37_19735	glutathione S-transferase	5	1.24	0.00412	-0.65	0.722	0	0.999	0.27	1
XF37_19745	biofilm formation regulatory protein BssR	1	-1.05	0.0134	1.08	0.236	-2.06	0.00155	0.32	1
XF37_19750	ribosomal protein S12 methylthiotransferase	2	-2.12	3.28e-06	-0.2	0.998	1.75	0.0122	0.7	0.719
XF37_19760	transcriptional regulator, XRE family protein	5	1.16	0.0222	0.1	0.998	-0.78	0.408	0.6	0.92
XF37_19770	c-di-GMP phosphodiesterase	3	-4.21	5.52e-06	-0.8	0.931	0.29	0.808	-0.28	1
XF37_19790	glutathione ABC transporter ATP-binding protein	5	1.03	0.000104	-0.44	0.586	0.95	0.224	0.11	1
XF37_19795	hypothetical protein	4	2.23	2.44e-06	-0.33	0.96	0.94	0.0779	-0.04	1
XF37_19800	L-asparaginase	4	2.15	2.77e-10	-0.3	0.717	0.62	0.384	0.08	1
XF37_19820	pyruvate formate lyase-activating protein	4	-1.21	0.104	-0.99	0.745	-0.98	0.106	-2.18	0.00581
XF37_19830	sugar phosphatase	2	-1.29	0.0069	0.16	0.998	1.03	0.0688	0.38	0.968
XF37_19845	L,D-transpeptidase	2	-1.29	1.7e-06	-0.06	0.998	-0.1	0.934	0.11	1
XF37_19865	phosphoethanolamine transferase	3	-3.86	2.79e-10	0.51	0.84	1.06	0.121	0.2	1
XF37_19870	membrane protein	1	0.02	0.942	0.1	0.997	-1.5	0.0271	0.74	0.636
XF37_19880	DNA starvation/stationary phase protection protein Dps	5	1.49	9.97e-09	0.31	0.428	-1.61	0.00631	0.38	0.968
XF37_19890	glutamine ABC transporter substrate-bindnig protein	4	1.06	3.14e-06	-0.61	0.0361	2.19	0.00635	-1.7	0.106	Glutamine ABC transporter (gln) operon
XF37_19895	glutamine ABC transporter permease	2	-0.28	0.478	-0.47	0.877	2.23	0.00346	-1.52	0.171
XF37_19900	glutamine ABC transporter ATP-binding protein	2	-0.24	0.519	-0.37	0.944	1.94	0.0108	-1.37	0.245
XF37_19910	mechanosensitive channel protein	5	2.37	4.82e-05	0.01	0.998	-0.64	0.352	0.54	0.823
XF37_19915	23S rRNA methyltransferase	2	-1.66	0.00355	-0.16	0.998	0.37	0.702	1.1	0.269
XF37_19920	hypothetical protein	1	1.86	3.1e-05	3.97	1.89e-09	-0.61	0.55	0.96	0.523
XF37_19925	catecholate siderophore receptor Fiu	3	-2.88	7.76e-08	1.4	0.0736	-0.89	0.385	0.5	1
XF37_19935	hypothetical protein	1	0.56	0.0658	0.46	0.693	-1.48	0.0241	-0.31	1
XF37_19940	hypothetical protein	1	3.52	5.61e-07	2.12	0.00174	-0.34	0.781	2.46	0.00803
XF37_19945	dehydrogenase	5	1.01	0.000169	-0.31	0.838	-0.39	0.682	-0.09	1
XF37_19950	glycosyl transferase	5	1.01	0.00142	-0.08	0.998	-0.1	0.939	-0.13	1
XF37_19960	type III effector	2	-3.29	3.71e-06	1.01	0.631	0.15	0.905	-0.12	1
XF37_19970	ATP-dependent RNA helicase RhlE	2	-1.93	3.62e-08	0.31	0.862	1.44	0.0196	0.57	0.819
XF37_19975	transcriptional regulator	5	1.37	0.00341	-0.16	0.998	0.64	0.388	0.52	0.884
XF37_20000	membrane protein	5	2.62	1.99e-08	0	1	0.63	0.344	-0.21	1
XF37_20005	hypothetical protein	5	1.3	0.000387	0.05	0.998	-0.1	0.942	0.45	0.991
XF37_20010	cardiolipin synthase 2	5	1.44	2.36e-06	0.17	0.989	-0.05	0.973	0.59	0.931
XF37_20015	membrane protein	5	1.89	0.000109	0.01	0.998	0.59	0.404	0.56	0.791
XF37_20025	membrane protein	5	1.3	0.00391	0.35	0.974	-1.21	0.106	0.18	1
XF37_20070	dethiobiotin synthetase	5	3.54	2.9e-08	-0.13	0.998	2.54	0.000703	1.32	0.194
XF37_20075	biotin biosynthesis protein BioC	5	4.31	7.17e-10	-0.15	0.998	3.93	3.36e-08	0.99	0.255
XF37_20080	8-amino-7-oxononanoate synthase	5	5.17	1.34e-11	0.09	0.998	4.67	6.68e-08	1.58	0.0849
XF37_20085	biotin synthase	5	5.36	2.92e-11	-0.3	0.942	3.99	1.88e-05	1.62	0.157
XF37_20090	adenosylmethionine-8-amino-7-oxononanoate aminotransferase	5	3.97	1.02e-07	0.03	0.998	2.24	0.00187	1.47	0.113
XF37_20110	T3SS effector protein NleH	2	-2.94	8.4e-05	0.45	0.989	-0.84	0.251	0.19	1
XF37_20115	peptidase M85	2	-1.45	0.00569	-0.19	0.998	-0.19	0.864	-0.24	1
XF37_20120	non-LEE encoded effector protein NleB	3	-3.39	1.84e-09	0.78	0.518	-0.31	0.883	-2	0.215
XF37_20150	stress-induced bacterial acidophilic repeat motif	1	2.01	3.64e-06	1.67	0.00119	-2.25	0.000813	1.67	0.0427
XF37_20155	hypothetical protein	1	1.15	0.00718	1.38	0.0474	0.24	0.867	1.6	0.153
XF37_20160	hypothetical protein	1	1.64	0.000391	1.31	0.0573	0.84	0.396	1.82	0.0699
XF37_20165	Mn-containing catalase	1	1.29	0.00546	0.98	0.302	-1.29	0.0374	1.46	0.0585
XF37_20170	tail assembly protein	1	-1.25	0.148	1.13	0.79	-1.02	0.439	2.75	0.0233
XF37_20180	enterobacterial Ail/Lom family protein	5	1.49	0.00386	-0.7	0.748	-0.07	0.952	-0.2	1
XF37_20185	host specificity protein J	5	1.06	0.0273	-0.46	0.942	0.43	0.814	-0.14	1
XF37_20215	vitamin B12/cobalamin outer membrane transporter	2	-1.46	2.79e-07	-0.04	0.998	-0.32	0.74	-0.44	0.982
XF37_20220	tRNA (uracil-5-)-methyltransferase	1	-1.87	0.000209	-0.89	0.654	-0.1	0.937	0.44	0.968
XF37_20240	peptidase M20	3	-3.4	0.000659	1.65	0.507	-0.53	0.536	0.46	0.899
XF37_20255	argininosuccinate lyase	2	0.91	1.57e-05	-1.1	0.00186	2.38	0.000102	-0.5	0.892
XF37_20260	acetylglutamate kinase	4	0.86	0.00075	-1.25	0.0108	2.97	0.00103	-0.81	0.848
XF37_20265	N-acetyl-gamma-glutamyl-phosphate reductase	4	0.62	0.00387	-1.45	0.000789	3.37	3.76e-05	-0.63	0.909
XF37_20270	acetylornithine deacetylase	2	0.64	0.0359	-0.76	0.351	1.59	0.0293	-0.76	0.725
XF37_20280	hypothetical protein	2	-2.28	1.9e-08	0.26	0.959	0.48	0.632	0.35	1
XF37_20320	fructose-6-phosphate aldolase	1	-1.47	0.0151	0.58	0.944	-0.91	0.306	-0.41	1
XF37_20345	peroxidase	2	-0.52	0.0049	0.09	0.998	1.19	0.0469	1.37	0.0526
XF37_20350	5,10-methylenetetrahydrofolate reductase	6	5.91	1.81e-11	-0.85	0.236	5.84	3.76e-09	0.17	1
XF37_20360	aspartate kinase	4	1.38	2.96e-06	-0.74	0.161	2.17	0.00276	1.09	0.349
XF37_20365	cystathionine gamma-synthase	4	3.2	3.66e-10	-1.15	0.0498	3.07	7.76e-05	1.27	0.237
XF37_20375	hypothetical protein	2	0.42	0.381	-0.27	0.998	1.74	0.00466	0.72	0.564
XF37_20385	transposase	2	-0.19	0.672	-0.93	0.474	1.98	0.00472	-0.46	0.968
XF37_20390	transposase	2	-0.63	0.544	0.23	0.998	3.01	3.85e-05	-0.54	0.856
XF37_20460	antitermination protein	4	3.48	0.000618	0.11	0.998	4.37	0.00108	0.28	1
XF37_20530	spermidine/putrescine ABC transporter permease	2	-1.6	9.89e-08	0.11	0.998	-0.09	0.95	0.24	1
XF37_20555	lipoprotein ABC transporter ATP-binding protein	2	-1.76	0.000721	0.18	0.998	0.05	0.969	0.45	0.984
XF37_20560	outer membrane-specific lipoprotein transporter subunit LolC	2	-1.37	2.98e-05	-0.19	0.998	0.72	0.3	0.25	1
XF37_20565	membrane protein	5	1.3	0.0289	-0.39	0.989	0.09	0.964	-0.59	0.991
XF37_20580	multiple stress resistance protein BhsA	1	0.4	0.49	2.14	0.0158	-3.31	4.91e-06	4.05	3.41e-06
XF37_20590	hypothetical protein	5	2.11	3.22e-08	-0.21	0.968	-0.02	0.982	1.2	0.11
XF37_20595	NADH dehydrogenase	1	-1.14	0.0285	-0.75	0.843	0	0.999	0.43	1
XF37_20630	ferric-rhodotorulic acid transporter	1	-0.3	0.507	0.25	0.998	-1.81	0.0259	0.63	0.931
XF37_20640	DNAse	5	1.38	1.82e-06	0.46	0.438	-0.37	0.741	-0.41	1
XF37_20665	3-oxoacyl-ACP synthase	2	-1.73	5.44e-07	0.15	0.998	-0.49	0.6	-0.17	1
XF37_20680	malonyl CoA-ACP transacylase	2	-1.29	1.12e-06	-0.08	0.998	-0.38	0.644	-0.05	1
XF37_20685	3-oxoacyl-ACP synthase	2	-1.72	6.87e-09	-0.29	0.819	-0.27	0.78	0.24	1
XF37_20690	phosphate acyltransferase	2	-1.67	1.25e-08	-0.16	0.981	-0.41	0.6	-0.06	1
XF37_20700	hypothetical protein	2	-1.13	1.34e-07	0.04	0.998	0.02	0.992	-0.01	1
XF37_20710	23S rRNA pseudouridylate synthase	2	-1.45	0.00502	-0.08	0.998	0.08	0.945	0.58	0.765
XF37_20720	ribonuclease E	2	-1.31	8.85e-07	0.08	0.998	-0.27	0.84	-0.13	1
XF37_20730	flagellar hook protein FlgK	2	-1.51	0.00222	-0.4	0.981	-0.57	0.562	-0.05	1	Flagella formation (flg) operon
XF37_20735	flagellar rod assembly protein FlgJ	2	-1.78	0.0108	0.46	0.989	-0.11	0.936	0.48	0.966
XF37_20745	flagellar basal body L-ring protein	3	-2.06	0.0037	1.81	0.222	-1.1	0.192	1.71	0.0515
XF37_20750	flagellar basal body rod protein FlgG	2	-2.42	1.72e-05	0.05	0.998	-0.27	0.855	-1.76	0.106
XF37_20755	flagellar basal body rod protein FlgF	2	-1.72	0.000167	-0.25	0.998	-0.13	0.954	-1.1	0.733
XF37_20760	flagellar hook protein FlgE	2	-2.32	6.66e-05	-0.47	0.981	0.1	0.932	-1.59	0.0382
XF37_20765	flagellar basal body rod modification protein	2	-1.72	0.00907	-0.55	0.981	-1.04	0.405	1.2	0.511
XF37_20770	flagellar basal body rod protein FlgC	2	-1.81	0.000486	0.16	0.998	-0.84	0.359	1.03	0.37
XF37_20775	hypothetical protein	3	-2.13	0.000295	0.57	0.931	-0.08	0.962	-1.91	0.176
XF37_20815	multidrug resistance protein MdtH	2	-2.18	3.81e-05	-0.26	0.998	0.11	0.92	-0.25	1
XF37_20820	glutaredoxin	1	0.47	0.0152	0.24	0.822	-1.92	0.00159	0.32	1
XF37_20830	dihydroorotase	2	-1.51	0.000505	-0.13	0.998	1.26	0.101	-0.08	1
XF37_20835	hypothetical protein	5	1.51	0.000107	-0.21	0.995	0.16	0.91	-0.49	0.986
XF37_20840	biofilm formation regulatory protein BssS	5	3.27	2.83e-15	0.24	0.602	-1.4	0.108	0.51	0.992
XF37_20850	hypothetical protein	2	-1.69	0.026	1.31	0.487	1.49	0.127	-0.6	0.984
XF37_20865	sulfurtransferase	2	-2.24	4.14e-05	0.16	0.998	0.49	0.595	0.07	1
XF37_20885	secY/secA suppressor protein	1	0.18	0.497	-0.33	0.84	-1.28	0.0201	-0.56	0.72
XF37_20900	glucan biosynthesis protein G	2	-1.51	2.08e-09	0.14	0.96	0.07	0.95	0.02	1
XF37_20905	hypothetical protein	2	0.66	0.165	-0.72	0.691	1.73	0.0495	-1.02	0.509
XF37_20910	glucans biosynthesis protein	2	-2.87	4.23e-08	0.34	0.975	-0.3	0.736	0.69	0.636
XF37_20920	RNase III inhibitor	5	1.54	3.81e-07	0.05	0.998	-0.18	0.887	-0.07	1
XF37_20925	hypothetical protein	5	1.17	0.0382	0.07	0.998	-1.47	0.136	0.22	1
XF37_20930	curli assembly protein CsgC	3	-3.49	0.000765	2.03	0.389	-0.78	0.645	1.01	0.81
XF37_20950	transcriptional regulator	2	-1.22	0.0112	0.41	0.976	-1.01	0.11	0.48	0.915
XF37_20955	curli assembly protein CsgE	3	-2.82	3.94e-05	0.99	0.654	-1.6	0.00893	-0.4	1
XF37_20960	curli assembly protein CsgF	3	-2.21	1.01e-06	0.57	0.717	-1.49	0.0294	-0.62	0.859
XF37_20975	molecular chaperone	2	-1.39	0.00222	0.26	0.998	-0.02	0.987	0.18	1
XF37_21010	toxin	2	-2.24	0.00286	-0.43	0.995	1.71	0.00499	-0.35	0.991
XF37_21015	antitoxin	2	-2.21	0.00922	2.17	0.229	0.78	0.598	-1.18	0.587
XF37_21020	hypothetical protein	4	-0.54	0.441	-1.91	0.155	2.94	3.87e-05	-3.56	0.000198
XF37_21035	phage antirestriction protein	4	1.54	0.00514	-0.33	0.991	1.25	0.0901	0.17	1
XF37_21065	colanic acid biosynthesis acetyltransferase	1	-0.74	0.203	-0.46	0.983	-1.91	0.0061	0.53	0.884
XF37_21085	tail protein	4	0.05	0.929	-1.44	0.207	1.3	0.0356	-0.45	0.917
XF37_21095	tail protein	2	-2.31	0.00163	0.6	0.976	0.85	0.261	0.02	1
XF37_21105	hypothetical protein	2	-1.65	0.000307	0.88	0.447	-0.29	0.793	0.04	1
XF37_21210	DNA packaging protein	1	-2.33	0.0206	-1.5	0.711	0.01	0.996	0.18	1
XF37_21220	transcriptional regulator	1	-1.24	1.48e-05	0.48	0.44	-1.24	0.0195	-0.21	1
XF37_21230	multidrug transporter	2	-1.53	8.42e-08	0.04	0.998	-0.81	0.132	-0.33	0.982
XF37_21235	multidrug transporter	2	-1.94	8.15e-06	0.26	0.984	-0.78	0.362	0.02	1
XF37_21240	hypothetical protein	1	0.39	0.519	0.91	0.628	-1.92	0.00168	-0.62	0.763
XF37_21245	LuxR family transcriptional regulator	5	1.04	1.31e-06	0.43	0.13	-1.2	0.16	-0.27	1
XF37_21260	acid-resistance protein	1	-1.41	2.81e-06	0.68	0.109	-1.84	0.00261	-0.37	1
XF37_21265	hypothetical protein	1	-2.4	1.2e-08	-0.06	0.998	-0.83	0.193	-0.1	1
XF37_21270	hemin importer ATP-binding subunit	2	-2	0.00449	0.01	0.999	-0.01	0.993	-0.57	0.751
XF37_21285	ShuX	2	-1.62	0.00798	0.29	0.998	-0.2	0.889	-0.7	0.782
XF37_21300	hypothetical protein	3	-2.46	0.00453	2.11	0.244	-2.81	0.000274	1.12	0.449
XF37_21305	ligand-gated channel protein	2	-1.98	0.000707	0.25	0.998	-0.94	0.128	0.26	1
XF37_21310	hemin transporter	3	-2.76	1.35e-05	-0.07	0.998	-1.66	0.00598	0.53	0.861
XF37_21320	membrane protein	1	0.8	0.000202	-0.17	0.904	-1.07	0.0292	-0.3	0.991
XF37_21325	hypothetical protein	3	-3.79	6.84e-05	-1.84	0.446	-0.88	0.442	-0.81	0.888
XF37_21330	arsenate reductase	2	-2.35	0.000254	-0.47	0.981	1.03	0.184	-1.5	0.0666
XF37_21335	arsenical pump membrane protein	1	-2.41	0.00199	-0.24	0.998	-0.59	0.524	0.09	1
XF37_21340	ArsR family transcriptional regulator	2	-2	0.000183	0.22	0.998	-1.13	0.177	-0.01	1
XF37_21350	hypothetical protein	5	3.9	1.92e-05	1.18	0.568	0.97	0.17	0.88	0.37
XF37_21380	universal stress global response regulator UspA	5	1.72	4.55e-08	-0.13	0.989	-0.54	0.404	-0.02	1
XF37_21385	universal stress protein UspB	5	2.34	6.21e-07	0.08	0.998	-0.09	0.945	0.3	1
XF37_21390	phosphate transporter PitA	2	-1.57	3.86e-07	0.41	0.616	-0.67	0.559	-0.03	1
XF37_21420	hypothetical protein	3	-3.56	0.000341	-1.02	0.904	-0.9	0.585	-0.64	1
XF37_21430	membrane protein	5	1.54	0.0025	-0.36	0.981	-0.72	0.303	-0.22	1
XF37_21440	membrane protein	1	0.1	0.841	-0.86	0.629	-1.39	0.0278	-0.57	0.865
XF37_21445	hexulose-6-phosphate synthase	1	-0.21	0.596	0.3	0.98	-1.91	0.000843	-0.46	0.912
XF37_21450	DNA repair protein	1	-0.47	0.366	0.2	0.998	-1.5	0.0219	-0.11	1
XF37_21465	carbohydrate kinase	2	-1.22	0.000855	0.3	0.976	0.33	0.795	-0.18	1
XF37_21470	PTS system galactitol-specific transporter subunit IIC	2	-1.16	0.0394	-0.58	0.96	0.25	0.849	-0.78	0.699
XF37_21475	PTS sugar transporter subunit IIB	2	-1.13	0.0516	-0.43	0.986	1.05	0.0851	-1.71	0.0122
XF37_21495	nickel ABC transporter ATP-binding protein	1	-2.08	0.000503	-0.21	0.998	-0.33	0.804	0.96	0.576
XF37_21500	nickel ABC transporter ATP-binding protein	2	-2.65	0.00135	0.01	0.999	0.15	0.913	-0.16	1
XF37_21505	nickel transporter permease NikC	2	-2	0.000864	-0.67	0.903	0.11	0.957	-0.87	0.856
XF37_21510	nickel transporter permease NikB	3	-4.07	0.000225	1.79	0.613	-0.39	0.843	0.63	1
XF37_21515	nickel ABC transporter substrate-binding protein	3	-3.99	2.33e-08	0.79	0.748	0.36	0.738	0.06	1
XF37_21555	membrane protein	2	-1.39	0.0104	0.37	0.989	-0.38	0.665	0.29	1
XF37_21560	4-hydroxybenzoyl-CoA thioesterase	2	-1.34	0.00102	-0.22	0.998	-1.08	0.138	-0.66	0.696
XF37_21565	acyltransferase	2	-1.57	0.00104	0.36	0.982	-0.8	0.369	0.02	1
XF37_21570	hydroxymyristoyl-ACP dehydratase	3	-2.37	0.00124	0.98	0.769	-0.64	0.642	-1.23	0.566
XF37_21580	DNA gyrase subunit B	2	-1.88	4.28e-05	0.03	0.998	-0.24	0.858	0.24	1
XF37_21590	acyl carrier protein	2	-2.03	0.000362	0.55	0.931	-0.51	0.645	-0.45	1
XF37_21600	beta-ketoacyl synthase, N-terminal domain protein	2	-1.25	0.00509	-0.18	0.998	0.28	0.795	0.49	0.943
XF37_21605	methyltransferase	2	-1.07	0.000137	-0.18	0.991	0.55	0.389	-0.08	1
XF37_21610	lipoprotein	2	-1.01	0.00235	-0.34	0.944	0.69	0.491	-0.17	1
XF37_21615	permease	5	1.63	0.00014	0.38	0.903	-0.14	0.92	0.33	1
XF37_21635	sulfur transfer protein SirA	2	-1.17	0.00784	-0.45	0.944	0.68	0.462	-0.49	0.943
XF37_21640	zinc ABC transporter ATPase	5	2.02	0.000171	-0.23	0.998	-0.09	0.942	1.08	0.252
XF37_21660	16S rRNA methyltransferase	2	-1.35	0.00053	-0.09	0.998	-0.85	0.218	-0.02	1
XF37_21685	leucine ABC transporter substrate-binding protein	4	3.29	3.59e-09	-1.05	0.142	2.82	5.15e-05	-0.49	0.947	Leucine/isoleucine/valine (liv) transporter operon
XF37_21705	leucine ABC transporter substrate-binding protein	4	2.68	2.13e-05	-0.92	0.586	3.63	7.07e-07	-0.58	0.847
XF37_21710	branched-chain amino acid transporter permease subunit LivH	4	2.39	0.000219	-0.63	0.867	3.71	2.46e-07	-0.85	0.477
XF37_21715	leucine/isoleucine/valine transporter permease subunit	4	3.19	9.07e-07	-1.06	0.365	4.15	1.67e-08	-0.98	0.298
XF37_21720	leucine/isoleucine/valine transporter ATP-binding subunit	4	3.46	1.84e-05	-0.81	0.789	3.86	5.53e-06	-1.14	0.399
XF37_21725	leucine/isoleucine/valine transporter ATP-binding subunit	4	3.59	6.96e-06	-0.87	0.717	3.57	2.75e-06	-1.37	0.149
XF37_21730	membrane protein	4	3.04	6.87e-05	-3.09	0.00195	2.59	0.000841	-1.72	0.049
XF37_21735	glycerol-3-phosphate ABC transporter substrate-binding protein	5	2.01	1.22e-11	-0.33	0.46	0.08	0.94	-0.25	1
XF37_21740	glycerol-3-phosphate transporter permease	5	1.06	0.0108	-0.09	0.998	-0.17	0.876	-0.11	1
XF37_21760	hypothetical protein	5	3.24	5.88e-13	0.48	0.229	-1.31	0.0185	0.82	0.357
XF37_21775	hypothetical protein	2	-1.96	0.00477	-0.79	0.843	-0.86	0.419	-1.44	0.346
XF37_21795	quercetin 2,3-dioxygenase	1	1.4	2.83e-05	1.63	0.00023	-0.21	0.857	1.09	0.317
XF37_21810	gluconate transporter	2	-1.63	0.0429	-0.38	0.998	0.85	0.586	-0.36	1
XF37_21840	aspartate-semialdehyde dehydrogenase	2	0.01	0.946	-0.22	0.731	1.6	0.0293	-0.87	0.56
XF37_21895	intramembrane serine protease GlpG	2	-1.61	7.13e-05	0.33	0.969	0.01	0.995	0.31	1
XF37_21900	transcriptional regulator	2	-1.26	0.0209	-0.1	0.998	-0.35	0.68	0.19	1
XF37_21930	transcriptional regulator MalT	5	1.34	2.79e-08	-0.2	0.831	-0.62	0.265	-0.67	0.491
XF37_21935	maltose phosphorylase	2	-1.86	9.97e-09	-0.29	0.865	-0.19	0.873	-0.06	1
XF37_21940	4-alpha-glucanotransferase	2	-2.21	2.15e-07	0.07	0.998	-0.21	0.818	-0.23	1
XF37_21965	transposase	1	-1.64	0.0386	-1.62	0.46	0.63	0.593	0.63	0.919
XF37_21970	ferrous iron transporter C	2	-1.72	0.0113	-0.05	0.998	-0.54	0.698	-0.33	1
XF37_21975	ferrous iron transporter B	1	-2.26	2.13e-05	-0.48	0.956	0.13	0.928	0.29	1
XF37_21980	ferrous iron transporter A	2	-2.3	2.05e-07	0.43	0.857	0.45	0.61	0.86	0.478
XF37_21985	transcription accessory protein	2	-1.55	9.41e-06	-0.07	0.998	0.98	0.0711	0.31	1
XF37_22020	Hsp33-like chaperonin	2	-1.14	0.000628	0.38	0.862	-0.5	0.568	0.33	1
XF37_22040	adenosine nucleotide hydrolase	2	-1.41	0.000161	0.25	0.986	0.25	0.805	0.13	1
XF37_22045	penicillin-binding protein 1A	2	-1.93	1.82e-05	0.16	0.998	1.05	0.0956	0.23	1
XF37_22060	DNA utilization protein HofO	4	0.96	0.136	-3.46	0.00119	0.35	0.812	-0.53	1
XF37_22065	DNA utilization protein HofP	1	0.07	0.937	-0.38	0.998	-1.05	0.352	2.2	0.0427
XF37_22075	shikimate kinase	2	-1.28	2.74e-05	-0.22	0.981	0.88	0.266	0.24	1
XF37_22085	cell division protein DamX	2	-1.18	0.000254	0.19	0.989	-0.29	0.797	-0.02	1
XF37_22090	DNA adenine methylase	2	-1.01	0.00455	-0.34	0.962	0.01	0.995	-0.01	1
XF37_22100	phosphoglycolate phosphatase	2	-1.21	0.00306	-0.4	0.959	-0.6	0.541	-0.2	1
XF37_22140	membrane protein	5	1.78	0.0477	-1.39	0.494	-0.4	0.805	0.41	1
XF37_22150	nitrite transporter NirC	1	-2.28	0.000372	-1.27	0.572	0.48	0.587	0.23	1
XF37_22155	nitrite reductase	3	-5.46	3.58e-06	2.23	0.323	-0.53	0.704	0.24	1
XF37_22160	nitrite reductase	3	-4.2	2.82e-12	0.77	0.379	-0.04	0.977	0.34	1
XF37_22165	transporter	2	-2.27	0.000177	0.05	0.998	1.53	0.0312	0.25	1
XF37_22170	peptidylprolyl isomerase	2	-3.08	2.56e-06	0.29	0.998	-0.98	0.321	0.19	1
XF37_22175	hypothetical protein	5	2.54	2.85e-06	0.1	0.998	-0.62	0.357	0.22	1
XF37_22180	cell filamentation protein Fic	5	1.64	5.8e-06	0.14	0.998	-1.07	0.0765	-0.07	1
XF37_22190	acetylornithine aminotransferase	4	1.19	1.06e-06	-1.69	0.000126	2.96	7.76e-05	-0.83	0.649
XF37_22220	hypothetical protein	5	1.36	0.000569	-0.24	0.989	-0.19	0.861	-0.04	1
XF37_22230	ABC transporter ATP-binding protein	2	-1.14	0.000178	-0.09	0.998	-0.04	0.978	0	1
XF37_22235	potassium transporter KefG	5	1.91	0.000307	-0.85	0.588	-0.03	0.977	0.37	1
XF37_22240	potassium transporter KefB	5	1.12	0.000187	-0.24	0.964	0.2	0.851	0.29	1
XF37_22285	30S ribosomal protein S12	2	-2.09	4.39e-10	0.1	0.998	0.25	0.811	0.13	1
XF37_22290	30S ribosomal protein S7	2	-2.44	2.93e-09	0.37	0.715	0.1	0.93	0.14	1
XF37_22295	elongation factor G	2	-1.89	1.27e-10	0.11	0.981	0	0.999	-0.02	1
XF37_22325	L,D-transpeptidase	5	2.31	2.26e-09	0.24	0.923	-0.67	0.446	0.05	1
XF37_22335	nitrogen assimilation transcriptional regulator	4	3.13	1.86e-08	0.37	0.862	5	3.15e-09	-0.73	0.666
XF37_22340	transcriptional regulator Cbl	4	2.98	1.18e-08	0.26	0.964	2.92	6.26e-05	0.07	1
XF37_22355	hypothetical protein	4	1.14	0.145	-2.69	0.0353	0.22	0.894	-0.35	1
XF37_22365	ABC transporter ATPase	2	-2.22	2.02e-07	0.34	0.923	-0.44	0.545	-0.16	1
XF37_22435	hypothetical protein	4	-1.5	0.00753	-1.47	0.308	0.42	0.738	-2.06	0.0327
XF37_22440	cytochrome O ubiquinol oxidase	3	-2.39	0.00118	0.58	0.974	-2.67	0.00922	3	0.00855
XF37_22460	transcriptional regulator	1	-1.11	0.0379	-0.51	0.969	-1.91	0.00134	-0.72	0.542
XF37_22465	endopeptidase	4	1.03	0.0206	0.2	0.998	0.54	0.534	-0.24	1
XF37_22470	membrane protein	4	1.43	0.00606	-0.01	0.998	1.5	0.0614	-0.45	1
XF37_22500	phospholipase	2	-1.14	0.00502	0.82	0.434	0.04	0.973	0.01	1
XF37_22520	hypothetical protein	4	1.36	0.000574	-0.39	0.909	1.56	0.00313	-0.37	0.943
XF37_22535	holin	2	-2.47	3.4e-05	-0.16	0.998	2.23	0.00167	-1.8	0.0488
XF37_22540	lysozyme	2	-2.76	0.0157	0.28	0.998	1.55	0.123	0	1
XF37_22580	hypothetical protein	1	0.93	0.351	-2.21	0.229	-1.97	0.0185	0.27	1
XF37_22585	plasmid partitioning protein ParA	1	-0.47	0.546	-1.13	0.629	-0.64	0.441	1.98	0.00818
XF37_22605	DNA breaking-rejoining protein	2	-1.59	0.0112	0.51	0.942	0.76	0.488	-1.25	0.341
XF37_22625	hypothetical protein	2	-1.57	0.016	1.28	0.452	-1.18	0.339	0.1	1
XF37_22640	tail protein	4	0.24	0.722	-3.19	0.0025	-1.19	0.184	-0.76	0.847
XF37_22680	cytotoxin	2	-2.37	7e-05	-0.31	0.998	-0.32	0.729	-0.02	1
XF37_22685	cytotoxin	3	-4.52	1.17e-11	0.7	0.602	-1.48	0.0338	-1.4	0.126
XF37_22690	DDE endonuclease	2	-2.35	3e-08	-0.04	0.998	-0.31	0.74	-1.59	0.0409
XF37_22695	T3SS effector protein NleE	3	-4.38	2.16e-09	-0.06	0.998	-1.29	0.0359	-0.38	1
XF37_22700	non-LEE encoded effector protein NleB	3	-3.83	1.32e-09	0.78	0.604	-1.04	0.177	-1.03	0.457
XF37_22705	enterotoxin	3	-3.67	3.31e-12	1.25	0.0175	-2.19	0.000191	-0.37	1
XF37_22715	integrase	3	-2.93	0.000741	0.75	0.968	-1.57	0.0482	-0.89	0.587
XF37_22740	hypothetical protein	1	-1.43	0.0104	-1.25	0.32	0.18	0.899	0	1
XF37_22750	transposase	5	1.53	1.96e-07	-0.18	0.978	0.34	0.726	-0.22	1
XF37_22790	hypothetical protein	2	-1.11	0.00543	-0.4	0.947	-0.73	0.269	-0.01	1
XF37_22805	endonuclease	2	-1.43	0.00843	-0.08	0.998	0.48	0.771	-0.68	0.947
XF37_22810	gene expression modulator	3	-2.33	0.000989	-1.01	0.681	-1.61	0.148	1.71	0.231
XF37_22820	replication protein	5	1.29	4.65e-06	-0.27	0.872	-1.29	0.0211	-0.01	1
XF37_22825	leader peptide RepL	5	1.61	6.69e-07	-0.6	0.343	-0.44	0.523	0.14	1
XF37_22870	transposase	2	-1.47	0.0025	-0.18	0.998	2.09	0.0002	-1.32	0.0666
XF37_22880	hypothetical protein	2	-2.45	3.12e-05	-0.19	0.998	0.77	0.441	0.69	0.776
XF37_22895	hypothetical protein	1	-0.09	0.902	-0.71	0.829	-2.61	0.0011	3	0.001
XF37_22905	bifunctional enterobactin receptor/adhesin protein	2	-2.38	1.28e-07	0.35	0.944	-0.92	0.197	0.27	1
XF37_22935	tellurium resistance protein TerC	2	-1	0.000264	0.18	0.988	0.27	0.781	0.19	1
XF37_22955	hypothetical protein	2	-1.63	0.0271	-0.31	0.998	-0.52	0.544	-0.17	1
XF37_22975	transposase	5	1.38	1.66e-07	0.21	0.886	0.35	0.723	0.12	1
XF37_22995	glycerol-3-phosphate dehydrogenase	3	-4.34	2.52e-06	-1.4	0.616	-0.14	0.895	0.07	1
XF37_23000	glycerol-3-phosphate dehydrogenase	2	-2.61	0.000161	-0.31	0.998	0.66	0.461	-0.56	0.869
XF37_23005	glycerol-3-phosphate dehydrogenase	1	-2.95	0.000498	-0.97	0.862	-0.61	0.592	1.53	0.14
XF37_23010	sn-glycerol-3-phosphate transporter	3	-3.45	9.97e-09	0.22	0.998	-1.41	0.104	0.25	1
XF37_23015	glycerophosphodiester phosphodiesterase	2	-2.27	6.69e-07	0.15	0.998	-0.61	0.602	0.39	1
XF37_23020	hypothetical protein	3	-4.69	1.8e-08	1.32	0.418	-3.13	1.54e-06	0.5	0.853
XF37_23025	transcriptional regulator	2	-1.87	1.46e-05	-0.03	0.998	-0.96	0.228	-0.26	1
XF37_23040	2Fe-2S ferredoxin	4	-1.06	0.283	-2.04	0.428	1.93	0.00115	-0.12	1
XF37_23045	ribonucleotide-diphosphate reductase subunit beta	2	-1.57	0.00149	-0.43	0.976	1.18	0.0522	-0.21	1
XF37_23050	ribonucleotide-diphosphate reductase subunit alpha	2	-1.18	8e-06	-0.08	0.998	2.67	0.00303	-0.04	1
XF37_23055	hypothetical protein	4	-0.49	0.294	-0.46	0.959	4.51	1.69e-09	0.35	1
XF37_23070	DNA gyrase subunit A	2	-1.27	8.61e-07	-0.1	0.998	0.79	0.236	0.14	1
XF37_23100	histidine kinase	2	-1.21	1.33e-05	0.13	0.998	-0.21	0.89	0.21	1
XF37_23125	membrane protein	1	-1.69	9.87e-11	-0.58	0.0108	-1.72	0.000794	-0.6	0.588
XF37_23130	thiamine biosynthesis protein ApbE	2	-2.42	1.9e-05	0.39	0.983	-0.8	0.229	0.38	0.997
XF37_23135	6-O-methylguanine DNA methyltransferase	5	1.56	4.01e-06	0.65	0.239	-0.28	0.781	0.28	1
XF37_23140	alpha-ketoglutarate-dependent dioxygenase	5	1.06	0.0127	0.21	0.998	0.04	0.981	-0.13	1
XF37_23145	multidrug transporter membrane component/ATP-binding component	2	-1.83	2.99e-05	0.19	0.998	0.29	0.783	0.35	1
XF37_23150	malate:quinone oxidoreductase	2	-2.27	1.93e-08	0.38	0.843	0.44	0.575	0.5	0.864
XF37_23155	ecotin	1	-0.3	0.246	-0.05	0.998	-1.28	0.0497	-0.32	1
XF37_23165	ferredoxin	2	-2.29	0.00302	-0.2	0.998	-0.46	0.631	0.33	1	Nitrate reductase-cytocrhrome c maturation (nap-ccm) locus
XF37_23170	nitrate reductase	3	-3.76	3.78e-05	-1.38	0.64	-0.88	0.536	-0.45	1
XF37_23175	nitrate reductase	3	-4	4.27e-10	-0.09	0.998	-1.08	0.2	0.2	1
XF37_23180	quinol dehydrogenase	3	-3.93	4.82e-09	0.09	0.998	-3.94	4.32e-06	3.61	8.39e-05
XF37_23185	quinol dehydrogenase	3	-3.68	6.1e-10	-0.31	0.989	-1.18	0.23	-1.68	0.217
XF37_23190	nitrate reductase	3	-3.88	6.98e-09	0.32	0.997	-0.44	0.797	-0.53	1
XF37_23195	cytochrome C	2	-2.05	0.000484	-0.06	0.998	-0.46	0.523	-0.33	1
XF37_23200	cytochrome C biogenesis protein CcmA	2	-2.22	0.000458	-0.04	0.998	0.15	0.911	0.28	1
XF37_23205	heme ABC transporter permease	3	-4.33	2.48e-07	0.73	0.912	-0.26	0.805	0.47	0.909
XF37_23210	heme ABC transporter permease	2	-3.23	1.47e-08	0.95	0.371	0.09	0.95	-0.63	0.821
XF37_23215	cytochrome C biogenesis protein CcmD	3	-4.79	1.92e-08	2.68	0.0189	-1.33	0.0779	-0.3	1
XF37_23220	cytochrome C biogenesis protein CcmE	3	-3.16	2.04e-05	0.75	0.894	-1.76	0.195	1.07	0.791
XF37_23225	cytochrome C biogenesis protein CcmF	1	-2.75	4.85e-07	-0.71	0.78	-0.83	0.445	0.05	1
XF37_23230	thiol:disulfide interchange protein DsbE	2	-2.51	0.0105	1.53	0.665	-0.41	0.823	-0.71	0.982
XF37_23235	heme lyase subunit CcmH	1	-1.6	0.000102	-0.07	0.998	-1.42	0.0495	0.47	0.978
XF37_23240	transcriptional regulator NarP	2	-1.28	0.000176	0.22	0.989	0.41	0.614	-0.54	0.859
XF37_23270	nucleoid-associated protein NdpA	2	-1.11	5.59e-05	-0.26	0.933	0.76	0.291	0.16	1
XF37_23275	50S ribosomal protein L25	2	-1.15	0.0016	-0.09	0.998	0.24	0.805	0.28	1
XF37_23295	hypothetical protein	5	2.03	3.07e-07	0.29	0.919	-0.45	0.598	-0.11	1
XF37_23330	membrane protein	1	-2.29	3.19e-05	-0.61	0.898	-0.49	0.637	0.44	0.982
XF37_23335	hypothetical protein	2	-1.52	9.89e-06	0.37	0.856	0.63	0.378	0.38	0.991
XF37_23345	elongation factor P	2	-2.51	8.6e-07	0.04	0.998	0.15	0.899	-0.2	1
XF37_23350	hypothetical protein	2	0.08	0.906	0.07	0.998	2.78	0.000164	0.86	0.564
XF37_23360	bifunctional PTS system fructose-specific transporter subunit IIA/HPr protein	2	-1.55	5.35e-06	0.48	0.606	0.06	0.96	0.8	0.474
XF37_23365	1-phosphofructokinase	2	-1.94	1.87e-05	0.06	0.998	-0.08	0.946	0.32	1
XF37_23370	PTS system fructose-specific transporter subunits IIBC	2	-2.24	2.06e-08	0.29	0.923	-0.32	0.756	0.5	0.943
XF37_23375	pseudouridine kinase	1	-1.67	0.00241	-0.34	0.998	-1.74	0.167	0.1	1
XF37_23380	pseudouridine-5'-phosphate glycosidase	4	-1.53	0.0242	-1.16	0.602	-0.67	0.396	-2.11	0.0189
XF37_23395	ribonucleoside hydrolase	4	-1.59	0.00328	-2.92	0.0019	-0.4	0.74	-1.27	0.413
XF37_23420	transcriptional regulator	5	1.41	0.000846	0.04	0.998	-0.28	0.811	0.18	1
XF37_23430	hypothetical protein	3	-3.01	0.000878	1.78	0.418	-0.2	0.892	-1.67	0.16
XF37_23445	hypothetical protein	5	2	0.000167	-0.52	0.862	-1.36	0.0662	0.43	0.997
XF37_23475	sugar ABC transporter ATP-binding protein	2	-0.24	0.282	-0.44	0.503	0.83	0.223	-1.73	0.0322
XF37_23480	beta-methylgalactoside transporter permease	2	0.03	0.935	-0.76	0.403	1.38	0.0391	-1.44	0.0942
XF37_23490	dihydropyrimidine dehydrogenase	4	1.04	0.000297	-1.07	0.0537	0.49	0.632	-1.8	0.0699
XF37_23495	hypothetical protein	2	-1.65	0.00466	0.14	0.998	1.2	0.146	-0.21	1
XF37_23515	hypothetical protein	4	1.11	0.0136	0.02	0.998	1.2	0.059	-0.81	0.537
XF37_23525	4-hydroxybenzoate transporter	5	4.8	2.55e-12	-0.63	0.336	1.44	0.0531	-0.33	1
XF37_23530	gentisate 1,2-dioxygenase	5	4.65	4.98e-12	-0.67	0.312	1.37	0.128	-0.31	1
XF37_23535	5-carboxymethyl-2-hydroxymuconate isomerase	5	4.45	1e-09	-0.92	0.312	1.45	0.0386	-0.5	0.956
XF37_23540	maleylacetoacetate isomerase	5	4.08	6.04e-10	-0.84	0.308	1.12	0.147	-0.31	1
XF37_23545	salicylate hydroxylase	5	4.2	1.38e-14	-0.89	0.0149	0.26	0.773	-0.29	1
XF37_23555	hypothetical protein	5	2.86	2.59e-08	0.22	0.989	-0.39	0.702	-0.1	1
XF37_23560	multidrug resistance outer membrane protein MdtQ	2	-1.15	0.0266	0.6	0.862	-0.51	0.695	1.27	0.302
XF37_23565	oxidoreductase	5	3.35	2.01e-06	0.5	0.888	-0.35	0.729	0.27	1
XF37_23570	membrane protein	5	1.81	8.85e-07	0.07	0.998	0.07	0.955	-0.15	1
XF37_23575	membrane protein	5	4.06	6.04e-11	0.66	0.272	-0.68	0.402	0.03	1
XF37_23590	beta-D-glucoside glucohydrolase	2	-1.03	0.00194	-0.23	0.989	-0.01	0.994	0.27	1
[truncated: 421 more rows]

## Sheet: STm 14028s
Dataset S11. Output from hierarchical analysis shown in Figure S10. Gene description, cluster number within category, Log2 fold change (FC), and adjusted p-value are shown for each gene along the treatments. Name of operons or gene clusters is also shown. Columns corresponding to Log2 FC values are highlighted according to a color scale; red (upregulation) to black (downregulation). Log2 FC value…
Gene ID	Gene description	Cluster #	Hierarchical order	Treatments								Operon/gene cluster name
				At		At		Ls		Ls
				4 HPI vs. inoculum		24 vs. 4 HPI		4 HPI vs. inoculum		24 vs. 4 HPI
				Log2 FC	Adj. p-value	Log2 FC	Adj. p-value	Log2 FC	Adj. p-value	Log2 FC	Adj. p-value
MC58_00020	beta-lactamase	1	2516	-1.37781	0.000666534	0.00230975	0.997596	-0.580295	0.0426484	-0.265359	0.774433
MC58_00025	6-carboxy-5,6,7,8-tetrahydropterin synthase	2	296	-2.19009	2.90328e-05	0.131062	0.90888	2.36303	0.0123127	0.898137	0.622109
MC58_00030	sulfite reductase subunit alpha	3	828	-0.869376	0.00175596	0.718434	0.0637872	1.64021	0.00135284	-0.169072	0.918471
MC58_00035	sulfite reductase subunit beta	3	945	-1.5362	1.4887e-06	0.899824	0.016061	1.36546	0.000302198	-0.389861	0.612602
MC58_00050	helicase	1	2868	-2.35391	2.70718e-06	0.369065	0.708253	0.122179	0.81658	-0.295392	0.847329
MC58_00055	CRISPR-associated protein CasA	1	2705	-1.8618	8.5642e-06	0.65236	0.362221	-0.273875	0.699777	-0.256799	0.910993
MC58_00060	transposase	1	2589	-1.74667	0.000370741	0.164917	0.88127	-0.527679	0.293585	-0.428764	0.705709
MC58_00065	CRISPR-associated protein Cse4	3	1032	-1.09685	0.000319158	0.233556	0.710939	0.0511646	0.936683	-0.617815	0.601505
MC58_00075	CRISPR-associated protein Cas6	3	1011	-1.08638	0.0498964	0.103445	0.932041	1.73038	0.00526428	-0.524749	0.708274
MC58_00080	CRISPR-associated protein Cas1	1	2719	-1.60645	4.21463e-06	0.365681	0.568523	0.213125	0.681571	-0.203727	0.912195
MC58_00085	ssRNA endonuclease	1	2327	-1.31493	0.00898748	-0.282162	0.795995	-0.487788	0.556552	-0.858131	0.530677
MC58_00090	alkaline phosphatase	1	1310	-2.79256	2.75754e-11	1.18934	0.0052135	-0.260991	0.53439	0.504811	0.533755
MC58_00095	sulfate adenylyltransferase subunit 2	3	877	-1.21488	0.000102787	1.19097	0.00184575	1.67597	1.22012e-05	0.535857	0.241742
MC58_00100	sulfate adenylyltransferase subunit 1	3	881	-0.790335	0.0053601	1.10486	0.00318042	1.71672	0.00172097	0.43612	0.711611
MC58_00105	adenylylsulfate kinase	3	879	-0.715715	0.0623745	1.24705	0.0422626	1.19318	0.0171545	0.189205	0.919894
MC58_00110	hypothetical protein	3	685	1.36989	8.16238e-05	0.219352	0.714618	1.6578	0.00366883	0.604534	0.646021
MC58_00115	cell division protein FtsB	1	1505	-1.37567	1.63729e-05	0.485914	0.358949	0.581277	0.241708	0.118094	0.948218
MC58_00120	2-C-methyl-D-erythritol 4-phosphatecytidylyltransferase	3	1039	-2.1826	3.27188e-09	0.241744	0.685386	0.680813	0.142344	-0.72854	0.475367
MC58_00125	2-C-methyl-D-erythritol 2,4-cyclodiphosphatesynthase	1	2770	-2.27445	4.67426e-09	0.0475564	0.945136	0.212471	0.812983	0.137348	0.964501
MC58_00130	tRNA pseudouridine synthase D	1	2519	-1.52409	6.1497e-09	-0.352402	0.342082	-0.340944	0.385439	0.256349	0.832751
MC58_00150	RNA polymerase sigma factor RpoS	3	556	1.49054	1.11182e-07	0.0829161	0.845431	-0.144854	0.634504	0.360002	0.380396
MC58_00160	phenolic acid decarboxylase	1	1334	-2.50821	7.44694e-05	0.211281	0.874743	-0.747038	0.0750579	2.18858	0.000117688
MC58_00165	phenolic acid decarboxylase	1	1345	-3.45431	1.4584e-05	-0.0602351	0.970474	-0.335574	0.600506	2.07631	0.000664568
MC58_00170	transcriptional regulator	1	1367	-1.37907	0.0073523	1.03896	0.249774	-0.429265	0.301285	0.646054	0.383863
MC58_00175	DeoR faimly transcriptional regulator	3	884	-1.09232	0.00436234	0.917018	0.162546	2.09416	2.86119e-05	-0.386398	0.765314
MC58_00180	3-hydroxyisobutyrate dehydrogenase	2	302	-1.91192	6.09423e-08	0.258277	0.667043	4.06106	8.30343e-10	-0.913299	0.153191
MC58_00185	membrane protein	2	303	-2.06219	1.43579e-07	0.26856	0.704119	3.98956	5.72228e-07	-1.18191	0.246206
MC58_00190	aldolase	2	312	-2.75822	1.37583e-09	0.220748	0.770734	3.44153	2.30097e-06	-0.829706	0.475367
MC58_00195	hypothetical protein	2	308	-2.7942	1.20605e-09	0.405101	0.564322	2.56615	6.22688e-07	-1.04546	0.120771
MC58_00200	hypothetical protein	2	310	-2.14066	1.68698e-06	0.3859	0.64224	3.08319	2.39057e-06	-0.609468	0.577254
MC58_00205	gluconate permease	3	875	-1.81038	4.81567e-05	0.353826	0.693359	2.10407	0.000399676	-0.660365	0.635638
MC58_00215	membrane protein	3	965	-0.796066	0.179245	0.317068	0.789423	1.08506	0.0124101	0.409148	0.641448
MC58_00225	DNA mismatch repair protein MutS	1	1830	-1.89689	9.95725e-08	0.214373	0.724697	0.435241	0.293462	-0.387855	0.752553
MC58_00245	serine/threonine protein phosphatase	1	2251	-2.77687	8.8388e-07	-0.255974	0.822245	0.913086	0.151774	-0.192264	0.918471
MC58_00255	acetyltransferase	3	614	2.26408	4.3005e-08	-0.480775	0.370908	0.229082	0.647648	0.0556497	0.976632
MC58_00260	ABC transporter	3	372	1.73661	2.49089e-08	-0.16887	0.715703	-0.236509	0.614053	0.0808089	0.960135
MC58_00265	invasion lipoprotein InvH	1	2175	-2.95454	1.24006e-05	-0.117026	0.930986	1.68727	0.0241819	-2.26048	0.0161203	Salmonella pathogenicity island-1 (SPI-1)
MC58_00270	transcriptional regulator InvF	1	2514	-1.3977	0.0402965	-0.156293	0.91786	-0.63634	0.52514	-0.0622117	0.982044
MC58_00275	type III secretion system outer membrane pore InvG	1	2153	-1.40554	0.00857864	-1.27795	0.190696	0.899833	0.069339	-0.19143	0.907366
MC58_00280	type III secretion system regulator InvE	1	1349	-2.68119	0.00563347	-1.00416	0.649799	-0.352162	0.687171	1.60955	0.0857846
MC58_00285	type III secretion system protein InvA	3	500	-2.90514	5.30677e-06	-1.75024	0.128825	0.187537	0.7763	-2.56342	0.000524684
MC58_00290	type III secretion system chaperone SpaK	1	2160	-2.38758	0.004236	-1.60934	0.363462	0.0335307	0.973931	-0.590439	0.759218
MC58_00295	ATP synthase	1	2158	-2.09069	0.00178286	-1.87999	0.150816	0.368651	0.505923	-0.741756	0.270429
MC58_00300	type III secretion system protein SpaM	1	1106	-5.72287	2.34918e-06	2.42866	0.178728	-0.0830954	0.880774	0.142244	0.912195
MC58_00305	antigen presentation protein SpaN	1	1970	-2.68917	0.000104182	0.109765	0.93973	-0.44309	0.670001	-0.701265	0.720248
MC58_00310	type III secretion system protein SpaO	3	502	-3.26814	6.75944e-06	-2.14179	0.134878	-0.328631	0.53439	-1.65014	0.00957017
MC58_00315	Surface presentation of antigens protein SpaP	3	499	-2.96392	3.19277e-05	-2.91942	0.0422626	-1.07163	0.317779	-1.11639	0.584476
MC58_00330	type III secretion system protein SpaS	1	1975	-3.42521	1.58687e-07	-0.419019	0.724181	0.0939386	0.904759	-0.420887	0.774685
MC58_00335	chaperone protein SicA	1	2759	-2.04178	0.000249184	0.370001	0.735001	-0.342304	0.688384	-0.988387	0.43331
MC58_00340	pathogenicity island 1 effector protein SipB	1	2483	-2.12233	1.98668e-06	-0.798614	0.339916	-0.627684	0.194105	-1.21781	0.16044
MC58_00345	pathogenicity island 1 effector protein SipC	1	2504	-2.19493	3.96701e-06	0.11369	0.910402	-0.515899	0.292506	-0.45981	0.725768
MC58_00350	cell invasion protein SipD	1	2738	-2.86153	7.5829e-07	0.453004	0.678292	0.234909	0.566821	-1.00473	0.0587291
MC58_00355	pathogenicity island 1 effector protein SipA	1	2047	-3.48313	1.02441e-08	0.118948	0.91897	0.43171	0.34537	-0.349447	0.822424
MC58_00360	acyl carrier protein IacP	1	2234	-3.06923	2.03869e-09	-0.0964466	0.919813	1.28552	0.0481721	-1.05962	0.241742
MC58_00365	hypothetical protein	1	2264	-3.06742	1.75563e-10	0.347126	0.65055	0.974681	0.212704	-1.00512	0.379255
MC58_00370	chaperone protein SicP	1	1873	-4.02494	5.3671e-12	0.499529	0.537389	1.11576	0.109718	-0.0831159	0.973083
MC58_00375	pathogenicity island 1 effector protein StpP	1	1862	-4.26314	9.77046e-14	0.488183	0.467839	-0.0381573	0.951723	-0.992539	0.332227
MC58_00380	invasion protein IagB	1	2206	-1.8183	0.00237196	0.185368	0.884039	1.27879	0.045214	-1.36282	0.0592325
MC58_00385	invasion protein regulator	1	1755	-2.16554	0.00268067	0.0552849	0.970565	0.594446	0.34385	0.11489	0.945084
MC58_00390	transcriptional regulator HilD	1	1874	-3.3644	1.40235e-10	0.522775	0.504472	0.634755	0.154161	-0.211563	0.900392
MC58_00395	type III secretion system needle complex proteinPrgH	1	2137	-2.27853	0.000133234	-0.809696	0.467839	0.629925	0.261594	-1.39576	0.0432539
MC58_00400	type III secretion system needle complex proteinPrgI	3	495	-1.00293	0.120739	-3.15672	0.0151053	0.00582426	0.995403	-1.72824	0.0519462
MC58_00405	type III secretion system needle complex proteinPrgJ	3	549	-1.9807	0.00315739	-0.379219	0.78883	0.653794	0.474253	-1.51591	0.160543
MC58_00410	lipoprotein MxiJ	1	2764	-2.22325	4.0419e-06	0.0697246	0.944245	0.18085	0.719287	-1.17472	0.121548
MC58_00415	invasion protein OrgA	1	2167	-2.0725	0.00029371	-0.823555	0.441707	0.235685	0.647168	-0.468755	0.637054
MC58_00420	invasion protein OrgB	1	2342	-2.72171	5.6437e-07	-1.18468	0.180151	-0.652247	0.219631	-0.250818	0.891116
MC58_00425	type III secretion system effector protein OrgC	1	2471	-2.37925	7.59497e-06	-0.194889	0.862671	-0.641788	0.249149	0.173037	0.927144
MC58_00435	transcriptional regulator	1	1259	-1.1416	0.133573	-0.792146	0.622634	-1.52042	0.00314643	0.271016	0.847267
MC58_00440	effector protein YopJ	1	1265	-1.44893	0.00777101	-1.26789	0.19654	-1.0804	0.0198077	0.721799	0.44608
MC58_00445	iron ABC transporter permease	1	1238	-0.0505866	0.91042	-0.731076	0.421162	-2.48405	2.68408e-07	-0.57979	0.464243
MC58_00450	membrane protein	1	1235	-0.887276	0.0159665	-0.543189	0.498483	-3.06002	3.57922e-11	-0.118445	0.907587
MC58_00455	manganese/iron transporter ATP-binding protein	1	1234	-1.12909	0.00027116	-0.31145	0.636935	-3.13857	2.22947e-08	-0.0772231	0.959917
MC58_00460	iron ABC transporter substrate-binding protein	1	1236	-0.548715	0.0267404	-0.441434	0.353993	-3.50592	3.57922e-11	-0.170344	0.834946
MC58_00465	hypothetical protein	4	243	0.975659	0.124442	2.62146	0.00102799	-0.69773	0.154987	2.4108	0.000403939
MC58_00475	carbamoyl dehydratase HypE	1	1465	-1.79332	4.53684e-05	0.579876	0.479256	0.30198	0.617168	0.477488	0.751289
MC58_00480	hydrogenase isoenzymes formation protein HypD	1	2220	-2.67652	2.41401e-08	0.597847	0.431482	0.739542	0.0464219	-0.84867	0.188063
MC58_00485	hydrogenase assembly chaperone	1	2288	-2.71454	2.11486e-06	0.475779	0.663321	1.03263	0.0430507	-0.577378	0.53695
MC58_00490	hydrogenase nickel incorporation protein HypB	1	2284	-3.06055	3.12952e-09	0.556073	0.49009	0.906117	0.0133507	-0.525541	0.507887
MC58_00495	hydrogenase nickel incorporation protein	3	865	-2.09283	0.000199291	0.40593	0.72164	2.34509	0.000527106	-0.973133	0.225989
MC58_00515	hydrogenase 3 membrane subunit	1	1120	-3.95813	4.57494e-05	2.06422	0.160762	1.40446	0.183904	-1.84218	0.173228
MC58_00520	hydrogenase 3 large subunit	1	2346	-2.15741	0.00219432	-0.997045	0.492897	0.176282	0.785749	0.118582	0.941919
MC58_00525	formate hydrogenlyase complex iron-sulfur subunit	1	2139	-3.22904	1.59243e-05	-0.851531	0.572205	1.82404	0.0673217	-0.843277	0.604569
MC58_00530	formate hydrogenlyase	3	873	-1.41673	0.0168324	0.0167012	0.991266	1.87796	0.130221	-0.918442	0.677176
MC58_00535	formate hydrogenlyase maturation protein HycH	1	1746	-1.88815	0.0036396	-0.328111	0.808033	0.791625	0.186945	-0.220887	0.902626
MC58_00540	hydrogenase 3 maturation protease	1	1156	-2.58784	9.25854e-05	1.32081	0.213924	0.150887	0.792796	-0.0492682	0.976402
MC58_00550	formate dehydrogenase	3	870	-0.895548	0.175473	0.157071	0.910402	2.04512	0.000102911	-0.240149	0.830411
MC58_00555	carbamoyl phosphate phosphatase	1	1703	-1.97514	2.62126e-05	0.786653	0.330169	0.246431	0.678309	0.220861	0.918471
MC58_00560	NADH:flavorubredoxin oxidoreductase	1	1662	-1.51261	0.00495362	0.854133	0.368273	0.394743	0.544295	-0.864593	0.376318
MC58_00565	nitric oxide reductase	3	708	0.0233372	0.965697	0.676188	0.48015	1.59701	0.000735656	0.382198	0.750642
MC58_00575	arabinose 5-phosphate isomerase	1	2531	-1.15945	4.24012e-05	-0.239424	0.680987	-0.287479	0.345578	-0.372505	0.621722
MC58_00580	transcriptional regulator	1	2419	-1.91552	4.53921e-09	0.0894276	0.874881	-0.939479	0.0302043	0.162947	0.919894
MC58_00590	transcriptional regulator	1	2713	-1.7203	9.30428e-08	0.448605	0.373337	-0.155391	0.67129	-0.0620642	0.963916
MC58_00595	sorbitol-6-phosphate 2-dehydrogenase	1	2109	-2.61014	8.27417e-09	0.320106	0.682127	-0.29469	0.651127	-0.188407	0.919894
MC58_00600	PTS system glucitol/sorbitol-specific transportersubunit IIA	1	2022	-3.52043	2.22961e-11	0.796991	0.246827	-0.902159	0.141867	-0.531444	0.669665
MC58_00605	PTS system glucitol/sorbitol-specific transportersubunit IIB	1	2028	-4.06779	4.72039e-09	0.522724	0.660759	-0.787161	0.295006	-0.399458	0.84705
MC58_00610	PTS system glucitol/sorbitol-specific transportersubunit IIC	1	2004	-4.5773	2.24408e-11	0.553318	0.581676	-1.77537	0.00834711	-0.170745	0.937644
MC58_00630	recombination regulator RecX	3	966	-0.894552	0.0705393	0.390927	0.708253	1.15945	0.0181594	0.335251	0.819333
MC58_00635	alanyl-tRNA synthetase	1	2117	-2.91395	9.67943e-13	0.27096	0.513277	-0.139163	0.740911	-0.225622	0.839454
MC58_00640	carbon storage regulator	3	364	1.85293	7.33653e-06	0.0869784	0.905645	-0.389361	0.374143	-0.0630366	0.973573
MC58_00645	tRNA	2	320	1.80705	2.11962e-06	0.486852	0.342505	3.58484	2.22947e-08	0.27141	0.828078
MC58_00655	tRNA	2	327	0.94918	0.0350327	0.485969	0.544376	2.84019	1.17558e-05	0.0546736	0.977441
MC58_00660	tRNA	2	329	1.32845	0.040078	0.0904829	0.943777	3.09671	4.63363e-05	-0.0876737	0.96584
MC58_00675	membrane protein	3	718	0.376001	0.112092	-0.379744	0.402909	1.37402	0.00349289	0.050111	0.977441
MC58_00685	S-ribosylhomocysteinase	3	424	1.16885	5.60012e-05	-0.336101	0.510133	0.413839	0.219932	-0.659528	0.309949
MC58_00695	multidrug resistance protein B	3	958	-1.31932	0.00200107	0.562476	0.503566	1.48265	0.00131708	-0.782248	0.270237
MC58_00700	multidrug transporter	3	829	-0.719687	0.0636799	0.351466	0.676672	1.70868	3.27873e-05	0.274205	0.814948
MC58_00705	transcriptional repressor MprA	3	893	-0.635088	0.0226155	0.451634	0.373007	2.63081	8.50074e-08	0.233227	0.832751
MC58_00715	glycine/betaine ABC transporter substrate-bindingprotein	1	2432	-1.29296	6.622e-05	0.730134	0.161869	-0.51777	0.295193	0.372587	0.818642
MC58_00725	glycine/betaine ABC transporter ATP-bindingprotein	4	193	4.58211	1.10741e-10	0.281703	0.667043	2.7605	0.00224926	-1.24276	0.278524
MC58_00730	ribonucleotide-diphosphate reductase subunit beta	4	152	2.07498	9.56682e-05	0.860553	0.220662	-0.180553	0.7201	0.546321	0.6025
MC58_00735	hypothetical protein	4	154	2.13732	8.98964e-08	1.48397	9.63866e-05	-0.240842	0.533493	0.657614	0.258979
MC58_00740	ribonucleotide reductase stimulatory protein	4	144	2.96947	6.92163e-09	1.91832	1.38945e-05	-0.327903	0.578268	0.556773	0.700702
MC58_00745	glutaredoxin	4	145	4.24002	1.84667e-10	1.6356	0.000372566	-0.00406661	0.996357	1.05868	0.282069
MC58_00755	alkylhydroperoxidase	1	1664	-2.06501	0.0169573	1.40777	0.334936	-0.041498	0.955748	-0.0311758	0.98353
MC58_00765	hypothetical protein	4	53	4.96569	2.14101e-19	-0.0543138	0.896224	-0.914982	0.00116569	1.28134	0.000149478
MC58_00770	hypothetical protein	4	205	1.16577	0.00226779	1.03266	0.0482023	1.4037	0.0272191	2.37377	0.00224003
MC58_00775	membrane protein	1	1918	-3.31252	1.47289e-09	0.520204	0.541578	-1.67592	1.36357e-05	-0.185629	0.893558
MC58_00785	hypothetical protein	4	187	3.2996	1.28874e-11	-0.531614	0.255038	2.56045	4.92817e-07	0.220189	0.85977
MC58_00800	membrane protein	3	392	2.06014	2.35737e-10	0.255661	0.500245	-1.51212	0.0029268	-0.0464555	0.980777
MC58_00805	peptidoglycan-binding protein	3	602	2.48833	6.91038e-12	-0.373828	0.302453	-0.303443	0.394329	0.0353299	0.974428
MC58_00810	transcriptional regulator	4	177	3.58688	3.07887e-11	0.347927	0.486846	1.44051	0.000976253	-0.576314	0.571243
MC58_00815	gamma-aminobutyrate transporter	4	38	5.33448	1.67663e-14	0.110694	0.836858	0.59813	0.168454	-0.588536	0.539017
MC58_00820	4-aminobutyrate aminotransferase	4	37	4.92738	2.50209e-17	-0.0406816	0.933159	0.245892	0.690798	-0.361454	0.818735
MC58_00825	succinate-semialdehyde dehydrogenase	4	36	4.83796	6.06024e-16	0.208653	0.664812	-0.247677	0.605476	-0.399834	0.700702
MC58_00830	hydroxyglutarate oxidase	4	49	4.6726	3.19653e-16	0.699004	0.0588803	-1.38723	0.00552683	-0.445493	0.669665
MC58_00835	carbon starvation induced protein	4	51	5.31678	4.07131e-18	0.758323	0.0153642	-2.21516	1.66862e-06	-0.493797	0.420121
MC58_00840	tripartite tricarboxylate transporter TctA	4	176	3.81798	8.59467e-14	0.458747	0.234892	1.42622	0.000695102	-0.437949	0.558721
MC58_00845	membrane protein	4	178	3.81512	4.87512e-13	0.160084	0.730154	1.61767	1.89271e-05	-0.538243	0.420121
MC58_00850	tricarboxylic transport membrane protein	4	179	3.7583	4.0313e-13	0.331651	0.417992	1.10951	0.0148683	-0.1978	0.891091
MC58_00855	hypothetical protein	4	180	3.99841	1.46165e-12	0.399946	0.371851	2.09143	0.00217352	-0.223229	0.927482
MC58_00860	transcriptional regulator	1	1189	-0.367262	0.344729	0.700102	0.327112	-1.73027	0.000132366	-0.172525	0.91898
MC58_00880	antimicrobial resistance protein Mig-14	1	1110	-5.50969	1.63843e-13	0.44408	0.657402	-1.1188	0.0995528	-1.20695	0.219545
MC58_00885	VirG localization protein VirK	3	501	-2.64545	0.000124015	-1.67035	0.207233	-0.851518	0.217228	-2.13012	0.0233103
MC58_00890	effector protein PipB	3	518	0.234515	0.30452	-1.58592	0.000306156	1.06539	0.00314244	-0.33578	0.748525
MC58_00900	outer membrane receptor protein	1	1216	-1.21964	0.00191908	-0.255791	0.760186	-3.00017	1.56105e-08	-0.611285	0.469916
MC58_00905	hydrolase	1	1889	-3.22013	3.22972e-07	0.988943	0.324508	-1.04544	0.0407581	0.538921	0.662543
MC58_00910	enterochelin esterase	1	1290	-2.48373	1.2961e-06	0.105791	0.91786	-1.62888	0.0161068	-0.669899	0.6947
MC58_00915	multidrug ABC transporter ATPase	1	1270	-1.90861	6.64772e-05	0.289364	0.770734	-2.32637	7.18939e-06	-0.147328	0.936292
MC58_00920	glycosyl transferase	1	1272	-2.85661	1.32782e-06	0.751137	0.467839	-3.12648	7.92401e-08	0.0141549	0.990495
MC58_00925	transposase	1	2600	-1.0547	1.07506e-05	-0.270968	0.514125	0.328147	0.319564	-0.163856	0.890628
MC58_00940	transposase	3	1067	-1.20939	6.10122e-07	-0.253953	0.514125	0.442067	0.101722	-0.447915	0.396639
MC58_01180	secretion protein HlyD	2	342	0.940729	0.00032954	-2.17025	2.45723e-06	1.07005	0.00310185	-2.56834	0.000229453
MC58_01185	ATP-binding protein	2	344	1.34212	5.53739e-06	-2.17063	3.45344e-06	2.14759	2.58686e-05	-2.76848	0.00150176
MC58_01190	type I secretion protein TolC	2	343	1.89565	6.53416e-08	-2.07543	1.01167e-05	1.71506	1.78815e-06	-2.07931	0.000164276
MC58_01205	hypothetical protein	1	1532	-1.18864	3.72262e-05	0.0404547	0.945513	-0.346673	0.326678	-0.0630413	0.964501
MC58_01215	membrane biogenesis protein	1	2569	-1.39248	1.21096e-06	0.141435	0.77921	-0.487724	0.109718	0.286114	0.746415
MC58_01220	recombination and repair protein	3	360	1.68575	3.62516e-09	-0.115013	0.762497	-0.575596	0.0801569	0.141511	0.9012
MC58_01230	heat shock protein GrpE	1	2421	-1.61429	1.58015e-07	0.700367	0.103648	-0.665533	0.202804	0.600385	0.622109
MC58_01235	cytoplasmic protein	1	1449	-1.63193	0.000435308	-0.0286474	0.979713	0.0775878	0.892217	0.667372	0.464243
MC58_01240	hypothetical protein	1	2296	-2.62827	3.74159e-10	0.314897	0.612486	0.334594	0.386391	-0.390304	0.714763
MC58_01250	signal recognition particle	1	2576	-1.61899	1.10215e-07	0.220888	0.617536	-0.197901	0.525218	0.306177	0.620258
MC58_01255	30S ribosomal protein S16	1	2308	-2.43949	2.4307e-10	0.14317	0.770814	0.805925	0.0470927	-0.338428	0.783358
MC58_01260	16S rRNA-processing protein RimM	1	2259	-2.64297	1.98453e-11	0.0176554	0.97021	0.525277	0.210427	-0.51689	0.551304
MC58_01265	tRNA (guanine-N1)-methyltransferase	1	1991	-3.36367	5.2571e-14	0.090442	0.850639	-0.121498	0.781839	-0.713039	0.171366
MC58_01270	50S ribosomal protein L19	1	1892	-3.5533	8.20198e-10	0.813195	0.323125	-0.783788	0.0750579	0.0232556	0.985798
MC58_01275	diguanylate cyclase	1	2122	-2.93054	1.46161e-09	0.242559	0.766777	-0.252465	0.663714	0.19698	0.919894
MC58_01280	hypothetical protein	1	2222	-2.52855	5.31919e-07	0.371457	0.693359	0.774666	0.164657	-0.964397	0.246206
MC58_01285	phospho-2-dehydro-3-deoxyheptonate aldolase	3	660	1.58292	1.65017e-07	0.0218067	0.965902	2.87713	9.336e-08	0.83796	0.128513
MC58_01290	chorismate mutase	3	702	0.577465	0.00962352	0.0553272	0.910218	1.2718	0.000976253	0.62897	0.336689
MC58_01295	gluconolactonase	4	75	3.35528	1.01864e-13	-0.578837	0.102532	0.143267	0.751445	0.275388	0.797342
MC58_01300	chorismate mutase	1	1707	-1.98626	1.1323e-07	0.713586	0.170982	0.412127	0.32413	0.297137	0.820069
MC58_01305	translation inhibitor protein RaiA	1	1271	-2.56165	1.53019e-12	1.10024	0.000248735	-2.77499	3.57922e-11	0.330578	0.374964
MC58_01310	membrane biogenesis protein	1	1603	-1.39326	3.10653e-07	0.383128	0.276871	0.292376	0.53439	0.0294336	0.98353
MC58_01350	cytoplasmic protein	3	389	1.99775	2.13267e-07	-0.704764	0.170982	-0.668238	0.136358	0.203358	0.90904
MC58_01375	DTW domain-containing protein YfiP	1	2430	-1.8789	5.14208e-06	0.651159	0.358949	-0.0138943	0.984856	0.608104	0.661901
MC58_01380	thioredoxin 2	4	215	0.731158	0.00826696	2.26121	2.97945e-08	0.80074	0.101108	1.63734	0.00512959
MC58_01385	methyltransferase	3	1056	-1.0353	1.4584e-05	-0.289132	0.467839	0.753592	0.0196533	-0.472759	0.522926
MC58_01390	uracil-DNA glycosylase	3	403	1.13808	3.27546e-05	-0.185995	0.708253	0.194186	0.707506	0.581698	0.575136
MC58_01395	autonomous glycyl radical cofactor GrcA	1	1177	-6.27638	1.39245e-17	0.468383	0.493736	-3.69248	3.73391e-08	0.555226	0.665044
MC58_01400	amino acid transporter	1	1427	-1.1685	0.0444334	0.848429	0.406017	0.24269	0.645945	0.486905	0.583314
MC58_01405	LysR family transcriptional regulator	1	1372	-1.15806	0.000409258	1.16251	0.016553	0.0727116	0.893956	1.46548	0.0169192
MC58_01410	ATP-dependent RNA helicase SrmB	1	1781	-2.17845	3.36875e-09	0.178788	0.756237	1.04794	0.0055676	0.275961	0.824611
MC58_01415	tRNA (adenine-N6)-methyltransferase	1	1626	-1.18588	0.000269906	0.112972	0.87904	0.834326	0.0805782	0.122086	0.945084
MC58_01420	L-aspartate oxidase	3	680	1.05019	0.00862344	0.274339	0.71842	1.41021	0.000597645	0.532483	0.486677
MC58_01425	RNA polymerase sigma factor RpoE	3	595	1.75225	3.63382e-09	0.562181	0.075548	-0.158808	0.514057	0.675329	0.00967868
MC58_01430	anti-RNA polymerase sigma factor SigE	3	593	1.32754	1.65518e-07	0.584907	0.0405131	-0.114947	0.789247	0.60404	0.214409
MC58_01445	elongation factor 4	1	1638	-1.55456	1.42566e-07	0.0721764	0.880106	0.446182	0.341669	-0.157797	0.918471
MC58_01450	signal peptidase I	1	2806	-1.74944	7.34807e-08	-0.00448701	0.994688	0.0129148	0.982987	-0.296323	0.850897
MC58_01470	pyridoxine 5'-phosphate synthase	1	1463	-1.18544	5.3191e-05	-0.0281416	0.965902	0.0377001	0.937225	0.314217	0.775675
MC58_01480	ferredoxin	3	888	-0.615973	0.113683	0.693524	0.329026	2.67725	6.34758e-06	-0.0440988	0.980579
MC58_01485	transcriptional regulator	3	497	-2.04478	0.000752962	-3.29215	0.00447962	-0.151637	0.84846	-1.20773	0.162337
MC58_01490	permease	1	2812	-1.86512	0.00297922	0.254468	0.846394	0.196209	0.858363	-0.379835	0.866441
MC58_01505	N-acetylmuramic acid-6-phosphate etherase	1	1409	-1.0137	9.67475e-05	0.300519	0.534572	-0.0528854	0.949588	0.50447	0.828078
MC58_01510	PTS sugar transporter subunit IIC	3	410	1.38333	7.6278e-06	-0.433076	0.376839	0.529593	0.336772	0.0408506	0.98353
MC58_01515	hypothetical protein	3	615	2.63469	2.22961e-11	-0.661261	0.0888917	0.364004	0.508164	-0.0661236	0.974428
MC58_01525	lytic murein transglycosylase	3	1096	-1.50301	0.000139014	0.469654	0.534572	0.539625	0.11144	-0.392805	0.669503
MC58_01530	hypothetical protein	3	631	2.21074	0.000252983	-0.133657	0.905645	0.99652	0.0598062	-0.2974	0.847267
MC58_01535	phosphoribosylformylglycinamidine synthase	1	1872	-3.61403	8.52697e-15	0.731561	0.0598653	1.21491	0.012268	-0.196992	0.918471
MC58_01545	membrane protein	1	1644	-1.20558	8.69209e-07	0.253899	0.506252	0.322305	0.432235	-0.196882	0.889844
MC58_01550	response regulator GlrR	1	2666	-1.90466	6.48228e-10	0.19502	0.651554	-0.298584	0.422947	-0.346535	0.714759
MC58_01555	nitrogen regulatory protein P-II 1	1	1588	-1.18994	3.36633e-05	0.586542	0.220662	0.315043	0.500927	0.0474597	0.979444
MC58_01560	peptide permease	3	848	0.0423193	0.900621	-0.427686	0.546788	2.21749	0.0056642	-0.363238	0.895265
MC58_01570	lysine/cadaverine antiporter	1	2150	-1.90833	1.27112e-06	-0.48478	0.366078	1.28899	0.371116	0.498393	0.918471
MC58_01580	dihydropteridine reductase	2	250	-1.34272	0.00063838	2.28991	2.9814e-05	0.525463	0.393059	2.41001	0.00127484
MC58_01585	serine hydroxymethyltransferase	1	2720	-1.65908	9.4599e-07	0.366382	0.44224	0.195528	0.710515	-0.292799	0.850035
MC58_01590	3-phenylpropionic acid transporter	3	1042	-2.13123	4.06156e-07	0.362581	0.634145	0.904718	0.0390501	-0.467923	0.697187
MC58_01595	stationary phase inducible protein CsiE	4	125	3.6154	3.3227e-16	-0.391207	0.240766	-1.38234	2.01899e-05	-0.443909	0.288843
MC58_01600	membrane protein	1	1466	-1.57809	0.000127193	0.630416	0.39897	0.160128	0.789621	0.366971	0.830527
MC58_01605	nickel transporter	1	1597	-1.27805	0.00277923	0.298721	0.740038	0.13717	0.801326	-0.0964345	0.960135
MC58_01610	sulfite reductase subunit C	3	1018	-1.484	0.00311437	0.111894	0.919277	0.555591	0.306088	-1.17008	0.0684398
MC58_01615	sulfite reductase	1	1570	-1.37085	0.00908103	0.0172385	0.989375	0.118928	0.84846	-0.340247	0.805076
MC58_01630	inositol monophosphatase	2	301	-2.13137	4.76404e-09	0.434236	0.342972	3.96713	1.76567e-08	-0.566407	0.56243
MC58_01635	tRNA (cytidine/uridine-2'-O-)-methyltransferase	1	2541	-1.11887	0.000116381	0.47496	0.351995	-0.368867	0.411171	0.0302454	0.98353
MC58_01640	transcriptional regulator	3	709	0.0215572	0.914679	0.713643	0.00830571	1.63716	6.63958e-06	0.375789	0.456438
MC58_01645	cysteine desulfurase	3	968	-0.92728	0.000682801	0.228783	0.605576	1.20091	0.00140316	0.102635	0.924708
MC58_01650	scaffolding protein	1	1483	-1.32676	2.86468e-06	0.521202	0.152578	0.234204	0.546267	0.203133	0.840247
MC58_01655	iron-sulfur cluster assembly protein	3	936	-0.700137	0.00967352	0.487952	0.306111	1.01185	0.0107112	-0.22364	0.878332
MC58_01660	co-chaperone HscB	3	1021	-1.1538	4.99134e-05	0.311847	0.544376	0.557087	0.287615	-0.851068	0.456751
MC58_01665	chaperone protein HscA	1	2213	-1.81118	2.35904e-08	0.151449	0.733654	0.912718	0.0263911	-0.580601	0.472732
MC58_01670	2Fe-2S ferredoxin	3	1082	-1.79379	2.22623e-07	0.082538	0.900574	0.275791	0.578268	-0.554907	0.642832
MC58_01680	aminopeptidase B	1	1635	-1.39806	3.1501e-07	0.178963	0.649992	0.589962	0.16498	-0.2052	0.900117
MC58_01685	enhanced serine sensitivity protein SseB	3	1099	-1.44399	6.94507e-06	0.100045	0.877841	0.490579	0.30976	-0.583934	0.622192
MC58_01700	hypothetical protein	1	2560	-1.39662	4.1574e-08	0.290927	0.372639	-0.26685	0.487041	-0.322581	0.700702
MC58_01705	penicillin-binding protein 1C	1	1790	-1.64005	1.60765e-05	0.908517	0.133032	0.794685	0.0629249	-0.384896	0.774433
MC58_01710	DMSO reductase	3	1080	-1.50898	2.91435e-05	-0.153358	0.846394	0.585203	0.227724	-0.337201	0.832751
MC58_01715	4Fe-4S ferredoxin	1	2785	-2.05295	0.00194138	-0.00523298	0.997596	-0.0242413	0.983522	0.219327	0.925575
MC58_01720	dimethyl sulfoxide reductase	1	2200	-1.92076	0.0140941	0.0885763	0.962861	1.54625	0.0286925	-1.69229	0.0414373
MC58_01725	ferredoxin	1	1145	-3.00841	1.46059e-05	1.02614	0.353504	1.00908	0.143288	-1.00148	0.257864
MC58_01730	nucleoside diphosphate kinase	1	2742	-2.3251	3.02822e-10	0.380401	0.358949	0.0114666	0.982712	-0.570159	0.504724
MC58_01735	ribosomal RNA large subunit methyltransferase N	1	2312	-2.48602	7.38854e-12	0.428089	0.270882	0.336513	0.369248	-0.39718	0.603245
MC58_01750	histidine--tRNA ligase	1	1590	-1.2669	6.52883e-07	0.393335	0.22366	0.258593	0.433161	0.13321	0.898023
MC58_01755	membrane protein	1	2674	-1.64345	1.26416e-09	0.458935	0.148102	-0.114168	0.809361	0.0805787	0.958242
MC58_01760	membrane biogenesis protein	1	1599	-1.45462	6.20174e-06	0.468025	0.377045	0.158268	0.784912	0.101713	0.960135
MC58_01765	GTP-binding protein Der	1	1833	-2.31442	8.65067e-12	0.164133	0.708253	0.423885	0.246812	-0.153466	0.911003
MC58_01775	intimin-like protein SinH	1	2149	-1.75649	0.00284153	-0.735301	0.525973	1.00834	0.0293041	0.604856	0.43331
MC58_01780	membrane protein	1	2608	-1.26266	0.0284544	-0.902854	0.420262	-0.159766	0.777762	0.0348323	0.981717
MC58_01785	membrane protein	3	621	2.56488	3.58003e-12	-0.80739	0.0129114	0.544418	0.204885	-0.292	0.778271
MC58_01790	membrane protein	1	1524	-1.06312	2.58109e-05	0.0898929	0.860333	-0.156603	0.664198	-0.0606352	0.961084
MC58_01805	inosine-5-monophosphate dehydrogenase	1	1931	-2.85067	2.45089e-08	0.656906	0.387286	-0.837384	0.1378	0.194992	0.924887
MC58_01810	GMP synthase	1	1934	-3.00316	6.21743e-13	0.371567	0.459559	-0.925448	0.0216819	0.215112	0.890464
MC58_01820	cytoplasmic protein	3	989	-1.30285	0.0200685	0.258117	0.826554	1.11838	0.0302043	0.0637116	0.973083
MC58_01840	c-di-GMP phosphodiesterase	1	2871	-2.09918	0.000199857	0.734181	0.491777	-0.0607982	0.899354	-0.212331	0.872486
MC58_01845	exopolyphosphatase	1	2495	-2.10525	1.20075e-09	0.0487291	0.930986	-0.823433	0.0179295	-0.589761	0.440625
MC58_01850	polyphosphate kinase	1	2528	-1.06393	2.34113e-06	-0.156423	0.681015	-0.682071	0.0450716	-0.333649	0.713249
MC58_01855	phosphoribosylglycinamide formyltransferase	1	1825	-1.82906	2.04015e-06	0.225736	0.762497	0.558351	0.300968	-0.238139	0.907998
MC58_01860	phosphoribosylaminoimidazole synthetase	3	907	-1.8614	4.33938e-06	0.442973	0.521266	1.63776	0.00450242	-0.479326	0.780213
MC58_01865	uracil phosphoribosyltransferase	1	1758	-2.3991	2.57407e-10	0.232274	0.682127	0.644542	0.0557222	0.127356	0.919894
MC58_01870	uracil transporter	1	1743	-1.88847	4.55099e-07	-0.0938347	0.905645	0.935085	0.0583398	0.194126	0.918471
MC58_01875	DNA replication initiation factor	3	910	-0.882595	0.0431531	0.535243	0.539666	1.43389	0.00367473	0.167449	0.919795
MC58_01890	permase	1	2811	-1.79643	1.59217e-06	0.192259	0.789865	0.127621	0.860654	-0.254753	0.918471
MC58_01915	glycine cleavage system transcriptional repressor	1	1525	-1.00031	8.5643e-05	0.232827	0.612486	-0.304773	0.281533	0.0620159	0.951716
MC58_01920	dihydrodipicolinate synthase	1	1612	-1.05172	2.30286e-05	0.422964	0.206402	0.513067	0.269895	-0.135207	0.924887
MC58_01925	lipoprotein	1	2653	-1.73799	1.92296e-10	0.169177	0.602414	-0.236838	0.476731	-0.288831	0.718609
MC58_01930	phosphoribosylaminoimidazole-succinocarboxamidesynthase	1	1826	-1.91519	8.23461e-07	0.310185	0.664812	0.600598	0.411019	-0.240021	0.919894
MC58_01935	hypothetical protein	3	587	1.87024	7.61388e-10	-0.075976	0.856025	-0.633821	0.0583398	0.313384	0.622109
MC58_01940	methionine tRNA cytidine acetyltransferase	3	720	0.482574	0.0340656	-0.334678	0.44175	1.10011	0.01476	0.0879137	0.961084
MC58_01945	hypothetical protein	3	373	1.98245	2.24528e-07	-0.203554	0.723143	-0.283228	0.392701	-0.020635	0.98353
MC58_01960	multidrug transporter	3	926	-1.52466	3.79941e-06	0.683775	0.186291	0.797119	0.126525	0.375488	0.828078
MC58_01965	nitrate/nitrite sensor protein NarQ	1	2394	-2.45548	4.89255e-06	0.757215	0.421162	-0.918145	0.00963756	0.354392	0.733323
MC58_01970	(Fe-S)-binding protein	1	2305	-2.40363	3.59379e-07	0.29041	0.740131	0.64819	0.29347	-0.355121	0.85138
MC58_01975	beta-lactamase	1	2654	-1.96793	2.43806e-07	0.154213	0.836858	-0.570501	0.341885	-0.126807	0.960099
MC58_01980	GDP-mannose pyrophosphatase	3	1048	-1.74971	2.67717e-06	0.00692803	0.993655	0.803902	0.0786774	-0.750397	0.44608
MC58_01985	hypothetical protein	2	249	-0.586868	0.188088	2.03977	0.00134652	0.4652	0.459567	2.01949	0.00940554
MC58_01990	hypothetical protein	3	659	2.05991	0.000149466	-0.257565	0.781353	2.77239	3.69594e-05	0.890516	0.332795
MC58_01995	transketolase	3	604	2.59986	6.55818e-13	-0.608511	0.0464311	-0.172872	0.73122	-0.14788	0.912195
MC58_02000	transaldolase	4	65	3.02027	3.08822e-12	-0.484461	0.245765	-0.381381	0.136076	-0.0568227	0.942726
MC58_02005	malic enzyme	1	2552	-1.31309	7.11842e-06	0.469275	0.228465	-0.431828	0.261279	-0.104596	0.942167
MC58_02010	carboxysome structural protein EutS	1	1277	-2.82185	2.34918e-06	0.39719	0.72164	-2.60302	1.36357e-05	0.203235	0.911003	Ethanolamine utilization (eut) operon
MC58_02015	ethanolamine utilization protein EutP	1	1279	-3.33844	1.94614e-09	0.697631	0.413906	-2.40086	0.000117577	-0.0414739	0.983332
MC58_02020	ethanolamine utilization protein EutQ	1	1289	-2.36038	3.18614e-06	0.347061	0.72026	-1.5936	0.0170136	-1.12667	0.271232
MC58_02025	ethanolamine utilization cobalaminadenosyltransferase	1	2321	-2.4998	9.38602e-06	0.840983	0.390188	-0.869345	0.313206	-1.40349	0.270429
MC58_02030	phosphotransacetylase	1	1956	-2.5053	1.42329e-07	0.394342	0.649992	-0.351204	0.66693	-1.61914	0.113268
MC58_02035	carboxysome structural protein EutM	1	2529	-1.12659	0.00697834	-0.322808	0.730154	-0.584032	0.360382	-0.47573	0.739606
MC58_02040	ethanolamine utilization protein EutN	1	2355	-2.39274	1.54192e-05	0.541754	0.600048	-1.6102	0.0035456	0.105902	0.949339
MC58_02045	aldehyde dehydrogenase	1	2350	-1.87878	2.86831e-06	0.355722	0.63695	-1.52379	0.0127699	0.528664	0.721909
MC58_02050	ethanolamine utilization protein EutJ	1	2379	-1.99507	1.15266e-05	0.292697	0.746185	-1.22532	0.103	-0.228306	0.922997
MC58_02055	ethanolamine utilization protein EutG	1	1269	-2.12501	8.78645e-05	0.593257	0.567919	-2.25576	0.0282251	-0.0256138	0.99062
MC58_02060	ethanolamine utilization protein EutH	3	634	2.24668	6.32422e-10	-0.29734	0.506252	0.376883	0.398722	0.440766	0.635638
MC58_02080	ethanolamine utilization protein EutL	3	672	1.18477	6.45529e-05	-0.174853	0.743754	1.06554	0.0362433	-0.522339	0.733868
MC58_02090	transcriptional regulator EutR	3	682	1.14188	0.0360186	-0.0545327	0.965657	1.19652	0.0288475	0.404727	0.814209
MC58_02095	hypothetical protein	3	1001	-1.08772	0.0961926	-0.239614	0.867955	1.35745	0.00243075	-1.29412	0.00659565
MC58_02100	coproporphyrinogen III oxidase	1	1615	-1.02058	0.00998944	0.395856	0.634544	0.436694	0.417014	0.194749	0.91898
MC58_02105	N-acetylmuramoyl-l-alanine amidase I	1	1693	-1.53674	3.82866e-06	0.902419	0.0635749	0.359364	0.50872	0.103651	0.960344
MC58_02115	membrane protein	3	728	0.233662	0.528127	-0.0128502	0.988955	1.17288	0.0210842	-0.219289	0.914851
MC58_02125	peroxidase	1	1412	-1.16625	0.00141361	0.370641	0.622634	0.0869678	0.870396	0.40246	0.750642
MC58_02130	short-chain dehydrogenase	1	1919	-2.88842	4.55136e-13	0.213103	0.631888	-1.51843	6.65261e-05	-0.244173	0.836539
MC58_02135	thiosulfate transporter subunit	1	1386	-1.42688	3.30755e-05	0.989732	0.0194979	0.825222	0.074422	0.597493	0.445179
MC58_02140	sulfate/thiosulfate transporter subunit	3	918	-1.27463	7.4134e-05	0.959557	0.0475844	0.71298	0.0451447	0.381642	0.683078
MC58_02145	sulfate/thiosulfate transporter permease subunit	3	922	-1.2528	4.30068e-05	0.713036	0.13094	0.548479	0.133816	0.0740916	0.960135
MC58_02150	sulfate/thiosulfate transporter subunit	1	2872	-2.25259	5.57026e-08	0.854198	0.0847253	0.00381492	0.995405	-0.179672	0.912195
MC58_02155	cysteine synthase	3	1102	-1.39084	2.34695e-06	0.359906	0.461431	0.679855	0.0430507	-0.416941	0.6025
MC58_02180	pyridoxal kinase	1	2119	-2.76355	8.66424e-08	0.23026	0.812937	-0.593372	0.225883	0.150554	0.938376
MC58_02215	sulfate transporter	1	1375	-1.29335	0.000512666	0.811745	0.205599	0.278325	0.723108	1.14544	0.356817
MC58_02230	hypothetical protein	3	703	0.384174	0.434881	0.20606	0.840656	1.22418	0.0160966	0.523397	0.602597
MC58_02235	hypothetical protein	3	712	0.0826185	0.812547	-0.130329	0.870264	1.62264	1.0574e-05	0.237626	0.820874
MC58_02240	LysR family transcriptional regulator	3	472	2.20785	4.62711e-07	-1.05233	0.059907	0.0870948	0.858507	-0.631413	0.510225
MC58_02245	hypothetical protein	3	696	1.09087	0.0261817	-0.217395	0.829838	0.94592	0.0566122	0.0322399	0.98353
MC58_02255	nucleoside permease	1	1304	-2.60519	0.000138896	1.55023	0.158068	-0.413098	0.393573	-0.0437175	0.980579
MC58_02265	transcriptional regulator	1	2640	-1.40773	0.0107836	0.434164	0.682127	-0.573741	0.166263	-0.93475	0.0659987
MC58_02280	tRNA	2	321	1.03577	0.0883451	0.514273	0.633573	3.60793	6.65261e-05	1.60721	0.094849
MC58_02290	glutamyl-tRNA ligase	1	2865	-2.2384	3.83266e-09	0.405902	0.436963	-0.213589	0.589673	-0.133565	0.919065
MC58_02295	hypothetical protein	1	2784	-2.79894	1.42439e-05	-0.349472	0.789449	-0.0333226	0.960359	-0.176008	0.916991
MC58_02300	hypothetical protein	1	2071	-3.25473	5.80514e-10	0.219956	0.801148	0.319889	0.684081	-0.11127	0.96963
MC58_02315	hypothetical protein	1	2657	-1.98041	1.00601e-06	0.198953	0.795995	-0.417188	0.240406	0.0203711	0.985798
MC58_02320	nucleoside permease	1	1280	-3.34087	1.09553e-07	0.482183	0.670058	-2.58877	1.21957e-07	-0.155779	0.918471
MC58_02325	manganese transport protein MntH	3	446	1.16159	7.54854e-05	-0.934492	0.0432412	-2.16503	1.75468e-07	-0.12224	0.918471
MC58_02330	hypothetical protein	4	220	2.28334	3.83266e-09	1.30538	0.000178293	0.87931	0.132276	2.4943	0.000429792
MC58_02335	L-glyceraldehyde 3-phosphate reductase	3	380	1.9644	1.39344e-10	-0.520565	0.12929	-0.18782	0.692198	0.273083	0.838299
MC58_02340	indolepyruvate decarboxylase	4	50	4.14746	6.04904e-17	0.202168	0.610668	-1.01618	0.0446753	-0.0407137	0.980357
MC58_02345	ion channel protein	3	650	1.69742	0.000110805	-0.446255	0.544376	1.07916	0.0448766	-0.29114	0.893076
MC58_02355	glutamate-pyruvate aminotransferase	4	173	3.42748	1.59349e-12	-0.947333	0.0206451	0.892837	0.00147595	1.02737	0.00142001
MC58_02360	lipid A biosynthesis palmitoleoyl acyltransferase	1	1665	-1.58371	1.87736e-06	1.52163	6.89316e-05	0.546335	0.159793	0.19913	0.854901
MC58_02370	hypothetical protein	1	2607	-1.69403	0.00124686	-0.455277	0.672965	0.133484	0.879	0.00276788	0.999047
MC58_02380	hypothetical protein	1	2611	-1.22925	0.033215	-0.697682	0.544376	0.0669637	0.930739	-0.288825	0.850897
MC58_02385	ABC transporter substrate-binding protein	1	2810	-1.68084	3.02576e-06	-0.0875152	0.909762	0.153574	0.839176	-0.308062	0.904179
MC58_02390	histidine kinase	1	1565	-1.51633	2.34823e-05	0.266665	0.70814	0.0626443	0.90073	-0.200684	0.907366
MC58_02395	transcriptional regulator	1	2699	-1.82721	3.13659e-06	0.434174	0.537445	-0.000748046	0.998798	-0.116036	0.931728
MC58_02400	outer membrane protease	1	1559	-1.23861	0.00801588	-0.13442	0.905645	0.136516	0.82549	-0.268184	0.872486
MC58_02405	transposase	2	319	1.63783	0.240154	0.628446	0.807409	3.31524	2.56619e-05	1.07627	0.270237
MC58_02430	membrane protein	4	132	4.24487	6.04904e-17	-0.915652	0.000990741	-0.70181	0.119915	0.999356	0.0837971
MC58_02440	long-chain fatty acid outer membrane transporter	3	447	1.83105	1.01231e-08	-1.15434	0.000372566	-1.62831	5.38513e-06	-0.688209	0.155244
MC58_02445	hypothetical protein	1	2859	-2.17152	9.83088e-07	0.469445	0.55242	-0.354682	0.478332	-0.0360547	0.98353
MC58_02470	SAM-dependent methyltransferase	1	2281	-2.81088	1.49482e-12	0.544874	0.195464	0.827366	0.00681231	0.00261167	0.997394
MC58_02475	chorismate synthase	1	1740	-1.95922	3.46139e-09	0.357812	0.467006	0.0475292	0.921048	0.230825	0.851474
MC58_02480	murein endopeptidase	1	2869	-2.15535	4.88574e-08	0.431205	0.50354	-0.0533833	0.898763	-0.227721	0.850897
MC58_02485	hypothetical protein	1	2058	-3.01422	6.28863e-10	0.437381	0.550897	-0.260463	0.514198	-0.336229	0.777357
MC58_02490	elongation factor P hydroxylase	1	2038	-2.73367	3.85524e-10	0.723844	0.220662	-0.354866	0.477965	0.701925	0.45692
MC58_02500	FAD-dependent oxidoreductase	1	1387	-1.60627	2.18669e-07	0.941329	0.0174609	0.459108	0.160839	0.640455	0.241742
MC58_02505	3-oxoacyl-ACP synthase	1	1389	-1.92212	1.17409e-10	0.927223	0.000671752	0.363088	0.361033	0.743335	0.124518
MC58_02510	membrane protein	1	1361	-3.27769	3.45102e-06	0.789018	0.506252	1.48012	0.0692445	1.00337	0.344592
MC58_02515	periplasmic protein	1	2195	-2.48137	0.00578338	0.597734	0.743754	1.52354	0.0161756	-1.64801	0.0234208
MC58_02530	bacteriophage protein	1	1158	-2.71653	0.000998662	1.41062	0.299971	0.790367	0.0725331	-0.632474	0.250103
MC58_02535	membrane protein	1	1702	-1.94127	8.34355e-09	0.695187	0.134416	0.34081	0.223666	0.171799	0.850897
MC58_02540	flagella biosynthesis regulator	1	1835	-2.07439	6.4682e-08	0.347927	0.572205	0.221621	0.559817	-0.229466	0.847416
MC58_02545	erythronate-4-phosphate dehydrogenase	1	1600	-1.46357	8.27954e-07	0.503206	0.254065	0.216781	0.651127	0.0646831	0.970289
MC58_02550	semialdehyde dehydrogenase	1	1714	-2.07168	1.90617e-09	0.329895	0.512658	0.411329	0.470176	0.700166	0.520823
MC58_02555	tRNA pseudouridine synthase A	1	1687	-1.58881	0.000373556	0.815941	0.299865	0.585061	0.166935	0.426091	0.705709
MC58_02560	hypothetical protein	1	1442	-1.30168	0.0010639	0.667066	0.363462	0.463157	0.427354	0.305284	0.872753
MC58_02570	bifunctional folylpolyglutamate synthase/dihydrofolate synthase	1	2700	-1.89494	2.71277e-08	0.44427	0.339916	0.0608709	0.892136	-0.128209	0.919959
MC58_02575	cell division protein DedD	1	1608	-1.18153	0.00018852	0.399833	0.489238	0.528743	0.391013	-0.0517452	0.982044
MC58_02580	colicin V production protein	3	872	-1.36716	1.52867e-06	0.218792	0.667043	1.86268	9.12667e-05	-0.541436	0.60505
MC58_02585	amidophosphoribosyltransferase	1	1774	-1.95148	3.20903e-08	0.134412	0.808219	0.866494	0.011545	-0.163314	0.90296
MC58_02590	regulatory protein	1	1939	-3.8877	4.85015e-14	0.0792536	0.908562	-0.937872	0.00501219	-0.156373	0.909197
MC58_02595	diaminopimelate decarboxylase	1	1917	-3.16554	2.3097e-10	0.592231	0.409156	-1.72548	0.00227342	-0.317672	0.887261
MC58_02600	amino acid transporter	1	1291	-2.67683	4.51894e-10	-0.0096757	0.991374	-1.44768	8.83331e-05	-0.552674	0.475367
MC58_02605	amino acid racemase	1	2358	-1.98352	1.75216e-05	0.165628	0.870805	-1.71277	0.00118547	-0.258792	0.905721
MC58_02615	3-octaprenyl-4-hydroxybenzoate carboxy-lyase	3	1031	-1.3051	0.000642028	0.13497	0.878453	-0.0401685	0.938812	-0.453157	0.705709
MC58_02620	histidine ABC transporter substrate-binding proteinHisJ	4	136	3.36659	2.24751e-14	-0.476625	0.195464	0.801951	0.00270513	-0.787211	0.011057
MC58_02630	amino acid ABC transporter permease	3	821	0.732726	0.00237532	-0.29792	0.518215	1.25581	0.00372598	-0.784982	0.36985
MC58_02635	amino acid ABC transporter permease	3	822	0.507362	0.0456759	-0.525076	0.29128	1.41061	0.000842351	-0.75118	0.339056
MC58_02640	amino acid transporter	3	819	0.398607	0.0907081	-0.284248	0.563953	1.05432	0.000971872	-0.732482	0.175743
MC58_02645	epimerase	4	96	2.45125	5.38381e-11	-0.0358847	0.938887	0.149035	0.7763	0.29271	0.825883
MC58_02650	glutathione S-transferase	4	114	4.18414	7.52203e-13	0.0126719	0.982433	-0.142173	0.791457	0.382117	0.700306
MC58_02655	glutathione S-transferase	3	557	1.5024	3.81392e-08	-0.0265731	0.95078	0.0767173	0.845641	0.272168	0.727083
MC58_02675	hypothetical protein	4	157	2.58088	0.0009809	0.688259	0.569389	0.556949	0.336011	-0.630161	0.526591
MC58_02680	PTS ascorbate transporter subunit IIA	1	2376	-1.89317	1.19991e-05	0.192126	0.831013	-1.42331	0.00547217	-0.654417	0.560201
MC58_02685	PTS mannitol transporter subunit IIB	1	2372	-1.66647	9.70699e-05	0.434033	0.598254	-1.19317	0.0262039	-0.207128	0.912195
MC58_02690	PTS ascorbate transporter subunit IIC	1	2441	-1.49456	4.62522e-05	0.585441	0.364774	-0.750291	0.126678	-0.0897081	0.966416
MC58_02695	carbohydrate degradation protein	1	2586	-1.62345	9.2764e-05	0.333319	0.696642	-0.650257	0.0741349	-0.380389	0.728937
MC58_02700	transketolase	1	2511	-1.21601	0.00647015	-0.16476	0.879562	-0.702798	0.14273	0.119036	0.949339
MC58_02705	hypothetical protein	1	1148	-3.14483	5.18948e-07	0.968668	0.342082	0.245203	0.740911	-1.41665	0.075822
MC58_02710	phosphate acetyltransferase	1	2671	-1.96962	9.97426e-12	0.318102	0.29128	-0.276286	0.452257	-0.298203	0.74513
MC58_02715	acetate kinase	1	2583	-1.67639	5.75362e-10	0.214458	0.518215	-0.616394	0.131033	0.0685967	0.961084
MC58_02720	hypothetical protein	3	358	1.84351	4.58142e-09	-0.228189	0.595757	-0.727886	0.0648085	-0.0644017	0.969527
MC58_02735	citrate transporter	3	1038	-2.29062	6.16036e-07	0.410816	0.627112	0.705646	0.101108	-0.648382	0.509223
MC58_02745	aminotransferase	1	2311	-2.39374	1.0857e-10	0.533785	0.241441	0.434024	0.207905	-0.619613	0.366928
MC58_02755	transcriptional regulator	1	1749	-2.23452	2.58734e-05	-0.190148	0.871492	0.550274	0.285172	-0.0637249	0.974428
MC58_02770	NADH dehydrogenase	3	1069	-1.26338	1.45532e-06	0.0101615	0.981238	0.432989	0.131762	-0.346501	0.557179	NADH dehydrogenase A/B (NADH A/B) gene cluster
MC58_02775	NADH:ubiquinone oxidoreductase	3	1081	-1.79417	2.42459e-08	-0.0380562	0.935178	0.468737	0.233754	-0.408838	0.618981
MC58_02780	NADH dehydrogenase	3	1094	-1.77282	1.92092e-07	0.172172	0.756237	0.638618	0.0437262	-0.417388	0.597795
MC58_02785	NADH dehydrogenase	1	2797	-2.01524	6.86598e-10	0.0411635	0.926306	0.296567	0.417102	-0.4141	0.618981
MC58_02790	NADH dehydrogenase	3	1095	-1.80951	2.32382e-08	0.0747079	0.877726	0.66048	0.125227	-0.423318	0.705709
MC58_02795	NADH:ubiquinone oxidoreductase	1	2807	-1.77168	1.30716e-08	0.0433926	0.930986	0.0146284	0.982987	-0.390115	0.828078
MC58_02800	NADH dehydrogenase	1	2798	-2.03617	1.52928e-09	0.0351748	0.944245	0.307428	0.569896	-0.514584	0.721892
MC58_02805	NADH:ubiquinone oxidoreductase subunit J	3	1086	-1.79411	4.6398e-08	0.151836	0.766467	0.36613	0.467062	-0.294936	0.85977
MC58_02810	NADH:ubiquinone oxidoreductase subunit K	3	1044	-1.73527	2.30773e-07	-0.107409	0.871503	0.22786	0.728456	-0.792624	0.540646
MC58_02815	NADH:ubiquinone oxidoreductase subunit L	3	1045	-1.8649	1.52702e-09	-0.0301397	0.944245	0.341115	0.48399	-0.82632	0.382019
MC58_02820	NADH:ubiquinone oxidoreductase subunit M	3	1047	-1.89168	2.01095e-09	0.0348487	0.944026	0.545622	0.160658	-0.96604	0.177812
MC58_02825	NADH:ubiquinone oxidoreductase subunit N	3	1020	-1.51541	1.60141e-07	0.1303	0.78507	0.675189	0.160782	-1.02598	0.282267
MC58_02835	chemotaxis protein CheV	1	1260	-0.965877	0.00106474	-0.681661	0.236185	-1.18052	0.0255386	0.261354	0.905441
MC58_02845	acyltransferase	1	1464	-1.16242	0.00639506	-0.126602	0.905645	-0.0437348	0.930967	0.286375	0.828078
MC58_02850	protein ElaB	4	27	3.99244	6.81459e-18	-0.756126	0.0052135	0.254356	0.322454	0.455956	0.150171
MC58_02855	isochorismate synthase	3	619	2.41617	1.12114e-12	-0.910662	0.00145256	0.541466	0.155493	0.13587	0.91898
MC58_02865	2-succinyl-6-hydroxy-2, 4-cyclohexadiene-1-carboxylate synthase	1	2602	-1.1674	2.8195e-05	-0.470058	0.363692	0.475126	0.357317	-0.129007	0.945084
MC58_02870	dihydroxynaphthoic acid synthetase	1	2601	-1.22445	5.38235e-07	-0.376744	0.309002	0.292785	0.528398	-0.0230201	0.985798
MC58_02875	O-succinylbenzoate synthase	3	1077	-1.61411	1.58687e-07	-0.288371	0.600048	0.462063	0.347377	-0.514915	0.708274
MC58_02880	O-succinylbenzoic acid--CoA ligase	3	1075	-1.49021	5.19254e-05	-0.28024	0.708253	0.455244	0.259766	-0.179198	0.912195
MC58_02885	signal transduction protein PmrD	1	2559	-1.38661	0.00442794	0.316987	0.760666	-0.340195	0.481431	-0.257247	0.870073
MC58_02895	4-amino-4-deoxy-L-arabinose-phospho-UDP flippase	1	1531	-1.21626	0.0123875	0.0175489	0.988955	-0.323995	0.519704	0.054068	0.975316
MC58_02900	4-amino-4-deoxy-L-arabinose transferase	1	1718	-2.41244	4.53864e-09	0.257164	0.698459	-0.142646	0.77983	0.23515	0.890464
MC58_02905	4-deoxy-4-formamido-L-arabinose-phospho-UDPdeformylase	1	1765	-1.85386	1.90555e-06	0.529374	0.410467	0.480602	0.477516	0.268241	0.912195
MC58_02910	UDP-4-amino-4-deoxy-L-arabinose formyltransferase	1	2064	-2.92557	2.59993e-12	0.509219	0.201179	-0.0544221	0.899354	-0.0305966	0.982044
MC58_02915	UDP phosphate 4-deoxy-4-formamido-L-arabinosetransferase	1	2079	-2.85612	4.92944e-11	0.577843	0.255467	0.335106	0.469053	0.223026	0.889844
MC58_02920	UDP-4-amino-4-deoxy-L-arabinose-oxoglutarateaminotransferase	1	1782	-2.33636	1.00636e-09	0.459533	0.323759	1.05373	0.000618309	0.291348	0.669665
MC58_02925	heptose kinase	1	2280	-2.64413	1.89274e-10	0.820474	0.0958583	1.00266	0.0187035	-0.0669975	0.970289
MC58_02935	membrane protein	1	1777	-1.76961	0.00094945	0.278644	0.809546	1.03109	0.0987609	-0.194354	0.919894
MC58_02945	IclR family transcriptional regulator	1	2817	-2.45862	5.38235e-07	0.344771	0.70795	-1.01846	0.00390803	-0.614312	0.428673
MC58_02965	deubiquitinase SseL	3	508	1.00912	0.0211226	-1.66428	0.0237156	-0.590922	0.205969	-0.472753	0.728781
MC58_02975	glycerol-3-phosphate dehydrogenase	1	1831	-2.187	1.04575e-07	0.225662	0.767233	0.450257	0.253346	-0.0197	0.986456
MC58_02980	glycerol-3-phosphate dehydrogenase	1	2072	-3.15278	7.88672e-10	0.483019	0.544376	0.427253	0.3668	-0.182834	0.918471
MC58_02985	glycerol-3-phosphate dehydrogenase	1	1454	-1.61068	0.000177277	-0.119799	0.906984	0.266033	0.485224	0.174564	0.900713
MC58_02990	sn-glycerol-3-phosphate transporter	1	2046	-3.51555	3.01969e-13	0.0109918	0.988891	0.245432	0.57941	-0.100088	0.949339
MC58_02995	glycerophosphodiester phosphodiesterase	1	2009	-4.43775	9.37445e-16	0.44609	0.444488	-0.520001	0.17595	-0.199327	0.900117
MC58_03000	transcriptional regulator	1	2486	-2.51884	1.5977e-07	-0.439467	0.602071	-0.605794	0.252795	-0.64574	0.520132
MC58_03005	MFS transporter	3	1049	-1.73282	0.00453887	-0.258349	0.846394	0.842894	0.279642	-0.739935	0.560201
MC58_03010	2Fe-2S ferredoxin	2	330	1.21803	0.0557748	0.0531717	0.967663	3.67158	7.72397e-06	-0.215924	0.918202
MC58_03015	ribonucleotide-diphosphate reductase subunit beta	3	855	-1.12031	2.26367e-05	-0.520441	0.243118	1.73017	0.000133609	-0.465777	0.682049
MC58_03020	ribonucleotide-diphosphate reductase subunit alpha	3	849	-0.0819179	0.722482	-0.428554	0.231446	2.56056	7.36826e-07	-0.44073	0.583873
MC58_03030	regulatory protein	3	517	0.398905	0.261756	-1.442	0.0237156	1.35361	0.0136069	-0.103665	0.960099
MC58_03035	permease	1	1698	-1.90452	0.00979665	0.672306	0.634544	0.579077	0.573539	0.0329904	0.987181
MC58_03040	MR-MLE family protein	3	532	1.09004	0.0145232	-1.28824	0.096858	0.926586	0.0362433	-1.18603	0.0828654
MC58_03045	DNA gyrase subunit A	1	1494	-1.65513	9.19186e-07	0.218952	0.658179	0.262828	0.539656	0.141234	0.91694
MC58_03050	histidine kinase	1	2860	-2.07992	3.57111e-09	0.365822	0.467839	-0.45849	0.208963	-0.0351597	0.98099
MC58_03060	phosphotransfer intermediate protein in two-component regulatory system with RcsBC	1	1431	-0.93663	2.12329e-05	0.57973	0.0333627	0.581214	0.147703	1.00706	0.0381548
MC58_03065	membrane protein	1	1948	-3.0502	1.04665e-15	-0.208461	0.518215	-0.86778	0.0362433	-0.591256	0.387314
MC58_03070	thiamine biosynthesis protein ApbE	1	1493	-1.88783	2.0268e-05	0.08001	0.932466	0.40241	0.311364	-0.0623907	0.970117
MC58_03075	6-O-methylguanine DNA methyltransferase	4	167	2.74971	2.92854e-11	-0.0790301	0.877001	0.675363	0.0985558	0.259917	0.832751
MC58_03080	alpha-ketoglutarate-dependent dioxygenase	3	606	2.5401	1.14451e-09	-0.164676	0.758641	0.242043	0.568476	-0.0574267	0.973573
MC58_03085	multidrug transporter membrane component/ATP-binding component	1	2716	-1.5989	3.41544e-05	0.531595	0.425653	0.196592	0.436298	-0.167972	0.830654
MC58_03090	ecotin	1	1210	-1.48894	1.70054e-05	0.900174	0.0690036	-1.10815	0.0178942	0.159931	0.931938
MC58_03095	ferredoxin	1	1172	-3.15221	3.6516e-07	0.575884	0.592416	-3.74013	1.52386e-05	3.90339	3.19654e-05	Nitrate reductase-cytocrhrome c maturation (nap-ccm) locus
MC58_03105	nitrate reductase	1	1170	-2.81603	5.30886e-06	1.0167	0.320663	0.497098	0.346558	0.126182	0.945084
MC58_03110	quinol dehydrogenase	1	1146	-3.01866	4.04036e-06	0.953613	0.392391	0.600961	0.607357	-1.27145	0.417211
MC58_03115	quinol dehydrogenase	1	2060	-3.16102	4.20689e-07	0.719331	0.512261	-0.164269	0.842422	-0.131674	0.94961
MC58_03120	nitrate reductase	1	2292	-2.73601	5.50622e-08	0.437717	0.608605	0.735211	0.235873	-0.345538	0.824611
MC58_03125	cytochrome C	1	2885	-2.61223	1.41802e-07	0.455524	0.600774	0.136857	0.89112	-0.329888	0.907366
MC58_03175	membrane protein	1	2174	-2.89063	0.000930384	-0.909318	0.632926	1.78102	0.00583042	-2.00328	0.0149888
MC58_03210	membrane protein	1	2649	-1.45765	9.03649e-07	0.237427	0.638158	-0.110372	0.762615	-0.0942016	0.937644
MC58_03220	nucleoid-associated protein NdpA	1	1726	-2.29123	5.74694e-09	0.282373	0.646729	0.241227	0.536836	0.301509	0.774433
MC58_03225	membrane protein	1	2533	-1.31426	2.86966e-05	-0.184349	0.768501	-0.201003	0.567186	-0.242774	0.827278
MC58_03230	50S ribosomal protein L25	1	2861	-2.13814	0.000102356	0.366505	0.740539	-0.380609	0.464236	-0.0443795	0.977441
MC58_03235	hypothetical protein	1	2677	-1.59112	2.73534e-06	0.326743	0.595376	0.163129	0.729982	0.188954	0.911003
MC58_03255	hypothetical protein	3	626	2.52537	2.59848e-11	-0.385998	0.335969	0.920803	0.00824167	-0.251209	0.828705
MC58_03260	microcin ABC transporter ATP-binding protein	1	2496	-2.18624	5.16036e-08	-0.348629	0.621253	-0.891019	0.0152158	-0.405936	0.708274
MC58_03265	microcin ABC transporter permease	1	2477	-1.80972	1.51115e-06	-0.441912	0.534572	-1.01875	0.0583717	0.268513	0.904179
MC58_03270	microcin ABC transporter permease	1	2510	-1.17852	0.00041898	-0.153571	0.840656	-0.559861	0.187572	0.239434	0.88022
MC58_03275	antibiotic ABC transporter substrate-bindingprotein	1	1548	-1.04712	0.00039446	-0.113473	0.863873	-0.189839	0.497883	-0.277971	0.70757
MC58_03290	membrane protein	1	2507	-1.06248	0.000235612	-0.173171	0.780479	-1.00537	0.0516409	-0.0861504	0.970289
MC58_03300	elongation factor P	1	2065	-2.98352	6.21684e-09	0.507902	0.515253	0.0431989	0.941153	-0.0162002	0.990105
MC58_03315	membrane protein	1	1780	-2.03942	0.00105493	0.384287	0.750332	1.41054	0.00986065	0.307211	0.793377
MC58_03320	sugar transporter	2	300	-2.29052	5.41464e-06	1.30072	0.0815966	3.49587	5.38513e-06	-0.763117	0.447442
MC58_03325	bifunctional PTS system fructose-specifictransporter subunit IIA/HPr protein	1	2197	-2.54378	6.19736e-10	0.859886	0.0588803	2.23161	6.19542e-08	-1.33527	0.00114958
MC58_03330	1-phosphofructokinase	1	2187	-2.37548	4.34283e-11	0.353855	0.45451	1.81112	9.12667e-05	-1.16953	0.0914505
MC58_03335	PTS system fructose-specific transporter subunitsIIBC	1	2208	-2.25853	1.3165e-09	0.120701	0.82011	1.43112	0.00098475	-1.03456	0.099929
MC58_03340	endonuclease IV	1	2436	-1.49002	5.66194e-06	0.60186	0.269059	-0.202692	0.648082	0.210179	0.892895
MC58_03345	membrane protein	3	934	-0.632711	0.142837	0.793773	0.311681	1.17897	0.0247727	-0.347725	0.828078
MC58_03360	catecholate siderophore receptor CirA	1	1888	-3.16277	1.21164e-11	1.0995	0.0306841	-1.10133	0.0107311	0.172746	0.918471
MC58_03370	hydrolase	1	1844	-4.38114	4.46235e-05	0.692041	0.745701	-0.996419	0.25325	0.929717	0.550329
MC58_03390	GTP cyclohydrolase	3	768	-0.365806	0.165867	1.08641	0.00696707	0.737483	0.0446437	0.543306	0.43331
MC58_03400	transcriptional regulator	1	2843	-2.23395	1.54326e-09	0.387368	0.479256	-0.56994	0.0967721	-0.426944	0.640386
MC58_03405	sugar ABC transporter substrate-binding protein	1	2323	-0.314162	0.182504	-0.303316	0.442351	-0.517293	0.0524311	-1.00173	0.00703253
MC58_03410	sugar ABC transporter ATP-binding protein	1	2492	-1.74772	1.49871e-09	-0.229865	0.592416	-0.48068	0.0625681	-0.738567	0.0889664
MC58_03415	beta-methylgalactoside transporter permease	1	2340	-1.6255	1.52762e-05	0.127837	0.873546	-0.168502	0.733154	-1.45266	0.0574404
MC58_03420	dihydropyrimidine dehydrogenase	1	2130	-3.02546	1.49969e-09	0.30225	0.718619	-0.757532	0.0677619	-0.190318	0.905721
MC58_03425	dihydropyrimidine dehydrogenase	1	1963	-3.20396	1.64828e-10	0.348122	0.653707	-0.385363	0.627755	-0.904317	0.535113
MC58_03430	hypothetical protein	1	2237	-3.31206	2.7887e-07	1.03313	0.28479	1.3086	0.102304	-0.669052	0.641446
MC58_03455	transcriptional regulator	3	584	1.92391	4.58571e-08	0.106118	0.840699	0.191946	0.687171	0.302513	0.830527
MC58_03460	4-hydroxybenzoate transporter	3	570	1.57729	0.00130943	0.824979	0.248621	0.0762363	0.892452	0.336211	0.824611
MC58_03465	gentisate 1,2-dioxygenase	3	571	1.53839	6.79458e-06	0.960202	0.0151053	-0.198514	0.65733	0.160637	0.918471
MC58_03470	5-carboxymethyl-2-hydroxymuconate isomerase	3	572	1.66591	4.282e-05	0.811527	0.129851	-0.106499	0.845641	-0.0402278	0.982044
MC58_03475	maleylacetoacetate isomerase	3	573	1.35432	0.00318266	0.708929	0.320663	0.268515	0.671979	0.19203	0.925575
MC58_03480	salicylate hydroxylase	3	575	1.03568	0.00192524	0.739083	0.14057	-0.10531	0.860654	0.375544	0.827278
MC58_03485	tRNA-dihydrouridine synthase C	3	827	-0.569842	0.217776	0.798047	0.346031	1.80661	0.00132362	0.120948	0.948218
MC58_03495	oxidoreductase	4	14	3.82054	1.55135e-15	-0.410404	0.274139	-0.0468438	0.907498	0.371049	0.499214
MC58_03500	membrane protein	3	669	1.41716	0.00108778	0.0114235	0.991158	0.781428	0.0140798	-0.18228	0.876296
MC58_03505	membrane protein	4	146	4.09569	2.29827e-12	0.984684	0.00861266	-0.330918	0.41763	0.671554	0.216058
MC58_03515	lactate dehydrogenase	3	647	1.63432	8.79539e-08	-0.723141	0.0320413	0.47797	0.210039	-0.395959	0.621722
MC58_03525	osmoprotectant uptake system substrate-bindingprotein	4	11	4.2421	4.87489e-16	-0.693126	0.0596321	0.122886	0.700971	0.0962453	0.912195
MC58_03530	osmoprotectant uptake system permease	3	620	2.4383	1.38253e-11	-0.801496	0.0154021	0.774019	0.0753233	-0.0159749	0.988655
MC58_03535	ATP-binding protein	3	653	1.53467	1.10421e-06	-0.90705	0.0363261	0.985931	0.0164123	-0.203086	0.904179
MC58_03540	osmoprotectant uptake system permease	3	674	0.912035	0.0035688	-0.623131	0.262568	1.20029	0.00687856	-0.618204	0.533755
MC58_03545	hypothetical protein	3	577	1.38614	3.01762e-07	0.244874	0.531917	0.667326	0.145116	0.124443	0.942167
MC58_03550	MerR family transcriptional regulator	4	6	4.49286	5.68546e-16	-0.603688	0.0598612	-0.473472	0.295032	0.418923	0.65009
MC58_03555	histidine kinase	1	2366	-1.34163	3.08438e-06	-0.0268723	0.965902	-1.18294	0.0005761	-0.37969	0.683078
MC58_03560	two-component response-regulatory protein YehT	1	2818	-2.46298	8.10078e-08	0.356673	0.653844	-0.815885	0.0414855	-0.536381	0.600247
MC58_03575	hypothetical protein	1	1155	-2.60434	0.00153196	1.71975	0.176797	0.252126	0.737034	0.0686516	0.974428
MC58_03580	methionine--tRNA ligase	1	1770	-1.88026	3.31694e-09	0.616159	0.0953351	0.875758	0.00353487	0.302612	0.665044
MC58_03585	antiporter	1	1474	-1.41223	4.84757e-07	0.384167	0.307793	0.0364632	0.936683	0.285153	0.762804
MC58_03590	membrane protein	2	263	-0.981616	0.045151	4.3667	4.96128e-09	2.67377	1.82541e-06	1.89781	0.000524684
MC58_03615	heavy metal resistance protein	3	736	-0.113072	0.688107	1.02515	0.0150054	-0.562864	0.16796	0.999492	0.119152
MC58_03620	hydroxyethylthiazole kinase	3	806	0.636138	0.0765343	-0.361232	0.616346	2.09098	6.66011e-05	0.0643597	0.971463
MC58_03635	sugar kinase	3	948	-1.27518	0.0101172	0.93594	0.287157	1.15005	0.00509747	-0.136196	0.919144
MC58_03645	nucleoside transporter	1	2721	-1.92565	1.72544e-07	0.414225	0.50787	-0.0916901	0.858363	-0.451478	0.710432
MC58_03650	fructose-bisphosphate aldolase	4	94	2.66537	1.55425e-12	-0.251327	0.516334	-0.34107	0.354754	1.18059	0.0042257
MC58_03655	lipid kinase	4	91	3.00194	1.67471e-12	0.478556	0.219176	0.155824	0.7696	0.766457	0.206736
MC58_03660	hypothetical protein	2	341	2.44235	0.00275545	0.325036	0.813567	1.8292	0.00623458	-2.14345	0.0050648
MC58_03675	protease	3	900	-1.99079	4.3523e-06	0.365869	0.65404	2.16228	1.36357e-05	-0.201966	0.900028
MC58_03680	membrane protein	1	2681	-1.73008	0.000241374	0.23856	0.812097	-0.0488564	0.957652	0.0494117	0.98353
MC58_03685	membrane protein	1	2315	-2.44259	5.34127e-05	0.271509	0.821943	0.552466	0.407093	-0.449092	0.752961
MC58_03690	cytoplasmic protein	1	2143	-2.15428	0.000592088	-1.07989	0.364774	1.17292	0.155952	-0.827999	0.512529
MC58_03705	transporter	1	2562	-1.27202	0.000501439	0.0140802	0.987667	-0.501282	0.580624	-0.208857	0.945084
MC58_03710	multidrug transporter	1	2573	-1.54238	7.11842e-06	0.370896	0.560925	-0.482821	0.407983	0.371754	0.847416
MC58_03725	chaperone	3	898	-2.0775	0.000293385	0.958332	0.353993	1.81176	0.000135123	0.225832	0.867704
MC58_03730	3-methyladenine DNA glycosylase	3	629	2.42808	1.01002e-08	-0.196	0.73066	0.944144	0.0268554	0.182508	0.912195
MC58_03735	diguanylate cyclase	1	1194	-0.339289	0.122214	-0.0801958	0.866565	-1.08962	0.000193125	-0.0688282	0.944941
MC58_03740	uridine kinase	3	1007	-1.12687	0.00122203	0.0879862	0.913544	1.24306	0.00118558	-0.541537	0.522102
MC58_03750	assembly protein	1	2678	-1.54393	1.38267e-06	0.406116	0.387286	-0.0218587	0.955748	0.0189019	0.98353
MC58_03760	polysaccharide export protein Wza	4	234	2.95329	1.87472e-05	0.716848	0.435708	2.24153	0.000306138	2.34195	0.000681123	Colanic acid (wca) gene cluster
MC58_03765	protein tyrosine phosphatase	4	235	2.28224	0.000688879	0.345964	0.759484	2.32411	0.000116529	2.49157	0.000248394
MC58_03770	tyrosine protein kinase	4	202	0.579992	0.176061	0.775145	0.29128	1.26593	0.0281	2.26075	0.00161313
MC58_03780	acyl transferase	4	208	0.0850704	0.885548	1.18949	0.202624	0.915224	0.0410897	1.80396	0.00167121
MC58_03785	glycosyl transferase	4	207	0.460524	0.396555	1.19585	0.167309	1.86489	0.000148567	1.9044	0.000754006
MC58_03790	colanic acid biosynthesis protein	4	201	0.734358	0.0490518	0.884313	0.134306	1.33646	0.0989264	2.51467	0.00967868
MC58_03795	colanic acid biosynthesis glycosyl transferase	2	283	-0.525614	0.427074	1.61114	0.134943	2.8685	0.000135643	2.12924	0.00778383
MC58_03800	acyl transferase	2	286	-0.304638	0.557231	1.18566	0.171885	3.48809	0.000912376	1.93439	0.140601
MC58_03805	GDP-mannose 4,6-dehydratase	2	285	-0.451216	0.238562	1.48756	0.0101896	2.83549	0.00526428	1.94047	0.116701
MC58_03810	GDP-fucose synthetase	2	284	-0.660976	0.179161	1.6262	0.0320601	2.94955	0.000119905	2.11809	0.00851381
MC58_03815	GDP-mannose mannosyl hydrolase	2	282	0.11497	0.847	1.59302	0.0643347	3.42618	0.0148683	2.78598	0.186757
MC58_03820	glycosyl transferase	2	291	-0.527594	0.263222	1.34821	0.0749364	2.97512	4.05709e-05	1.31396	0.112117
MC58_03825	mannose-1-phosphate guanyltransferase	2	279	-0.622507	0.115337	1.35216	0.0291561	2.31061	0.00173168	1.79096	0.0414373
MC58_03830	phosphomannomutase	2	290	-0.516589	0.268149	1.31512	0.0863018	2.71818	0.000247024	1.33623	0.145866
MC58_03835	UDP-glucose lipid carrier transferase	2	269	-0.963881	0.0752015	2.15627	0.00611135	2.18903	0.00349964	1.90692	0.0315033
MC58_03840	colanic acid exporter	2	266	-1.21604	0.0288577	2.02902	0.0140123	1.18232	0.0840923	1.7544	0.0504146
MC58_03845	colanic acid biosynthesis protein	2	252	-1.16948	0.0154544	1.42466	0.0650519	0.396946	0.548927	2.28403	0.00342384
MC58_03850	colanic acid biosynthesis glycosyltransferase WcaL	2	256	-2.32852	3.02608e-05	2.55096	0.000561833	0.541028	0.377561	1.61778	0.038045
MC58_03855	colanic acid biosynthesis protein	2	255	-1.84772	0.000430073	2.10434	0.00461152	-0.171887	0.811488	1.53416	0.0849519
MC58_03865	dTDP-glucose 4,6-dehydratase	1	2847	-2.448	7.31851e-11	0.583125	0.170982	-0.388064	0.312128	0.258995	0.819333
MC58_03870	dTDP-4-dehydrorhamnose reductase	1	2093	-2.58575	3.33382e-12	0.520917	0.189903	-0.100348	0.806112	0.150967	0.907998
MC58_03875	glucose-1-phosphate thymidylyltransferase	1	1897	-3.3708	2.25468e-14	0.393664	0.374152	-1.08916	0.00106006	0.164739	0.88801
MC58_03880	dTDP-4-dehydrorhamnose 3,5-epimerase	1	2015	-3.90131	9.74992e-11	0.647129	0.434589	-0.719494	0.027298	0.201394	0.85977
MC58_03885	CDP-6-deoxy-delta-3,4-glucoseen reductase	1	1936	-3.58709	1.14701e-13	0.449228	0.382108	-0.605984	0.0995528	0.17897	0.898378
MC58_03890	glucose-1-phosphate cytidylyltransferase	1	2026	-4.02897	4.87489e-16	0.485527	0.255467	-0.719129	0.0097897	-0.0968429	0.923492
MC58_03895	CDP-glucose 4,6-dehydratase	1	2025	-3.61044	5.45239e-12	0.577825	0.323856	-0.483994	0.193945	-0.261752	0.831387
MC58_03900	lipopolysaccharide biosynthesis protein RfbH	1	1900	-3.65448	3.71296e-14	0.557533	0.170982	-1.08144	0.00143723	-0.157784	0.889844
MC58_03915	transporter	1	1905	-2.72452	2.96827e-05	1.03953	0.314083	-0.627653	0.496123	-0.595103	0.774685
MC58_03925	glycosyl transferase family 1	1	1912	-3.10714	2.32877e-08	0.884996	0.25693	-0.439417	0.189142	-0.500696	0.524886
MC58_03930	rhamnosyltransferase	1	2879	-2.38683	2.81478e-10	0.715567	0.0984236	-0.11056	0.753595	-0.168556	0.889844
MC58_03935	mannose-1-phosphate guanylyltransferase	1	2886	-2.65886	1.38497e-11	0.547125	0.189357	-0.0545352	0.894858	-0.371104	0.68632
MC58_03940	phosphomannomutase	1	2101	-2.52401	3.30494e-09	0.367032	0.55615	-0.156827	0.727947	-0.0986405	0.949339
MC58_03945	UDP-phosphate galactose phosphotransferase	1	1572	-1.31175	2.16172e-05	0.148996	0.789577	0.139763	0.688638	0.0103171	0.990105
MC58_03950	6-phosphogluconate dehydrogenase	1	1618	-1.11366	1.23122e-05	0.173343	0.678761	0.41166	0.3397	0.263445	0.831387
MC58_03955	UDP-glucose 6-dehydrogenase	1	1353	-2.31253	5.69957e-11	0.611065	0.0932351	1.11781	0.0230799	1.66132	0.00707598
MC58_03965	phosphoribosyl-ATP pyrophosphatase	3	1023	-1.41063	6.5309e-05	0.436948	0.512534	0.177473	0.639424	-0.819837	0.182733
MC58_03970	imidazole glycerol phosphate synthase	1	2803	-1.85066	3.92201e-09	0.135714	0.781353	-0.0668822	0.885449	-0.365412	0.733275
MC58_03975	1-(5-phosphoribosyl)-5-[(5-phosphoribosylamino)methylideneamino] imidazole-4-carboxamide isomerase	1	2209	-1.62856	1.10421e-06	0.378515	0.504092	1.07179	0.00938274	-0.732162	0.411495
MC58_03980	imidazole glycerol phosphate synthase	3	1103	-1.48601	1.24767e-05	0.386829	0.526787	0.642003	0.0450716	-0.432488	0.583873
MC58_03985	imidazoleglycerol-phosphate dehydratase	3	995	-1.31874	4.64941e-06	0.143395	0.78883	0.892237	0.0187327	-0.348031	0.76266
MC58_03990	histidinol-phosphate aminotransferase	3	997	-1.42041	5.05711e-05	0.248791	0.699073	0.971507	0.0107311	-0.331456	0.76266
MC58_03995	histidinol dehydrogenase	3	974	-1.55302	9.5823e-07	0.219788	0.696642	1.39679	0.00147358	-0.232106	0.88022
MC58_04000	ATP phosphoribosyltransferase	3	843	-0.482206	0.0448185	0.346387	0.450954	1.78281	0.000310239	-0.230412	0.898378
MC58_04005	hypothetical protein	3	375	1.68689	1.77375e-09	-0.343125	0.280944	-0.291863	0.346558	0.000567034	0.999284
MC58_04010	LysR family transcriptional regulator	3	599	2.79639	1.52928e-11	-0.294014	0.503349	-0.23568	0.546267	-0.135508	0.912195
MC58_04015	putrescine/spermidine ABC transporter	1	2243	-3.67519	3.20339e-14	0.428499	0.407383	0.999736	0.0107311	-0.629042	0.470579
MC58_04020	exonuclease I	1	2551	-1.2502	8.50117e-06	0.362661	0.464049	-0.561028	0.154178	-0.102203	0.945565
MC58_04025	E3 ubiquitin--protein ligase	1	2221	-2.58641	5.07087e-07	0.329446	0.717329	0.913221	0.119915	-1.07942	0.119113
MC58_04030	thiosulfate reductase PhsA	1	1921	-2.66583	1.39e-09	-0.218536	0.770734	-1.39584	0.0240597	-0.0379915	0.985728
MC58_04035	ferredoxin	3	1062	-1.19016	0.0214954	-0.14253	0.907939	0.530635	0.374159	-1.00101	0.258979
MC58_04040	thiosulfate reductase cytochrome B subunit	1	2522	-1.18958	0.00826272	-0.412914	0.680987	-0.360679	0.41763	-0.080188	0.961084
MC58_04045	D-alanyl-D-alanine carboxypeptidase	1	1438	-1.04817	0.00403652	0.58642	0.390188	0.411472	0.279017	0.599005	0.401523
MC58_04050	DNA gyrase inhibitor	3	394	1.4016	3.97012e-06	-0.0238111	0.965657	-1.05792	0.00375897	-0.0114184	0.990105
MC58_04065	GHMP kinase	3	939	-1.18539	0.0139176	0.449526	0.65213	1.61129	0.0274079	-0.21109	0.928057
MC58_04070	acetate kinase	1	2087	-2.56754	1.31851e-09	0.132632	0.861758	0.202318	0.721809	-0.0182056	0.988655
MC58_04075	propanediol utilization protein	1	2007	-4.89602	2.92854e-11	0.257554	0.830472	-0.648822	0.536876	0.0553612	0.98353	Propanediol utilization (pdu) operon
MC58_04080	propanediol utilization protein	1	2008	-4.69017	4.62069e-11	0.00623509	0.996721	-0.611201	0.492284	0.00115393	0.999284
MC58_04085	propanediol utilization protein	1	1860	-4.76355	7.07294e-10	-0.398628	0.759687	0.267353	0.778325	-1.09708	0.357673
MC58_04090	NADH dehydrogenase	1	1843	-4.90711	1.09679e-11	0.522524	0.622634	-1.37207	0.010894	1.4307	0.0336328
MC58_04095	propanediol utilization protein	1	1111	-6.01969	6.05968e-12	1.50342	0.168802	-0.864763	0.241745	-1.32902	0.220271
MC58_04100	aldehyde dehydrogenase	1	2003	-4.95608	4.28958e-12	0.00438972	0.997596	-1.30634	0.216189	-0.682321	0.799082
MC58_04105	ATP:cob(I)alamin adenosyltransferase	1	1847	-5.17728	3.95876e-11	-0.0344268	0.980714	-0.77739	0.260522	0.515483	0.728781
MC58_04115	propanediol utilization protein	1	1105	-5.9841	5.86474e-12	1.47259	0.177076	0.760482	0.347377	-2.52	0.011057
MC58_04120	propanediol utilization protein	1	1850	-5.081	1.43995e-10	0.880507	0.459559	-0.41548	0.64559	-1.41936	0.216435
MC58_04125	microcompartment protein	1	1863	-4.26414	8.30824e-10	0.174029	0.889118	0.628425	0.528398	-0.732477	0.665044
MC58_04130	carboxysome structural protein EutM	1	1176	-4.28048	4.94422e-10	0.184414	0.878453	-2.50858	0.00688032	1.68776	0.150092
MC58_04135	propanediol dehydratase	1	1108	-6.26831	1.09529e-12	1.29264	0.220662	-1.66074	0.0105441	-1.70436	0.0854462
MC58_04140	glycerol dehydratase	1	1846	-5.35243	1.38253e-11	0.201273	0.877841	-0.834691	0.202804	0.812173	0.370581
MC58_04145	propanediol dehydratase	1	1104	-7.86092	2.23164e-09	1.57056	0.43883	-0.0221864	0.984856	-1.26763	0.383863
MC58_04150	propanediol dehydratase	1	1845	-5.74951	4.60712e-12	0.331526	0.789545	-0.786955	0.330671	0.843562	0.513312
MC58_04155	propanediol dehydratase	1	1109	-5.66733	8.01941e-13	0.749311	0.467839	-1.20127	0.0473613	-1.27076	0.146019
MC58_04160	propanediol utilization protein	1	1179	-5.46865	4.35155e-12	1.21098	0.226552	-2.25298	0.00206573	-0.0477005	0.983361
MC58_04165	carboxysome structural protein EutM	1	2006	-4.85963	7.60191e-11	0.276307	0.82259	-0.97904	0.191511	0.348563	0.855782
MC58_04170	glycerol uptake facilitator GlpF	1	2319	-3.15177	1.95392e-06	0.38111	0.766882	-0.767658	0.456997	-1.87127	0.17968
MC58_04175	regulatory protein	1	1964	-3.2125	9.48154e-10	0.306049	0.728708	-0.312052	0.645622	-0.813064	0.45692
MC58_04180	cobyrinic acid a,c-diamide synthase	1	2763	-2.03925	1.25119e-06	0.0482141	0.958527	-0.307888	0.534419	-0.753881	0.447922
MC58_04185	cobalamin biosynthesis protein	1	2796	-2.14783	1.04807e-05	-0.0424956	0.969647	0.256308	0.571656	-0.460698	0.658985
MC58_04190	precorrin-8X methylmutase	1	2163	-2.08471	3.32258e-06	-0.62166	0.478692	0.170299	0.731009	-0.963065	0.154247
MC58_04195	cobalt-precorrin-6A synthase	1	2739	-2.68137	6.6717e-11	0.374833	0.525317	0.380256	0.411426	-1.08873	0.164568
MC58_04200	cobalt-precorrin-6Y C(5)-methyltransferase	1	1959	-3.15777	2.37304e-09	0.522993	0.526787	-0.337878	0.584013	-0.708839	0.604848
MC58_04205	cobalt-precorrin-6Y C(15)-methyltransferase	1	1977	-2.90314	3.44282e-09	0.13408	0.884985	0.0296275	0.970512	-0.904583	0.445179
MC58_04210	cobalt-precorrin-4 C(11)-methyltransferase	1	2045	-3.346	2.31463e-08	0.0178966	0.988955	0.16903	0.74151	-0.336699	0.770629
MC58_04215	cobalamin biosynthesis protein CbiG	1	2779	-2.68552	5.92629e-08	0.0831046	0.930986	0.153429	0.773475	-0.462007	0.702541
MC58_04220	cobalt-precorrin-3B C(17)-methyltransferase	1	1967	-2.80293	4.09254e-09	0.0564054	0.949238	-0.210076	0.75796	-1.11404	0.242076
MC58_04225	cobalt-precorrin-6X reductase	1	2294	-2.77108	1.17718e-11	0.178863	0.762497	0.340304	0.50872	-0.537079	0.682946
MC58_04230	sirohydrochlorin cobaltochelatase	1	1867	-3.42379	1.38253e-11	0.627428	0.332884	-0.0527897	0.940606	-0.991395	0.333769
MC58_04235	cobalt-precorrin-2 C(20)-methyltransferase	1	2247	-2.84049	1.98935e-09	-0.120136	0.89387	0.273842	0.597312	-0.855364	0.250396
MC58_04240	cobalamin biosynthesis protein CbiM	1	1952	-2.82778	4.33552e-10	-0.357023	0.636968	-0.178304	0.75773	-1.39527	0.0522754
MC58_04245	cobalamin biosynthesis protein CbiN	1	2470	-2.25048	0.000948455	-0.0709145	0.965902	-0.526811	0.353761	0.449863	0.721909
MC58_04250	cobalamin biosynthesis protein CbiQ	1	1965	-2.61954	4.11263e-09	0.323008	0.669309	-0.546648	0.36688	-1.05447	0.246206
MC58_04255	cobalt transporter ATP-binding subunit	1	2828	-2.25381	6.00547e-10	0.0562318	0.924325	-0.842194	0.0253229	0.0755133	0.961084
MC58_04260	cobalamin biosynthesis protein CobQ	1	2106	-2.51662	2.71881e-11	0.0951054	0.871632	-0.10828	0.7763	0.0016441	0.998948
MC58_04265	adenosylcobinamide kinase	1	2717	-1.69859	5.79729e-05	0.575019	0.459031	0.292838	0.622464	-0.23217	0.904179
MC58_04270	cobalamin synthase	1	1653	-1.16769	4.80537e-05	0.0798	0.900174	0.62075	0.0916192	-0.167788	0.912195
MC58_04275	nicotinate-nucleotide--dimethylbenzimidazolephosphoribosyltransferase	1	2813	-1.97878	1.67843e-09	0.175115	0.738683	0.16643	0.711911	-0.265836	0.850897
MC58_04280	L,D-transpeptidase	4	80	2.71677	3.9465e-12	-0.562822	0.129851	-0.589518	0.136401	0.126469	0.931728
MC58_04305	hypothetical protein	3	778	0.495207	0.424496	0.767714	0.46721	1.60155	0.00495674	-0.221429	0.897046
MC58_04310	membrane protein	3	1037	-2.23018	3.95724e-05	-0.124982	0.91786	0.767949	0.155019	-0.658697	0.622109
MC58_04315	acyl carrier protein	1	2774	-2.35359	7.5272e-07	0.00724606	0.995089	0.199452	0.697362	-0.190456	0.918471
MC58_04340	tetratricopeptide repeat protein	1	2256	-2.4872	0.000131687	-0.284309	0.833529	0.464903	0.453202	-0.591982	0.583873
MC58_04345	DNA-binding protein	1	1753	-2.29395	0.000479383	0.46573	0.712068	0.651297	0.322111	0.290475	0.844758
MC58_04350	peptidase	2	352	-1.4584	0.000882702	0.249501	0.784769	3.26544	1.04982e-05	-2.37987	0.00386441
MC58_04515	protein MtfA	3	1026	-1.64132	4.04588e-06	0.169464	0.807002	0.181691	0.61466	-0.601876	0.380843
MC58_04555	bifunctional glyoxylate/hydroxypyruvate reductaseA	1	1647	-1.17232	0.000137101	0.164667	0.795995	0.371635	0.414433	-0.297535	0.840247
MC58_04570	membrane protein	1	1534	-1.27315	0.000291793	0.363802	0.603145	-0.231554	0.698697	0.269553	0.899176
MC58_04575	curli production assembly/transport protein CsgG	1	1219	-0.888505	0.00519833	-0.300033	0.671431	-1.78958	6.29735e-06	-1.02068	0.0657529
MC58_04580	curli assembly protein CsgF	1	1222	-1.90959	3.06247e-05	-0.413609	0.667182	-1.96138	1.73603e-07	-1.22234	0.00827916
MC58_04585	curli assembly protein CsgE	1	1223	-1.93574	3.09505e-05	-0.527259	0.563096	-1.85413	1.43318e-06	-1.07033	0.044112
MC58_04590	transcriptional regulator	1	1288	-2.02742	3.0487e-06	0.343026	0.680987	-1.55616	0.000117577	-0.991002	0.0998114
MC58_04595	curlin minor subunit CsgB	3	458	2.80849	1.35903e-09	-0.561225	0.282748	-0.99106	0.000706699	-1.50352	3.19654e-05
MC58_04600	curlin	3	457	2.75322	3.79948e-06	0.00866423	0.993498	-0.644643	0.0325377	-0.968152	0.00906758
MC58_04615	RNase III inhibitor	3	566	1.20166	0.0050064	0.227712	0.77921	-0.346455	0.30839	0.301889	0.747985
MC58_04620	hypothetical protein	3	413	1.4241	4.10774e-07	-0.521426	0.19229	0.138999	0.728252	0.480235	0.481974
MC58_04625	glucans biosynthesis protein	1	1497	-1.61886	2.84361e-07	0.0730042	0.908498	0.239912	0.608522	-0.0108758	0.993048
MC58_04635	glucosyltransferase MdoH	1	2652	-1.65436	2.81106e-07	0.091338	0.865056	-0.248705	0.573539	-0.204487	0.891116
MC58_04645	secY/secA suppressor protein	3	470	2.337	2.81212e-11	-0.749433	0.0183856	-0.234632	0.609471	-0.438528	0.547746
MC58_04650	multidrug transporter	3	565	1.18315	0.000671286	0.394563	0.498579	-0.519693	0.162609	0.493417	0.562508
MC58_04660	sulfurtransferase	1	1507	-1.49406	1.42392e-05	0.395962	0.532137	0.70452	0.0607962	0.166411	0.912195
MC58_04665	hypothetical protein	1	1313	-2.36532	2.22876e-06	2.30034	0.000258794	-1.35102	0.00413728	0.130789	0.944941
MC58_04670	cytochrome B561	1	1298	-1.92576	1.12466e-07	2.20338	1.06634e-06	-0.623611	0.0666855	0.505431	0.478413
MC58_04685	biofilm formation regulatory protein BssS	4	169	3.00049	4.07431e-15	0.0245604	0.948755	0.481701	0.182855	0.680588	0.176667
MC58_04695	dihydroorotase	1	1827	-1.8582	1.3968e-07	0.255928	0.654326	0.419809	0.373534	-0.211679	0.907998
MC58_04700	lipoprotein	1	1188	-0.624154	0.00281103	0.246777	0.464287	-1.48509	5.00264e-05	-0.0327755	0.977331
MC58_04705	glutaredoxin	3	390	2.13867	2.49931e-11	-0.313089	0.352463	-1.66138	1.05217e-06	-0.0352659	0.96963
MC58_04710	multidrug resistance protein MdtH	1	2804	-1.84708	1.7612e-07	0.0897263	0.89909	-0.193012	0.659198	-0.267158	0.847329
MC58_04715	ribosomal-protein-alanine acetyltransferase	1	2550	-1.06645	7.52007e-06	0.434193	0.195464	-0.62995	0.100144	-0.109566	0.941865
MC58_04720	hypothetical protein	1	2539	-1.01613	0.000116999	0.480993	0.276286	-0.269419	0.511084	-0.0834609	0.959917
MC58_04735	flagellar biosynthesis protein FlgN	3	434	1.02786	0.0280318	-0.257268	0.78507	-0.507437	0.478014	-0.482613	0.837307	Flagella formation (flg) operon
MC58_04745	flagellar basal body P-ring biosynthesis proteinFlgA	1	1401	-1.30032	0.0038462	0.114261	0.911236	0.777926	0.176303	0.609645	0.618981
MC58_04750	hypothetical protein	1	1809	-1.88811	8.20502e-06	0.349205	0.675623	0.346675	0.790412	-0.666505	0.790988
MC58_04755	flagellar basal body rod protein FlgC	1	2863	-2.39972	1.46004e-08	0.515588	0.450751	-0.240574	0.74269	-0.0676734	0.974428
MC58_04760	flagellar basal body rod modification protein	1	1713	-2.124	3.82866e-06	0.516613	0.537445	-0.0496133	0.938812	0.933822	0.194954
MC58_04765	flagellar hook protein FlgE	1	2874	-2.3158	1.45018e-08	0.78812	0.164863	0.0538745	0.940806	-0.465784	0.771956
MC58_04770	flagellar basal body rod protein FlgF	1	1142	-2.55412	1.72588e-05	1.49272	0.103648	0.615031	0.504242	-1.97527	0.0720245
MC58_04775	flagellar basal body rod protein FlgG	1	1712	-1.78035	0.000183108	0.43027	0.652781	0.0786377	0.946748	0.838088	0.599097
MC58_04780	flagellar basal body L-ring protein	3	1019	-1.52793	0.00406494	0.180421	0.879574	0.642844	0.336446	-1.0685	0.173228
MC58_04795	flagellar hook protein FlgK	1	2479	-1.60257	6.00836e-07	-0.449644	0.428374	-0.929764	0.119842	-0.281959	0.912195
MC58_04800	flagellar hook protein FlgL	1	1263	-1.48252	0.000103945	-0.560399	0.475081	-1.38301	0.0044649	0.994507	0.229916
MC58_04805	ribonuclease E	1	2884	-2.68296	4.30246e-12	0.335168	0.394896	0.0155672	0.962979	-0.352232	0.44608
MC58_04815	23S rRNA pseudouridylate synthase	3	833	-0.614761	0.0731915	0.547435	0.417992	1.35411	0.00079127	-0.0554728	0.974428
MC58_04820	membrane protein	1	2135	-3.07732	7.50589e-08	0.300314	0.770814	-0.459997	0.171266	-0.366065	0.708274
MC58_04835	hypothetical protein	1	1984	-2.98431	5.58e-15	0.364819	0.243118	0.239277	0.345206	-0.651176	0.0225772
MC58_04840	50S ribosomal protein L32	3	959	-1.32143	0.000156558	0.124983	0.868328	1.70045	0.00196707	0.057696	0.977801
MC58_04845	phosphate acyltransferase	1	1511	-1.42904	1.9284e-07	0.292769	0.473847	0.68112	0.0717523	-0.0240981	0.98353
MC58_04850	3-oxoacyl-ACP synthase	1	1516	-1.7978	3.11847e-09	0.200895	0.633132	0.654705	0.0601038	0.0767035	0.951716
MC58_04855	malonyl CoA-ACP transacylase	1	2086	-2.75351	4.39969e-13	0.326603	0.365768	0.508595	0.343976	0.104835	0.949339
MC58_04870	3-oxoacyl-ACP synthase	3	1084	-1.72843	2.2643e-09	0.253622	0.486846	0.394551	0.344354	-0.385671	0.717321
MC58_04885	thymidylate kinase	1	1537	-1.14437	1.45615e-05	0.260378	0.572992	-0.104241	0.83387	0.0960127	0.949833
MC58_04895	DNAse	3	415	1.41351	1.86267e-07	-0.255159	0.498483	0.159261	0.7766	-0.278369	0.832751
MC58_04905	ferric-rhodotorulic acid transporter	1	2367	-1.76531	0.000113378	0.859864	0.275577	-1.73969	0.000106167	-0.0623562	0.974122
MC58_04910	purine nucleoside phosphoramidase	3	374	1.71906	1.75278e-09	-0.296501	0.373356	-0.285576	0.545889	0.244295	0.848786
MC58_04915	membrane protein	3	426	1.02867	4.58874e-05	-0.342074	0.359859	-0.310726	0.295006	0.145824	0.872486
MC58_04940	NADH dehydrogenase	1	2036	-3.07042	8.4682e-12	0.820249	0.1101	-0.384877	0.283953	0.547703	0.408616
MC58_04945	hypothetical protein	4	244	1.50031	0.00102734	1.67182	0.00184075	-0.92881	0.121465	3.11835	8.90027e-05
MC58_04955	multiple stress resistance protein BhsA	4	242	1.42805	2.6786e-05	3.00478	3.8197e-10	-0.413209	0.31941	1.79576	0.000228318
MC58_04975	lipoprotein ABC transporter ATP-binding protein	1	1517	-1.564	9.54728e-07	0.372889	0.504092	0.656026	0.138046	-0.0470542	0.979444
MC58_04980	outer membrane-specific lipoprotein transportersubunit LolE	1	2826	-2.38673	2.37277e-10	0.167476	0.777198	-0.758872	0.00865398	-0.19282	0.850897
MC58_04985	N-acetylglucosamine kinase	1	2855	-2.46823	1.66743e-08	0.255138	0.730429	-0.367241	0.37607	0.147048	0.919894
MC58_04990	NAD-dependent deacetylase	1	2571	-1.27889	0.000142655	0.312416	0.646445	-0.461063	0.347841	0.135463	0.944941
MC58_04995	spermidine/putrescine ABC transporter substrate-binding protein	1	2694	-1.9742	6.2689e-09	0.311837	0.532289	-0.147783	0.678177	-0.0130975	0.988455
MC58_05000	spermidine/putrescine ABC transporter permease	3	1092	-1.64626	6.7484e-07	0.0802007	0.906984	0.710054	0.0992698	-0.523821	0.646021
MC58_05010	spermidine/putrescine ABC transporter permease	3	543	-2.57125	1.88532e-06	-0.155718	0.895814	0.532638	0.386051	-1.5725	0.0356364
MC58_05015	putrescine/spermidine ABC transporter ATPase	3	973	-1.71531	8.83003e-08	-0.205537	0.724697	1.5321	8.26645e-05	-0.211283	0.866441
MC58_05020	peptidase T	1	2567	-1.36679	3.78677e-07	0.000743937	0.998503	-0.286256	0.490384	-0.148642	0.918471
MC58_05045	adenylosuccinate lyase	1	1865	-3.52648	5.2313e-15	0.298925	0.527485	0.59859	0.152709	-1.11624	0.150092
MC58_05050	lysogenization regulator	1	2186	-2.31861	3.36293e-08	0.278842	0.704119	1.58266	0.00385147	-0.680508	0.583873
MC58_05055	tRNA 2-thiouridylase	1	1786	-1.84043	1.376e-08	0.58614	0.172491	1.29108	0.000117577	-0.185238	0.86166
MC58_05060	phosphatase	1	2799	-1.68057	8.62823e-05	0.0535265	0.956564	-0.108183	0.842112	-0.147965	0.931728
MC58_05065	periplasmic protein	1	2658	-2.01502	4.86949e-05	0.17998	0.869909	-0.453491	0.463441	-0.0692411	0.977331
MC58_05075	isocitrate dehydrogenase	1	2400	-2.29739	1.20287e-11	0.477217	0.148102	-0.716808	0.0905188	0.0281943	0.983361
MC58_05080	bacteriophage protein	3	459	2.89542	2.36657e-10	-1.12912	0.0131911	-0.549167	0.219631	-0.203888	0.910478
MC58_05090	lipoprotein EnvF	1	1128	-3.63367	4.40945e-07	1.242	0.24856	0.992103	0.127025	-0.29263	0.847329
MC58_05100	lipoprotein EnvE	1	2081	-2.69391	3.90362e-07	0.547526	0.563953	0.353507	0.607353	0.131362	0.945084
MC58_05105	cold-shock protein	2	350	-0.810851	0.051368	0.351958	0.694211	4.57619	1.31414e-06	-0.115966	0.9615
MC58_05110	virulence factor	1	1239	0.132359	0.830848	-1.41763	0.189357	-2.46291	7.08557e-06	0.999485	0.0918376
MC58_05120	hypothetical protein	1	1276	-2.94849	1.17327e-06	-1.48194	0.14603	-2.36697	0.000323034	-1.33533	0.145866
MC58_05125	membrane protein	1	1275	-2.54544	3.26729e-07	-1.38193	0.0704514	-3.11842	2.6249e-05	-0.924074	0.540646
MC58_05145	hypothetical protein	1	2524	-1.29381	6.84077e-05	-0.641382	0.304196	-0.618461	0.197978	-0.361469	0.829911
MC58_05150	hypothetical protein	1	2752	-1.72423	0.00109855	-0.0854683	0.941501	-0.0489246	0.936683	-0.576935	0.6025
MC58_05155	hypothetical protein	1	1411	-1.15345	0.00312555	0.420853	0.595671	0.089491	0.872163	0.429397	0.751233
MC58_05160	hypothetical protein	1	2692	-2.00057	5.02288e-06	0.523433	0.512086	-0.123229	0.805106	-0.0693176	0.970289
MC58_05165	heat shick protein	1	1932	-2.83645	1.84092e-08	0.534138	0.51293	-0.886004	0.0333489	0.0526228	0.976717
MC58_05175	BNR/Asp-box repeat domain protein	1	1651	-1.10615	0.0250849	0.0417512	0.96985	0.214209	0.603562	-0.357872	0.748421
MC58_05180	hydrogenase	1	1312	-3.23329	2.35082e-12	2.0598	6.43508e-06	-0.782329	0.106753	0.514974	0.705709
MC58_05185	lipoprotein	1	1950	-3.16587	4.43813e-08	-0.0979325	0.930986	-0.980435	0.0439872	-1.34713	0.0290294
MC58_05190	nickel ABC transporter substrate-binding protein	1	2051	-3.54944	1.46165e-12	0.458256	0.479537	0.0755656	0.86304	-0.0298728	0.983361
MC58_05195	peptide ABC transporter permease	1	2783	-2.71007	1.16141e-07	-0.303674	0.754031	0.0318997	0.963363	0.0826663	0.967435
MC58_05200	peptide ABC transporter permease	1	1798	-2.16677	2.12594e-05	0.672327	0.467006	1.07103	0.0353094	-0.164868	0.918471
MC58_05205	peptide ABC transporter ATP-binding protein	1	2054	-3.79667	4.21668e-11	0.736466	0.35027	0.205463	0.651127	0.0277915	0.98353
MC58_05210	peptide ABC transporter ATP-binding protein	1	1961	-3.01496	8.80101e-06	0.502402	0.689489	-0.370307	0.642405	-1.1308	0.270589
MC58_05215	mechanosensitive ion channel protein MscS	4	62	3.06324	3.82333e-11	-0.471571	0.312673	-0.158788	0.763895	0.0536736	0.976948
MC58_05220	ferredoxin	3	574	1.06374	2.9719e-05	0.711754	0.0232629	0.147351	0.708123	0.026345	0.981717
MC58_05225	tRNA	3	485	1.23179	0.00142876	-0.657995	0.323037	0.137303	0.732428	-0.727864	0.300295
MC58_05230	zinc-binding protein	1	2701	-1.82289	2.43346e-07	0.775636	0.125643	-0.129138	0.730317	-0.448661	0.578726
MC58_05240	regulatory protein	3	474	2.31042	3.21101e-10	-0.692592	0.084024	0.261967	0.393059	-0.707196	0.101378
MC58_05255	chorismate mutase	1	1882	-3.8912	1.01477e-09	0.518156	0.608605	0.673582	0.317728	-0.300151	0.897046
MC58_05260	leucine export protein LeuE	1	2110	-2.66885	2.08261e-11	0.35326	0.506252	-0.416648	0.255718	-0.172668	0.907366
MC58_05265	hypothetical protein	2	289	-0.405107	0.405266	1.76855	0.0129295	2.23214	4.23774e-07	1.15969	0.00851381
MC58_05270	hypothetical protein	1	1311	-3.18021	0.00541355	2.57128	0.153829	-1.39295	0.194619	0.860735	0.723296
MC58_05285	hypothetical protein	4	184	3.14731	7.37728e-10	-0.958008	0.0672081	1.48968	0.000425952	0.48504	0.574515
MC58_05305	membrane protein	4	212	0.482614	0.396555	0.301581	0.784173	1.50397	0.0143438	1.45459	0.0300624
MC58_05310	AraC family transcriptional regulator	3	640	2.05243	2.35831e-06	-0.212624	0.756739	1.04166	0.0202692	0.253227	0.866441
MC58_05315	membrane protein	1	2285	-2.52983	1.12994e-05	0.720278	0.491777	1.18533	0.121616	-0.440863	0.818735
MC58_05320	membrane protein	2	278	-0.638731	0.249769	0.789008	0.425405	1.6641	0.000266418	2.59715	1.21804e-05
MC58_05325	hypothetical protein	1	2782	-2.58249	4.5761e-09	-0.272217	0.720436	0.163549	0.64609	-0.174729	0.889844
MC58_05330	diguanylate cylase	3	1074	-1.48171	3.84954e-07	-0.224023	0.663321	0.425614	0.180418	-0.0806563	0.945565
MC58_05335	hypothetical protein	4	106	4.10576	1.51423e-17	-0.515544	0.0992611	0.0862548	0.7766	-0.363723	0.336689
MC58_05340	serine/threonine protein kinase	4	103	4.16251	1.36815e-17	-0.47582	0.142279	-0.280071	0.244315	-0.267227	0.48824
MC58_05345	MltA-interacting protein MipA	1	2461	-1.8108	2.28663e-10	0.169801	0.622634	-0.148457	0.625361	0.202204	0.77942
MC58_05370	methionine sulfoxide reductase B	1	2548	-1.11227	3.43316e-05	0.274703	0.495852	-0.695678	0.02321	-0.256448	0.752961
MC58_05420	nicotinamidase/pyrazinamidase	1	2709	-1.61786	6.04008e-07	0.357055	0.516334	-0.248384	0.485224	-0.259356	0.824611
MC58_05425	cytoplasmic asparaginase I	1	1594	-1.35112	2.08023e-05	0.298351	0.595671	0.012352	0.977585	0.0616621	0.963898
MC58_05430	protease 4	1	1732	-2.21758	4.13434e-11	0.53708	0.158524	-0.22377	0.640738	0.23646	0.868383
MC58_05440	selenophosphate synthetase	3	741	-0.848504	0.00543927	0.742899	0.148102	0.0307896	0.951537	1.25912	0.0343096
MC58_05445	DNA topoisomerase III	1	1408	-1.02775	6.37728e-05	0.521812	0.18979	-0.180407	0.663714	0.256731	0.828078
MC58_05450	glutamate dehydrogenase	3	811	0.353349	0.163938	0.319822	0.494657	1.80377	1.32346e-05	-0.117768	0.931728
MC58_05455	hypothetical protein	3	371	1.84491	4.94422e-10	-0.150732	0.705733	-0.375525	0.444981	0.0935548	0.960135
MC58_05460	pyrimidine (deoxy)nucleoside triphosphatepyrophosphohydrolase	3	880	-0.701892	0.177156	1.176	0.183108	1.50804	0.0171555	0.191018	0.921564
MC58_05470	acetylornithine aminotransferase	4	55	5.37082	2.78679e-16	0.0695279	0.907939	-0.795747	0.119915	0.344992	0.830654	AST pathway (ast) operon
MC58_05475	arginine succinyltransferase	4	54	5.18758	2.2709e-15	-0.113346	0.853531	-1.67436	5.73355e-05	0.497133	0.547746
MC58_05480	succinylglutamate-semialdehyde dehydrogenase	4	47	4.60612	7.37825e-15	-0.119559	0.840908	-1.9859	2.36676e-06	0.0295307	0.982044
MC58_05485	succinylarginine dihydrolase	4	57	3.63717	2.41183e-11	-0.204043	0.748437	-2.05496	1.84899e-05	0.163034	0.918471
MC58_05490	succinylglutamate desuccinylase	4	58	2.88867	4.11062e-09	-0.370019	0.529272	-1.83051	0.00203725	0.0748669	0.975316
MC58_05495	periplasmic protein	3	748	0.570612	0.0247437	1.63147	5.70998e-06	-1.40756	0.000156339	1.41021	0.000664568
MC58_05505	NAD synthetase	3	377	1.80124	5.271e-09	-0.26995	0.482135	0.133991	0.716055	0.118909	0.912195
MC58_05510	transcriptional regulator	4	67	3.06345	3.11679e-15	-0.675327	0.0149875	-0.459762	0.0751899	0.586571	0.0661908
MC58_05515	PTS system N,N'-diacetylchitobiose-specifictransporter subunit IIB	3	443	0.888238	0.0019668	-1.01221	0.0319514	-1.17139	0.0704549	-0.443718	0.827545
MC58_05525	PTS system N,N'-diacetylchitobiose-specifictransporter subunit IIA	1	2547	-1.27838	1.84232e-06	0.222526	0.629869	-0.654567	0.0825736	-0.0239994	0.98353
MC58_05545	hydroperoxidase	4	64	3.2872	3.70662e-14	-0.728188	0.0304903	-0.367373	0.303392	-0.0383979	0.973573
MC58_05555	L-cystine transporter tcyP	3	990	-1.37182	2.06896e-06	0.100497	0.839186	1.02855	0.00059197	0.0704991	0.944941
MC58_05560	hypothetical protein	3	654	1.72032	0.00116664	0.451253	0.6044	0.749297	0.118374	0.740878	0.380396
MC58_05570	membrane protein	3	386	1.67285	1.16656e-06	-0.694815	0.158524	-0.291497	0.548124	0.27236	0.854901
MC58_05580	hypothetical protein	4	117	3.30625	1.73086e-11	-0.581817	0.206161	-0.750123	0.0684049	0.0351807	0.982044
MC58_05585	6-phosphofructokinase	4	68	3.60694	4.22017e-16	-0.267986	0.461692	-0.241095	0.548588	0.380946	0.563511
MC58_05590	membrane protein	1	1883	-3.84456	3.64991e-13	0.513117	0.420262	0.734889	0.195298	-0.451057	0.810874
MC58_05595	membrane protein	1	2475	-2.10306	0.000370123	-0.835637	0.461692	-0.665129	0.459875	-0.133038	0.961084
MC58_05605	endonuclease	1	1652	-1.23128	0.0270376	0.165232	0.893356	0.600413	0.279607	-0.12908	0.944941
MC58_05615	polymerase	1	2498	-1.82251	7.63012e-06	-0.126531	0.888493	-0.751906	0.311454	-0.310178	0.918471
MC58_05625	threonine--tRNA ligase	1	2103	-2.50346	1.46165e-12	0.302339	0.38639	0.0241582	0.942624	-0.243586	0.647373
MC58_05630	translation initiation factor IF-3	1	2114	-2.69584	2.31501e-13	0.280929	0.424691	-0.226319	0.532627	-0.477749	0.316401
MC58_05635	50S ribosomal protein L35	1	1821	-1.92251	3.06151e-06	0.4301	0.541551	0.333248	0.53005	-0.188445	0.919894
MC58_05640	50S ribosomal protein L20	1	1160	-2.48094	6.47951e-08	1.14258	0.048597	0.420821	0.442991	-0.48192	0.774433
MC58_05645	phenylalanyl-tRNA synthetase	1	1492	-1.8915	3.28424e-05	0.0340055	0.96985	0.385152	0.314044	-0.0191039	0.98643
MC58_05655	integration host factor subunit alpha	3	613	2.48878	1.38253e-11	-0.634654	0.0771897	0.303632	0.561462	0.159511	0.924887
MC58_05660	vtamin B12-transporter permease	1	1486	-1.68602	1.09831e-07	0.38142	0.467006	0.32009	0.520394	-0.120532	0.945084
MC58_05665	glutathione peroxidase	4	100	2.67431	8.80616e-15	-0.388982	0.165652	0.0350654	0.946748	0.671369	0.29699
MC58_05670	vitamin B12-transporter ATPase	3	617	2.33752	3.08397e-10	-0.537387	0.194162	0.467401	0.199842	0.294736	0.775675
MC58_05680	cyclic di-GMP regulator CdgR	4	101	2.68281	1.07242e-11	-0.408243	0.305274	-0.128135	0.852168	0.384454	0.828078
MC58_05685	hypothetical protein	3	605	2.47874	3.18084e-13	-0.218681	0.514125	0.011399	0.975738	0.0229623	0.980579
MC58_05700	PEP synthetase regulatory protein	3	427	1.03259	0.000101175	-0.483054	0.274139	-0.217738	0.514345	0.214778	0.828078
MC58_05705	phosphoenolpyruvate synthase	1	1249	-0.666721	0.000962725	0.427729	0.137701	-0.768835	0.00998753	1.03553	0.0031111
MC58_05720	oxidoreductase	1	1761	-2.07212	0.00280493	0.790271	0.544376	0.707808	0.242214	0.264502	0.898023
MC58_05730	electron transfer flavoprotein	1	1391	-1.89115	0.00203026	0.953765	0.353993	0.746745	0.198646	0.623721	0.509223
MC58_05735	AraC family transcriptional regulator	1	1852	-4.08255	4.07338e-06	1.16141	0.431078	-0.920312	0.183904	-1.22115	0.242076
MC58_05745	acetate CoA-transferase YdiF	3	897	-1.95897	8.10253e-05	1.00899	0.204562	1.73794	0.00237769	0.278561	0.847329
MC58_05750	3-dehydroquinate dehydratase	3	996	-1.36874	7.76286e-06	0.261249	0.655617	0.871808	0.0901986	-0.293914	0.872486
MC58_05755	shikimate dehydrogenase	1	1760	-2.34795	1.45495e-05	0.120245	0.916348	0.875084	0.0240678	-0.0104208	0.991668
MC58_05775	hypothetical protein	3	558	1.44506	5.35979e-06	0.020989	0.96985	0.0372216	0.930967	0.027681	0.982874
MC58_05780	membrane protein	1	2727	-1.71726	4.52285e-07	0.256852	0.624386	-0.0316775	0.945853	-0.216768	0.872486
MC58_05785	thioesterase	1	2402	-2.39644	2.98793e-06	0.552793	0.552405	-0.891652	0.0906106	-0.0376818	0.98353
MC58_05790	hypothetical protein	3	841	-0.468282	0.167439	0.488553	0.467006	1.67602	0.00010357	-0.0696057	0.964501
MC58_05795	L-cystine transporter tcyP	1	2123	-2.86451	9.8754e-12	0.0372699	0.958212	-0.0548118	0.941153	0.120247	0.960344
MC58_05800	iron-sulfur cluster assembly scaffold protein	4	142	3.46517	1.94814e-11	1.16658	0.0016535	0.0615974	0.930739	0.986206	0.204571	Sulfur formation system (suf) operon
MC58_05805	cysteine desulfurase	4	143	3.09598	7.11921e-12	0.968209	0.0138924	-0.0262084	0.945147	0.702388	0.0628376
MC58_05810	cysteine desulfurase	4	153	2.32822	8.04111e-09	0.976992	0.0191283	0.153476	0.695576	0.595495	0.207182
MC58_05815	cysteine desulfurase	4	150	2.18337	2.60738e-10	0.918904	0.00469699	-0.0569381	0.906276	0.608967	0.250212
MC58_05820	cysteine sulfinate desulfinase	4	151	2.09969	1.46656e-10	0.875202	0.00401448	-0.062823	0.865627	0.604756	0.117192
MC58_05825	cysteine desufuration protein SufE	3	569	1.58951	5.60706e-07	0.762008	0.0360149	0.0324563	0.949898	0.44551	0.659809
MC58_05830	murein L,D-transpeptidase	4	69	3.50783	5.57814e-17	-0.12236	0.723732	-0.230733	0.695576	0.328037	0.802943
MC58_05835	Major outer membrane lipoprotein 2	1	2389	-1.75975	3.47049e-05	0.163249	0.861649	-1.19205	0.00940488	1.05045	0.162104
MC58_05850	amino acid permease	1	1695	-1.70166	0.00205337	0.737785	0.479096	0.545226	0.201903	0.121289	0.931613	Salmonella pathogenicity island-2 (SPI-2)
MC58_05855	hydrolase	1	1842	-5.35861	1.09129e-05	1.69379	0.409608	0.500622	0.376126	0.632944	0.385076
MC58_05860	cytoplasmic protein	3	550	-1.90247	0.00183766	-0.350803	0.77921	0.0986681	0.874136	-1.81349	0.00518957
MC58_05865	regulatory protein	1	1886	-3.26131	1.04421e-08	1.26249	0.0971126	-1.67575	0.0167591	-0.239459	0.918471
MC58_05870	tetrathionate reductase subunit A	1	2352	-2.241	2.14262e-06	-0.0365755	0.96985	-1.41955	0.00504171	0.0538656	0.980579
MC58_05875	tetrathionate reductase subunit C	1	1274	-2.16457	0.000683394	-0.786767	0.535445	-2.71824	0.000502407	-1.26476	0.311681
MC58_05880	tetrathionate reductase subunit B	1	2033	-3.34896	0.00034876	0.560163	0.766777	-0.781426	0.0687371	0.701872	0.206267
MC58_05885	histidine kinase	1	2838	-2.1634	1.70203e-09	0.618763	0.197073	-0.49249	0.160326	-0.328073	0.772879
MC58_05890	tetrathionate response regulatory protein TtrR	1	2642	-1.56589	0.00138107	0.450013	0.653706	-0.366742	0.438105	-0.643919	0.445179
MC58_05900	membrane protein	4	148	3.47453	2.33195e-17	0.601325	0.0173302	0.759919	0.00192516	0.981265	0.000596227
MC58_05910	histidine kinase	1	2520	-1.48374	0.00019334	-0.352219	0.676672	-0.263078	0.614053	0.114908	0.949339
MC58_05930	type III secretion system protein SsaD	1	2481	-1.7033	0.00081866	-1.12153	0.220662	-0.945529	0.0264449	-0.423496	0.729544
MC58_05935	type III secretion system chaperone SsaE	1	1326	-2.0449	0.021722	2.26404	0.0953351	-1.6055	0.0151832	2.52632	0.000402985
MC58_05940	type III secretion system chaperone SseA	1	2609	-1.48373	0.00919082	-0.758639	0.497117	0.198146	0.613717	-0.0947443	0.945084
MC58_05945	pathogenicity island 2 effector protein SseB	1	2161	-2.46538	3.97591e-06	-0.780167	0.408303	0.356769	0.348947	-0.403198	0.697187
MC58_05950	pathogenicity island 2 chaperone protein SscA	1	1829	-1.84615	0.00129548	0.322931	0.78231	0.469735	0.264039	-0.388176	0.719104
MC58_05955	pathogenicity island 2 effector protein SseC	1	2166	-2.11523	5.92809e-05	-0.537406	0.589282	0.353782	0.415781	-0.290771	0.832751
MC58_05960	pathogenicity island 2 effector protein SseD	3	1078	-1.56437	0.00350951	-0.199027	0.861649	0.655576	0.234298	-0.244472	0.903093
MC58_05970	type III secretion system chaperone protein SscB	3	1010	-1.00406	0.0886043	0.206154	0.869598	1.60411	0.00803595	-0.398221	0.748421
MC58_05985	type III secretion system needle protein SsaG	1	1124	-3.08781	0.00170729	1.5138	0.367954	0.0620493	0.923849	-0.616809	0.560748
MC58_06000	type III secretion system lipoprotein SsaJ	1	1125	-3.31176	1.16657e-07	1.68973	0.0325215	0.330376	0.593056	-0.997621	0.335894
MC58_06005	cytoplasmic protein	3	1052	-2.02987	0.00094206	-0.0894743	0.944245	0.647522	0.114935	-0.71103	0.234669
MC58_06010	type III secretion system protein SsaK	1	2116	-2.86137	0.000231329	0.357343	0.82259	-0.199978	0.686615	-0.208484	0.892895
MC58_06015	type III secretion system protein SsaL	1	2612	-1.46491	0.00245279	-0.526758	0.595376	0.192757	0.70578	-0.218084	0.904179
MC58_06020	type III secretion system protein SsaM	1	2057	-3.05943	0.0013563	0.498231	0.800617	-0.0664739	0.940806	-0.426784	0.819333
MC58_06025	secretion system apparatus protein SsaV	1	1951	-2.76125	3.5995e-07	-0.718256	0.450954	-0.687263	0.101108	-0.932905	0.155244
MC58_06030	type III secretion protein ATPase	1	2484	-2.52658	2.28283e-07	-0.499791	0.591722	-0.121774	0.738093	-0.346145	0.716478
MC58_06035	type III secretion system protein SsaO	3	541	-2.35985	0.00530119	-0.206913	0.914449	0.10693	0.923849	-1.88041	0.0838707
MC58_06045	type III secretion system protein SsaQ	1	2170	-1.75276	0.000349473	-0.835285	0.387834	0.42567	0.282096	-0.388278	0.721892
MC58_06050	type III secretion system protein SsaR	3	1040	-2.0253	0.000361141	0.380643	0.723732	0.671362	0.178602	-0.468797	0.700702
MC58_06060	type III secretion system protein SsaT	1	1851	-4.95041	5.97227e-07	1.26411	0.436117	-0.0701408	0.94217	-1.96025	0.0504146
MC58_06075	tRNA	2	332	2.10674	0.00993369	-0.334254	0.827996	6.37745	4.72083e-06	0.957174	0.660544
MC58_06085	riboflavin synthase subunit alpha	1	2659	-2.08656	9.83935e-09	0.263639	0.664812	-0.229884	0.577353	0.0447144	0.976948
MC58_06090	cyclopropane fatty acyl phospholipid synthase	4	120	3.72793	1.51316e-16	-0.354186	0.292912	-1.11138	0.00189325	0.5833	0.215576
MC58_06100	transcriptional regulator	1	2412	-1.35425	0.0106504	-0.0737292	0.95078	-0.89685	0.0483839	0.26759	0.864828
MC58_06105	transcriptional regulator	1	2225	-2.86394	7.81427e-08	0.665888	0.434589	1.73447	7.63397e-05	-0.322323	0.798398
MC58_06110	superoxide dismutase	1	1715	-2.08921	1.61313e-08	0.196115	0.74633	0.209812	0.806375	0.593922	0.796354
MC58_06120	glutaredoxin	1	1682	-2.3111	1.09871e-10	0.824476	0.0251313	0.318073	0.528398	0.326938	0.828078
MC58_06125	ribonuclease T	3	964	-0.818043	0.0128219	-0.147507	0.850836	1.04401	0.00589392	-0.130617	0.925015
MC58_06130	glyoxalase I	3	636	1.88249	4.84757e-07	-0.485785	0.367432	0.291489	0.582182	0.190661	0.918471
MC58_06135	N-ethylmaleimide reductase	4	221	1.41029	8.29369e-07	-0.211181	0.652781	0.939123	0.0430507	2.33835	0.000164276
MC58_06140	transcriptional repressor NemR	4	160	2.60587	2.53514e-10	0.228993	0.627219	0.151164	0.751429	2.30403	8.57359e-05
MC58_06145	oxidoreductase	4	26	3.89208	1.30763e-09	-0.431502	0.537445	0.492804	0.274288	0.576492	0.552238
MC58_06155	superoxide dismutase	4	15	3.91959	6.04904e-17	-0.356421	0.296938	-0.0223457	0.950284	0.235564	0.70757
MC58_06160	fusaric acid resistance protein	1	1552	-1.1876	0.00369823	0.178374	0.850639	-0.029824	0.947664	-0.14988	0.918762
MC58_06165	membrane protein	1	2647	-1.49603	0.000270875	0.222719	0.795995	-0.275828	0.673987	-0.00534897	0.997394
MC58_06170	membrane protein	1	1182	-0.733347	0.0618253	0.51867	0.501849	-1.51138	0.000552333	0.425091	0.714759
MC58_06175	transcriptional regulator SlyA	1	2655	-1.92285	1.16138e-07	0.192239	0.752782	-0.434123	0.215084	-0.117393	0.927482
MC58_06185	anhydro-N-acetylmuramic acid kinase	1	1536	-1.19173	1.07646e-05	0.31685	0.511106	-0.0483781	0.93996	0.157773	0.933798
MC58_06190	lysozyme inhibitor	4	211	0.236904	0.600993	0.804876	0.297849	1.27305	0.00201234	1.10794	0.0422331
MC58_06195	pyridoxamine 5'-phosphate oxidase	1	1729	-2.0187	1.82985e-09	0.717723	0.0757541	-0.146412	0.755677	0.331759	0.784365
MC58_06200	tyrosyl-tRNA synthetase	1	1730	-2.09852	1.18234e-09	0.693833	0.065221	-0.120591	0.742322	0.239408	0.800157
MC58_06205	pyridoxamine kinase	1	2876	-2.73377	6.19747e-11	0.56787	0.296125	-0.255414	0.648082	-0.212242	0.918471
MC58_06215	peptide ABC transporter permease	1	2665	-2.2988	1.50335e-09	0.095489	0.857653	-0.24833	0.528526	-0.3005	0.76266
MC58_06220	endonuclease III	1	1150	-3.24188	6.48837e-08	0.951267	0.314806	0.219182	0.694723	-1.00779	0.17968
MC58_06225	elongation factor G	1	2091	-2.71114	4.03327e-10	0.152773	0.830472	0.229958	0.672241	-0.238618	0.906576
MC58_06230	electron transporter RnfG	1	2850	-2.32327	2.759e-08	0.387813	0.581676	-0.250518	0.672241	0.148128	0.944941
MC58_06235	electron transporter RnfD	1	1955	-2.86839	2.21318e-09	0.157413	0.857653	0.136648	0.810629	-1.48482	0.0384302
MC58_06240	electron transporter RnfC	1	2287	-2.59361	7.10715e-10	0.472355	0.420363	1.02155	0.0142314	-0.39114	0.766295
MC58_06245	electron transporter RnfB	3	956	-1.40158	0.000235969	0.620089	0.363692	1.19613	0.0243658	-0.737904	0.475367
MC58_06250	electron transporter RsxA	3	1008	-0.80527	0.0382545	0.243092	0.777755	1.62754	0.00162705	-0.71137	0.520132
MC58_06255	membrane protein	3	769	-0.414052	0.33139	0.909628	0.224497	1.04752	0.0183921	0.397277	0.746415
MC58_06260	oriC-binding nucleoid-associated protein	1	2253	-3.00551	1.47289e-09	-0.0895116	0.921546	0.638387	0.139676	-0.327006	0.828078
MC58_06285	hypothetical protein	3	379	2.04438	1.37909e-09	-0.516933	0.160913	-0.30362	0.423209	0.144452	0.89454
MC58_06295	fumarate hydratase	1	2590	-1.71387	7.36731e-08	0.462961	0.230475	-0.667815	0.0906106	-0.0669103	0.963477
MC58_06305	DNA replication terminus site-binding protein	3	473	2.54089	1.57366e-10	-0.6374	0.131203	0.23376	0.545176	-0.678694	0.357235
MC58_06315	amidohydrolase	3	370	2.06345	7.56482e-07	0.149512	0.813567	-0.53157	0.201394	0.262709	0.850897
MC58_06320	porin	1	1849	-4.4848	1.27658e-08	1.94258	0.0585264	-0.72429	0.295521	-1.31204	0.155244
MC58_06330	transcriptional regulator	1	1767	-1.87662	3.47959e-08	0.758844	0.0868614	0.933492	0.0138862	0.172351	0.903153
MC58_06335	membrane protein	3	818	0.340585	0.502668	-0.393667	0.707722	1.67105	0.00233678	-0.573309	0.622192
MC58_06345	hypothetical protein	1	1518	-1.68226	1.02765e-08	0.397972	0.296125	0.677097	0.119915	0.050662	0.976948
MC58_06350	NAD(P) transhydrogenase subunit alpha	1	1585	-1.10363	0.000152698	0.456831	0.330169	-0.000944668	0.998798	0.206005	0.889844
MC58_06355	pyridine nucleotide transhydrogenase	1	2591	-1.66031	2.86401e-08	0.363223	0.398983	-0.540914	0.139172	-0.0483256	0.974428
MC58_06360	pheromone autoinducer 2 transporter	1	2750	-1.7993	1.73363e-07	0.00175735	0.997596	-0.0805155	0.845428	-0.684174	0.32841
MC58_06370	multidrug transporter	3	412	1.40339	0.0186581	-0.70394	0.504661	0.434281	0.593205	0.364302	0.831387
MC58_06375	serine protease	3	475	2.37395	1.06122e-09	-0.895095	0.0353701	0.0955536	0.860654	0.121752	0.945008
MC58_06380	acid shock protein precursor	4	248	1.93911	0.00326311	2.6048	0.00030965	1.83904	0.00922243	4.75495	2.10098e-06
MC58_06385	membrane protein	1	1204	-1.04439	0.000537561	1.36907	0.00151373	-1.96775	0.000117577	0.142966	0.922109
MC58_06395	transcriptional regulator	1	1208	-1.53561	1.61164e-07	0.987408	0.00842276	-1.35699	0.00363529	0.789359	0.376787
MC58_06400	dethiobiotin synthetase	1	1916	-3.29336	9.95037e-10	0.441153	0.607286	-1.54825	0.000116853	0.0511772	0.974428
MC58_06405	voltage-gated chloride channel protein ClcB	3	810	0.542928	0.203447	0.397727	0.634162	1.88576	1.66157e-05	0.270235	0.824611
MC58_06410	glycine/betaine ABC transporter ATP-bindingprotein	4	34	4.4252	3.40164e-16	-0.884605	0.00477735	0.55934	0.295193	0.228996	0.910118
MC58_06415	choline ABC transporter permease	4	35	4.69028	1.69029e-16	-0.83169	0.00630356	1.20337	0.0138862	0.218806	0.909197
MC58_06420	glycine/betaine ABC transporter substrate-bindingprotein	4	195	6.03991	1.75139e-17	-0.697497	0.0220555	1.48187	0.00636669	0.733879	0.481974
MC58_06425	glycine/betaine ABC transporter permease	4	200	7.35917	8.70291e-18	-0.827218	0.00830571	2.05193	8.35338e-05	0.721847	0.387855
MC58_06430	twin-argninine leader-binding protein DmsD	1	2381	-1.96085	3.6409e-07	0.267445	0.709362	-0.928268	0.085123	-0.467002	0.806576
MC58_06435	dimethyl sulfoxide reductase	1	1478	-1.3735	5.98315e-05	0.35463	0.592416	0.182278	0.800795	0.220955	0.922997
MC58_06440	dimethyl sulfoxide reductase	1	2388	-2.44082	5.1714e-05	0.52925	0.649992	-1.31927	0.0704171	0.855641	0.475367
MC58_06445	dimethyl sulfoxide reductase	1	1719	-2.37723	4.13259e-10	0.19	0.757092	-0.313414	0.573539	0.575485	0.641446
MC58_06450	dimethyl sulfoxide reductase	1	2462	-1.87174	4.53041e-09	0.0944621	0.868589	-0.187746	0.688366	0.114822	0.945084
MC58_06455	membrane protein	3	368	2.44925	1.19625e-10	0.201399	0.645624	-0.691617	0.211716	0.116985	0.952931
MC58_06465	spermidine acetyltransferase	1	1581	-1.47979	1.79658e-05	-0.115074	0.879562	0.179981	0.701897	-0.00240815	0.998657
MC58_06470	hypothetical protein	1	1546	-1.25843	4.08132e-05	0.066577	0.914449	-0.122039	0.7763	-0.120908	0.931728
MC58_06480	bifunctional D-altronate/D-mannonate dehydratase	1	1209	-1.52301	0.00772087	0.81245	0.437198	-1.37639	0.0742269	0.0267939	0.987181
MC58_06485	oxidoreductase	1	1663	-1.82374	0.00209449	1.79903	0.0377841	0.107903	0.929955	-0.215921	0.934122
MC58_06495	D-mannonate oxidoreductase	1	1481	-1.41458	0.00406494	0.485809	0.62958	0.411752	0.291663	0.253614	0.838934
MC58_06520	stress-induced bacterial acidophilic repeat motif	4	149	3.65064	4.84209e-17	0.927024	0.000561833	0.444573	0.0989264	1.69965	5.08693e-06
MC58_06525	competence protein ComA	4	130	3.83665	4.69702e-14	-0.122894	0.783088	0.23503	0.528398	1.13604	0.0100878
MC58_06530	hypothetical protein	4	129	3.84244	2.10212e-18	0.1072	0.743235	-0.200284	0.648052	0.950657	0.0411058
MC58_06535	membrane protein	4	56	3.45365	1.12646e-11	0.550734	0.176797	-2.2316	2.85798e-05	0.207205	0.900117
MC58_06550	antibiotic resistance protein MarB	1	1380	-1.69078	0.0120997	1.69858	0.115178	0.118775	0.861199	0.955159	0.22737
MC58_06555	transcriptional regulator	2	270	-1.48496	0.00378982	1.9076	0.0111005	2.24848	8.39498e-05	1.12031	0.112368
MC58_06560	transcriptional regulator	2	288	-1.06098	0.00136195	1.99752	2.63013e-05	3.1826	3.83667e-08	1.23102	0.0119026
MC58_06570	arabinose transporter	3	947	-1.40608	0.00127631	0.902406	0.235306	1.42435	0.00266544	0.133264	0.940709
MC58_06575	LysR family transcriptional regulator	3	655	1.82182	0.00106956	0.49531	0.583342	0.941817	0.0178448	0.725469	0.267875
MC58_06580	succinate dehydrogenase	1	1377	-1.02283	0.0225691	1.24034	0.0921635	0.872758	0.018749	1.57505	0.00150176
MC58_06585	glutaminase	3	944	-1.06784	0.0268754	0.225055	0.837824	1.39288	0.027298	-0.387474	0.832751
MC58_06595	hypothetical protein	1	1983	-2.9639	1.2042e-08	0.523401	0.534572	0.185858	0.708818	-0.615926	0.574314
MC58_06600	membrane protein	3	523	0.333747	0.542566	-0.0302302	0.980454	0.667424	0.396022	-1.88091	0.0355935
MC58_06605	porin	1	2217	-2.02664	0.00109998	0.584474	0.608605	0.92334	0.355176	-1.37981	0.282565
MC58_06615	ATP/GTP-binding protein	1	1459	-1.24447	0.0048674	-0.248086	0.795995	-0.218154	0.7201	0.426804	0.800126
MC58_06620	hydrogenase-1 operon protein HyaF2	1	1416	-1.37323	0.000645929	0.462506	0.556507	-0.402887	0.389508	0.591061	0.562159
MC58_06625	hydrogenase	1	2423	-1.92277	6.83053e-05	0.941463	0.248439	-0.37131	0.295032	0.769536	0.178352
MC58_06630	hydrogenase formation protein	1	1676	-1.9676	2.76017e-06	1.2351	0.0357575	0.182655	0.809648	0.479165	0.824611
MC58_06635	hydrogenase	1	2426	-1.77495	1.12954e-06	0.760015	0.180207	-0.0781349	0.923356	0.845977	0.532502
MC58_06640	Ni/Fe hydrogenase 1 b-type cytochrome subunit	1	2428	-1.83312	0.000102478	0.634054	0.475081	-0.146963	0.816608	0.570829	0.692413
MC58_06645	hydrogenase	3	757	-2.03809	3.73383e-07	1.36796	0.00928465	-0.560534	0.0790694	1.41951	0.00167121
MC58_06650	uptake hydrogenase small subunit	3	756	-1.78179	2.06106e-06	1.72194	0.00042589	-0.77047	0.122776	2.1195	0.00150176
MC58_06655	hydrolase	3	408	1.26332	0.000545151	-0.270275	0.694337	0.475203	0.221202	0.442446	0.623015
MC58_06660	GntR family transcriptional regulator	1	2849	-2.2625	3.38659e-09	0.279988	0.649992	-0.366521	0.39622	0.201978	0.904179
MC58_06665	alcohol dehydrogenase	1	2777	-2.45896	2.42189e-06	-0.128256	0.910218	-0.0592486	0.945147	-0.235769	0.931728
MC58_06670	transporter	1	2042	-3.46859	4.68808e-07	0.312907	0.805098	0.297051	0.74448	0.406823	0.828078
MC58_06675	PhoPQ-regulated protein	1	2325	-1.33057	0.0189191	-0.434676	0.70795	-0.472573	0.362437	-0.808103	0.288843
MC58_06685	hypothetical protein	1	1242	0.198874	0.683375	0.0818829	0.937255	-0.797987	0.0730893	1.51986	0.015702
MC58_06710	acyl carrier protein	1	2171	-3.14194	8.35523e-06	1.15854	0.289144	0.29413	0.532886	-2.45644	5.39298e-05
MC58_06715	hypothetical protein	1	1841	-4.95587	5.82894e-06	1.80165	0.296154	-0.38774	0.692198	0.615735	0.718179
MC58_06720	transcriptional regulator	1	1813	-1.96671	0.000473143	0.657565	0.548034	0.224421	0.663658	-0.69141	0.473584
MC58_06725	sodium:proton antiporter	1	2035	-2.91969	7.91281e-07	0.574678	0.592416	-0.749996	0.0505809	0.788901	0.210056
MC58_06730	aminotransferase	1	2786	-2.0264	1.1164e-05	0.110066	0.911333	0.136066	0.803448	0.180901	0.918471
MC58_06745	malto-oligosyltrehalose trehalohydrolase	3	555	1.43089	7.70086e-08	-0.113222	0.765253	0.0423859	0.942427	0.570271	0.463782
MC58_06760	peroxiredoxin OsmC	4	31	4.20443	1.77078e-18	-0.400413	0.179466	0.427186	0.284083	0.00863081	0.991547
MC58_06765	biofilm-dependent modulation protein	4	196	7.05434	6.9131e-20	-0.846538	0.00334091	0.728095	0.214526	0.922812	0.336342
MC58_06770	30S ribosomal subunit S22	4	3	4.30059	2.59993e-12	-0.174633	0.759687	-0.259656	0.695576	0.298639	0.898023
MC58_06785	formate dehydrogenase	1	1735	-2.002	2.52071e-05	0.619336	0.474377	-0.0676844	0.901491	0.0753954	0.969527
MC58_06790	formate dehydrogenase	1	2085	-2.53363	1.20182e-05	0.306445	0.788449	0.494993	0.435876	0.0904851	0.968417
MC58_06795	formate dehydrogenase	1	2070	-2.95752	7.58359e-07	0.347883	0.766777	0.0779634	0.932522	-0.33225	0.904179
MC58_06800	sulfate ABC transporter substrate-binding protein	1	1171	-2.89997	1.17888e-09	0.890562	0.172351	0.488935	0.347377	0.132648	0.942167
MC58_06805	aromatic amino acid exporter	1	1137	-3.01715	3.82096e-05	2.28892	0.0203827	0.533217	0.56924	-1.75583	0.086507
MC58_06810	porin	1	2005	-4.44976	9.58803e-17	0.344463	0.402909	-1.24013	0.000784419	-0.0298154	0.983332
MC58_06815	aldehyde-activating protein	3	903	-2.27183	3.63983e-05	0.311159	0.77921	1.85481	0.0129494	-0.2209	0.914851
MC58_06820	methyl viologen resistance protein SmvA	3	832	-0.694211	0.00414156	0.327917	0.467839	1.48471	0.000237726	-0.135266	0.922997
MC58_06825	TetR family transcriptional regulator	3	706	0.445629	0.252095	0.637209	0.355205	1.43512	0.00317287	0.0570041	0.976402
MC58_06830	nitrate/nitrite transporter NarK	4	192	5.45236	9.88865e-17	-1.51368	6.16909e-05	1.37107	0.00174006	-1.03861	0.0480021
MC58_06835	nitrate reductase	4	189	4.50659	9.05288e-18	-1.24179	6.99232e-05	1.66424	1.79949e-06	-0.818592	0.0158042
MC58_06840	nitrate reductase	4	188	4.57479	2.03994e-17	-1.14605	0.000316168	1.7355	4.25067e-06	-0.640548	0.126709
MC58_06845	nitrate reductase	4	191	4.37075	1.57956e-13	-1.03802	0.0111005	2.36236	4.41171e-08	-0.757055	0.112351
MC58_06850	nitrate reductase	4	190	4.9557	9.41976e-16	-1.18294	0.000635704	2.63555	2.80133e-07	-0.781072	0.286514
MC58_06860	N-hydroxyarylamine O-acetyltransferase	1	1696	-2.09417	1.13651e-07	0.806383	0.170982	0.440458	0.329584	-0.12179	0.944941
MC58_06865	effector protein steA	1	1339	-3.04573	2.27091e-09	0.109606	0.908562	-1.71218	0.000620277	1.28473	0.0870727
MC58_06870	L-asparagine permease	1	2291	-2.74163	1.86267e-07	0.468977	0.622634	0.522973	0.343976	-0.478672	0.73811
MC58_06875	lipoprotein	1	2145	-1.68704	0.00307117	-0.423294	0.715789	1.3202	0.0378707	-0.44394	0.751233
MC58_06880	hypothetical protein	1	2357	-2.40847	7.40225e-10	0.363179	0.506252	-1.31039	0.000361658	0.0647408	0.963916
MC58_06895	NADP-dependent oxidoreductase	4	70	3.49518	9.76838e-16	-0.287728	0.425653	-0.0910812	0.724243	0.470099	0.0918376
MC58_06915	ssrAB activated protein	3	977	-1.11521	0.0040454	0.636959	0.374817	0.860626	0.184141	-0.270924	0.889844
MC58_06925	virulence effector SrfC	1	1501	-1.44646	6.70567e-05	0.4502	0.50819	0.417057	0.52399	0.109479	0.963916
MC58_06930	hypothetical protein	3	805	-1.22947	0.0188738	0.262784	0.799272	2.25741	0.00401287	-1.84736	0.0290294
MC58_06935	gamma-aminobutyraldehyde dehydrogenase	3	452	2.84368	1.13666e-12	-0.433117	0.249421	-1.00604	0.0161068	-0.448698	0.554479
MC58_06945	D-alanyl-D-alanine dipeptidase	3	482	1.27117	0.000642852	-0.887737	0.14734	-0.0888933	0.858507	-0.596165	0.503018
MC58_06950	membrane protein	1	2283	-2.97248	0.00051935	0.929094	0.552405	1.03407	0.0678508	-0.520518	0.56746
MC58_06960	effector protein SifB	1	2801	-1.87276	0.0254922	-0.0470964	0.980827	0.0321605	0.960975	-0.133518	0.945084
MC58_06965	hypothetical protein	2	260	-0.971114	0.0794957	3.16668	3.79685e-05	-0.935511	0.0378584	1.97045	0.00150176
MC58_06970	protease	1	1796	-2.32893	6.19963e-09	0.660511	0.239418	0.870122	0.0157147	-0.0135592	0.988655
MC58_06980	benzoate transporter	3	774	1.09455	0.0303473	0.679404	0.428683	2.03044	0.0102731	-0.653392	0.711611
MC58_06990	tellurite resistance protein TehB	1	2464	-1.92258	3.44341e-08	0.440499	0.435708	-0.363235	0.599979	0.187326	0.940975
MC58_06995	potassium-tellurite ethidium and proflavintransporter	1	2776	-2.22602	1.58504e-07	-0.0405949	0.965657	0.242947	0.562392	-0.170866	0.912195
MC58_07000	acetyltransferase	4	71	3.36837	3.62787e-12	-0.0776399	0.88127	-0.0727636	0.899619	0.377315	0.774433
MC58_07005	ribosomal-protein-serine acetyltransferase	3	431	1.13139	0.000107632	-0.238697	0.657656	-0.0689526	0.936683	-0.159534	0.949914
MC58_07010	aminopeptidase	1	1197	-0.328161	0.397657	0.765821	0.275577	-1.03003	0.0110386	-0.976879	0.199649
MC58_07075	hypothetical protein	1	1858	-4.22679	1.76226e-08	0.266635	0.846892	1.39263	0.0289242	-0.682361	0.478413
MC58_07080	glucan biosynthesis protein D	1	1414	-1.54556	1.77909e-08	0.596822	0.0607258	0.0986364	0.850354	0.748376	0.299653
MC58_07090	hypothetical protein	3	391	2.00681	1.43268e-08	-0.193978	0.685444	-1.46719	4.07305e-05	-0.212137	0.844758
MC58_07100	chemotaxis protein	1	2422	-1.85927	0.000163982	0.46392	0.635362	-0.669835	0.638941	0.840549	0.828078
MC58_07110	hypothetical protein	4	209	-0.0333677	0.949136	0.820258	0.368825	1.00846	0.0824484	1.77968	0.015214
MC58_07125	cyanate transporter	2	276	-2.02148	0.0336848	3.11984	0.0211086	2.28519	0.0215575	-0.296746	0.912195
MC58_07130	amino acid-binding protein	3	917	-1.23139	0.00127155	1.1268	0.0637517	0.595894	0.216758	0.112325	0.949914
MC58_07135	polar amino acid ABC transporter ATP-bindingprotein	1	1667	-2.00791	0.000407829	1.21216	0.203232	0.317113	0.501772	0.132382	0.936883
MC58_07140	polar amino acid ABC transporter ATP-bindingprotein	1	1382	-1.70014	0.00708563	1.19185	0.275577	0.238937	0.81038	1.1229	0.44608
MC58_07145	amino acid ABC transporter permease	1	1130	-2.45989	0.00389497	2.50592	0.0353701	1.52334	0.0442276	-0.669258	0.577254
MC58_07160	SAM-dependent methyltransferase	1	1927	-2.95148	5.60244e-10	0.31604	0.676672	-0.962802	0.045214	-0.215243	0.916991
MC58_07165	cytochrome b561	1	2393	-2.14057	7.11055e-09	0.633916	0.218924	-0.88257	0.0650024	0.358543	0.821486
MC58_07170	hypothetical protein	1	2525	-1.48594	2.55854e-05	-0.330693	0.634544	-0.497284	0.247351	-0.388476	0.772553
MC58_07180	FMN-dependent NADH-azoreductase	4	227	1.35436	0.0156706	2.96512	1.01167e-05	1.57229	0.000688749	2.56005	1.92283e-05
MC58_07185	aldehyde-activating protein	3	651	1.38174	0.00175447	-0.697322	0.368273	0.763102	0.0457694	-0.109733	0.944941
MC58_07195	lipoprotein	1	1246	-1.39266	0.00165281	0.517313	0.531667	-0.796508	0.140618	0.822704	0.364807
MC58_07200	hypothetical protein	1	1576	-1.35421	0.000270766	0.0277921	0.97245	0.26805	0.607713	-0.180719	0.919894
MC58_07205	lactate dehydrogenase	3	383	1.88065	5.05078e-09	-0.276665	0.499332	0.0846371	0.847906	0.440282	0.526245
MC58_07210	heat-inducible protein	4	217	1.24336	5.34127e-05	1.28992	0.000372566	0.226022	0.697201	2.18266	0.000973155
MC58_07215	hypothetical protein	3	697	1.03711	0.000736767	-0.450933	0.410467	0.857558	0.0084044	0.182641	0.872488
MC58_07220	reverse transcriptase	3	783	-0.0959653	0.891618	0.48121	0.705525	1.83672	0.00531628	1.32047	0.0773154
MC58_07225	pyruvate-flavodoxin oxidoreductase	3	628	2.37615	1.64671e-12	0.0843071	0.827258	0.694076	0.144199	0.142772	0.91898
MC58_07235	universal stress protein F	1	1212	-1.34557	1.53356e-06	-0.164771	0.695432	-2.36515	1.12012e-06	-0.424885	0.711611
MC58_07250	integrase	1	1347	-2.44953	0.00236889	-1.14019	0.503566	-1.12929	0.116076	2.20973	0.00827916
MC58_07285	bacteriophage protein	2	322	0.588866	0.734395	0.628446	0.852444	3.31524	0.033536	1.07627	0.772018
MC58_07355	tRNA 2-thiocytidine biosynthesis protein TtcA	1	2066	-3.1547	2.92355e-06	0.770132	0.518215	0.305052	0.695576	-0.26285	0.919959
MC58_07360	ATP-dependent RNA helicase DbpA	3	564	1.20571	9.06518e-06	0.337827	0.373337	-0.502333	0.0993005	0.632362	0.106538
MC58_07365	zinc transporter	3	400	1.30856	1.34736e-07	-0.408804	0.249774	-0.852442	0.034592	0.390921	0.721776
MC58_07395	hypothetical protein	1	2438	-1.3283	2.98793e-06	0.481271	0.295107	-0.317541	0.235501	0.217545	0.793377
MC58_07400	mechanosensitive ion channel protein MscS	1	2353	-2.31026	2.66107e-05	0.247799	0.832372	-1.15567	0.0267719	0.343058	0.847329
MC58_07415	hypothetical protein	1	2032	-3.33061	0.000328646	0.738075	0.681015	-0.109262	0.901491	1.13857	0.209919
MC58_07430	membrane protein	1	1840	-4.81167	3.22334e-05	1.46291	0.467839	0.0180113	0.989379	1.69091	0.16044
MC58_07435	invasin	1	1417	-1.27212	0.00812015	0.283646	0.760785	-0.301478	0.659725	0.621946	0.550329
MC58_07440	lipoprotein	3	862	-0.472696	0.426926	-0.607138	0.595671	1.44198	0.01476	-0.205994	0.905941
MC58_07455	hypothetical protein	1	1306	-1.98575	0.000609118	1.27767	0.16764	-0.351248	0.554597	0.768195	0.446755
MC58_07465	oxidoreductase	4	225	1.6446	9.84231e-05	0.779399	0.173921	0.912481	0.0398451	2.95826	4.45525e-06
MC58_07470	aldo/keto reductase	1	2564	-1.28544	8.51443e-05	0.105551	0.882089	-0.555824	0.0617194	-0.239154	0.821486
MC58_07475	transcriptional regulator	3	405	1.28055	0.00161195	-0.138046	0.865056	0.121843	0.868329	0.116685	0.961084
MC58_07490	murein peptide amidase A	3	576	1.47034	6.63507e-06	0.216652	0.681166	0.462324	0.349929	0.285287	0.85977
MC58_07495	L-alanine-DL-glutamate epimerase	3	579	1.68368	4.09666e-08	-0.155887	0.735986	0.619576	0.125792	-0.0272459	0.98353
MC58_07500	peroxidase	1	1604	-1.04165	0.000130195	0.316144	0.449331	0.497627	0.136681	0.072658	0.951716
MC58_07510	hypothetical protein	1	1422	-1.1181	0.00249904	1.11672	0.0531949	0.254691	0.647168	0.764353	0.434764
MC58_07515	hypothetical protein	1	1379	-1.57246	1.99961e-06	1.5853	5.68432e-05	0.301944	0.353761	0.677741	0.161412
MC58_07520	thiosulfate:cyanide sulfurtransferase	1	1300	-2.7083	6.25627e-11	1.98092	3.19486e-06	-0.316537	0.50048	1.05795	0.107495
MC58_07525	phage-shock protein	4	241	1.60046	6.03652e-05	2.89684	4.56774e-09	-0.0957929	0.860654	2.05242	0.000754006	Phage shock protein (psp) operon
MC58_07530	transcriptional regulator	4	240	1.94786	3.27948e-08	3.07049	1.19126e-11	0.132044	0.789247	2.38793	1.98813e-05
MC58_07535	phage shock protein	4	239	2.11683	2.40056e-07	3.07266	2.35681e-10	0.14429	0.797961	2.70331	2.07311e-05
MC58_07540	phage shock protein	4	237	2.3722	2.3972e-10	3.87738	4.76242e-13	0.112397	0.726973	3.24519	1.73656e-10
MC58_07550	peptide ABC transporter substrate-binding protein	3	554	1.33269	4.40945e-07	-0.170611	0.675062	0.087791	0.819927	0.435682	0.471431
MC58_07580	hydrogenase	1	2297	-2.74825	3.32836e-06	0.379938	0.733033	0.308808	0.646352	-0.476003	0.770828
MC58_07590	hypothetical protein	4	183	3.26286	8.78935e-11	-0.446492	0.391115	1.75612	0.003733	0.235286	0.917765
MC58_07600	cytoplasmic protein	3	770	-0.378466	0.207393	1.21734	0.00814981	1.37158	0.00329857	0.79519	0.289857
MC58_07605	exoribonuclease II	3	975	-1.75716	2.68015e-07	0.273995	0.56297	1.60002	1.66157e-05	-0.18553	0.850897
MC58_07610	RNase II stability modulator	3	466	1.698	2.88203e-06	-0.759672	0.159994	0.10247	0.852002	-0.188696	0.918212
MC58_07615	hypothetical protein	3	809	0.508522	0.145874	0.514055	0.420682	1.86181	0.00111797	0.296479	0.866441
MC58_07620	DeoR faimly transcriptional regulator	3	937	-0.872711	0.00210705	0.608428	0.224497	1.04453	0.00210745	-0.130839	0.918471
MC58_07630	translation initiation factor Sui1	1	1169	-2.9429	1.36957e-07	1.05651	0.200398	0.486845	0.244101	0.336398	0.751445
MC58_07635	orotidine 5'-phosphate decarboxylase	1	1762	-1.91303	3.24976e-06	0.534152	0.452676	0.687617	0.0666356	0.25183	0.847329
MC58_07650	phosphatidylglycerophosphatase	3	607	2.71713	4.03692e-12	-0.299949	0.452676	0.233375	0.443897	-0.193491	0.795304
MC58_07655	GTP cyclohydrolase	1	2424	-1.85234	5.9103e-07	0.87535	0.0886929	-0.329402	0.48137	0.628222	0.475367
MC58_07660	aconitate hydratase	4	95	2.52771	3.64418e-12	0.0201515	0.965902	-0.0477635	0.874714	0.39508	0.248817
MC58_07665	hypothetical protein	3	505	-0.732015	0.00503323	-1.12349	0.00477528	-0.963384	0.0192499	-1.08289	0.0892957
MC58_07675	DNA topoisomerase I	3	994	-1.60243	2.11973e-08	0.108123	0.797022	0.859647	0.0255857	-0.219042	0.85977
MC58_07685	peptidase	1	1467	-1.48665	1.33732e-06	0.533247	0.271178	0.226303	0.63144	0.425906	0.700702
MC58_07690	3-oxoacyl-ACP reductase	1	1373	-1.54929	2.67717e-06	1.1235	0.00696707	-0.0104995	0.982987	1.52962	0.00154252
MC58_07695	cob(I)alamin adenolsyltransferase/cobinamide ATP-dependent adenolsyltransferase	1	1423	-1.2331	0.00159431	0.947261	0.154546	-0.106308	0.850309	0.853057	0.305725
MC58_07700	23S rRNA pseudouridylate synthase	3	962	-0.990779	0.000304846	0.0474766	0.932466	1.59193	0.0056543	0.0355348	0.98353
MC58_07715	hypothetical protein	2	317	1.81862	4.00641e-07	-1.65583	0.000323495	4.53736	1.46128e-08	0.769761	0.270589
MC58_07720	glutamine amidotransferase	2	315	0.72552	0.0141186	-1.39888	0.00113932	2.94798	8.50074e-08	0.692671	0.258013
MC58_07725	indole-3-glycerol phosphate synthase	3	714	0.378713	0.0821697	-0.855856	0.00599384	1.13179	0.00926309	0.158972	0.917765
MC58_07735	tryptophan synthase subunit alpha	3	414	1.17524	9.28805e-06	-0.914871	0.0160089	0.329611	0.571485	0.234218	0.911003
MC58_07740	stress-induced bacterial acidophilic repeat motif	4	199	6.98192	6.61453e-22	0.133567	0.743235	1.52396	2.95207e-05	0.734952	0.0651981
MC58_07745	hypothetical protein	4	29	3.89991	2.39138e-14	-0.409866	0.363462	1.04883	0.000543763	0.492433	0.202586
MC58_07750	hypothetical protein	4	166	3.10676	6.55818e-13	-0.144722	0.756238	0.524997	0.0585128	0.333724	0.457177
MC58_07755	Mn-containing catalase	4	102	2.88295	8.79512e-13	-0.0500504	0.914449	0.0711648	0.902318	0.260988	0.829911
MC58_07760	membrane protein	1	1180	-4.57018	4.97124e-17	0.613986	0.19229	-2.61012	1.32346e-05	0.228763	0.912195
MC58_07765	hypothetical protein	1	2593	-1.7365	4.85269e-05	0.315192	0.716212	-0.822782	0.0784783	-0.205609	0.918212
MC58_07770	hypothetical protein	1	1162	-2.5677	1.13077e-10	0.820223	0.0734442	0.0487563	0.927464	0.0480163	0.977146
MC58_07775	intracellular septation protein A	1	2102	-2.50788	6.05567e-09	0.318796	0.65055	-0.102073	0.840056	-0.130876	0.938376
MC58_07780	acyl-CoA esterase	3	913	-1.68364	0.000332871	0.578909	0.518215	1.30332	0.0557204	0.0880943	0.973499
MC58_07785	energy transducer TonB	1	1207	-1.41212	1.06138e-05	1.4371	0.000774894	-1.42503	0.000117577	0.397248	0.622109
MC58_07790	hypothetical protein	1	2431	-1.2449	0.00189618	0.691993	0.349969	-0.648861	0.109017	0.293711	0.832751
MC58_07800	dsDNA-mimic protein	3	921	-1.25817	0.0048674	0.78142	0.345723	0.494129	0.128916	-0.0589147	0.964501
MC58_07820	peptide ABC transporter permease	1	1526	-1.08249	0.00182762	0.244483	0.740131	-0.296798	0.597834	-0.0195394	0.988655
MC58_07830	peptide ABC transporter substrate-binding protein	3	435	1.05958	0.000483094	0.118776	0.822285	-0.672939	0.0537985	-0.39414	0.652789
MC58_07835	hypothetical protein	1	2080	-2.71281	4.46182e-08	0.572665	0.492897	0.563098	0.38715	0.287756	0.901122
MC58_07845	thymidine kinase	1	2487	-1.76	3.84759e-08	-0.275933	0.622634	-0.356342	0.476731	-0.424573	0.783358
MC58_07850	transcriptional regulator	1	2365	-1.37288	6.31688e-07	0.0074385	0.987667	-1.33533	3.99634e-05	-0.305774	0.557721
MC58_07855	UTP--glucose-1-phosphate uridylyltransferase	3	743	0.298265	0.235644	-0.0373946	0.938801	0.102184	0.816948	1.1293	0.00957017
MC58_07875	formyltetrahydrofolate deformylase	1	1656	-1.14062	1.32446e-05	0.229096	0.62826	0.526555	0.111772	-0.212891	0.850897
MC58_07885	tRNA	2	351	-0.788426	0.258492	0.318778	0.82449	4.23427	1.30062e-05	-0.911953	0.486926
MC58_07890	tRNA	2	316	2.36472	0.00100934	-1.07002	0.342972	3.80457	0.00647389	0.351012	0.933666
MC58_07900	nitrate reductase	1	1671	-1.66917	0.00501106	1.43794	0.127904	-0.154541	0.860654	0.407461	0.847329
MC58_07945	cation transport regulator	4	82	2.73166	9.7508e-12	-0.254768	0.552405	-0.808013	0.0684983	0.219478	0.888696
MC58_07955	2-dehydro-3-deoxyphosphooctonate aldolase	1	1832	-2.11098	3.35863e-10	0.180911	0.716212	0.356802	0.283124	-0.175083	0.890464
MC58_07960	hypothetical protein	1	1988	-3.28056	3.7959e-12	0.385934	0.518215	0.0212472	0.945853	-0.57158	0.218111
MC58_07965	hypothetical protein	1	1750	-2.17163	9.03649e-07	-0.195786	0.831948	0.61512	0.271779	-0.0910064	0.964501
MC58_07970	SAM-dependent methyltransferase	1	1837	-2.08347	5.46219e-07	0.338481	0.662206	0.497357	0.554253	-0.222679	0.938376
MC58_07975	peptide chain release factor 1	1	2082	-2.6075	1.76329e-10	0.433653	0.391563	0.396796	0.343887	0.0997363	0.945084
MC58_07980	glutamyl-tRNA reductase	3	930	-0.946415	0.000409431	0.597272	0.127215	1.05675	0.0130501	0.387202	0.710094
MC58_07990	kinase	1	2773	-2.42714	1.63019e-09	-0.14008	0.800617	0.313849	0.492284	-0.102277	0.945084
MC58_07995	ribose-phosphate pyrophosphokinase	1	1945	-3.10346	3.43129e-11	0.182466	0.782214	-0.916233	0.0437707	-0.319157	0.847329
MC58_08000	transporter	1	1806	-2.17915	5.0467e-06	0.286159	0.766267	0.931819	0.023263	-0.221599	0.88022
MC58_08005	hypothetical protein	1	1231	0.0633105	0.796151	-0.236282	0.622634	-1.37508	0.0202973	-0.085242	0.974428
MC58_08015	GTP-binding protein	1	2584	-1.59397	2.78325e-09	0.173953	0.622634	-0.535234	0.115733	-0.0478831	0.969527
MC58_08035	hydrogenase	1	2687	-1.9692	0.00436236	0.305457	0.831928	0.0926351	0.856114	-0.0376465	0.97908
MC58_08040	hydrogenase 1 b-type cytochrome subunit	1	2184	-2.39299	0.0155114	0.0862584	0.96985	1.94418	0.00350708	-0.749775	0.40842
MC58_08060	cytochrome d terminal oxidase subunit 1	1	2613	-1.39529	0.0206365	-0.583519	0.634544	0.26068	0.67129	-0.298685	0.829975
MC58_08065	cytochrome d ubiquinol oxidase subunit 2	1	2820	-2.28758	3.62372e-05	0.393123	0.716212	-0.846795	0.154572	-0.296103	0.85977
MC58_08075	glutamate dehydrogenase	1	1187	-0.314623	0.132567	0.141571	0.708253	-1.91715	4.33556e-07	0.0252911	0.982044
MC58_08080	trehalase	3	454	2.51679	5.19705e-12	-0.447355	0.201395	-0.706716	0.0283537	-0.45995	0.400229
MC58_08085	hypothetical protein	4	113	4.17522	2.39138e-14	0.179752	0.667843	-0.192836	0.732405	0.265275	0.872486
MC58_08095	hypothetical protein	1	2444	-1.81006	0.000260399	0.729578	0.427201	-0.440006	0.385439	0.292616	0.85977
MC58_08100	L,D-carboxypeptidase A	3	698	0.8186	0.0200171	-0.252539	0.725957	1.06924	0.00109388	0.18326	0.869946
MC58_08105	potassium/proton antiporter	1	2563	-1.25892	1.11215e-06	0.0710188	0.889357	-0.580715	0.164923	-0.196271	0.909197
MC58_08115	amino acid dehydrogenase	3	398	1.17143	6.34779e-07	0.314387	0.301328	-1.08691	0.00559102	0.204767	0.850897
MC58_08120	SpoVR family protein	4	109	4.16849	5.49379e-18	-0.420361	0.180207	-0.547136	0.136076	-0.225765	0.806837
MC58_08125	fatty acid metabolism regulator	1	2449	-1.79581	6.4894e-08	0.596318	0.173612	-0.277494	0.462257	0.0731091	0.959888
MC58_08135	disulfide bond formation protein B	1	1425	-1.11141	0.00878521	1.10609	0.124645	0.388181	0.54899	0.422766	0.828078
MC58_08140	cytoplasmic protein	2	257	-2.72712	9.77292e-06	3.03721	0.000174555	0.480548	0.373411	2.47524	0.000228318
MC58_08145	gns	3	361	1.72291	1.60634e-06	-0.1991	0.729487	-0.517566	0.459644	0.0697367	0.980357
MC58_08150	hypothetical protein	4	245	2.27407	0.00030227	3.40192	8.87659e-07	-0.294786	0.646381	1.18788	0.206736
MC58_08155	hypothetical protein	1	1690	-1.53871	0.000333719	0.900239	0.223936	0.334841	0.462604	0.291118	0.844758
MC58_08170	septum formation inhibitor	1	2707	-1.68729	1.84497e-08	0.470236	0.197874	-0.42692	0.240938	-0.143565	0.917505
MC58_08175	cell division inhibitor MinD	1	1923	-2.58189	2.72098e-12	0.510154	0.152578	-1.12915	0.00461784	-0.233145	0.85977
MC58_08180	cell division topological specificity factor MinE	1	2324	-1.12811	0.0202114	-0.339945	0.74499	-0.630211	0.28056	-1.08315	0.158147
MC58_08185	ribonuclease D	3	1070	-1.32216	0.00169991	0.000166026	0.999713	0.430015	0.415428	-0.382399	0.827067
MC58_08190	long-chain fatty acid--CoA ligase	3	440	1.0718	1.44171e-05	-0.481124	0.151691	-1.33423	0.000455296	-0.298695	0.771956
MC58_08200	hypothetical protein	1	1592	-1.18536	1.08268e-05	0.449071	0.274074	0.283851	0.4709	0.0616047	0.966999
MC58_08205	ATP-dependent helicase	1	1441	-1.17913	4.17622e-05	0.329712	0.512658	0.411128	0.171437	0.548193	0.304116
MC58_08215	hypothetical protein	3	825	-0.546559	0.158648	0.171879	0.848055	1.11006	0.0136306	-0.402849	0.752961
MC58_08220	aminodeoxychorismate synthase	3	1027	-1.41714	6.27565e-07	0.31472	0.514606	0.301661	0.378454	-0.579842	0.405911
MC58_08230	serine dehydratase	1	2854	-2.4331	2.25767e-12	0.315496	0.444488	-0.319073	0.583676	0.17567	0.928057
MC58_08235	c-di-GMP phosphodiesterase	4	83	2.40939	9.33008e-11	-0.343324	0.412179	-0.773743	0.0814596	0.0367502	0.981218
MC58_08240	membrane protein	1	2384	-1.92152	9.73914e-08	0.873019	0.0712232	-1.16638	0.00329642	0.558729	0.495246
MC58_08245	hypothetical protein	1	1202	-1.32712	0.000415491	0.848955	0.176658	-0.777593	0.194464	-0.364114	0.867704
MC58_08250	PTS mannose transporter subunit IIAB	1	2751	-1.83211	2.99319e-09	0.00411327	0.993593	-0.0340374	0.936683	-0.517466	0.44608
MC58_08255	PTS mannose transporter subunit IIC	1	2753	-2.19631	2.41183e-11	-0.0950785	0.820931	0.0159044	0.969676	-0.901754	0.0915069
MC58_08260	PTS mannose transporter subunit IID	1	2636	-1.51627	3.71364e-07	0.0750237	0.895814	-0.120624	0.752708	-0.448634	0.583873
MC58_08270	hypothetical protein	2	334	-0.411914	0.436476	0.559202	0.592416	5.85301	3.88826e-05	0.483096	0.912195
MC58_08275	23S rRNA methyltransferase	1	1788	-1.88538	1.46922e-07	0.456093	0.436963	1.48816	0.000702604	-0.0420783	0.980579
MC58_08280	peptidoglycan synthase	3	923	-1.31402	4.69243e-05	0.80514	0.125485	0.65862	0.18946	0.0265984	0.985859
MC58_08285	cold-shock protein	1	2722	-1.8052	1.65043e-07	0.350541	0.544376	-0.0543715	0.943056	-0.494194	0.828078
MC58_08290	hypothetical protein	1	2635	-1.5388	1.4655e-07	0.0110009	0.98131	-0.212511	0.646871	-0.639259	0.416666
MC58_08295	hypothetical protein	1	2686	-1.98346	4.97303e-05	0.344913	0.730154	0.0795377	0.905024	-0.050233	0.981882
MC58_08300	PhoPQ regulatory protein	1	2140	-1.97475	0.000212521	-0.651096	0.529272	1.40975	0.0106797	0.0891164	0.9622
MC58_08305	hypothetical protein	4	128	3.18039	1.39817e-10	-0.560102	0.274074	0.178843	0.77718	0.878618	0.379825
MC58_08315	multidrug MFS transporter	3	594	1.5234	6.51255e-05	0.29525	0.63695	-0.0859312	0.890477	0.633914	0.574515
MC58_08320	heat shock protein HtpX	1	1316	-2.61773	1.41085e-11	1.60106	1.97631e-05	-1.87488	5.46139e-06	1.00902	0.0519223
MC58_08325	carboxy-terminal protease	1	2690	-1.99273	3.79105e-09	0.112919	0.805177	-0.0347605	0.941153	-0.167678	0.898023
MC58_08330	prop expression regulator	1	1836	-2.13597	1.00281e-10	0.304207	0.426971	0.228262	0.471689	-0.212007	0.824611
MC58_08340	membrane protein	3	432	1.06202	0.000118482	-0.204376	0.693359	-0.271042	0.399114	-0.0835107	0.944941
MC58_08350	RNA methyltransferase RsmF	3	988	-1.14659	0.000371437	-0.00990501	0.991171	1.21969	0.00514633	0.010206	0.993048
MC58_08355	hypothetical protein	4	182	4.05921	5.21273e-15	0.104583	0.790829	1.63092	7.96945e-05	0.645341	0.216435
MC58_08360	hypothetical protein	4	92	2.80121	1.02645e-10	0.33471	0.452487	0.0203303	0.96479	0.633888	0.304009
MC58_08365	serine/threonine protein phosphatase	3	583	2.10701	1.87683e-06	0.350205	0.575375	0.348254	0.231555	0.300803	0.682982
MC58_08370	membrane protein	1	2334	-1.28562	0.036903	-0.208719	0.877975	-0.979563	0.0524311	-1.98691	0.00451914
MC58_08375	type III secretion protein SopE2	1	2159	-2.22016	0.00120394	-1.38867	0.311681	-0.0920009	0.856504	-0.750616	0.195832
MC58_08380	cytoplasmic protein	1	2286	-2.73858	1.82092e-05	0.714929	0.518215	1.16767	0.0557222	-0.477186	0.751233
MC58_08385	hypothetical protein	1	1398	-1.59609	0.000956832	0.159846	0.877422	0.776448	0.204885	0.868759	0.32603
MC58_08390	blasticidin S-acetyltransferase	3	847	0.122681	0.793972	-0.0669452	0.947463	1.91478	1.86889e-07	-0.425164	0.45928
MC58_08395	hypothetical protein	3	445	0.38322	0.18097	-0.919443	0.0839262	-1.32829	0.000702604	-0.461211	0.648186
MC58_08400	hypothetical protein	3	503	0.251409	0.498903	-1.15433	0.0888917	-1.27852	0.018644	-1.61599	0.0473846
MC58_08420	multidrug DMT transporter permease	1	2604	-1.70803	0.0037815	-0.752221	0.512658	0.102687	0.883315	0.0420076	0.981153
MC58_08440	PagK	1	1220	-1.45978	0.000728422	-0.339674	0.72164	-1.91286	0.00111797	-0.53024	0.754492
MC58_08455	hypothetical protein	3	668	1.20527	0.0312279	0.586195	0.544376	0.731921	0.0946183	-0.362254	0.710377
MC58_08470	DNA breaking-rejoining protein	3	516	0.910005	0.109715	-1.9116	0.0353701	1.18616	0.0746511	-0.436861	0.775675
MC58_08475	hypothetical protein	2	299	-1.96068	0.00566411	-1.01777	0.490565	2.56009	9.25108e-06	0.455987	0.589496
MC58_08480	lytic enzyme	3	777	0.144242	0.761085	0.427519	0.645524	2.5296	1.75468e-07	-0.773418	0.202586
MC58_08485	hypothetical protein	3	732	-1.05249	0.15032	-1.5325	0.29663	-0.262202	0.739304	1.46156	0.0402554
MC58_08495	exodeoxyribonuclease VIII	1	2521	-1.08026	0.00934287	-0.305876	0.744844	-0.371997	0.410266	0.186607	0.901061
MC58_08545	superoxide dismutase	1	1258	-0.877813	0.000920119	-0.0252646	0.967984	-1.23468	0.00397502	0.509887	0.636102
MC58_08565	muraminidase	3	854	-1.02117	0.0153388	-0.416474	0.641137	1.45287	0.00217352	-0.0922644	0.958828
MC58_08570	endonuclease	3	1057	-1.15719	0.0376074	-0.184184	0.884985	0.961199	0.11348	-0.781492	0.398166
MC58_08575	virulence protein	1	1495	-1.57182	0.00016497	0.164883	0.861367	0.294262	0.48399	0.0469415	0.976948
MC58_08580	lipoprotein	1	1879	-3.84455	7.92911e-14	0.519086	0.382108	0.618883	0.376506	-0.0529814	0.982044
MC58_08595	antiterminator	1	1331	-1.99918	0.00297718	0.185801	0.901639	-1.20283	0.261594	1.7343	0.150092
MC58_08600	DNA breaking-rejoining protein	1	1487	-1.79825	0.0228352	0.378484	0.815936	0.342018	0.785406	0.179704	0.960135
MC58_08630	integrase	1	2734	-2.76131	2.92339e-05	0.525228	0.680311	0.00223269	0.997869	-0.744372	0.414271
MC58_08635	cytoplasmic protein	3	657	2.23055	0.000681051	0.594788	0.572205	2.22475	0.000370934	0.771795	0.369552
MC58_08640	hypothetical protein	1	2333	-1.56636	0.00353554	-0.338809	0.756237	-1.24531	0.0355294	-1.44474	0.075508
MC58_08655	DNA polymerase III subunit theta	1	2192	-2.2246	0.000157984	1.1735	0.239186	1.59297	0.0248311	-0.472445	0.784365
MC58_08660	carbon-nitrogen hydrolase	3	641	2.07297	2.92894e-08	-0.407602	0.415876	1.1037	0.0227002	-0.0344006	0.98353
MC58_08670	protease 2	3	568	1.20595	1.65897e-05	0.220341	0.603145	-0.605135	0.121076	0.0243971	0.983361
MC58_08675	membrane protein	4	214	0.0752247	0.791813	1.65297	2.16971e-05	0.334533	0.478014	1.47439	0.00496001
MC58_08680	hypothetical protein	3	418	1.20079	2.06106e-06	-0.295096	0.473265	-0.124125	0.723531	-0.408369	0.550329
MC58_08685	damage-inducible protein YebG	3	588	1.8571	5.6656e-07	0.174862	0.756739	-0.542301	0.242806	0.851415	0.301935
MC58_08690	phosphoribosylglycinamide formyltransferase	3	931	-1.18242	0.00378787	0.432186	0.605576	1.12789	0.00776178	0.388847	0.715242
MC58_08700	phosphogluconate dehydratase	3	924	-1.2984	0.000126237	0.704572	0.200398	0.85762	0.185283	0.351814	0.874224
MC58_08720	lipid A biosynthesis (KDO)2-(lauroyl)-lipid IVAacyltransferase	1	1529	-1.32701	2.44425e-06	0.154997	0.76729	-0.449433	0.259117	0.03101	0.983361
MC58_08725	peptidase	1	2858	-2.52542	3.26064e-11	0.648335	0.0886929	-0.421756	0.336772	-0.187415	0.903043
MC58_08730	zinc ABC transporter substrate-binding protein	3	920	-1.14054	8.36686e-05	0.878046	0.0160089	0.50426	0.136076	-0.0171088	0.985798
MC58_08735	zinc ABC transporter ATPase	1	1657	-0.83283	0.00388456	1.04423	0.0189555	-0.0663928	0.900574	-0.168401	0.919894
MC58_08740	high-affinity zinc transporter membrane component	1	2837	-2.13858	1.46497e-05	0.908575	0.274074	-0.485171	0.336446	-0.289182	0.872486
MC58_08765	Holliday junction resolvase	3	779	0.473026	0.387205	0.745414	0.44175	1.89118	0.0233605	-0.266646	0.918471
MC58_08770	hypothetical protein	1	1636	-1.37431	1.74299e-06	0.0488874	0.928172	0.57749	0.182507	-0.122446	0.941865
MC58_08775	dihydroneopterin triphosphate pyrophosphatase	1	1509	-1.49976	6.81609e-06	0.152787	0.818798	0.873387	0.0505399	0.0700328	0.970289
MC58_08780	aspartyl-tRNA synthetase	1	1728	-2.27338	2.22599e-10	0.294339	0.520359	0.184728	0.653394	0.0508149	0.973083
MC58_08785	hydrolase	4	168	2.96624	1.20633e-12	0.173255	0.66721	0.88601	0.0168588	0.333117	0.683078
MC58_08790	hypothetical protein	3	578	1.80738	4.19299e-08	0.0104096	0.984775	0.658126	0.139676	0.213164	0.903153
MC58_08805	tRNA methyltransferase	3	1063	-1.29995	0.00129044	-0.0115037	0.991668	0.164067	0.675374	-0.517645	0.533755
MC58_08810	copper homeostasis protein CutC	3	750	0.419074	0.116559	1.12627	0.00358071	-0.827659	0.0429033	0.432627	0.700601
MC58_08815	hypothetical protein	1	1406	-1.13317	0.000720083	0.498665	0.434043	-0.33906	0.380925	0.460785	0.598729
MC58_08820	arginyl-tRNA synthetase	1	1763	-1.97322	2.64658e-09	0.561209	0.195464	0.751504	0.0148683	0.107598	0.924887
MC58_08835	flagellar protein flhE	3	649	1.81768	0.0019952	-0.676504	0.495188	0.979327	0.0146151	-0.0110489	0.990495
MC58_08840	flagellar biosynthesis protein FlhA	1	1475	-1.59767	5.24423e-05	0.408794	0.585122	0.0311731	0.962979	0.424091	0.793377
MC58_08845	flagellar biosynthesis protein FlhB	1	1668	-1.73375	0.00220988	1.34369	0.15313	0.735706	0.277574	-0.299806	0.853675
MC58_08855	chemotaxis protein CheY	1	2489	-1.70749	4.16751e-05	-0.168812	0.856825	-0.251286	0.663714	-0.697845	0.45928	Chemotaxis and motility (che-mot) operon
MC58_08860	chemotaxis protein	1	2622	-1.78177	2.58703e-05	-0.367071	0.682545	-0.0814389	0.931802	-0.500855	0.831387
MC58_08870	chemotaxis protein	1	1233	-0.351585	0.154228	-0.562426	0.262568	-1.18744	0.00942218	-0.331826	0.844147
MC58_08880	chemotaxis protein CheA	1	2754	-2.08909	1.84092e-08	-0.344429	0.575375	0.0538132	0.916537	-0.874217	0.271244
MC58_08885	flagellar motor protein MotB	1	2336	-2.09097	1.93954e-05	-0.031908	0.97757	-0.490088	0.444912	-1.25398	0.181588
MC58_08890	flagellar motor protein MotA	1	1456	-1.70523	2.2069e-05	-0.298528	0.72164	-0.270038	0.679952	0.404282	0.828078
MC58_08895	transcriptional regulator	1	2821	-2.23751	1.69196e-07	0.231866	0.770734	-0.821223	0.193023	-0.375963	0.850089
MC58_08900	transcriptional regulator	1	2853	-2.49745	1.51465e-10	0.216101	0.719395	-0.312182	0.470207	0.0352451	0.982874
MC58_08905	hypothetical protein	1	1675	-1.98511	0.00428699	1.23505	0.275509	-0.37916	0.500927	0.180022	0.904179
MC58_08910	universal stress protein UspC	1	1915	-2.79676	8.44723e-09	0.550891	0.471833	-1.6004	6.28839e-06	-0.0414704	0.974428
MC58_08915	trehalose-6-phosphate synthase	4	17	4.54292	1.74907e-19	0.248006	0.427047	0.610074	0.0818404	0.94983	0.022505
MC58_08920	trehalose phosphatase	4	42	4.99363	1.10912e-18	0.574922	0.0847604	0.706205	0.00436888	1.17558	0.000117688
MC58_08945	outer membrane lipoprotein	1	1159	-2.83172	7.47461e-06	1.10178	0.256906	0.40565	0.67129	-0.642471	0.700702
MC58_08950	ferritin	1	2230	-3.02187	2.67242e-13	0.256481	0.563387	1.51257	0.000207155	-0.0389996	0.979872
MC58_08965	hypothetical protein	1	1200	-1.05357	0.00182584	0.49627	0.391563	-0.876417	0.0325377	-0.287828	0.84705
MC58_08970	glucose-6-phosphate dehydrogenase	1	2173	-2.87141	2.44878e-06	0.0415139	0.972014	0.381742	0.642405	-2.64861	0.0039421
MC58_08975	cell wall hydrolase	1	2883	-2.65615	1.93593e-06	0.352237	0.743245	-0.130881	0.828607	-0.304857	0.845524
MC58_08990	tRNA	3	852	-0.40027	0.472631	0.108361	0.927542	2.21019	0.00417197	-0.807982	0.550329
MC58_08995	tRNA	3	786	-0.0656495	0.891014	0.480844	0.598599	2.07685	0.000409021	0.487206	0.714759
MC58_09000	phosphatidylglycerophosphate synthetase	1	2063	-2.79919	3.84832e-10	0.781331	0.182596	0.0181167	0.97142	-0.157522	0.922473
MC58_09005	excinuclease ABC subunit C	1	2585	-1.60016	4.8045e-07	0.148193	0.768501	-0.592257	0.103495	-0.0783824	0.952576
MC58_09025	LuxR family transcriptional regulator	1	2646	-1.62764	0.000406963	0.203605	0.844284	-0.379666	0.386051	-0.639031	0.387039
MC58_09055	flagellar biosynthesis sigma factor	1	1528	-1.35091	2.58703e-05	0.0295248	0.967226	-0.221934	0.692198	0.136128	0.944941	Flagella formation (fli) operon
MC58_09060	lysine-N-methylase	1	1452	-1.71216	0.000104182	-0.353798	0.701476	0.451595	0.422947	0.449277	0.749291
MC58_09065	flagellin	1	1267	-1.9944	1.47811e-09	-0.894123	0.0360149	-1.48642	0.00463538	-0.0798681	0.973573
MC58_09070	hypothetical protein	1	1266	-1.70085	2.24482e-06	-1.17042	0.0516809	-2.02827	0.01476	0.0505317	0.98353
MC58_09075	flagellar protein FliD	1	1221	-1.75238	3.25276e-06	-0.12265	0.879585	-1.76442	0.0301329	-0.756728	0.677015
MC58_09080	flagellar protein FliS	3	1060	-1.36669	0.00119402	-0.435569	0.607304	0.709752	0.449902	-0.770381	0.647373
MC58_09090	cytoplasmic alpha-amylase	3	480	2.15696	1.80144e-09	-1.31137	0.00141268	0.481172	0.1873	-0.340292	0.737543
MC58_09100	hypothetical protein	3	976	-1.85101	9.23363e-06	0.182375	0.832372	1.60806	0.0306549	-0.0672451	0.98099
MC58_09105	hypothetical protein	1	1164	-2.38085	0.00161851	0.879057	0.518215	0.418168	0.457122	0.0482981	0.974428
MC58_09115	flagellar hook-basal body protein FliE	1	1672	-1.8194	0.00739928	1.23663	0.266773	-0.0412609	0.952629	0.41324	0.705709
MC58_09120	hypothetical protein	1	2769	-1.9217	0.00012118	0.108607	0.92213	0.190981	0.860009	-1.16009	0.387966
MC58_09125	flagellar motor switch protein G	3	1079	-1.49525	0.000320964	-0.182152	0.848992	0.558048	0.440794	-0.267659	0.912195
MC58_09130	flagellar assembly protein H	1	1485	-1.74668	0.00063043	0.349028	0.740539	0.226828	0.772003	-0.0326526	0.985798
MC58_09135	ATP synthase	3	982	-1.42635	0.00169629	0.357013	0.708253	0.793371	0.221558	-0.201426	0.918471
MC58_09140	flagellar biosynthesis chaperone	1	2555	-1.13953	0.0152384	0.352982	0.723732	-0.600645	0.346558	-0.337379	0.840556
MC58_09150	flagellar basal body-associated protein FliL	1	2371	-1.52262	0.000344355	0.526849	0.512052	-1.07311	0.210039	-0.397092	0.861335
MC58_09155	flagellar motor switch protein FliM	1	1812	-2.11206	3.01762e-07	0.658466	0.323037	0.34945	0.597312	-0.570803	0.622109
MC58_09160	flagellar motor switch protein FliN	1	1791	-1.63188	0.00164909	0.70578	0.471833	0.836527	0.485224	-0.689472	0.772584
MC58_09170	flagellar biosynthesis protein flip	1	2204	-1.42634	0.0177613	0.652424	0.572205	0.806485	0.128356	-1.99817	0.00257632
MC58_09180	flagellar biosynthesis protein FliR	4	222	1.3918	0.0260373	-0.0293595	0.981189	1.49283	0.0120748	1.60964	0.0178218
MC58_09185	capsule biosynthesis protein CapA	4	223	1.05349	0.0486112	1.05187	0.201455	0.902566	0.283124	3.3468	0.000591646
MC58_09190	hypothetical protein	3	388	2.17812	1.04662e-06	-0.532403	0.406259	-0.756045	0.39364	0.427804	0.897046
MC58_09195	hypothetical protein	4	23	5.00619	3.38597e-16	0.15113	0.724836	-0.0887061	0.898763	0.478095	0.693033
MC58_09200	mannosyl-3-phosphoglycerate phosphatase	4	30	4.25757	6.42129e-14	-0.380681	0.370588	0.487852	0.290956	0.368443	0.76266
MC58_09210	hypothetical protein	3	559	1.49718	0.00110705	0.35868	0.651138	-0.0117077	0.983092	0.0957684	0.951716
MC58_09215	hypothetical protein	3	429	1.21158	1.46465e-05	-0.526869	0.230475	-0.575032	0.182913	0.0307944	0.98353
MC58_09220	multidrug DMT transporter	3	831	-0.603967	0.154646	0.272594	0.767669	1.8839	0.00261643	0.100335	0.96584
MC58_09250	cold-shock protein	1	2183	-2.20377	4.09758e-10	0.376344	0.410728	2.10404	0.00010878	-0.594736	0.621722
MC58_09355	oxidoreductase	1	2581	-1.58747	2.35795e-05	0.113107	0.890669	-0.774295	0.191856	0.0950883	0.970289
MC58_09360	sialic acid transporter	1	2789	-1.92951	0.000666822	-0.29361	0.797022	0.0728457	0.927175	-0.136487	0.94183
MC58_09365	membrane protein	1	2360	-2.33559	0.000172886	0.267077	0.830472	-1.66825	0.0133461	-0.252139	0.912195
MC58_09370	N-acetylneuraminic acid mutarotase	1	1968	-3.07524	1.67657e-07	0.15254	0.902257	-0.67167	0.394329	-0.712983	0.682982
MC58_09375	N-acetylmannosamine-6-phosphate 2-epimerase	3	1036	-2.29963	0.000102356	0.0377952	0.976071	0.643781	0.295193	-0.852701	0.288774
MC58_09380	acetylneuraminate ABC transporter	1	2261	-2.80335	4.97396e-10	-0.041243	0.961187	0.548028	0.243059	-0.414119	0.778778
MC58_09385	N-acetylmannosamine kinase	1	2069	-2.97474	9.33008e-11	0.440852	0.500245	0.156668	0.657616	-0.153498	0.907366
MC58_09390	hypothetical protein	4	110	4.63994	3.85976e-19	-0.623338	0.0277511	-0.57145	0.0507434	-0.311761	0.547897
MC58_09395	protein phoH	4	39	5.22357	5.86244e-20	-0.725886	0.00955882	-0.170422	0.639703	-0.305484	0.622109
MC58_09400	proline:sodium symporter PutP	1	1928	-2.89907	4.6525e-08	0.762876	0.355495	-1.08427	0.00299342	0.3007	0.793377
MC58_09405	transcriptional regulator	1	1896	-3.5818	4.61556e-12	0.912517	0.0693195	-1.42127	0.0244655	0.0298442	0.987181
MC58_09415	transcriptional regulator	4	158	2.15997	2.27972e-08	1.01981	0.00527153	0.895266	0.0168682	-0.239106	0.84705
MC58_09420	stress-induced protein	4	46	5.45763	1.75139e-17	1.1819	7.94154e-05	-0.409844	0.364836	0.321707	0.752472
MC58_09425	NAD(P)H:quinone oxidoreductase	3	601	2.84814	2.25468e-14	-0.296654	0.366078	-0.0666022	0.805968	-0.00378431	0.994154
MC58_09430	hypothetical protein	4	86	2.9634	8.34117e-15	0.162209	0.65213	-0.723852	0.0583398	-0.131786	0.912195
MC58_09440	alkyl hydroperoxide reductase	1	1807	-2.33726	7.81262e-05	0.288201	0.808033	0.804974	0.209869	-0.172584	0.920959
MC58_09445	DSBA oxidoreductase	1	2781	-2.63629	9.77686e-06	-0.0854127	0.944026	0.248762	0.700965	0.0590642	0.974428
MC58_09450	protein-disulfide reductase	1	2226	-2.84509	1.8251e-07	0.895449	0.297849	1.84356	0.00639591	-0.557366	0.712956
MC58_09460	DNA-binding protein	3	428	1.22499	6.68683e-06	-0.251226	0.525205	-0.273017	0.548124	0.214166	0.850897
MC58_09470	anti-adapter protein IraM	1	2151	-1.27068	0.000842727	-1.46556	0.0353701	1.25653	0.0302394	-0.843889	0.43331
MC58_09500	5-carboxymethyl-2-hydroxymuconate delta-isomerase	3	437	1.01035	0.0281426	0.5428	0.503856	-0.439473	0.493791	-0.888777	0.463782
MC58_09505	3,4-dihydroxyphenylacetate 2,3-dioxygenase	3	436	1.16106	0.000419781	0.225568	0.704119	-0.596759	0.159706	-0.736328	0.440625
MC58_09520	homoprotocatechuate degradative operon repressor	1	2387	-2.15497	1.4861e-05	0.45567	0.636683	-1.28524	0.00834711	0.734686	0.44608
MC58_09525	Pyoverdin chromophore biosynthetic protein pvcC	3	416	1.37673	0.000288808	-0.422709	0.524956	-0.0255508	0.969999	-0.26426	0.907366
MC58_09535	hydroxyisourate hydrolase	3	1006	-1.03057	0.000136775	0.166305	0.740539	1.14006	0.00106006	-0.581523	0.311291
MC58_09540	transcriptional regulator	1	1610	-1.06665	0.00027174	0.497457	0.345981	0.743904	0.0529667	-0.109715	0.944941
MC58_09550	peptidase	1	1943	-3.6142	5.96024e-15	0.31745	0.534331	-0.835719	0.00509746	-0.491514	0.454144
MC58_09560	hypothetical protein	1	1173	-4.39509	1.13843e-09	0.929349	0.376839	-5.45738	5.32687e-08	2.38979	0.0119794
MC58_09565	inositol phosphatase	1	2249	-2.83237	3.52821e-07	0.110642	0.921449	0.549801	0.256953	-0.971987	0.216435
MC58_09570	type III secretion chaperone protein SigE	1	2250	-2.60229	3.85378e-05	-0.421069	0.733654	0.838487	0.229487	-0.213701	0.918471
MC58_09600	membrane protein	3	754	-1.16597	2.96037e-06	1.80241	3.82888e-08	-1.47945	0.000964143	1.0522	0.0847087
MC58_09605	sulfur transfer protein TusE	3	909	-0.966903	0.0214163	0.584199	0.482135	1.35828	0.00524861	0.278466	0.854867
MC58_09610	acylphosphatase	3	563	1.18368	0.0115609	-0.144847	0.881444	0.252909	0.65404	-0.11523	0.953896
MC58_09620	kinase inhibitor	1	2540	-1.10941	0.00219432	0.553687	0.420356	-0.283422	0.524602	0.110467	0.945084
MC58_09635	hypothetical protein	4	98	2.50543	5.7558e-11	-0.151676	0.738683	-0.320047	0.384241	0.295576	0.768561
MC58_09640	hypothetical protein	3	448	2.05787	4.5639e-07	-0.867747	0.109371	-1.31798	0.00501811	-1.19377	0.178352
MC58_09645	methylglyoxal synthase	1	2411	-1.36594	5.13418e-06	0.159152	0.787476	-0.666616	0.118911	0.537689	0.600247
MC58_09660	membrane protein	1	2468	-2.02764	1.81653e-07	0.39147	0.55615	-0.293192	0.601221	0.363374	0.829911
MC58_09665	Crp/Fnr family transcriptional regulator	1	2509	-1.03048	0.0172268	-0.0516153	0.963261	-0.614788	0.127846	0.137735	0.931728
MC58_09675	membrane protein	3	509	0.278307	0.161006	-1.74405	2.57632e-08	-0.65211	0.0353094	-0.913524	0.0119846
MC58_09680	Ter macrodomain organizer matS-binding protein	1	2386	-2.28225	6.97436e-07	0.52426	0.499332	-1.40907	0.000414902	0.699863	0.310655
MC58_09685	Lon protease	1	1491	-1.92588	3.13686e-09	0.162057	0.740052	0.208953	0.669518	-0.042883	0.98099
MC58_09690	3-hydroxydecanoyl-ACP dehydratase	1	2451	-2.01197	3.00757e-09	0.215542	0.698459	-0.584841	0.101746	0.771143	0.204105
MC58_09695	ribosome modulation factor	3	751	0.631962	0.0514741	1.67992	0.000132838	-0.83872	0.0401062	-0.197548	0.897046
MC58_09700	lipoprotein	1	2755	-2.08037	3.37054e-07	-0.351727	0.653844	-0.149481	0.777938	-0.480023	0.727083
MC58_09705	paraquat-inducible protein B	1	2506	-2.08295	2.02384e-10	-0.00707836	0.989375	-0.510362	0.110028	-0.477236	0.470579
MC58_09710	paraquat-inducible membrane protein A	1	2523	-1.2727	5.68461e-06	-0.363321	0.461692	-0.223802	0.532886	0.0445056	0.974428
MC58_09715	ABC transporter ATPase	1	2100	-2.61458	8.67115e-13	0.355728	0.38904	-0.0430944	0.936813	0.0499647	0.976402
MC58_09720	23S rRNA methyltransferase	1	1764	-2.03467	1.66726e-08	0.429395	0.417992	0.61655	0.0684983	-1.47132e-05	0.999963
MC58_09735	dihydroorotate dehydrogenase	1	2229	-3.11256	4.0004e-11	0.305447	0.658145	1.87949	3.64758e-05	-0.215946	0.875638
MC58_09740	aminopeptidase N	1	2595	-1.8886	8.21353e-09	0.298705	0.494657	-0.575043	0.0583398	-0.121779	0.912195
MC58_09770	pathogenicity island 2 effector protein SseI	1	1855	-3.53327	1.91133e-09	0.246069	0.813213	-0.92148	0.0725331	-1.35332	0.0917482
MC58_09800	enterohemolysin	1	2616	-1.1393	0.00812015	-0.297701	0.757684	0.0614496	0.910212	-0.470881	0.634975
MC58_09805	nicotinate phosphoribosyltransferase	3	932	-1.04634	0.000214532	0.571569	0.234788	0.901993	0.0967242	0.0507351	0.982044
MC58_09810	amino acid:proton symporter	1	1132	-3.06325	0.00101775	2.28397	0.0965424	0.831272	0.455195	-0.78973	0.683358
MC58_09815	diaminopropionate ammonia-lyase	1	2841	-2.08191	0.000252983	0.417351	0.704129	-0.77893	0.17488	-0.306776	0.843461
MC58_09825	asparaginyl-tRNA synthetase	1	2673	-1.71939	1.26204e-08	0.549367	0.153829	-0.193663	0.644649	0.0910226	0.945084
MC58_09830	porin	1	1960	-3.49511	3.59055e-17	0.450074	0.108517	-0.421671	0.187903	-0.873844	0.0828654
MC58_09835	aromatic amino acid aminotransferase	1	1470	-1.66472	4.89513e-08	0.526636	0.171334	0.0375373	0.940806	0.0772431	0.959917
MC58_09840	hypothetical protein	1	2556	-1.28754	0.00415569	0.374795	0.701028	-0.616523	0.179318	-0.274365	0.872486
MC58_09845	hypothetical protein	1	2546	-1.16906	5.08397e-06	0.271782	0.512052	-0.717003	0.125688	-0.0256116	0.985798
MC58_09850	murein L,D-transpeptidase	3	622	2.30745	2.26717e-13	-1.01666	5.62361e-05	0.511599	0.256032	-0.15212	0.918471
MC58_09855	cell division protein MukB	1	2457	-2.04155	5.47046e-10	0.484537	0.170139	-0.673622	0.0989264	0.29949	0.774433
MC58_09860	condesin subunit E	1	2456	-1.96398	2.25401e-09	0.621653	0.119587	-0.647532	0.0622578	0.221243	0.847329
MC58_09865	condesin subunit F	1	1589	-1.2103	7.07713e-06	0.493261	0.24777	0.213713	0.647168	0.0707179	0.967435
MC58_09880	hypothetical protein	1	1429	-1.29561	5.44951e-05	0.736077	0.158524	0.13857	0.7987	0.299341	0.847416
MC58_09895	hypothetical protein	1	2359	-2.19226	8.44272e-08	0.195007	0.796009	-1.72314	7.36408e-05	-0.0202991	0.986641
MC58_09905	lipid transporter ATP-binding/permease	1	1472	-1.61717	1.81314e-07	0.520172	0.227125	0.218293	0.596779	0.081946	0.9528
MC58_09915	integration host factor subunit beta	3	356	1.94584	4.02699e-09	-0.159332	0.717329	-0.765145	0.033123	0.11362	0.918471
MC58_09920	30S ribosomal protein S1	1	1987	-3.44722	1.68665e-15	0.202495	0.595671	-0.143107	0.720333	-0.336741	0.604569
MC58_09925	cytidylate kinase	1	1633	-1.45272	1.73363e-08	0.154296	0.681222	0.450054	0.185252	-0.0387712	0.975316
MC58_09935	3-phosphoshikimate 1-carboxyvinyltransferase	1	1568	-1.36878	1.36396e-06	0.14488	0.782214	-0.0409371	0.922253	-0.142466	0.912195
MC58_09940	3-phosphoserine/phosphohydroxythreonineaminotransferase	1	1587	-1.08674	5.60012e-05	0.600677	0.127919	0.264951	0.529314	0.143993	0.912222
MC58_09945	membrane protein	3	419	1.19049	0.000303626	-0.609867	0.274074	0.0987179	0.802544	-0.205382	0.862467
MC58_09950	ribosomal protein S12 methylthiotransferaseaccessory factor YcaO	3	901	-2.25421	1.95799e-07	0.509307	0.434589	1.89574	4.50592e-06	0.174115	0.891343
MC58_09960	pyruvate formate-lyase	1	2488	-1.92759	8.43809e-10	-0.462608	0.173246	-0.426108	0.253933	-0.379604	0.550329
MC58_09965	pathogenicity island 1 protein SopD2	1	2019	-4.10422	3.67189e-12	0.228034	0.796005	-1.04605	0.0550943	-0.419785	0.831387
MC58_09975	pyruvate formate lyase-activating enzyme 1	1	2517	-1.24257	1.08686e-06	-0.0595333	0.906971	-0.591508	0.100194	-0.25004	0.832751
MC58_09980	transporter	3	512	-0.143266	0.523467	-1.10756	0.00647547	-0.65028	0.0293147	-0.68741	0.215576
MC58_09985	MFS transporter	1	1876	-3.64747	9.34967e-12	0.75654	0.24967	0.669081	0.183904	-0.440545	0.784814
MC58_09990	hypothetical protein	1	1338	-3.2	0.000817556	-0.626726	0.767669	-1.75921	0.0917398	0.839975	0.710432
MC58_09995	dimethyl sulfoxide reductase	1	2758	-2.08492	0.000131687	-0.372207	0.738683	0.111695	0.866063	-0.626112	0.541494
MC58_10000	dimethyl sulfoxide reductase	1	1911	-3.24255	7.57967e-07	1.08365	0.297861	-0.897973	0.13131	-0.366022	0.818295
MC58_10005	dimethyl sulfoxide reductase	1	1898	-3.44794	2.28514e-12	0.752329	0.190255	-1.01153	0.0414882	-0.14632	0.944941
MC58_10010	seryl-tRNA synthetase	1	2714	-1.71749	3.80581e-09	0.325239	0.386707	-0.16211	0.681571	-0.0438911	0.974428
MC58_10015	recombination factor protein RarA	3	744	-0.0840534	0.688407	0.325381	0.348803	0.228705	0.519704	1.04087	0.015214
MC58_10020	lipoprotein chaperone	3	742	0.191409	0.422803	0.375268	0.323856	-0.0951493	0.842457	1.69309	0.000429792
MC58_10030	leucine-responsive transcriptional regulator	1	2557	-1.29999	2.65134e-07	0.413167	0.196883	-0.57962	0.0673217	-0.389066	0.530677
MC58_10035	thioredoxin reductase	1	1376	-1.48829	4.35766e-08	1.21909	2.92654e-05	0.550019	0.0926614	1.07136	0.00703253
MC58_10040	amino acid ABC transporter permease	1	2092	-2.66411	3.33427e-11	0.59929	0.230475	0.0974734	0.83186	0.0921395	0.951371
MC58_10045	amino acid ABC transporter permease	1	1907	-3.13192	4.13047e-12	0.624562	0.234788	-0.595442	0.117274	-0.120965	0.937644
MC58_10050	leucyl/phenylalanyl-tRNA--protein transferase	3	692	1.16063	0.000196741	-0.175273	0.763163	0.71589	0.00954527	0.136499	0.900117
MC58_10055	membrane protein	3	857	-0.830307	0.00430628	-0.522234	0.359599	2.17474	2.06393e-05	-0.396369	0.770629
MC58_10065	LysR family transcriptional regulator	4	163	2.05989	7.5114e-07	-0.254936	0.690545	-1.0249	0.0202973	1.47911	0.0225772
MC58_10070	quercetin 2,3-dioxygenase	3	365	1.63028	4.73507e-07	-0.0164985	0.976071	-0.281925	0.664198	-0.250563	0.912195
MC58_10110	stationary phase/starvation inducible regulatoryprotein CspD	3	438	1.82334	4.64233e-07	0.0141952	0.980827	-0.29819	0.573539	-0.680612	0.532502
MC58_10115	macrolide transporter	1	2582	-1.61371	1.25635e-06	0.142231	0.824072	-0.434979	0.344672	0.0375472	0.982874
MC58_10120	macrolide transporter	1	1523	-1.0515	0.000235462	-0.0896959	0.889537	-0.183776	0.599678	0.127031	0.918471
MC58_10125	VirK	1	1181	-4.57766	5.36527e-14	-0.0246007	0.977636	-2.22109	6.00758e-06	-0.180812	0.918471
MC58_10140	hydroxylamine reductase	3	911	-1.36469	0.00181368	0.648524	0.437198	1.22729	0.00922747	0.156686	0.922997
MC58_10145	HCP oxidoreductase	3	725	-0.0298499	0.944773	0.0152181	0.988891	1.36414	0.0178202	0.184587	0.925575
MC58_10150	pyruvate dehydrogenase	4	33	4.66234	2.12532e-18	-0.744549	0.0133878	0.629097	0.2045	0.10063	0.945084
MC58_10165	hypothetical protein	1	1688	-1.81047	3.75123e-06	0.891157	0.148102	0.63872	0.266794	0.316501	0.867394
MC58_10180	lipoprotein	3	463	2.12563	3.87783e-10	-0.749292	0.0228194	-0.476232	0.0604994	-0.306133	0.553872
MC58_10185	arginine ABC transporter ATP-binding protein	1	2626	-1.63915	7.55469e-08	-0.290429	0.473799	-0.0110824	0.982572	-0.343052	0.683078
MC58_10190	arginine ABC transporter substrate-binding protein	1	2501	-2.03103	8.3774e-11	-0.164158	0.689471	-0.356491	0.431609	-0.312177	0.82012
MC58_10195	arginine transporter permease subunit ArtQ	1	2490	-2.01886	6.35451e-10	-0.197831	0.701476	-0.32017	0.566821	-0.861929	0.446755
MC58_10200	arginine transporter permease subunit ArtM	1	1292	-2.87531	7.15784e-13	0.0238652	0.967226	-1.1803	0.000167695	-0.771084	0.134784
MC58_10205	arginine ABC transporter substrate-binding protein	3	1004	-0.756185	0.00228205	-0.062612	0.896246	1.02367	0.0014063	-0.661298	0.0909675
MC58_10215	PTS sugar transporter IIB	3	536	-1.57523	0.0235807	-1.7707	0.198778	0.543394	0.509043	-1.66106	0.0718441
MC58_10225	23S rRNA methyltransferase	3	941	-1.17083	0.0021674	0.464766	0.537445	1.3856	0.010837	-0.109007	0.960135
MC58_10250	spermidine/putrescine ABC transporter substrate-binding protein	3	483	1.2676	8.25306e-07	-0.931414	0.00120073	0.0820954	0.872132	-0.435248	0.571135
MC58_10255	hypothetical protein	1	1388	-1.83024	0.000722867	0.724804	0.475081	0.268871	0.762615	0.773301	0.60505
MC58_10275	glutaredoxin	2	287	-0.479102	0.0775161	2.40421	2.97945e-08	2.99219	5.51843e-06	1.43292	0.031956
MC58_10285	transporter	1	2112	-2.78738	6.2225e-10	0.207385	0.770734	-0.43461	0.329829	-0.3649	0.790677
MC58_10300	sugar phosphatase	1	2598	-1.01661	0.0105535	-0.125698	0.895083	0.36732	0.463441	0.154513	0.924887
MC58_10305	multidrug transporter	1	2282	-2.93447	2.41183e-11	0.460599	0.448438	0.781267	0.0668426	-0.116193	0.944941
MC58_10310	UDP pyrophosphate phosphatase	2	280	-0.912029	0.0037815	0.955082	0.0550713	1.90284	0.00233692	1.84147	0.0140254
MC58_10315	DeoR faimly transcriptional regulator	1	1433	-1.7433	4.15821e-08	0.53146	0.26026	0.634056	0.275272	0.614605	0.660544
MC58_10320	peptidase M15	3	442	1.22686	8.7615e-06	-0.953258	0.0163638	-1.11789	0.00100861	0.140656	0.916991
MC58_10325	glutathione S-transferase	3	423	1.16402	2.63968e-05	-0.292674	0.526787	0.36696	0.44416	-0.437253	0.705709
MC58_10330	sugar dehydrogenase	3	1009	-0.646447	0.359533	0.221521	0.880676	1.65046	0.00212333	-0.877199	0.143299
MC58_10335	glucose dehydrogenase	1	2148	-1.94498	0.000482472	-0.835794	0.467006	0.641965	0.139463	0.448924	0.671459
MC58_10345	LysR family transcriptional regulator	1	1745	-2.01154	0.00066328	0.00657125	0.996721	0.700309	0.163275	0.33513	0.774433
MC58_10350	electron transfer flavoprotein-ubiquinoneoxidoreductase	3	1071	-1.76868	0.000312394	-0.0127897	0.9919	0.467926	0.436082	-0.110175	0.954479
MC58_10360	acyl dehydratase	3	494	-0.807095	0.250951	-3.71894	0.00938188	-0.734635	0.270015	-0.35961	0.831192
MC58_10365	electron transfer flavoprotein subunit beta	1	2656	-1.96494	0.000199638	0.0447807	0.969647	-0.390469	0.536876	-0.0717577	0.974428
MC58_10370	electron transfer flavoprotein subunit beta	1	1891	-3.23966	2.88113e-07	1.1884	0.215952	-0.4933	0.295006	0.301593	0.828078
MC58_10375	citrate lyase	1	1123	-3.93911	3.21476e-08	2.02809	0.0266632	-0.04666	0.941626	-0.159599	0.924887
MC58_10385	ribosomal protein S12 methylthiotransferase	1	1795	-2.24788	2.3556e-07	0.727407	0.259577	0.935261	0.0159844	-0.0598607	0.970289
MC58_10410	isoaspartyl peptidase	3	689	0.846394	0.000559218	0.250875	0.568523	1.04156	0.0328132	0.473009	0.689774
MC58_10415	molybdopterin biosynthesis protein MoeA	3	929	-1.0285	0.000201524	0.610594	0.166679	0.787622	0.0952694	0.436565	0.733275
MC58_10420	molybdopterin-synthase adenylyltransferase	1	1444	-1.1815	0.0019251	0.619411	0.38639	0.596106	0.415119	0.366504	0.883982
MC58_10425	pyruvate formate lyase-activating protein	1	2001	-3.75068	1.36064e-05	-0.253463	0.89381	-1.85492	0.00145147	-0.112752	0.951716
MC58_10430	formate acetyltransferase	1	1163	-2.62877	1.10671e-05	1.02112	0.297788	0.266692	0.655095	-0.0104868	0.993048
MC58_10440	hypothetical protein	3	582	1.77255	5.33436e-06	0.157457	0.80132	0.447895	0.164463	-0.306383	0.752961
MC58_10450	membrane protein	1	1982	-3.03863	4.83556e-09	0.466412	0.581676	0.330335	0.572815	-0.486537	0.727083
MC58_10455	ABC transporter ATP-binding protein	1	1500	-1.3732	3.07172e-07	0.353744	0.373337	0.444075	0.347377	0.00463787	0.997394
MC58_10465	membrane protein	1	1503	-1.39963	0.00440396	0.505458	0.608522	0.563224	0.326883	0.0540242	0.97908
MC58_10470	manganese transport regulator MntR	1	1363	-1.07411	0.00466265	1.03359	0.096858	-0.409081	0.411019	0.486	0.711611
MC58_10475	phosphoethanolamine transferase	1	1877	-3.67868	8.27519e-14	0.497152	0.376839	0.65819	0.155382	-0.643103	0.560201
MC58_10480	membrane protein	3	511	0.344178	0.133411	-1.02245	0.00101933	-0.529078	0.183904	-0.391127	0.59518
MC58_10490	DNA starvation/stationary phase protection proteinDps	4	20	4.1835	4.07131e-18	-0.205902	0.550954	0.453759	0.115474	0.841782	0.0119794
MC58_10495	glutamine ABC transporter substrate-bindnigprotein	2	323	0.324715	0.241644	1.00831	0.00819024	3.01072	4.71565e-10	-0.251068	0.700702	Glutamine ABC transporter (gln) operon
MC58_10500	glutamine ABC transporter permease	3	792	0.0464153	0.889237	0.653836	0.255467	2.79032	3.48733e-07	-0.0553679	0.974428
MC58_10505	glutamine ABC transporter ATP-binding protein	3	889	-0.716097	0.00801588	0.689623	0.124645	2.7801	6.57647e-08	-0.241267	0.84705
MC58_10510	mechanosensitive channel protein	4	99	2.52359	1.02645e-10	-0.36047	0.408504	-0.254314	0.584013	0.215784	0.889844
MC58_10515	23S rRNA methyltransferase	1	2306	-2.42368	3.58284e-08	0.347799	0.646445	0.704352	0.154987	-0.523774	0.721892
MC58_10520	hypothetical protein	4	4	4.29366	4.33015e-13	-0.339416	0.494057	-0.188081	0.596779	0.377151	0.622192
MC58_10525	hypothetical protein	4	171	3.13559	4.72979e-05	-0.464553	0.703242	1.27714	0.0274029	0.777174	0.257487
MC58_10530	hypothetical protein	4	226	1.3717	0.00116193	3.83818	9.86436e-11	1.61094	0.0202862	2.00917	0.0212164
MC58_10540	ATP-dependent DNA helicase DinG	1	1477	-1.43313	5.27428e-07	0.314309	0.473265	0.278397	0.549451	0.361467	0.772584
MC58_10545	ATP-dependent RNA helicase RhlE	1	2231	-2.97346	3.82673e-12	0.341122	0.508833	1.63811	0.000266958	-0.272512	0.848057
MC58_10550	transcriptional regulator	4	90	2.60392	2.15305e-07	-0.245959	0.730069	0.352148	0.621478	0.946915	0.45426
MC58_10555	hypothetical protein	3	589	1.91848	2.95079e-07	-0.222691	0.696642	-0.28388	0.601221	0.763585	0.417211
MC58_10560	multidrug ABC transporter ATP-binding protein	3	590	1.12893	6.66796e-06	-0.245092	0.559949	-0.370016	0.328458	0.757836	0.192147
MC58_10575	membrane protein	3	609	2.54035	5.00108e-11	-0.0189228	0.969647	-0.306311	0.438226	-0.387272	0.622109
MC58_10580	hypothetical protein	4	194	5.81977	9.7486e-16	-0.57466	0.14057	0.395197	0.38715	1.00147	0.0877859
MC58_10585	cardiolipin synthase 2	4	25	4.4491	1.07325e-15	-0.579092	0.0953351	0.562344	0.160277	0.839876	0.1269
MC58_10590	membrane protein	4	127	3.67422	5.28286e-13	-0.673097	0.0953351	0.241059	0.474253	0.75845	0.0918376
MC58_10600	membrane protein	3	710	-0.140041	0.815373	-0.304297	0.789545	1.19701	0.00989009	0.799787	0.161011
MC58_10610	membrane protein	1	1226	0.955433	0.00131643	-0.0816161	0.88103	-1.73036	0.00157477	-0.11674	0.944941
MC58_10615	molybdopterin guanine dinucleotide biosynthesisprotein MoaE	1	1641	-1.10548	0.000522283	0.238662	0.718619	0.296628	0.651127	-0.0457992	0.983361
MC58_10635	molybdenum cofactor biosynthesis protein A	3	690	0.798888	0.000749517	0.10198	0.830472	1.09062	0.00333628	0.226583	0.850897
MC58_10640	hypothetical protein	1	1166	-2.70035	5.82842e-07	1.2292	0.132603	0.540248	0.494742	0.151029	0.96004
MC58_10650	hypothetical protein	1	1147	-3.1286	3.82866e-06	0.8054	0.478212	0.753557	0.352338	-1.24472	0.216435
MC58_10655	excinuclease ABC subunit B	1	1473	-1.33097	7.57967e-07	0.409727	0.29112	-0.00899127	0.986416	0.298988	0.778271
MC58_10660	dethiobiotin synthetase	2	261	-1.71195	0.049476	4.20412	0.000333892	1.54756	0.00159969	0.899874	0.157823
MC58_10665	biotin biosynthesis protein BioC	2	262	-2.02443	0.0444411	4.34115	0.00132923	2.22165	0.000117577	1.49224	0.0193936
MC58_10670	8-amino-7-oxononanoate synthase	2	264	-0.6345	0.306835	3.34214	6.66414e-05	3.59868	5.72228e-07	1.06595	0.145866
MC58_10680	adenosylmethionine-8-amino-7-oxononanoateaminotransferase	4	231	0.629777	0.210249	2.3719	0.00030965	2.85208	4.54956e-06	1.57479	0.0105045
MC58_10685	kinase inhibitor	4	170	2.95193	2.18371e-13	-0.137484	0.723968	1.20069	0.0023777	0.84905	0.107525
MC58_10690	histidine ammonia-lyase	1	1224	0.748312	0.00650106	0.0478451	0.924539	-2.18327	4.27215e-05	0.0882045	0.964501
MC58_10695	urocanate hydratase	1	1225	0.527082	0.0709796	0.0580533	0.91786	-2.59625	1.66862e-06	-0.127745	0.944941
MC58_10715	acyl-CoA thioesterase	1	1838	-2.15072	1.60737e-10	0.351361	0.446673	0.365607	0.631489	-0.370867	0.888696
MC58_10730	molybdate transporter ATP-binding protein	1	1716	-2.43755	5.54074e-05	0.188774	0.890379	-0.0412368	0.943056	0.464171	0.705709
MC58_10735	molybdate ABC transporter permease	3	1012	-1.17786	0.00926639	-0.0917831	0.9265	1.46787	0.045214	-0.547163	0.717321
MC58_10740	molybdate transporter	1	2463	-1.81847	1.06043e-05	0.366219	0.649992	-0.40129	0.411426	0.153358	0.932169
MC58_10745	membrane protein	3	749	0.606531	0.173602	0.916242	0.204562	-1.11004	0.0306549	0.466343	0.774433
MC58_10755	molybdenum ABC transporter ATP-binding protein	1	1586	-1.04722	6.68484e-05	0.37382	0.415876	0.0209064	0.969999	0.104739	0.950584
MC58_10760	membrane protein	1	1138	-1.71979	0.0215591	1.68003	0.152578	0.732499	0.258822	-1.29392	0.10513
MC58_10800	membrane protein associated with oxaloacetatedecarboxylase	3	851	-0.169188	0.763903	-0.275645	0.80368	2.11973	0.00136999	-0.897273	0.380843
MC58_10805	oxaloacetate decarboxylase subunit beta	1	2194	-2.53733	0.00867971	0.761384	0.698122	1.46651	0.031313	-1.60125	0.0718441
MC58_10815	oxaloacetate decarboxylase gamma chain	2	345	-0.762318	0.3342	-2.35944	0.149345	3.22321	2.61237e-05	-3.49013	8.00028e-05
MC58_10820	cation transporter	2	346	-0.854342	0.183325	-0.833779	0.518096	5.08398	4.88218e-07	-3.96943	6.56086e-05
MC58_10825	LysR family transcriptional regulator	1	1580	-1.37621	0.0337789	-0.0518234	0.96985	0.210324	0.816676	0.049388	0.982044
MC58_10830	LysR family transcriptional regulator	1	1341	-2.95288	3.73512e-07	0.00310872	0.997596	-1.37573	0.00296565	1.2489	0.0432539
MC58_10835	fumarate hydratase	2	355	-1.96976	0.000754759	-0.9531	0.39617	3.26	6.39956e-08	-2.25482	0.000229453
MC58_10840	fumarate hydratase	2	354	-1.55622	0.0044222	-1.05291	0.292912	2.3439	7.43178e-05	-1.97911	0.00108021
MC58_10845	phospho-2-dehydro-3-deoxyheptonate aldolase	1	2617	-1.25087	2.20691e-06	-0.0221964	0.966858	-0.259249	0.505923	-0.700273	0.310655
MC58_10850	hypothetical protein	3	366	2.07652	6.29704e-12	0.525374	0.0538094	-0.717678	0.00374458	-0.000637182	0.999105
MC58_10855	zinc transporter ZitB	4	28	3.81672	1.60722e-14	-0.496366	0.182596	0.813414	0.0242868	0.432079	0.547847
MC58_10860	nicotinamide riboside transporter PnuC	3	562	1.06186	0.00237532	-0.0597218	0.932102	0.030601	0.962191	-0.148395	0.944941
MC58_10865	quinolinate synthetase	3	771	-0.466533	0.180651	1.23567	0.0219526	1.26321	0.00561318	-0.304236	0.847329
MC58_10900	tRNA	2	336	1.15775	0.002426	0.838231	0.138423	4.40871	4.50592e-06	-0.194776	0.937644
MC58_10905	tol-pal system protein	1	2857	-2.56291	1.52928e-11	0.542833	0.190696	-0.518262	0.177342	0.0370246	0.980357	tolQRABpal gene cluster
MC58_10910	peptidoglycan-associated outer membranelipoprotein	1	1724	-2.07993	3.67791e-10	0.281199	0.506223	0.0543179	0.895361	0.362159	0.640985
MC58_10915	translocation protein TolB	1	1717	-2.5263	2.72928e-12	0.337445	0.344728	-0.138051	0.801759	0.34319	0.759541
MC58_10920	membrane protein	1	2120	-3.06989	1.01149e-11	0.505919	0.362817	-0.300554	0.473475	0.12338	0.931728
MC58_10925	colicin uptake protein TolR	1	1894	-3.74141	1.05021e-11	0.899341	0.172491	-0.609119	0.164419	0.193209	0.911003
MC58_10935	acyl-CoA thioesterase	1	1818	-2.08615	5.03627e-08	0.546713	0.361062	0.202807	0.695576	-0.121504	0.945084
MC58_10940	hypothetical protein	1	1355	-2.14445	0.000663628	0.580436	0.643332	1.85325	0.00150846	0.908225	0.203589
MC58_10950	cytochrome d ubiquinol oxidase subunit 2	1	1937	-3.33488	3.08822e-12	0.334012	0.557598	-0.793848	0.0558544	-0.0628485	0.973499
MC58_10955	cytochrome d terminal oxidase subunit 1	1	2027	-3.96619	7.46674e-16	0.444622	0.28433	-0.653494	0.207759	-0.176022	0.929612
MC58_10965	succinyl-CoA synthetase subunit alpha	1	2708	-1.58938	2.36961e-07	0.425661	0.274074	-0.303168	0.499161	-0.242811	0.872486
MC58_10970	succinyl-CoA synthetase subunit beta	1	2578	-1.66711	3.02679e-07	0.320926	0.467247	-0.529951	0.0742269	0.18916	0.840556
MC58_10975	dihydrolipoamide succinyltransferase	1	2710	-1.86635	1.67843e-09	0.414681	0.230475	-0.337095	0.519704	-0.00168832	0.999047
MC58_10980	2-oxoglutarate dehydrogenase	1	2415	-1.60326	1.18934e-06	0.265928	0.572205	-0.941933	0.00252086	0.291992	0.68632
MC58_10985	succinate dehydrogenase	1	2831	-2.28874	4.699e-11	0.12546	0.77921	-0.912779	0.0473355	-0.254245	0.891091
MC58_10990	succinate dehydrogenase	1	1839	-2.1239	2.92854e-11	0.225323	0.524956	0.405738	0.439953	-0.365766	0.828078
MC58_10995	succinate dehydrogenase	1	2257	-2.58007	3.21476e-08	-0.221412	0.798956	0.453201	0.461461	-0.688662	0.544722
MC58_11000	succinate dehydrogenase	1	2833	-2.60171	2.59993e-12	0.54389	0.18984	-0.434122	0.329829	-0.649586	0.522383
MC58_11005	membrane protein	3	739	-0.484964	0.448947	0.520567	0.663321	-0.322626	0.653779	1.55845	0.0162197
MC58_11020	endonuclease VIII	1	1574	-1.2394	0.0177142	0.147814	0.907939	0.266757	0.535647	0.147479	0.919894
MC58_11045	peptide permease	3	1058	-1.24005	6.44467e-05	-0.306039	0.622634	0.947017	0.0281068	-0.637141	0.486926
MC58_11050	deoxyribodipyrimidine photolyase	3	1076	-1.5236	1.16629e-06	-0.318756	0.563508	0.351289	0.367857	-0.358144	0.743502
MC58_11065	potassium-transporting ATPase subunit A	3	731	0.230651	0.707684	-1.47858	0.153829	0.226193	0.781241	2.70242	0.00216993
MC58_11075	potassium-transporting ATPase subunit C	3	701	0.324246	0.488956	0.423175	0.643332	1.26494	0.037532	0.742279	0.547897
MC58_11085	transcriptional regulator	3	686	1.08149	0.00108785	0.143707	0.820931	0.924044	0.101746	0.365778	0.847329
MC58_11095	ornithine decarboxylase	1	2011	-4.25505	5.88575e-11	0.90651	0.295718	-0.396444	0.730557	0.13312	0.966999
MC58_11100	putrescine transporter	1	1940	-3.73783	5.35789e-09	0.144338	0.907939	-0.58703	0.277574	-0.194081	0.907578
MC58_11105	5-nitroimidazole antibiotic resistance protein	1	2866	-2.31789	2.65675e-05	0.372766	0.732072	-0.321473	0.577324	-0.217296	0.912195
MC58_11120	acyl-CoA esterase	3	721	-0.00135691	0.997619	0.204002	0.804193	1.1407	0.00966626	0.0608556	0.973573
MC58_11125	LexA regulated protein	3	797	0.160313	0.697336	0.40319	0.612486	2.55431	1.87295e-06	-0.126602	0.932783
MC58_11135	ferric uptake regulator	1	2433	-1.25131	5.00003e-06	0.461648	0.280566	-0.512267	0.295032	0.274068	0.85977
MC58_11150	tricarballylate utilization protein B	3	823	-0.262548	0.587195	0.17759	0.870075	1.01509	0.0488199	-0.443043	0.74513
MC58_11160	hypothetical protein	1	2877	-2.59812	6.91979e-07	0.895665	0.287603	-0.19526	0.731009	-0.309002	0.828078
MC58_11165	chitoporin	1	1544	-1.45308	3.70343e-05	0.182461	0.797463	-0.218783	0.624696	0.204619	0.898378
MC58_11170	glutamate--tRNA ligase	1	1734	-2.25919	4.80334e-11	0.515167	0.160167	-0.064794	0.892136	0.284142	0.802481
MC58_11205	tRNA	2	338	1.34411	0.00364402	0.39373	0.627219	5.35124	1.31693e-10	-0.7859	0.250789
MC58_11210	tRNA	3	960	-0.922465	0.0658282	0.121709	0.91786	1.83269	0.000805233	0.124906	0.944941
MC58_11215	tRNA	3	886	-1.2769	0.00250081	0.733687	0.339916	1.95118	0.000377273	-0.141455	0.94063
MC58_11220	tRNA	3	882	-0.721967	0.214249	0.936545	0.376839	1.62621	0.00022757	0.273167	0.819333
MC58_11225	tRNA	1	2745	-2.39533	3.95723e-05	0.292573	0.799272	0.111718	0.867982	-0.62838	0.530424
MC58_11230	tRNA	1	2191	-1.90374	0.00386483	1.34254	0.194564	1.5218	0.00839792	-0.617965	0.447025
MC58_11245	2-octaprenyl-3-methyl-6-methoxy-1,4-benzoquinolhydroxylase	3	409	1.35888	6.01638e-07	-0.245003	0.526787	0.259673	0.596181	0.393822	0.714708
MC58_11270	apolipoprotein acyltransferase	1	1557	-1.08154	0.000114187	0.0979002	0.870856	0.106538	0.800168	-0.148854	0.918471
MC58_11275	amino acid transporter	3	611	2.20351	5.19932e-11	0.0483043	0.910402	-0.392586	0.332501	-0.297609	0.721909
MC58_11280	amino acid ABC transporter permease	3	670	1.48815	2.48017e-07	-0.0203423	0.967978	0.878833	0.15445	-0.306043	0.904179
MC58_11285	amino acid ABC transporter permease	3	425	1.02493	0.000115982	-0.211645	0.667182	0.500552	0.154196	-0.556654	0.463782
MC58_11290	arginine transporter ATP-binding subunit	3	671	1.06679	0.00376445	0.17712	0.805098	0.975128	0.103495	-0.507394	0.807514
MC58_11300	hypothetical protein	1	2513	-1.42775	9.13249e-05	-0.0560131	0.944245	-0.808806	0.13875	-0.165971	0.933666
MC58_11305	molecular chaperone HscC	1	1527	-1.44143	0.00133974	0.0522357	0.963261	-0.389996	0.455888	0.170492	0.928057
MC58_11310	DnaJ domain protein	3	1064	-1.44449	0.000252983	-0.135367	0.879312	0.176948	0.697362	-0.50778	0.603245
MC58_11315	hypothetical protein	1	2345	-2.04873	0.00074593	-0.80689	0.503176	0.0189	0.969999	0.330154	0.720248
MC58_11325	hypothetical protein	1	2326	-1.30985	0.0234855	-0.17343	0.890425	-0.564301	0.622464	-0.887969	0.667087
MC58_11335	hypothetical protein	3	441	0.775153	0.0139519	-0.70486	0.166257	-1.17971	0.00294111	0.0167016	0.987181
MC58_11345	2-keto-3-deoxygluconate permease	1	2637	-1.49557	0.000217909	0.00872797	0.993422	-0.0959773	0.874714	-0.529976	0.728937
MC58_11350	galactarate dehydratase	1	1926	-2.88346	2.07665e-08	0.403314	0.65213	-0.819878	0.0339091	-0.220887	0.867704
MC58_11355	D-galactarate dehydratase	1	1997	-3.58014	5.13676e-08	-0.120132	0.922616	-1.37007	0.0711602	-0.264566	0.921094
MC58_11360	leucine--tRNA ligase	1	2711	-1.78788	4.52055e-09	0.353709	0.323037	-0.333443	0.573539	-0.0312536	0.98353
MC58_11365	LPS biosynthesis protein	1	2561	-1.16154	8.08728e-06	0.0615422	0.906971	-0.476117	0.423755	-0.15232	0.944941
MC58_11380	threonine-phosphate decarboxylase	1	2374	-1.9246	5.32536e-06	0.623238	0.394223	-0.798612	0.0967477	-0.435301	0.774433
MC58_11390	hypothetical protein	3	876	-1.92784	2.48827e-06	0.217843	0.780887	2.0573	2.37853e-05	-0.68042	0.441159
MC58_11395	ribosome-associated protein	3	943	-1.11266	0.000234679	0.1761	0.783088	1.33273	0.00490405	-0.325913	0.832751
MC58_11400	50S rRNA methyltransferase	3	940	-1.32635	0.000377865	0.602098	0.382408	1.28822	0.00375897	-0.17895	0.918471
MC58_11405	penicillin-binding protein 2	1	2794	-2.1143	1.75359e-09	0.234039	0.675623	0.164473	0.723121	-0.315381	0.828078
MC58_11410	cell wall shape-determining protein	1	2816	-2.01278	8.34028e-10	0.0839097	0.880676	0.279652	0.578268	-0.297769	0.852762
MC58_11415	rare lipoprotein A	1	1499	-1.31598	1.75746e-06	0.282559	0.529106	0.385783	0.381058	0.152015	0.919894
MC58_11420	D-alanyl-D-alanine carboxypeptidase	1	1508	-1.57093	4.93981e-07	0.447752	0.344598	0.659984	0.184014	0.108401	0.956569
MC58_11425	hypothetical protein	1	1369	-1.06416	4.64156e-05	1.80917	6.17405e-07	-0.162309	0.727351	0.966635	0.0977726
MC58_11430	lipoate--protein ligase	3	842	-0.412167	0.230494	0.377008	0.595671	1.79875	0.000385099	-0.283035	0.85588
MC58_11435	LysR family transcriptional regulator	3	460	2.29458	2.92197e-10	-1.68797	2.38723e-05	-0.523893	0.224737	-0.241762	0.848057
MC58_11445	preprotein translocase subunit SecE	1	1371	-1.50591	0.00165421	1.70657	0.0153642	-0.470211	0.534908	1.0325	0.471431
MC58_11460	cold-shock protein	1	1211	-1.22795	3.49419e-05	0.834845	0.0417501	-1.5134	0.00116569	-0.0514203	0.977441
MC58_11465	phospholipid:lipid A palmitoyltransferase	1	2223	-2.64785	5.81913e-06	0.233735	0.846394	0.767731	0.196502	-0.935205	0.273217
MC58_11475	two-component response regulator DpiA	1	2624	-1.46267	0.00225986	-0.317351	0.759687	0.1043	0.826198	-0.247438	0.850897
MC58_11485	[citrate [pro-3S]-lyase] ligase	1	1329	-3.74734	0.000377791	1.4323	0.44674	0.0597512	0.945853	3.24658	0.000224312
MC58_11500	citrate lyase subunit alpha	2	294	-3.52551	0.00073643	1.80768	0.309002	3.45556	0.00172097	0.255611	0.944724
MC58_11515	citrate:succinate antiporter	1	1490	-1.7785	0.000209524	0.26747	0.768501	0.45467	0.261594	0.028912	0.982044
MC58_11520	ribonuclease I	1	2465	-1.84465	6.1497e-09	0.531433	0.220662	-0.198072	0.768973	0.337602	0.86166
MC58_11525	nucleoside diphosphate kinase regulator	1	1655	-1.03199	0.00050303	0.111215	0.869598	0.49319	0.241745	-0.20988	0.900117
MC58_11530	alcohol dehydrogenase	4	18	4.54828	4.49448e-18	0.0941968	0.80368	0.563431	0.0981104	0.757595	0.067649
MC58_11535	universal stress protein UspG	1	1213	-1.25912	9.38868e-07	-0.168446	0.660436	-2.29712	5.46139e-06	-0.603637	0.533462
MC58_11545	DMSO reductase	1	1368	-1.36526	0.0354087	0.895184	0.430952	-0.66181	0.230034	0.611608	0.448792
MC58_11550	DMSO reductase	3	1028	-1.37345	0.00662549	0.214609	0.851239	0.257707	0.546267	-0.658594	0.323463
MC58_11560	alkyl hydroperoxide reductase	2	268	-0.815644	0.0020809	2.67346	4.8183e-10	2.2455	3.82836e-07	1.31165	0.00167121
MC58_11565	alkyl hydroperoxide reductase	4	232	0.343479	0.188144	2.23999	3.76727e-08	2.65711	3.21234e-05	1.39533	0.0431229
MC58_11575	LysR family transcriptional regulator	1	2532	-1.33018	8.49296e-06	-0.216108	0.71842	-0.364902	0.303194	-0.147364	0.917505
MC58_11580	hypothetical protein	1	2778	-2.3355	2.16803e-07	-0.0758429	0.932102	-0.102635	0.892044	-0.475449	0.827278
MC58_11585	hypothetical protein	1	2485	-2.52821	1.41667e-09	-0.199167	0.784606	-0.50774	0.347671	-0.533	0.744842
MC58_11590	methionine aminotransferase	2	272	-0.748763	0.0354924	2.13329	2.16971e-05	1.06418	0.0176908	0.482173	0.64034
MC58_11595	oxidoreductase	3	767	0.144045	0.730049	1.51808	0.00943823	0.669755	0.115563	0.315716	0.827278
MC58_11600	hypothetical protein	1	1241	0.582032	0.121927	0.283767	0.708253	-1.03623	0.0221011	1.01246	0.17968
MC58_11605	carbon starvation protein A	1	1193	-0.452621	0.0903142	0.0948388	0.856025	-1.00188	0.0168588	0.3272	0.734835
MC58_11610	thioesterase	1	1287	-2.87108	8.38992e-08	0.722584	0.408448	-1.76045	0.000144727	-1.07958	0.0792596	Enterobactin biosynthesis (ent) locus
MC58_11615	2,3-dihydroxybenzoate-2,3-dehydrogenase	1	1319	-3.20926	1.58859e-09	0.816692	0.276286	-2.23428	0.000527106	0.287755	0.904179
MC58_11620	isochorismatase	1	1320	-3.26338	6.72529e-12	0.915968	0.0922845	-2.08219	3.86416e-05	0.328235	0.831387
MC58_11625	enterobactin synthase subunit E	1	1887	-2.98434	2.52554e-09	1.07679	0.0958496	-1.39947	0.00401287	-0.376615	0.819333
MC58_11630	isochorismate synthase	1	1901	-2.43474	1.07506e-05	1.21311	0.170982	-0.826543	0.260522	-0.540921	0.767281
MC58_11645	iron-enterobactin transporter membrane protein	3	560	1.13799	0.0151663	0.282374	0.748513	0.179616	0.819927	-0.0108326	0.994976
MC58_11650	iron-enterobactin transporter permease	3	524	0.117823	0.726167	-0.106014	0.888493	0.596976	0.366625	-2.17318	0.00369496
MC58_11660	O-antigen length regulator	1	1980	-3.18468	2.49397e-12	0.171386	0.790829	0.328859	0.436369	-0.652828	0.45928
MC58_11665	enterobactin synthase subunit F	1	2368	-1.94609	9.97083e-08	0.802464	0.101569	-1.96452	0.000315998	-0.276127	0.892895
MC58_11670	invasin	1	2317	-2.29963	0.00015424	1.62022	0.0871016	-1.45565	0.0505399	-1.45702	0.210955
MC58_11675	enterobactin esterase	1	1205	-1.02797	0.0153865	1.05454	0.148102	-2.01735	2.39057e-06	-0.0705904	0.963528
MC58_11680	outer membrane receptor protein	1	1925	-3.0197	6.63404e-11	0.515537	0.407383	-1.05276	0.0230799	-0.153501	0.933798
MC58_11685	phosphopantetheinyltransferase	1	1317	-3.30005	1.08393e-06	1.31642	0.184673	-1.9152	0.0281691	1.07468	0.44608
MC58_11690	gamma-glutamyl ligase	4	118	3.07628	8.35755e-14	-0.807598	0.0119498	-0.817122	0.022836	0.166936	0.888696
MC58_11700	transcriptional regulator	4	213	0.00108891	0.998374	1.67087	0.0235316	0.0739234	0.892136	2.07544	0.000518239
MC58_11705	TetR family transcriptional regulator	1	1678	-1.87874	8.80101e-06	0.929489	0.170713	0.0597776	0.916637	0.320498	0.830527
MC58_11710	hypothetical protein	1	2417	-1.96525	3.94855e-06	-0.0427078	0.965853	-0.957576	0.0505399	0.297412	0.85977
MC58_11715	dihydropteridine reductase	1	2842	-2.19813	1.45231e-08	0.467395	0.421162	-0.657218	0.180252	-0.212819	0.918471
MC58_11720	lipase	3	481	1.08352	1.71587e-05	-1.01059	0.00599384	-0.103381	0.850354	-0.141393	0.933798
MC58_11725	miniconductance mechanosensitive channel	1	2527	-1.53468	1.79785e-06	-0.468499	0.434142	-0.534025	0.379925	-0.496541	0.784365
MC58_11730	aromatic amino acid transporter	1	1395	-1.2013	0.000688879	-0.277353	0.71842	0.536829	0.452204	0.702795	0.631059
MC58_11735	DNA repair protein	1	2669	-1.97838	8.38248e-07	0.304352	0.682738	-0.418779	0.333107	-0.330504	0.824611
MC58_11740	membrane protein	1	1114	-3.33358	0.00153304	3.03139	0.0405131	-0.964778	0.106129	-0.758727	0.478372
MC58_11750	pyridine nucleotide-disulfide oxidoreductase	3	738	-0.302011	0.548444	0.677928	0.473271	-0.136712	0.801759	1.44778	0.0257379
MC58_11775	translocase	1	2293	-2.77897	9.5854e-12	0.338458	0.524723	0.712927	0.0648081	-0.398454	0.723183
MC58_11780	bactoprenol glucosyl transferase	1	1875	-3.38947	3.51248e-12	0.694384	0.234462	0.624005	0.172282	-0.392229	0.784741
MC58_11785	membrane protein	1	2017	-4.27685	5.52024e-13	0.562217	0.431482	-1.03749	0.0297611	-0.318774	0.852762
MC58_11790	transposase	1	2215	-2.27281	0.000197163	0.384747	0.744402	0.661863	0.217228	-1.2914	0.0431739
MC58_11795	tRNA	2	333	0.519405	0.507521	0.117241	0.942538	5.20292	1.81641e-06	1.46477	0.107915
MC58_11815	fimbriae Z protein	1	1861	-4.85046	2.87399e-09	-0.678949	0.649992	0.827969	0.329267	-1.35891	0.182006	Fimbrial (fim) operon
MC58_11820	adhesin	3	625	2.59145	2.78648e-06	-0.529277	0.50354	0.697659	0.144096	-0.141173	0.924887
MC58_11825	adhesin	3	1050	-1.76873	0.00114859	-0.302393	0.787476	0.774487	0.0989264	-0.816618	0.257487
MC58_11830	fimbrial protein	1	2704	-1.97514	2.12336e-05	0.739268	0.350896	0.106663	0.82983	-0.20239	0.898646
MC58_11835	fimbrial chaperone protein FimC	1	1122	-3.55835	6.53908e-05	1.69692	0.220662	0.807878	0.167218	-1.39114	0.0657529
MC58_11840	fimbrial protein FimI	1	2176	-3.48476	5.24423e-05	-0.381028	0.838807	1.53589	0.00267726	-2.39622	0.000229453
MC58_11845	type-1 fimbrial protein subunit A	1	2791	-1.66246	6.75884e-05	-0.198732	0.822285	0.0363653	0.958452	-0.0982157	0.96584
MC58_11850	methenyltetrahydrofolate cyclohydrolase	1	1637	-1.4268	1.22864e-05	0.0258314	0.969647	0.452652	0.242469	-0.168096	0.912195
MC58_11855	ribosome-associated protein	3	802	-0.49731	0.364429	0.112997	0.922457	2.88283	0.00252086	-1.4438	0.181347
MC58_11860	membrane protein	1	1335	-1.33369	0.0191981	0.397571	0.72164	0.162597	0.900008	1.64217	0.15686
MC58_11865	membrane protein	1	1332	-2.17068	0.000300918	0.55444	0.616399	-1.0929	0.0707863	1.7963	0.0154672
MC58_11870	membrane protein	1	1305	-2.14756	0.000208443	1.40234	0.121892	-0.486956	0.363132	0.938468	0.148724
MC58_11875	cysteine--tRNA ligase	1	2682	-1.68122	5.03627e-08	0.374349	0.390188	-0.00825742	0.983318	0.193235	0.839798
MC58_11880	peptidylprolyl isomerase	1	2435	-1.52368	8.10461e-08	0.508108	0.129851	-0.378969	0.118289	0.357488	0.380843
MC58_11885	UDP-2,3-diacylglucosamine hydrolase	3	942	-0.912047	0.00480147	0.339277	0.608605	1.28767	0.00318342	-0.126831	0.937644
MC58_11890	N5-carboxyaminoimidazole ribonucleotide mutase	3	864	-1.00491	0.000697902	0.462971	0.399886	2.33837	0.00110665	-1.13689	0.25868
MC58_11895	phosphoribosylaminoimidazole carboxylase	1	2210	-1.82077	3.03428e-06	0.392189	0.573659	1.33388	0.00193808	-0.656765	0.447305
MC58_11905	carboxylase	1	1418	-1.52593	0.0291391	0.188454	0.905645	-0.195921	0.801678	0.638838	0.535113
MC58_11910	hypothetical protein	1	1448	-1.56151	0.0124993	0.0928239	0.944026	0.354864	0.539149	0.920714	0.211804
MC58_11915	membrane protein FdrA	1	1789	-1.77771	0.0121132	0.730578	0.577993	0.542112	0.344172	-0.259905	0.850897
MC58_11920	ureidoglycolate dehydrogenase	1	2472	-2.70204	1.15734e-05	-0.479864	0.687521	-0.79771	0.0961559	0.360999	0.733275
MC58_11925	allantoate amidohydrolase	3	1015	-1.5689	0.00110589	0.125973	0.908562	0.298212	0.701897	-1.24598	0.168649
MC58_11935	glycerate kinase	1	1578	-1.50228	0.0065183	0.087377	0.941501	0.278836	0.640738	-0.115401	0.944941
MC58_11940	uracil/xanthine transporter	1	2349	-1.90803	0.00596988	-1.81739	0.194564	-0.277444	0.658046	0.702318	0.409422
MC58_11945	allantoinase	1	1383	-1.70215	0.00276853	1.01526	0.306378	0.186769	0.780878	0.923068	0.330673
MC58_11950	allantoin permease	1	1797	-2.11293	0.0024291	0.871081	0.48015	0.911061	0.276329	-0.40382	0.828078
MC58_11955	MFS transporter	3	521	-0.140143	0.822392	-0.651347	0.572992	1.38516	0.0450716	-0.581379	0.677015
MC58_11960	tartronate semialdehyde reductase	2	295	-3.9397	1.66503e-05	2.35005	0.0609972	3.3972	0.000125766	-0.212754	0.924887
MC58_11965	hydroxypyruvate isomerase	2	298	-1.45324	0.00723897	-0.297044	0.787476	3.3245	1.4716e-05	0.529493	0.73091
MC58_11970	glyoxylate carboligase	2	293	-1.66025	0.00306763	0.365324	0.744402	4.38637	1.86296e-07	0.685304	0.505931
MC58_11980	ureidoglycolate hydrolase	2	297	-2.52337	1.22704e-07	0.320335	0.709943	2.35817	3.02981e-07	0.445128	0.547746
MC58_11985	transcriptional regulator	1	2749	-1.98113	0.00104627	0.0957779	0.941501	-0.0260367	0.976826	-0.525131	0.766295
MC58_11990	tRNA 2-selenouridine synthase	1	1543	-1.50381	1.28517e-06	0.280037	0.595671	-0.122908	0.707151	0.161021	0.872486
MC58_11995	methionine ABC transporter permease	3	955	-1.22698	0.0176372	0.571144	0.572205	1.18941	0.00632512	-0.768328	0.161011
MC58_12000	methionine ABC transporter ATP-binding protein	3	1000	-1.09344	0.0129989	0.063828	0.950436	1.37289	0.0161068	-1.1614	0.154247
MC58_12005	methionine ABC transporter ATPase	1	2205	-1.57591	0.00108778	0.714135	0.44091	1.20809	0.00298644	-1.71552	0.00565413
MC58_12020	ABC transporter ATP-binding protein	3	561	1.00554	0.000925035	0.0950828	0.877841	0.273341	0.550537	0.0885223	0.959917
MC58_12035	hypothetical protein	1	1365	-1.05787	0.000145449	1.28766	0.000457462	-0.224767	0.5854	0.686163	0.243358
MC58_12040	membrane protein	1	1699	-1.93924	0.000278799	0.536729	0.607997	0.383817	0.532886	0.0470976	0.982044
MC58_12045	ABC transporter ATP-binding protein	1	2493	-1.66964	0.000761903	-0.40754	0.708253	-0.591359	0.336446	-0.712165	0.539449
MC58_12065	copper-transporting ATPase	1	2420	-1.68474	2.7544e-05	0.793733	0.144454	-0.749634	0.0450716	0.811766	0.160543
MC58_12070	hypothetical protein	1	1868	-3.35596	7.426e-08	0.444705	0.693359	0.201514	0.83186	-0.857369	0.512529
MC58_12080	hypothetical protein	1	1415	-1.63158	8.42912e-05	0.578258	0.451127	0.00458768	0.994501	0.560313	0.618981
MC58_12090	Fosmidomycin resistance protein	3	1005	-0.919774	0.00653803	0.257733	0.723773	1.31039	0.00490405	-0.605184	0.601505
MC58_12100	guanosine kinase	1	1512	-1.4167	1.04649e-06	-0.00733007	0.991266	0.804253	0.00737974	-0.0465387	0.970289
MC58_12105	acetyl esterase	1	1251	-1.32366	0.0314791	-0.239811	0.860333	-0.638806	0.391789	1.44054	0.096083
MC58_12110	ferrochelatase	3	596	1.2267	1.42645e-05	0.637854	0.0892662	0.350982	0.310033	0.96954	0.0314231
MC58_12115	adenylate kinase	3	892	-1.30221	1.47978e-05	0.159804	0.75839	1.93069	1.04192e-05	0.600098	0.380843
MC58_12120	heat shock protein 90	1	1302	-2.80388	4.50243e-11	1.49162	0.000372566	-0.522642	0.229305	0.496006	0.601505
MC58_12135	DNA polymerase III subunits gamma and tau	1	1593	-1.14909	6.1891e-05	0.405145	0.323037	0.33599	0.511272	0.032092	0.982874
MC58_12140	adenine phosphoribosyltransferase	1	1793	-1.6682	2.62094e-05	0.477067	0.518215	1.0035	0.0310854	-0.369977	0.816991
MC58_12150	primosomal replication protein N''	3	402	1.07867	4.13442e-05	-0.395591	0.363745	0.16136	0.757653	0.360698	0.805076
MC58_12165	hypothetical protein	1	1681	-2.23489	1.4727e-09	0.738351	0.0944865	0.0871085	0.873305	0.442769	0.699719
MC58_12170	transcriptional regulator	3	705	0.406392	0.406174	0.554112	0.539666	1.28323	0.00053714	0.262338	0.806837
MC58_12180	multidrug transporter	1	2619	-1.33315	5.30677e-06	-0.481878	0.210145	-0.183794	0.577916	-0.799107	0.0286736
MC58_12195	maltose acetyltransferase	3	652	1.37013	7.36952e-07	-0.569685	0.154854	1.00491	0.00118758	-0.149362	0.902238
MC58_12205	50S ribosomal protein L36	1	1295	-1.98208	1.16548e-05	3.60602	1.86407e-08	-3.08508	2.14369e-05	0.321397	0.90239
MC58_12210	50S ribosomal protein L31	1	1296	-2.11807	4.22916e-08	2.61826	2.57632e-08	-3.24749	1.07962e-05	0.482735	0.825883
MC58_12220	cysteine methyltransferase	1	2543	-1.46352	0.000323976	0.561997	0.467839	-0.29325	0.512396	-0.0843653	0.961084
MC58_12225	hypothetical protein	4	21	4.82439	8.03611e-20	-0.173247	0.608605	0.20171	0.50872	0.495126	0.177577
MC58_12235	ammonium transporter	5	1	2.99177	3.92276e-06	2.29083	0.000110354	8.38615	4.14191e-14	-0.39031	0.635638
MC58_12240	nitrogen regulatory protein P-II 1	5	2	5.39576	6.6208e-08	2.5439	0.000109085	11.4301	9.52058e-16	-0.105053	0.918471
MC58_12260	cysteine synthase	3	493	1.46718	0.000471389	-0.469042	0.523085	-3.90321	1.43318e-06	0.129805	0.960135
MC58_12265	thiamin pyrimidine pyrophosphate hydrolase	1	1198	-0.951309	0.000762514	1.09044	0.00712771	-0.886969	0.291637	-0.0409629	0.986641
MC58_12270	peptide ABC transporter substrate-binding protein	1	2373	-1.64312	3.87461e-05	0.493199	0.512261	-0.928735	0.0507764	-0.30566	0.860601
MC58_12280	thioesterase	3	479	2.4113	2.20036e-08	-1.73833	0.000720177	0.399499	0.438105	0.034498	0.98353
MC58_12285	hypothetical protein	1	1261	-1.25912	0.0195411	-0.179038	0.884985	-2.11284	0.0141599	0.243648	0.925575
MC58_12290	molecular chaperone	1	1938	-3.3996	9.22795e-15	0.457109	0.299737	-0.570417	0.0906106	-0.0162075	0.986641
MC58_12295	transcriptional regulator HU subunit alpha	1	2747	-2.34506	7.56973e-09	0.228985	0.724697	0.085149	0.872742	-0.747866	0.447903
MC58_12315	trigger factor	1	2271	-2.63982	6.93674e-12	0.0338793	0.942568	0.777735	0.0436257	-0.202857	0.874224
MC58_12320	transcriptional regulator BolA	3	455	3.25139	3.70659e-15	-0.302565	0.387286	-0.816881	0.00659495	-0.572363	0.135793
MC58_12325	hypothetical protein	1	1165	-2.61848	1.04712e-08	0.732809	0.255467	0.46025	0.171179	-0.0645376	0.963477
MC58_12330	muropeptide transporter	3	1041	-2.06444	3.17138e-06	0.471782	0.552405	0.678286	0.0960406	-0.586818	0.515504
MC58_12335	cytochrome o ubiquinol oxidase subunit II	1	1914	-2.83866	1.86483e-13	0.13855	0.727335	-1.83295	3.27873e-05	0.181691	0.900117
MC58_12340	cytochrome o ubiquinol oxidase subunit I	1	1283	-2.98537	2.18371e-13	0.200621	0.627219	-1.9043	1.29112e-05	-0.317961	0.780412
MC58_12345	cytochrome o ubiquinol oxidase subunit III	1	1282	-3.21913	1.79759e-15	0.253939	0.496778	-2.28912	1.66862e-06	-0.395979	0.738705
MC58_12350	cytochrome o ubiquinol oxidase subunit IV	1	1278	-2.84076	6.55818e-13	0.394231	0.374152	-2.59679	1.38547e-05	0.130063	0.949348
MC58_12355	protoheme IX farnesyltransferase	1	1281	-2.68932	1.55425e-12	0.416794	0.337444	-2.08029	6.28839e-06	-0.398649	0.748421
MC58_12360	tetratricopeptide repeat protein	1	1853	-4.16908	2.54874e-10	0.75837	0.440117	-0.876142	0.238997	-1.98887	0.0422331
MC58_12365	periplasmic protein	1	2168	-2.03261	1.27391e-05	-0.813826	0.364233	0.606765	0.188989	-0.574532	0.550329
MC58_12370	membrane protein	1	1619	-1.14641	0.000185499	0.302066	0.618011	0.659958	0.18388	0.321109	0.847416
MC58_12390	phosphonoacetaldehyde hydrolase	1	1432	-1.07667	0.0473166	0.884559	0.376839	0.550653	0.153535	0.809912	0.177257
MC58_12395	2-aminoethylphosphonate--pyruvate aminotransferase	1	1390	-1.96916	0.000597382	1.10143	0.255467	0.690724	0.154537	0.903118	0.244936
MC58_12405	2-aminoethylphosphonate ABC transporter substrate-binding protein	1	1350	-1.99728	0.00165281	1.55824	0.134416	1.577	0.00128857	1.61724	0.00806696
MC58_12410	phosphonate ABC transporter ATP-binding protein	1	1352	-1.6834	0.00345307	0.815436	0.436963	1.21972	0.0122003	1.476	0.0228892
MC58_12420	phosphonate ABC transporter permease	1	1397	-1.22632	0.0163895	0.109711	0.923208	1.01213	0.0054891	0.949818	0.0718441
MC58_12425	tRNA s(4)U8 sulfurtransferase	1	2227	-2.677	4.24826e-10	0.305249	0.627219	1.77672	0.00112585	-0.355979	0.847267
MC58_12440	1-deoxy-D-xylulose-5-phosphate synthase	1	1479	-1.38598	7.30389e-05	0.409426	0.485521	0.166931	0.720333	0.372763	0.721892
MC58_12445	oxidoreductase	3	600	2.72319	2.29718e-14	-0.390273	0.190696	-0.223455	0.64609	0.0407933	0.977801
MC58_12450	phosphatidylglycerophosphatase	3	957	-1.50543	0.00677293	0.70846	0.504472	1.40726	0.00582326	-0.636503	0.376318
MC58_12455	thiamine monophosphate kinase	1	2146	-1.6074	0.00631975	-0.352462	0.770281	1.21137	0.108474	-0.759761	0.547746
MC58_12460	transcription antiterminator NusB	1	2442	-1.68252	8.31239e-05	0.749778	0.321828	-0.405033	0.376506	0.38023	0.774685
MC58_12465	6,7-dimethyl-8-ribityllumazine synthase	1	1771	-1.86822	3.6756e-05	0.44238	0.619553	0.985376	0.00609837	0.422591	0.604569
MC58_12470	5-amino-6-(5-phosphoribosylamino)uracil reductase	1	1692	-1.52152	0.000648948	0.959405	0.207143	0.454664	0.353761	0.148961	0.931728
MC58_12480	lipoprotein	4	165	3.78442	9.38098e-13	0.247574	0.584869	0.688784	0.104016	2.58056	1.92283e-05
MC58_12485	ion channel protein Tsx	1	1998	-4.1238	2.05978e-14	-0.2338	0.734419	-1.35364	0.00252575	0.101281	0.952931
MC58_12495	hypothetical protein	1	2445	-1.88006	2.85739e-06	0.625822	0.333489	-0.420017	0.307775	0.291941	0.828078
MC58_12500	DeoR faimly transcriptional regulator	3	761	-0.820764	0.126972	1.68077	0.042338	0.227428	0.651127	-0.194686	0.904179
MC58_12505	glyoxalase	3	758	-0.501278	0.230236	2.84293	2.61192e-06	-0.421156	0.44201	0.420567	0.805076
MC58_12510	preprotein translocase subunit SecF	1	2115	-2.90956	1.02969e-10	0.283306	0.685444	-0.231979	0.597312	-0.383097	0.759218
MC58_12515	preprotein translocase subunit SecD	1	2309	-2.32278	2.5139e-11	0.386743	0.321974	0.428504	0.140884	-0.51005	0.375389
MC58_12520	preprotein translocase subunit YajC	3	984	-1.29665	9.62073e-05	0.275043	0.673991	0.957834	0.0793943	-0.0769638	0.974428
MC58_12525	queuine tRNA-ribosyltransferase	1	1822	-2.07032	6.97668e-10	0.410678	0.311681	0.71621	0.0805968	-0.254056	0.852762
MC58_12530	S-adenosylmethionine:tRNA ribosyltransferase-isomerase	3	874	-1.79767	5.35888e-06	0.28235	0.707425	1.95491	2.37853e-05	-0.763532	0.317139
MC58_12545	maltodextrin glucosidase	1	2787	-1.90409	2.9201e-07	-0.0492463	0.946782	0.196508	0.656371	0.252468	0.850897
MC58_12550	proline-specific permease	1	2310	-2.20566	4.82227e-07	0.349566	0.667182	0.578757	0.0807626	-0.507353	0.501847
MC58_12555	branched-chain amino acid ABC transportersubstrate-binding protein	3	946	-1.57412	3.66511e-06	1.08037	0.0171743	1.27678	0.000108583	0.0691	0.95058
MC58_12560	phosphate regulon sensor protein	1	2037	-2.81758	4.4779e-07	0.879039	0.330886	-0.457435	0.173322	0.808216	0.0861434
MC58_12565	transcriptional regulator PhoB	1	1309	-2.79573	1.92557e-12	1.23343	0.000899789	-0.0497395	0.887853	0.91169	0.00634704
MC58_12575	exonuclease SbcD	1	1689	-1.65617	1.13875e-05	0.729016	0.243118	0.280964	0.618841	0.34852	0.832751
MC58_12580	exonuclease SbcC	1	2848	-2.66046	1.74719e-11	0.409572	0.402909	-0.319456	0.363268	0.138102	0.917765
MC58_12595	recombination associated protein	3	925	-1.3545	0.000614353	0.624112	0.398828	0.899919	0.00639591	0.338205	0.700702
MC58_12605	AroM protein	3	464	1.959	1.79554e-10	-0.695442	0.0368582	-0.356468	0.427354	-0.118174	0.940284
MC58_12610	hypothetical protein	4	59	3.15969	1.486e-16	0.493118	0.0581412	-1.38594	6.22688e-07	1.11459	8.00028e-05
MC58_12615	shikimate kinase	3	717	0.745756	0.000825376	-0.38394	0.280992	1.40389	0.000620277	0.408416	0.641446
MC58_12630	diguanylate cyclase	4	140	2.74218	2.06547e-11	-1.08855	0.00516586	0.340677	0.312587	-0.675497	0.213237
MC58_12635	hypothetical protein	4	112	3.59327	5.90229e-18	-0.488495	0.0548764	-0.230907	0.654792	-0.859291	0.191915
MC58_12640	anti-RssB factor	1	2397	-1.93022	8.49781e-10	0.609582	0.0607258	-1.02873	0.00531468	0.0625584	0.960344
MC58_12645	multidrug transporter	1	1554	-1.0145	0.0266087	0.202019	0.846394	0.0065769	0.99244	-0.0605035	0.974428
MC58_12650	extensin	4	5	4.09821	1.02855e-13	-0.393369	0.349535	-0.274006	0.386051	0.252403	0.746463
MC58_12655	D-alanine--D-alanine ligase	1	2448	-1.77833	9.83114e-07	0.580441	0.295107	-0.310482	0.489897	0.172203	0.918471
MC58_12665	membrane protein	4	164	3.67001	1.56038e-12	1.35899	0.000307523	-0.0620362	0.917652	2.79182	1.23838e-05
MC58_12670	hypothetical protein	1	1737	-2.16422	9.11266e-08	0.642784	0.312993	0.0562238	0.894684	0.0891484	0.945565
MC58_12675	microcin B17 transporter	1	1443	-1.35095	0.000107284	0.582902	0.349969	0.518364	0.124951	0.329182	0.729869
MC58_12680	beta-lactam-binding protein	1	1706	-1.89153	8.79279e-06	0.832258	0.234788	0.455132	0.422773	0.216291	0.918471
MC58_12685	transcriptional regulator	3	1061	-1.1854	0.0232504	-0.0831752	0.943777	0.302019	0.733154	-0.999131	0.451943
MC58_12690	membrane protein	1	2756	-1.96994	7.18076e-08	-0.286684	0.67263	0.148798	0.631846	-0.540729	0.32603
MC58_12695	delta-aminolevulinic acid dehydratase	1	1430	-1.24737	1.1041e-05	0.663228	0.0892002	0.295545	0.370974	0.367059	0.596789
MC58_12700	propionyl-CoA synthetase	4	172	3.30683	1.94614e-09	-0.823009	0.175776	0.68127	0.0159844	0.976392	0.00368507	Propionate utilzation (prp) operon
MC58_12705	2-methylcitrate dehydratase	4	126	3.88656	1.171e-11	-0.887734	0.102052	0.0825033	0.840359	1.02779	0.0106011
MC58_12710	methylcitrate synthase	4	131	4.35842	3.66166e-11	-0.859219	0.196433	-0.569585	0.0563271	1.20478	0.000795503
MC58_12715	2-methylisocitrate lyase	4	133	3.75509	6.40011e-12	-0.653287	0.220662	-0.307967	0.508164	1.26986	0.011057
MC58_12725	hypothetical protein	4	104	4.23599	6.06024e-16	-0.629832	0.0992611	-0.227958	0.457884	-0.408795	0.32603
MC58_12730	membrane protein	1	2554	-1.09523	0.00244027	0.44312	0.536034	-0.602699	0.314044	-0.313587	0.895568
MC58_12740	AraC family transcriptional regulator	1	1195	-0.301694	0.376596	0.647324	0.296125	-1.0813	0.0298101	0.0983634	0.961084
MC58_12745	hypothetical protein	4	76	3.46157	0.000108268	-0.823265	0.529578	0.253619	0.694816	0.14554	0.919894
MC58_12750	ubiquinol oxidase subunit II	3	381	2.19281	2.37615e-09	-0.533325	0.201341	-0.181788	0.708902	-0.0467796	0.976948
MC58_12755	cytochrome D ubiquinol oxidase subunit I	3	603	2.53968	1.92296e-10	-0.507935	0.230475	-0.294184	0.495442	0.00351548	0.997394
MC58_12760	hypothetical protein	4	61	3.18549	9.76161e-12	-0.557821	0.200682	-0.127927	0.740911	0.186215	0.872486
MC58_12765	type III restriction-modification system StyLTIenzyme res	1	2802	-1.97887	1.57896e-11	-0.000103364	0.999713	-0.01212	0.969567	-0.251823	0.706233
MC58_12770	restriction endonuclease StyLTI	1	1828	-1.94528	8.80121e-10	0.298592	0.499332	0.478883	0.0470712	-0.255912	0.702541
MC58_12775	sugar transporter	4	186	2.53527	1.23149e-09	-0.507956	0.292912	1.38183	0.000287609	-0.33357	0.752961
MC58_12780	hypothetical protein	4	141	2.9441	4.22044e-07	-1.39547	0.0420289	0.50883	0.270979	-0.901376	0.207828
MC58_12815	lipoprotein	3	506	-0.988282	0.0820539	-0.95387	0.37676	-0.783753	0.125616	-1.63111	0.0120929
MC58_12820	membrane protein	1	2416	-1.72078	0.00493947	0.0315937	0.981238	-1.15186	0.213557	0.293654	0.918471
MC58_12845	diguanylate cyclase	3	468	1.79249	2.73114e-08	-1.24326	0.00194561	-0.0310179	0.927464	-0.159905	0.85977
MC58_12855	membrane protein	1	2736	-2.59942	4.50082e-07	0.465825	0.592105	0.352619	0.601179	-0.747979	0.407158
MC58_12875	fimbrial protein	3	1091	-1.71143	0.00115214	0.0382683	0.973686	0.710211	0.0924343	-0.386299	0.725325
MC58_12880	fimbrial assembly protein	1	2050	-3.61641	7.39877e-08	1.01523	0.336786	0.168942	0.784117	0.306538	0.84705
MC58_12885	membrane protein	1	2127	-2.97753	0.000987566	-0.189004	0.924962	-0.290362	0.805968	-0.156962	0.960135
MC58_12890	cytoplasmic protein	1	1203	-1.29544	0.0281444	0.749339	0.482388	-0.644537	0.408614	-0.531909	0.762268
MC58_12910	3-isopropylmalate dehydratase	1	1144	-2.58927	4.09218e-05	1.22657	0.206402	0.821111	0.157183	-1.38241	0.0755812
MC58_12915	isopropylmalate isomerase	1	2201	-1.82797	1.54725e-05	0.161967	0.860333	1.58779	3.5599e-05	-1.94762	0.00142001
MC58_12920	permease	1	2179	-2.97746	7.22317e-06	0.585365	0.621469	1.81392	0.0430507	-1.95863	0.0574968
MC58_12925	hypothetical protein	1	1214	-1.28062	1.52195e-06	0.0882268	0.840734	-2.21053	1.21945e-06	-0.622807	0.44608
MC58_12945	tRNA	2	331	1.83004	0.00045937	0.423463	0.617358	5.71136	9.97363e-13	0.101089	0.941919
MC58_12950	gamma-glutamyl phosphate reductase	1	2724	-1.65614	1.15044e-06	0.381357	0.518215	-0.00848143	0.989354	-0.215421	0.912195
MC58_12955	gamma-glutamyl kinase	1	1598	-1.36205	7.36952e-07	0.539569	0.171885	0.19575	0.642405	-0.0169153	0.986641
MC58_12960	porin	1	2772	-2.13097	0.000152571	-0.125754	0.916348	0.262423	0.651127	-0.0363586	0.983361
MC58_12975	xanthine-guanine phosphoribosyltransferase	3	1098	-1.75353	9.5823e-07	0.439802	0.48015	0.603113	0.312599	-0.382719	0.847329
MC58_12980	aminoacyl-histidine dipeptidase	1	2458	-2.04939	9.05705e-11	0.44228	0.185427	-0.633734	0.193654	0.152395	0.919894
MC58_12990	peptide chain release factor H	3	972	-1.84198	6.40363e-06	0.00216849	0.997596	1.23183	0.0283477	0.0118071	0.993048
MC58_13000	transpeptidase	1	2189	-2.51522	2.95244e-08	0.36269	0.646445	1.58649	0.0142373	-0.884938	0.550329
MC58_13010	phosphoheptose isomerase	1	1542	-1.41825	6.29055e-05	0.311584	0.635362	-0.242217	0.557214	0.287657	0.809769
MC58_13015	acyl-CoA dehydrogenase	3	433	1.40375	8.91066e-07	-0.639881	0.0585264	-0.412447	0.210039	-0.365767	0.510225
MC58_13020	carbon-nitrogen hydrolase	3	691	1.21578	2.07296e-05	-0.00462712	0.993736	0.686997	0.0906106	0.0175046	0.987181
MC58_13030	adhesin/invasin protein PagN	3	514	0.170395	0.647501	-1.27652	0.0405131	-0.042204	0.952836	-0.769968	0.547847
MC58_13040	transcriptional regulator	1	2144	-1.70404	0.000371364	-0.679953	0.489177	0.961853	0.0537985	-0.420865	0.754492
MC58_13050	hypothetical protein	1	1705	-2.10965	0.00019424	0.861449	0.349969	0.395883	0.695555	0.232746	0.919894
MC58_13055	carbohydrate transporter	1	2625	-1.39298	0.00439017	-0.424632	0.686504	0.0965744	0.890681	-0.410927	0.774433
MC58_13060	pilin structural protein SafD	1	2260	-2.72029	5.57461e-07	-0.201611	0.861649	0.46281	0.408879	-0.305514	0.867921
MC58_13065	pilin outer membrane usher protein SafC	1	2455	-1.97263	8.18642e-08	0.21446	0.745701	-0.656696	0.0590933	0.257474	0.828105
MC58_13075	pilus assembly protein	2	353	-1.40875	0.118727	-0.0653475	0.974124	3.74745	0.0028287	-3.25637	0.0732424
MC58_13120	hypothetical protein	1	1455	-1.70389	0.0062455	-0.330213	0.800617	-0.121126	0.872988	0.671552	0.447442
MC58_13125	hypothetical protein	1	1666	-1.95861	0.0151035	1.39754	0.304644	0.550315	0.453202	0.187364	0.918471
MC58_13130	hypothetical protein	1	1167	-2.54978	0.00110375	1.00096	0.473271	0.710522	0.201394	0.077727	0.961084
MC58_13135	sciB domain protein	1	2152	-1.57946	0.0183032	-1.56776	0.215685	0.422963	0.599057	0.0254332	0.987181
MC58_13160	ribonuclease H	1	2675	-1.82887	1.86266e-05	0.618927	0.421162	-0.022925	0.969621	0.197966	0.918471
MC58_13165	hypothetical protein	3	467	1.63512	2.40932e-05	-0.850457	0.149345	0.00625	0.990681	-0.24067	0.872486
MC58_13200	2,5-diketo-D-gluconic acid reductase	1	1561	-1.06755	0.0102776	-0.108738	0.910402	0.126966	0.822173	0.00403319	0.997394
MC58_13215	rRNA	2	328	0.545126	0.737551	0.113593	0.971382	3.54413	0.00922243	0.0428607	0.988595
MC58_13235	D,D-heptose 1,7-bisphosphate phosphatase	1	2067	-2.8027	1.50399e-07	0.569945	0.52892	0.167928	0.732191	-0.328302	0.830323
MC58_13240	DL-methionine transporter ATP-binding subunit	3	983	-1.45447	1.89013e-05	0.404252	0.521266	1.05039	0.0114391	0.0212595	0.98643
MC58_13245	DL-methionine transporter permease subunit	1	2740	-2.18638	1.11473e-09	0.421953	0.408504	0.0410684	0.913957	-0.736986	0.178352
MC58_13250	DL-methionine transporter substrate-bindingsubunit	1	2726	-1.72031	4.71121e-07	0.272551	0.64565	-0.0430627	0.907498	-0.110324	0.922997
MC58_13255	membrane protein	1	1445	-1.17854	6.81049e-05	0.513682	0.323037	0.446636	0.545251	0.331413	0.900713
MC58_13260	tRNA (adenine(37)-N6)-methyltransferase	3	980	-1.12677	0.00624254	0.364228	0.677944	0.846252	0.133816	-0.509924	0.774433
MC58_13265	proline--tRNA ligase	1	2098	-2.37192	4.13259e-10	0.508326	0.274139	0.250057	0.554253	-0.0435715	0.976948
MC58_13270	copper homeostasis protein	3	747	0.995973	0.00031943	1.27033	0.000258794	-0.325843	0.515617	1.26586	0.0381548
MC58_13275	hypothetical protein	4	219	1.67533	4.392e-06	1.14338	0.00427351	0.230037	0.699767	1.52565	0.0214425
MC58_13280	hypothetical protein	1	1582	-1.04108	0.000833351	0.395037	0.515253	0.136849	0.820028	0.196139	0.919894
MC58_13285	hypothetical protein	3	639	1.72095	3.09327e-06	-0.449416	0.435085	0.676611	0.0786814	0.450464	0.622109
MC58_13290	Rho-binding antiterminator	3	642	2.1367	9.70699e-05	-0.361165	0.695965	1.40525	0.000207	0.467872	0.510225
MC58_13295	tRNA(Ile)-lysidine ligase	1	2454	-1.94055	1.05755e-07	0.310944	0.627219	-0.5934	0.157267	0.314474	0.828078
MC58_13315	acetyl-CoA carboxylase subunit alpha	1	1579	-1.43775	8.35591e-07	-0.0540893	0.92491	0.363627	0.341006	-0.0582816	0.970289
MC58_13320	DNA polymerase III subunit alpha	3	1087	-1.59565	3.9788e-10	0.133631	0.679598	0.418987	0.0818671	-0.275605	0.58844
MC58_13350	molecular chaperone	1	1648	-1.11456	1.39877e-05	0.14656	0.720727	0.463291	0.260522	-0.311066	0.807985
MC58_13355	outer membrane protein assembly protein YaeT	1	2667	-2.12295	8.82027e-12	0.118033	0.740539	-0.284617	0.57162	-0.230825	0.850897
MC58_13360	zinc metallopeptidase RseP	1	1420	-1.34163	2.37823e-06	0.275568	0.496778	-0.151809	0.726575	0.458778	0.500408
MC58_13365	CDP-diglyceride synthetase	1	1602	-1.30837	1.06272e-06	0.334743	0.431078	0.248882	0.4156	0.0357976	0.975164
MC58_13385	uridylate kinase	1	2808	-1.7473	2.90785e-07	-0.0876568	0.887113	0.134164	0.789247	-0.429377	0.734241
MC58_13390	elongation factor Ts	1	1990	-3.40735	1.23221e-13	0.232335	0.608605	0.10674	0.836954	-0.426716	0.65463
MC58_13395	30S ribosomal protein S2	1	2304	-2.63981	2.18108e-12	0.23708	0.548034	0.607179	0.183904	-0.156192	0.921094
MC58_13400	methionine aminopeptidase	1	1606	-1.20711	0.000102356	0.304615	0.583932	0.567092	0.117513	0.076592	0.958242
MC58_13405	protein-PII uridylyltransferase	1	2741	-2.33527	3.4724e-11	0.476909	0.274956	0.12587	0.715957	-0.484482	0.455453
MC58_13410	2,3,4,5-tetrahydropyridine-2,6-carboxylate N-succinyltransferase	1	1471	-1.599	2.17253e-08	0.541939	0.106114	0.190597	0.622658	0.21984	0.829911
MC58_13415	MFS transporter	3	645	1.58575	1.05852e-07	-0.671552	0.0938466	0.4078	0.241745	0.199374	0.852762
MC58_13420	hypothetical protein	3	450	1.4668	1.33611e-06	-0.624235	0.0933664	-0.892999	0.0158164	-0.507465	0.40842
MC58_13430	transcriptional regulator	1	2185	-2.2406	7.1724e-09	0.589421	0.306378	1.55432	0.00254358	-0.642369	0.593185
MC58_13435	serine endoprotease	3	733	0.23235	0.264322	1.17167	5.16492e-05	0.208707	0.599979	0.968054	0.0239922
MC58_13445	5'-methylthioadenosine nucleosidase	1	1399	-1.15589	3.83979e-05	0.413166	0.322047	0.702236	0.142888	0.747812	0.367581
MC58_13450	vitamin B12-transporter protein BtuF	1	1439	-1.0422	0.0170482	0.585885	0.498483	0.471437	0.359213	0.467079	0.721892
MC58_13465	H(+)/Cl(-) exchange transporter ClcA	3	700	1.03511	2.62126e-05	-0.23998	0.575375	1.12747	0.00851036	-0.165678	0.918471
MC58_13485	fimbrial protein	1	2330	-0.959387	0.159707	-0.413317	0.770734	-0.22162	0.752708	-1.93845	0.0095963
MC58_13490	minor fimbrial subunit	1	1330	-2.0143	0.00258465	0.151144	0.916348	-1.09679	0.29505	1.92216	0.0742868
MC58_13495	fimbrial protein	1	2040	-3.335	0.000919626	0.014055	0.995544	0.62557	0.335483	0.800866	0.332227
MC58_13510	iron ABC transporter	1	2503	-2.07865	3.97129e-06	0.111463	0.908591	-0.453454	0.39622	-0.344601	0.848057
MC58_13515	iron-hydroxamate transporter substrate-bindingsubunit	1	2729	-1.57688	0.000919626	0.444506	0.649992	-0.0820845	0.907498	-0.422676	0.828078
MC58_13520	iron-hydroxamate transporter ATP-binding subunit	1	2362	-1.42678	0.00698758	0.358068	0.75387	-1.45921	0.0179295	-0.115675	0.964501
MC58_13525	ferrichrome transporter	1	2370	-1.45718	4.68255e-06	0.622768	0.220662	-1.12439	0.00300237	-0.348917	0.768313
MC58_13530	bifunctional glycosyl transferase/transpeptidase	1	1457	-1.22653	5.41007e-06	0.0846024	0.856825	0.137435	0.737838	0.399321	0.596789
MC58_13545	transcriptional regulator	3	451	2.82983	1.40105e-12	-0.405842	0.288279	-1.04267	0.00147358	-0.214656	0.774526
MC58_13550	RNA polymerase-binding transcription factor	3	359	1.74867	3.36875e-09	-0.372349	0.279215	-0.664322	0.0612481	0.0542405	0.969527
MC58_13560	poly(A) polymerase I	1	1521	-1.60258	8.873e-07	0.232762	0.679823	0.66972	0.128857	-0.142849	0.933666
MC58_13570	3-methyl-2-oxobutanoate hydroxymethyltransferase	1	1356	-2.33201	7.04545e-07	0.739249	0.340834	0.912492	0.0958369	0.518005	0.712514
MC58_13575	pantoate--beta-alanine ligase	1	1709	-2.6946	4.24826e-10	0.737065	0.193739	0.0459272	0.945853	0.339016	0.852469
MC58_13580	aspartate decarboxylase	1	1385	-1.33124	0.000184686	1.01053	0.0672677	0.731705	0.0559021	0.748638	0.248817
MC58_13585	hypothetical protein	1	1759	-2.26049	6.23313e-06	0.182183	0.867884	0.777943	0.135428	0.0334811	0.98353
MC58_13590	PTS sugar transporter subunit IIA	1	1127	-3.35765	1.10046e-06	1.15001	0.278963	1.11771	0.0386983	0.0584946	0.970289
MC58_13595	fimbrial protein StiA	1	1924	-2.7609	0.000123743	0.548093	0.690123	-1.04998	0.378509	-0.0716559	0.982874
MC58_13605	fimbrial assembly protein	1	1595	-1.45315	0.00273012	0.26868	0.787476	0.152468	0.77983	0.0211101	0.985798
MC58_13615	ABC transporter permease	1	2526	-1.56401	3.46854e-06	-0.437372	0.486846	-0.505968	0.239802	-0.400474	0.763758
MC58_13620	multidrug ABC transporter ATP-binding protein	1	2623	-1.73655	9.24526e-08	-0.383267	0.471314	0.0681382	0.851666	-0.436665	0.504724
MC58_13630	hypoxanthine phosphoribosyltransferase	3	963	-0.855554	0.00945753	-0.110718	0.888493	1.09592	0.00129929	0.0929403	0.944724
MC58_13635	glucose dehydrogenase	4	175	3.40256	7.46674e-16	-0.997151	0.000428843	0.665734	0.0577693	0.145984	0.889844
MC58_13645	hypothetical protein	3	707	-0.0161941	0.96144	0.723149	0.197073	1.23222	0.0218614	0.367386	0.828078
MC58_13650	spermidine synthase	1	2236	-2.9915	3.87612e-12	0.137149	0.797753	1.45059	0.000139641	-0.653776	0.366025
MC58_13655	S-adenosylmethionine decarboxylase	1	2270	-3.04812	1.9989e-12	0.249516	0.66437	1.05939	0.0287766	-0.332851	0.829911
MC58_13660	DeoR faimly transcriptional regulator	1	2437	-1.36351	1.64076e-05	0.495558	0.347096	-0.287084	0.530235	0.328835	0.816518
MC58_13680	hypothetical protein	1	1185	-0.843659	0.00102885	0.26567	0.608605	-1.4835	0.000800642	0.260977	0.864564
MC58_13695	bifunctional aconitate hydratase 2/2-methylisocitrate dehydratase	1	2440	-1.44056	1.86507e-05	0.541057	0.237329	-0.671385	0.13987	0.158945	0.918471
MC58_13715	dihydrolipoamide dehydrogenase	1	2651	-1.76636	1.21403e-07	0.145818	0.760186	-0.346958	0.38891	-0.113244	0.93689
MC58_13720	pyruvate dehydrogenase	1	2128	-3.22485	1.49144e-13	-0.0614132	0.902318	-0.267648	0.583235	0.0117427	0.990495
MC58_13725	pyruvate dehydrogenase	1	2129	-3.24728	3.31964e-16	-0.141209	0.682127	-0.337337	0.340495	-0.18827	0.829911
MC58_13735	amino acid permease	3	846	-0.00347602	0.988806	-0.227392	0.634821	1.70212	0.000210905	-0.243247	0.876296
MC58_13745	alpha-N-arabinofuranosidase	3	999	-0.787459	0.099821	-0.599829	0.534572	1.4369	0.00585428	-1.08894	0.0917482
MC58_13755	N-acetyl-anhydromuranmyl-L-alanine amidase	1	1468	-1.68415	2.80642e-08	0.651456	0.101102	0.148757	0.644443	0.109206	0.918471
MC58_13770	hypothetical protein	1	2425	-1.60934	0.00838166	0.906101	0.390794	-0.169371	0.801678	0.741713	0.368401
MC58_13775	type IV pilin biogenesis protein	1	1327	-2.9818	0.000215671	2.21045	0.0481431	-1.19025	0.0989264	2.00947	0.0119794
MC58_13780	guanosine 5'-monophosphate oxidoreductase	1	2303	-2.45431	3.02018e-11	0.296395	0.550544	0.602406	0.0437262	-0.124475	0.918471
MC58_13785	dephospho-CoA kinase	1	2574	-1.46223	0.000220082	0.246217	0.767669	-0.445168	0.228927	0.37043	0.721892
MC58_13790	hypothetical protein	1	2852	-2.45386	4.51894e-10	0.311188	0.602751	-0.257988	0.607634	0.028965	0.984475
MC58_13795	DNA gyrase inhibitor	1	1903	-2.58795	3.86126e-06	1.00067	0.275577	-0.789386	0.182971	-0.347899	0.847416
MC58_13800	LysR family transcriptional regulator	3	853	-0.623743	0.37614	0.10418	0.944245	2.18542	0.0282597	-0.625643	0.772584
MC58_13805	aldo/keto reductase	2	274	-1.74375	0.0448185	2.11286	0.128825	1.44704	0.04773	0.423691	0.828078
MC58_13810	nucleoside triphosphate hydrolase	1	1748	-2.15376	2.63646e-08	-0.226474	0.747555	0.458483	0.182823	-0.193205	0.882917
MC58_13815	preprotein translocase subunit SecA	1	2088	-2.55577	1.76408e-12	0.147461	0.720558	0.384261	0.489897	-0.176759	0.925575
MC58_13820	SecA regulator SecM	1	1575	-1.21147	5.41672e-06	0.0726339	0.891931	0.339984	0.363132	0.0315921	0.982044
MC58_13825	UDP-3-O-[3-hydroxymyristoyl] N-acetylglucosaminedeacetylase	1	1392	-0.522085	0.0308635	0.735671	0.0288212	0.428388	0.279136	1.2512	0.005404
MC58_13845	D-alanine--D-alanine ligase	1	1563	-1.0788	3.51091e-06	-0.0476949	0.910402	0.126036	0.782269	-0.0629352	0.967438
MC58_13850	UDP-N-acetylmuramate--alanine ligase	1	1553	-1.26561	5.19738e-06	0.230206	0.583256	0.0522345	0.913035	-0.120716	0.931728
MC58_13855	UDP-diphospho-muramoylpentapeptide beta-N-acetylglucosaminyltransferase	1	1646	-1.15061	8.21471e-07	0.298948	0.36028	0.393005	0.347535	-0.383831	0.738705
MC58_13860	flippase	1	2558	-1.34825	4.31927e-06	0.137715	0.797022	-0.313582	0.523684	-0.383262	0.802943
MC58_13865	UDP-N-acetylmuramoyl-L-alanyl-D-glutamatesynthetase	1	2645	-1.63532	8.50726e-08	0.193124	0.675623	-0.333481	0.473993	-0.532488	0.627697
MC58_13870	phospho-N-acetylmuramoyl-pentapeptide-transferase	1	2630	-1.48639	6.33456e-08	-0.125869	0.775642	-0.384338	0.389816	-0.39545	0.765314
MC58_13875	UDP-N-acetylmuramoyl-tripeptide--D-alanyl-D-alanineligase	1	2566	-1.29354	9.82187e-07	0.0775506	0.869598	-0.253964	0.539149	-0.228638	0.861949
MC58_13880	UDP-N-acetylmuramoylalanyl-D-glutamate--2, 6-diaminopimelate ligase	1	1550	-1.12457	1.05928e-05	0.0344727	0.93857	-0.236251	0.623443	-0.277592	0.84705
MC58_13885	cell division protein FtsI	1	2553	-1.29912	2.54079e-07	0.354064	0.300293	-0.446855	0.260815	-0.0872756	0.949914
MC58_13890	cell division protein FtsL	1	2405	-1.49601	4.9156e-05	0.510284	0.444226	-0.892009	0.023939	0.300671	0.827278
MC58_13895	16S rRNA methyltransferase	1	2538	-1.01356	3.49357e-06	0.503107	0.0585264	-0.28708	0.546787	-0.115577	0.928057
MC58_13905	transcriptional regulator	1	1437	-1.38264	0.000433948	0.649878	0.344598	0.279573	0.496123	0.673989	0.335894
MC58_13925	leu operon leader peptide	3	637	1.73218	0.0130781	-0.439968	0.743235	0.574394	0.558527	0.813567	0.547746	Leucine biosynthesis (ilv-leu) operon
MC58_13930	2-isopropylmalate synthase	3	791	0.270621	0.234714	1.00918	0.00170736	2.64794	3.38652e-07	0.267616	0.827278
MC58_13935	3-isopropylmalate dehydrogenase	3	794	-0.104394	0.705682	0.908014	0.0353701	2.60547	8.50074e-08	-0.0589545	0.96584
MC58_13940	isopropylmalate isomerase	3	793	0.0432621	0.848103	0.867912	0.0052135	2.419	9.02424e-06	0.0051182	0.997394
MC58_13945	isopropylmalate isomerase	3	776	0.0332408	0.942769	0.96062	0.206402	2.51071	8.16716e-07	-0.713065	0.313399
MC58_13955	inhibitor of glucose transporter	1	1244	-1.09772	4.52913e-05	0.546656	0.193739	-0.72638	0.360595	1.02553	0.520823
MC58_13960	transcriptional regulator SgrR	3	411	1.46426	1.71431e-05	-0.542526	0.307793	0.449707	0.270791	0.391222	0.723663
MC58_13970	thiamine ABC transporter permease	3	969	-1.2156	0.00401894	-0.13467	0.890737	1.09707	0.127016	0.355703	0.850468
MC58_13990	ribulokinase	3	800	-0.236121	0.722518	1.32647	0.206314	2.1958	0.00056479	-1.75718	0.0108637
MC58_13995	sugar isomerase	3	780	0.478565	0.398076	0.638218	0.531226	1.73268	0.00348717	-0.795102	0.443329
MC58_14005	cytoplasmic protein	1	1747	-2.05222	0.000371565	-0.187952	0.877975	0.636379	0.217228	0.0340525	0.981882
MC58_14020	ATP-dependent helicase	1	2276	-2.81845	2.28876e-11	0.042047	0.944245	0.94203	0.0161048	-0.760075	0.303689
MC58_14025	23S rRNA pseudouridylate synthase	1	2246	-2.6174	7.05425e-07	-0.397266	0.70795	0.875716	0.0919319	-1.01276	0.204105
MC58_14030	Dna-J like membrane chaperone protein	1	2596	-1.93417	4.78053e-06	0.35705	0.646445	-0.53722	0.193848	-0.140319	0.928752
MC58_14040	peptidylprolyl isomerase	1	2535	-1.11203	4.36439e-05	-0.164684	0.724181	-0.344431	0.221784	-0.119552	0.908819
MC58_14045	4-hydroxythreonine-4-phosphate dehydrogenase	3	1066	-1.19158	2.35409e-05	-0.27338	0.593806	0.320095	0.258164	-0.381535	0.547847
MC58_14065	dihydrofolate reductase	1	1628	-1.37458	1.24233e-06	0.444214	0.323759	0.55088	0.130221	-0.129159	0.924887
MC58_14075	potassium transporter KefF	3	363	1.97285	4.2011e-05	-0.443501	0.572205	-0.667474	0.0486572	-0.249233	0.832751
MC58_14095	hypothetical protein	3	531	0.866739	0.00664733	-1.18417	0.0282149	0.822235	0.0551318	-0.963875	0.220271
MC58_14105	lipoprotein	4	197	6.61747	1.79291e-18	0.261704	0.506252	1.12427	0.0114665	2.52879	1.92283e-05
MC58_14120	oxidoreductase	3	1022	-1.32636	0.0187208	0.477898	0.663321	0.498746	0.37141	-0.921077	0.17968
MC58_14125	protein fixB	3	971	-0.974137	0.077606	-0.14485	0.906971	1.40482	0.00825296	0.153001	0.918471
MC58_14130	electron transfer flavoprotein	1	2214	-2.32139	0.000786058	0.768729	0.531864	0.876117	0.438105	-1.20015	0.475367
MC58_14145	crotonobetainyl-CoA:carnitine CoA-transferase	3	978	-1.15899	0.0355579	0.596073	0.578845	0.798279	0.330695	-0.454209	0.818642
MC58_14150	crotonobetainyl-CoA:carnitine CoA-transferase	1	1725	-2.16407	9.8358e-07	0.298184	0.723732	0.0606872	0.907343	0.232766	0.881365
MC58_14155	crotonobetainyl-CoA:carnitine CoA-transferase	3	1051	-1.88361	5.0904e-06	-0.198419	0.815533	0.614826	0.340495	-0.726766	0.571243
MC58_14160	carnitinyl-CoA dehydratase	1	1514	-1.54897	0.00857254	-0.0485495	0.96985	0.693261	0.553619	0.0133926	0.994427
MC58_14165	phenylacetic acid degradation protein PaaY	3	547	-1.84759	0.000561583	-0.567929	0.578909	0.822904	0.344191	-2.05122	0.038045
MC58_14170	transcriptional regulator	1	1922	-2.81328	4.56528e-07	-0.180611	0.874743	-1.45545	0.0236748	-0.310814	0.889844
MC58_14175	carbamoyl phosphate synthase large subunit	1	1969	-2.98869	1.9029e-11	-0.0215188	0.969647	-0.639161	0.229509	-0.688405	0.478372
MC58_14180	carbamoyl phosphate synthase small subunit	1	2746	-2.42289	2.65733e-10	0.132312	0.797463	0.250165	0.601221	-0.642499	0.471431
MC58_14185	dihydrodipicolinate reductase	2	325	0.646968	0.0125089	0.773546	0.0476479	3.21208	2.16844e-07	-0.115848	0.944941
MC58_14195	apo-citrate lyase phosphoribosyl-dephospho-CoAtransferase	2	277	-2.16468	0.0359836	1.91632	0.280484	2.65499	0.018797	0.401747	0.918471
MC58_14200	citrate lyase subunit alpha	1	2157	-1.35759	0.0329352	-0.886417	0.498107	0.487241	0.38715	-1.32542	0.0327577
MC58_14240	histidine kinase	3	510	-0.190183	0.395338	-1.29009	0.0019993	0.0416843	0.945853	0.0308118	0.985528
MC58_14245	two-component response regulator DpiA	1	2474	-2.0509	8.10483e-05	-0.47182	0.676672	-0.313445	0.48034	0.100073	0.949339
MC58_14260	nitrite reductase	3	1059	-1.37012	0.000507851	-0.255667	0.766777	0.765851	0.0398451	-0.651853	0.339056
MC58_14275	lipoprotein signal peptidase	1	2434	-1.47812	1.24033e-06	0.694599	0.0994836	-0.362274	0.323048	0.550991	0.413633
MC58_14280	isoleucine--tRNA ligase	1	1700	-1.91691	6.715e-10	0.592776	0.0598177	0.209015	0.616054	0.14295	0.910478
MC58_14285	hypothetical protein	1	1621	-1.01092	0.000279566	0.217417	0.67263	0.717332	0.0343902	0.042518	0.974428
MC58_14290	hypothetical protein	3	385	1.45769	0.0124775	-0.278496	0.797463	-0.425228	0.415195	0.290896	0.850897
MC58_14295	30S ribosomal protein S20	3	928	-1.03611	0.0224444	0.846708	0.296991	0.83752	0.106384	0.509058	0.627697
MC58_14300	sodium:solute symporter	3	535	-0.627355	0.187514	-1.28084	0.153829	-0.121245	0.890681	-2.32677	0.00898251
MC58_14310	transcriptional regulator	1	2494	-1.66418	2.78166e-07	-0.335202	0.544376	-0.583997	0.148051	-0.845	0.241742
MC58_14325	cytoplasmic protein	3	1016	-1.68995	0.017681	0.0692388	0.966344	0.398041	0.619589	-1.42704	0.112117
MC58_14345	5'-nucleotidase	1	1462	-1.30338	0.00310008	-0.217682	0.813213	-0.0541439	0.931287	0.138113	0.93689
MC58_14350	arylsulfatase	1	2048	-3.57897	1.23257e-06	0.0680804	0.965902	0.306246	0.501422	-0.359915	0.705709
MC58_14360	LysR family transcriptional regulator	3	859	-0.922493	0.154382	-0.859671	0.50819	1.54353	0.00124508	-0.283117	0.761521
MC58_14370	membrane protein	3	817	0.458864	0.449172	-0.749859	0.491777	1.43747	0.0207244	-0.468592	0.714759
MC58_14375	hypothetical protein	1	2107	-2.54594	7.87614e-08	0.0903912	0.921449	-0.179519	0.737838	-0.262407	0.85977
MC58_14380	pili assembly chaperone	1	2155	-1.70242	0.00294818	-0.839069	0.442351	0.303303	0.618539	-0.913516	0.248601
MC58_14400	outer membrane usher protein	3	542	-2.61208	6.09879e-06	-0.162191	0.900496	0.107933	0.893313	-2.20774	0.00898251
MC58_14415	cytoplasmic protein	3	519	-0.541608	0.490713	-1.21043	0.44674	1.04218	0.030839	0.291282	0.763435
MC58_14445	regulatory protein	1	2126	-2.96231	3.12283e-08	-0.270926	0.784294	-0.250245	0.686554	0.113493	0.945084
MC58_14450	molecular chaperone DnaJ	1	1303	-2.4559	5.33568e-10	1.66077	9.63866e-05	-0.569994	0.0483839	0.311332	0.646021
MC58_14455	molecular chaperone DnaK	1	1299	-2.39331	1.98453e-11	2.28057	2.51043e-09	-0.781846	0.0522364	0.71035	0.17968
MC58_14460	hypothetical protein	1	1617	-1.19043	0.0450708	0.225872	0.857653	0.438366	0.44662	0.363205	0.795304
MC58_14465	hypothetical protein	1	1117	-2.43074	0.00138644	2.76489	0.00635184	0.576395	0.417102	-0.107261	0.960135
MC58_14470	hypothetical protein	1	2142	-1.90558	0.000142292	-0.51446	0.603145	1.68597	0.000348938	-0.968602	0.0650173
MC58_14480	transaldolase	1	2660	-1.93622	4.10022e-11	0.158567	0.647202	-0.201796	0.64885	0.013557	0.988655
MC58_14490	hypothetical protein	2	251	-0.929416	0.000384216	1.59436	1.75843e-05	-0.0570425	0.929174	1.90504	0.00339453
MC58_14505	aspartate kinase	3	834	-0.817397	0.000369789	0.500362	0.14057	1.4437	0.000706699	0.0195721	0.985859
MC58_14515	RNA methyltransferase	1	2478	-1.47489	1.90555e-06	-0.614201	0.250285	-0.865706	0.110028	-0.0246537	0.987181
MC58_14530	periplasmic protein	1	1140	-2.1127	0.000136358	1.52569	0.073157	0.833566	0.03583	-0.890143	0.16551
MC58_14535	membrane protein	3	489	1.21539	0.000280783	-1.05135	0.047813	-0.193429	0.69886	-0.757522	0.447305
MC58_14540	fimbrial protein SthA	1	2629	-1.74764	0.00245279	-0.137656	0.910402	-0.298177	0.722088	-0.252549	0.905721
MC58_14545	fimbrial assembly protein	1	2278	-2.69003	0.00364263	0.0698145	0.972346	1.11715	0.107652	-0.442655	0.752961
MC58_14555	fimbrial protein SthD	3	1043	-2.04453	0.000675091	0.373082	0.745701	0.897537	0.157183	-0.651512	0.557721
MC58_14560	major fimbrial protein SthE	1	2169	-1.87043	3.12959e-05	-0.780989	0.342505	0.265381	0.652965	-0.373237	0.828105
MC58_14570	histidine kinase	1	2728	-1.44182	0.000134172	0.392944	0.595376	-0.0323311	0.961988	-0.384878	0.839798
MC58_14575	transcriptional regulator	1	1685	-1.51287	2.27243e-06	0.716301	0.152578	-0.00584417	0.991375	0.317948	0.806803
MC58_14580	hypothetical protein	1	2385	-2.14201	2.9134e-09	0.911311	0.0401102	-1.11037	0.00509746	0.627359	0.417211
MC58_14600	Trp operon repressor	3	711	0.139322	0.580531	0.0983179	0.866565	1.49424	3.27873e-05	0.573127	0.300295
MC58_14610	ABC transporter ATP-binding protein	1	1567	-1.55539	6.91979e-07	0.24738	0.603145	0.249421	0.589057	-0.187896	0.904179
[truncated: 1,046 more rows]
